# Supplementary material for: Nutritional Heterogeneity Among Aspergillus fumigatus Strains Has Consequences for Virulence in a Strain- and Host-Dependent Manner
Source: Front Microbiol. 2019 Apr 24;10:854. doi: 10.3389/fmicb.2019.00854 (PMC6492530; doi:10.3389/fmicb.2019.00854)
Supplement: Supplementary file 4 [file Table_4.xlsx]

## Sheet: SNPs
Table S4. Mutations identified in the genome of Afs35 when compared to the genome of A1163. Shown are the type (SNP = single nucleotide polymorphism, Indel = insertion deletion, CNV = copy number variation) and localisation of each mutation. Column (col) 1 depicts mutation class, col 2 mutation type, col 3 A1163 scaffold, col 4 start of mutation, col 5 end of mutation, col 6 detail of mutation, c…
#	File Explanation
#	col1: mutation class
#	col2: mutation type
#	col3: A1163 scaffold
#	col4: start of mutation
#	col5: end of mutation
#	col6: mutation specific
#		SNPs are represented with the nucleotide in A1163 followed by the nucleotide in afs35. For example, the notation A->T indicates an A in A1163 and a T in afs35
#	col7: a binary for if the mutation overlaps with a gene.
#		Y indicates yes, the mutation overlaps with a gene. N indicates no, the mutation does not overlap with a gene
#	col8: Gene ID
#		if col7 is Y, then a gene ID is provided
#	col9: gene start
#	col10: gene end
Mutation Class	Mutation Type	Scaffold	Start	End	Mutation Specific	Overlaps a gene (Y/N)	Gene ID	Gene Start	Gene End	Standard Name	Gene Description
Small-scale	SNP	scf_000001_A_fumigatus_A1163	2142509	2142510	A->G	Y	AFUB_007640	2140321	2142921	NA	Ortholog of A. nidulans FGSC A4 : AN5141, A. niger CBS 513.88 : An07g09830, A. oryzae RIB40 : AO090012000982, Aspergillus wentii : Aspwe1_0172497 and Aspergillus sydowii : Aspsy1_0033440
Small-scale	SNP	scf_000001_A_fumigatus_A1163	2145391	2145392	G->A	Y	AFUB_007660	2145041	2146139	NA	Ortholog of A. nidulans FGSC A4 : AN10645, A. niger CBS 513.88 : An07g09850, A. oryzae RIB40 : AO090012000984, Aspergillus wentii : Aspwe1_0040933 and Aspergillus sydowii : Aspsy1_0155965
Small-scale	SNP	scf_000001_A_fumigatus_A1163	2145410	2145411	A->G	Y	AFUB_007660	2145041	2146139	NA	Ortholog of A. nidulans FGSC A4 : AN10645, A. niger CBS 513.88 : An07g09850, A. oryzae RIB40 : AO090012000984, Aspergillus wentii : Aspwe1_0040933 and Aspergillus sydowii : Aspsy1_0155965
Small-scale	SNP	scf_000001_A_fumigatus_A1163	2151358	2151359	T->C	Y	AFUB_007680	2149778	2151738	ilv3C	Putative dihydroxy acid dehydratase
Small-scale	SNP	scf_000001_A_fumigatus_A1163	2152106	2152107	C->T	Y	AFUB_007690	2152034	2154124	NA	Ortholog(s) have role in hyphal growth
Small-scale	SNP	scf_000001_A_fumigatus_A1163	2153757	2153758	A->G	Y	AFUB_007690	2152034	2154124	NA	Ortholog(s) have role in hyphal growth
Small-scale	SNP	scf_000001_A_fumigatus_A1163	2161351	2161352	A->G	Y	AFUB_007730	2160051	2166649	NA	Putative NADH-dependent glutamate synthase
Small-scale	SNP	scf_000001_A_fumigatus_A1163	2192330	2192331	C->T	Y	AFUB_007830	2191612	2195030	NA	Ortholog(s) have RNA polymerase II core binding, mRNA binding activity and role in mRNA polyadenylation, pre-mRNA cleavage required for polyadenylation, termination of RNA polymerase II transcription
Small-scale	SNP	scf_000001_A_fumigatus_A1163	2193336	2193337	T->G	Y	AFUB_007830	2191612	2195030	NA	Ortholog(s) have RNA polymerase II core binding, mRNA binding activity and role in mRNA polyadenylation, pre-mRNA cleavage required for polyadenylation, termination of RNA polymerase II transcription
Small-scale	SNP	scf_000001_A_fumigatus_A1163	2193595	2193596	C->A	Y	AFUB_007830	2191612	2195030	NA	Ortholog(s) have RNA polymerase II core binding, mRNA binding activity and role in mRNA polyadenylation, pre-mRNA cleavage required for polyadenylation, termination of RNA polymerase II transcription
Small-scale	SNP	scf_000001_A_fumigatus_A1163	2193707	2193708	A->G	Y	AFUB_007830	2191612	2195030	NA	Ortholog(s) have RNA polymerase II core binding, mRNA binding activity and role in mRNA polyadenylation, pre-mRNA cleavage required for polyadenylation, termination of RNA polymerase II transcription
Small-scale	SNP	scf_000001_A_fumigatus_A1163	2202300	2202301	C->T	Y	AFUB_007870	2201557	2203263	NA	Has domain(s) with predicted ubiquitinyl hydrolase activity and role in protein deubiquitination, ubiquitin-dependent protein catabolic process
Small-scale	SNP	scf_000001_A_fumigatus_A1163	2202847	2202848	G->A	Y	AFUB_007870	2201557	2203263	NA	Has domain(s) with predicted ubiquitinyl hydrolase activity and role in protein deubiquitination, ubiquitin-dependent protein catabolic process
Small-scale	SNP	scf_000001_A_fumigatus_A1163	2215059	2215060	A->G	Y	AFUB_007900	2214955	2216209	NA	Ortholog(s) have role in cytoplasmic microtubule organization, establishment or maintenance of cell polarity and cytosol, nucleus localization
Small-scale	SNP	scf_000001_A_fumigatus_A1163	2236434	2236435	A->G	Y	AFUB_007990	2235925	2239252	NA	Ortholog of A. nidulans FGSC A4 : AN5108, A. niger CBS 513.88 : An07g10310, A. oryzae RIB40 : AO090012001018, Aspergillus wentii : Aspwe1_0055253 and Aspergillus sydowii : Aspsy1_0091561
Small-scale	SNP	scf_000001_A_fumigatus_A1163	2240551	2240552	A->C	Y	AFUB_008000	2239431	2242383	NA	Ortholog(s) have role in macroautophagy and Golgi apparatus, endoplasmic reticulum, pre-autophagosomal structure localization
Small-scale	SNP	scf_000001_A_fumigatus_A1163	2256703	2256704	G->C	Y	AFUB_008050	2255100	2258525	NA	Ortholog(s) have FACT complex, mitotic spindle pole body localization
Small-scale	SNP	scf_000001_A_fumigatus_A1163	2261797	2261798	A->G	Y	AFUB_008070	2260303	2262024	NA	Ortholog(s) have phospholipid-translocating ATPase activity and role in actin cortical patch localization, endocytosis, intracellular protein transport, phospholipid translocation
Small-scale	SNP	scf_000001_A_fumigatus_A1163	2285624	2285625	A->G	Y	AFUB_008090	2284872	2286189	NA	NA
Small-scale	SNP	scf_000001_A_fumigatus_A1163	2326015	2326016	G->A	Y	AFUB_008100	2324804	2326027	NA	Ortholog(s) have porphobilinogen synthase activity, role in heme biosynthetic process and cytosol, nucleus localization
Small-scale	SNP	scf_000001_A_fumigatus_A1163	2331465	2331466	T->C	Y	AFUB_008130	2330795	2335709	NA	Ortholog(s) have nuclear export signal receptor activity, role in cellular response to oxidative stress, protein export from nucleus and cytosol, nuclear envelope, nuclear periphery localization
Small-scale	SNP	scf_000001_A_fumigatus_A1163	2331721	2331722	C->T	Y	AFUB_008130	2330795	2335709	NA	Ortholog(s) have nuclear export signal receptor activity, role in cellular response to oxidative stress, protein export from nucleus and cytosol, nuclear envelope, nuclear periphery localization
Small-scale	SNP	scf_000001_A_fumigatus_A1163	2336518	2336519	T->G	Y	AFUB_008140	2335758	2336608	NA	NA
Small-scale	SNP	scf_000001_A_fumigatus_A1163	2337124	2337125	T->C	Y	AFUB_008150	2336983	2339405	NA	Has domain(s) with predicted role in meiotic chromosome segregation and chromosome, centromeric region, nucleus localization
Small-scale	SNP	scf_000001_A_fumigatus_A1163	2348361	2348362	A->T	Y	AFUB_008170	2346815	2349860	NA	Mitochondrial glycerol-3-phosphate dehydrogenase
Small-scale	SNP	scf_000001_A_fumigatus_A1163	2360574	2360575	A->G	Y	AFUB_008240	2360264	2361729	NA	Ortholog of A. nidulans FGSC A4 : AN10186, A. niger CBS 513.88 : An08g00290, Neosartorya fischeri NRRL 181 : NFIA_016830, Aspergillus wentii : Aspwe1_0036259 and Aspergillus clavatus NRRL 1 : ACLA_026670
Small-scale	SNP	scf_000001_A_fumigatus_A1163	2372894	2372895	T->C	Y	AFUB_008300	2372889	2373229	NA	Ortholog(s) have copper chaperone activity and role in cellular copper ion homeostasis, cellular iron ion homeostasis, cellular response to oxidative stress, copper ion transport, regulation of iron ion transmembrane transport
Small-scale	SNP	scf_000001_A_fumigatus_A1163	2375235	2375236	A->C	Y	AFUB_008310	2373934	2377364	NA	Ortholog of Aspergillus fumigatus A1163 : AFUB_008310
Small-scale	SNP	scf_000001_A_fumigatus_A1163	2382291	2382292	C->A	Y	AFUB_008330	2381836	2384594	NA	Has domain(s) with predicted catalytic activity
Small-scale	SNP	scf_000001_A_fumigatus_A1163	2394189	2394190	C->G	Y	AFUB_008370	2393483	2394709	NA	Ortholog(s) have protein-arginine omega-N monomethyltransferase activity and role in peptidyl-arginine methylation
Small-scale	SNP	scf_000001_A_fumigatus_A1163	2395637	2395638	T->A	Y	AFUB_008380	2395158	2396960	NA	Ortholog of A. nidulans FGSC A4 : AN1383, A. niger CBS 513.88 : An08g00450, A. oryzae RIB40 : AO090005001630, Aspergillus wentii : Aspwe1_0048794 and Aspergillus sydowii : Aspsy1_0025360
Small-scale	SNP	scf_000001_A_fumigatus_A1163	2396240	2396241	C->G	Y	AFUB_008380	2395158	2396960	NA	Ortholog of A. nidulans FGSC A4 : AN1383, A. niger CBS 513.88 : An08g00450, A. oryzae RIB40 : AO090005001630, Aspergillus wentii : Aspwe1_0048794 and Aspergillus sydowii : Aspsy1_0025360
Small-scale	SNP	scf_000001_A_fumigatus_A1163	2396731	2396732	G->A	Y	AFUB_008380	2395158	2396960	NA	Ortholog of A. nidulans FGSC A4 : AN1383, A. niger CBS 513.88 : An08g00450, A. oryzae RIB40 : AO090005001630, Aspergillus wentii : Aspwe1_0048794 and Aspergillus sydowii : Aspsy1_0025360
Small-scale	SNP	scf_000001_A_fumigatus_A1163	2424717	2424718	C->T	Y	AFUB_008490	2422497	2426932	NA	Ortholog of A. nidulans FGSC A4 : AN1374, A. niger CBS 513.88 : An08g00580, A. oryzae RIB40 : AO090005001598, Aspergillus wentii : Aspwe1_0065603 and Aspergillus sydowii : Aspsy1_0025369
Small-scale	SNP	scf_000001_A_fumigatus_A1163	2431555	2431556	C->T	Y	AFUB_008500	2429460	2432223	NA	Ortholog of A. niger CBS 513.88 : An08g00590, A. oryzae RIB40 : AO090005001599, Aspergillus wentii : Aspwe1_0024523, Aspergillus sydowii : Aspsy1_0138507 and Aspergillus terreus NIH2624 : ATET_08533
Small-scale	SNP	scf_000001_A_fumigatus_A1163	2433786	2433787	G->A	Y	AFUB_008510	2432402	2433884	NA	Ortholog(s) have 2 iron, 2 sulfur cluster binding, glutathione-disulfide reductase activity, iron ion binding, protein homodimerization activity and role in cellular response to oxidative stress
Small-scale	SNP	scf_000001_A_fumigatus_A1163	2438309	2438310	C->T	Y	AFUB_008530	2436044	2438524	NA	Ortholog(s) have triglyceride lipase activity and role in triglyceride mobilization
Small-scale	SNP	scf_000001_A_fumigatus_A1163	2438476	2438477	A->G	Y	AFUB_008530	2436044	2438524	NA	Ortholog(s) have triglyceride lipase activity and role in triglyceride mobilization
Small-scale	SNP	scf_000001_A_fumigatus_A1163	2441808	2441809	G->A	Y	AFUB_008550	2441440	2444496	NA	Protein of unknown function identified by mass spectrometry
Small-scale	SNP	scf_000001_A_fumigatus_A1163	2445921	2445922	T->A	Y	AFUB_008560	2445551	2449222	NA	Ortholog of A. nidulans FGSC A4 : AN1373, A. niger CBS 513.88 : An08g00660, Aspergillus sydowii : Aspsy1_0037814 and Aspergillus terreus NIH2624 : ATET_08538
Small-scale	SNP	scf_000001_A_fumigatus_A1163	2452543	2452544	A->G	Y	AFUB_008580	2452519	2452971	NA	Ortholog of A. nidulans FGSC A4 : AN1371, A. oryzae RIB40 : AO090005001607, Aspergillus wentii : Aspwe1_0104655 and Aspergillus terreus NIH2624 : ATET_08540
Small-scale	SNP	scf_000001_A_fumigatus_A1163	2455970	2455971	C->T	Y	AFUB_008600	2455613	2457140	NA	Has domain(s) with predicted role in histone modification, transcription elongation from RNA polymerase II promoter and Cdc73/Paf1 complex localization
Small-scale	SNP	scf_000001_A_fumigatus_A1163	2473319	2473320	C->T	Y	AFUB_008690	2473231	2476902	NA	Ortholog(s) have role in cell morphogenesis, negative regulation of sexual sporulation resulting in formation of a cellular spore, phialide development, sexual sporulation resulting in formation of a cellular spore
Small-scale	SNP	scf_000001_A_fumigatus_A1163	2479939	2479940	A->G	Y	AFUB_008700	2478455	2480286	ptcB	Putative type 2C protein phosphatase (PP2C) involved in dephosphorylation of SakA MAP kinase in response to osmotic stress
Small-scale	SNP	scf_000001_A_fumigatus_A1163	2486618	2486619	C->G	Y	AFUB_008730	2486440	2488424	NA	Ortholog(s) have cytoplasm localization
Small-scale	SNP	scf_000001_A_fumigatus_A1163	2492243	2492244	T->C	Y	AFUB_008750	2491368	2493199	NA	Ortholog(s) have sequence-specific DNA binding activity and role in cytoplasmic translational initiation
Small-scale	SNP	scf_000001_A_fumigatus_A1163	2503671	2503672	G->A	Y	AFUB_008830	2503098	2503706	NA	Ortholog(s) have U2-type spliceosomal complex, cytosol localization
Small-scale	SNP	scf_000001_A_fumigatus_A1163	2508118	2508119	G->A	Y	AFUB_008850	2505898	2508395	NA	Has domain(s) with predicted nucleic acid binding activity
Small-scale	SNP	scf_000001_A_fumigatus_A1163	2509533	2509534	G->A	Y	AFUB_008860	2509132	2509866	NA	Ortholog(s) have structural constituent of ribosome activity and mitochondrial large ribosomal subunit localization
Small-scale	SNP	scf_000001_A_fumigatus_A1163	2546920	2546921	C->T	Y	AFUB_009020	2545463	2547391	NA	Ortholog of A. nidulans FGSC A4 : AN1336, A. niger CBS 513.88 : An08g01160, A. oryzae RIB40 : AO090012000913, Aspergillus wentii : Aspwe1_0024569 and Aspergillus sydowii : Aspsy1_0037865
Small-scale	SNP	scf_000001_A_fumigatus_A1163	2555811	2555812	G->C	Y	AFUB_009060	2554102	2556228	NA	Ortholog of A. nidulans FGSC A4 : AN1327, A. niger CBS 513.88 : An08g01200, A. oryzae RIB40 : AO090012000908, Aspergillus wentii : Aspwe1_0080095 and Aspergillus sydowii : Aspsy1_0053045
Small-scale	SNP	scf_000001_A_fumigatus_A1163	2571614	2571615	C->T	Y	AFUB_009100	2571586	2573299	NA	Putative GPI anchored protein
Small-scale	SNP	scf_000001_A_fumigatus_A1163	2583854	2583855	C->G	Y	AFUB_009130	2583690	2586568	NA	Ortholog(s) have role in retrograde transport, endosome to Golgi and Golgi membrane, Golgi trans cisterna, fungal-type vacuole membrane localization
Small-scale	SNP	scf_000001_A_fumigatus_A1163	2585483	2585484	G->A	Y	AFUB_009130	2583690	2586568	NA	Ortholog(s) have role in retrograde transport, endosome to Golgi and Golgi membrane, Golgi trans cisterna, fungal-type vacuole membrane localization
Small-scale	SNP	scf_000001_A_fumigatus_A1163	2604600	2604601	G->C	Y	AFUB_009220	2604406	2609940	NA	Ortholog of A. nidulans FGSC A4 : AN1288, A. niger CBS 513.88 : An08g01580, A. oryzae RIB40 : AO090012000866, Aspergillus wentii : Aspwe1_0036503 and Aspergillus sydowii : Aspsy1_0025457
Small-scale	SNP	scf_000001_A_fumigatus_A1163	2608187	2608188	T->C	Y	AFUB_009220	2604406	2609940	NA	Ortholog of A. nidulans FGSC A4 : AN1288, A. niger CBS 513.88 : An08g01580, A. oryzae RIB40 : AO090012000866, Aspergillus wentii : Aspwe1_0036503 and Aspergillus sydowii : Aspsy1_0025457
Small-scale	SNP	scf_000001_A_fumigatus_A1163	2621383	2621384	T->C	Y	AFUB_009270	2619964	2623596	NA	Ortholog(s) have cytosol localization
Small-scale	SNP	scf_000001_A_fumigatus_A1163	2631215	2631216	A->G	Y	AFUB_009310	2629158	2633493	NA	Has domain(s) with predicted phosphatidylinositol binding activity and role in cell communication
Small-scale	SNP	scf_000001_A_fumigatus_A1163	2646433	2646434	A->G	Y	AFUB_009380	2645112	2647101	NA	Ortholog of A. nidulans FGSC A4 : AN11936, A. niger CBS 513.88 : An08g01750, A. oryzae RIB40 : AO090038000441, Neosartorya fischeri NRRL 181 : NFIA_015690 and Aspergillus clavatus NRRL 1 : ACLA_025570
Small-scale	SNP	scf_000001_A_fumigatus_A1163	2669547	2669548	A->G	Y	AFUB_009460	2668184	2669550	NA	Ortholog(s) have role in ascospore formation, asexual sporulation resulting in formation of a cellular spore and mitochondrion, nucleus localization
Small-scale	SNP	scf_000001_A_fumigatus_A1163	2672033	2672034	T->C	Y	AFUB_009470	2669776	2673598	NA	Has domain(s) with predicted ATP binding, ATP-dependent helicase activity, helicase activity, nucleic acid binding activity
Small-scale	SNP	scf_000001_A_fumigatus_A1163	2680725	2680726	G->T	Y	AFUB_009520	2680336	2681292	NA	Ortholog(s) have extracellular region localization
Small-scale	SNP	scf_000001_A_fumigatus_A1163	2686908	2686909	G->A	Y	AFUB_009560	2686790	2687829	NA	Ortholog of A. nidulans FGSC A4 : AN3975, AN9193/llmJ, AN2891 and A. fumigatus Af293 : Afu2g04380, Afu3g15150, Afu3g15280, Afu6g03300
Small-scale	SNP	scf_000001_A_fumigatus_A1163	2695239	2695240	C->T	Y	AFUB_009600	2694512	2696071	NA	Ortholog(s) have role in mRNA cis splicing, via spliceosome and U4/U6 x U5 tri-snRNP complex localization
Small-scale	SNP	scf_000001_A_fumigatus_A1163	2697015	2697016	C->T	Y	AFUB_009610	2696251	2698701	NA	Ortholog(s) have Prp19 complex, spliceosomal complex localization
Small-scale	SNP	scf_000001_A_fumigatus_A1163	2708213	2708214	T->C	Y	AFUB_009650	2708005	2708265	NA	Ortholog of Aspergillus fumigatus A1163 : AFUB_009650
Small-scale	SNP	scf_000001_A_fumigatus_A1163	2717432	2717433	G->A	Y	AFUB_009670	2717425	2718153	NA	Ortholog of Aspergillus fumigatus A1163 : AFUB_009670
Small-scale	SNP	scf_000001_A_fumigatus_A1163	2718807	2718808	A->G	Y	AFUB_009680	2718674	2719912	NA	Ortholog(s) have pyridoxine:NADP 4-dehydrogenase activity, role in pyridoxal biosynthetic process and cytosol, extracellular region, nucleus localization
Small-scale	SNP	scf_000001_A_fumigatus_A1163	2725932	2725933	C->A	Y	AFUB_009705	2722080	2728091	NA	Ortholog(s) have ATP-dependent DNA helicase activity
Small-scale	SNP	scf_000001_A_fumigatus_A1163	2745121	2745122	G->A	Y	AFUB_009780	2742713	2745250	NA	Ortholog(s) have cytosol, nucleus localization
Small-scale	SNP	scf_000001_A_fumigatus_A1163	2773093	2773094	A->C	Y	AFUB_009810	2773054	2778775	abcB	Putative ABC multidrug transporter
Small-scale	SNP	scf_000001_A_fumigatus_A1163	2774899	2774900	G->A	Y	AFUB_009810	2773054	2778775	abcB	Putative ABC multidrug transporter
Small-scale	SNP	scf_000001_A_fumigatus_A1163	2777487	2777488	C->T	Y	AFUB_009810	2773054	2778775	abcB	Putative ABC multidrug transporter
Small-scale	SNP	scf_000001_A_fumigatus_A1163	2783392	2783393	T->C	Y	AFUB_009820	2778960	2783447	NA	Ortholog(s) have nuclear pore, spindle pole body localization
Small-scale	SNP	scf_000001_A_fumigatus_A1163	2786723	2786724	C->G	Y	AFUB_009840	2785490	2786829	NA	Ortholog of A. nidulans FGSC A4 : AN1236, A. niger CBS 513.88 : An08g02360, Neosartorya fischeri NRRL 181 : NFIA_015250, Aspergillus wentii : Aspwe1_0036579 and Aspergillus versicolor : Aspve1_0036917
Small-scale	SNP	scf_000001_A_fumigatus_A1163	2808890	2808891	T->G	Y	AFUB_009930	2808194	2809012	NA	Ortholog(s) have SNAP receptor activity, role in Golgi vesicle transport, vesicle fusion and Golgi medial cisterna, SNARE complex localization
Small-scale	SNP	scf_000001_A_fumigatus_A1163	2811576	2811577	G->A	Y	AFUB_009950	2810662	2813988	NA	Ortholog of A. nidulans FGSC A4 : AN1227, A. niger CBS 513.88 : An08g02480, A. oryzae RIB40 : AO090138000217, Aspergillus wentii : Aspwe1_0127770 and Aspergillus sydowii : Aspsy1_0083509
Small-scale	SNP	scf_000001_A_fumigatus_A1163	2811579	2811580	A->G	Y	AFUB_009950	2810662	2813988	NA	Ortholog of A. nidulans FGSC A4 : AN1227, A. niger CBS 513.88 : An08g02480, A. oryzae RIB40 : AO090138000217, Aspergillus wentii : Aspwe1_0127770 and Aspergillus sydowii : Aspsy1_0083509
Small-scale	SNP	scf_000001_A_fumigatus_A1163	2819923	2819924	G->A	Y	AFUB_009980	2819721	2821806	NA	Ortholog(s) have role in positive regulation of growth rate, rRNA processing, response to drug, ribosomal subunit export from nucleus and nucleolus localization
Small-scale	SNP	scf_000001_A_fumigatus_A1163	2821378	2821379	G->A	Y	AFUB_009980	2819721	2821806	NA	Ortholog(s) have role in positive regulation of growth rate, rRNA processing, response to drug, ribosomal subunit export from nucleus and nucleolus localization
Small-scale	SNP	scf_000001_A_fumigatus_A1163	2821386	2821387	G->T	Y	AFUB_009980	2819721	2821806	NA	Ortholog(s) have role in positive regulation of growth rate, rRNA processing, response to drug, ribosomal subunit export from nucleus and nucleolus localization
Small-scale	SNP	scf_000001_A_fumigatus_A1163	2832433	2832434	C->G	Y	AFUB_010010	2832123	2833381	NA	Putative GPI anchored protein
Small-scale	SNP	scf_000001_A_fumigatus_A1163	2833225	2833226	A->G	Y	AFUB_010010	2832123	2833381	NA	Putative GPI anchored protein
Small-scale	SNP	scf_000001_A_fumigatus_A1163	2845408	2845409	A->G	Y	AFUB_010040	2844100	2847011	NA	Ortholog of A. nidulans FGSC A4 : AN1221, A. niger CBS 513.88 : An08g02680, A. oryzae RIB40 : AO090038000358, Aspergillus wentii : Aspwe1_0049022 and Aspergillus sydowii : Aspsy1_0139464
Small-scale	SNP	scf_000001_A_fumigatus_A1163	2852058	2852059	T->C	Y	AFUB_010080	2852053	2855793	NA	Ortholog of A. nidulans FGSC A4 : AN1213, A. niger CBS 513.88 : An08g02730, A. oryzae RIB40 : AO090038000354, Neosartorya fischeri NRRL 181 : NFIA_014990 and Aspergillus versicolor : Aspve1_0119055
Small-scale	SNP	scf_000001_A_fumigatus_A1163	2864416	2864417	A->G	Y	AFUB_010110	2862774	2865526	NA	Ortholog(s) have cytosol localization
Small-scale	SNP	scf_000001_A_fumigatus_A1163	2869895	2869896	T->A	Y	AFUB_010140	2868968	2871522	NA	Ortholog(s) have DNA replication origin binding activity, role in mitotic DNA replication, mitotic DNA replication checkpoint and nuclear chromatin, nuclear origin of replication recognition complex localization
Small-scale	SNP	scf_000001_A_fumigatus_A1163	2874009	2874010	T->C	Y	AFUB_010150	2872582	2875203	NA	Ortholog of A. niger CBS 513.88 : An08g02820, Aspergillus wentii : Aspwe1_0180394, Aspergillus sydowii : Aspsy1_0190859 and Aspergillus terreus NIH2624 : ATET_00264
Small-scale	SNP	scf_000001_A_fumigatus_A1163	2874010	2874011	T->C	Y	AFUB_010150	2872582	2875203	NA	Ortholog of A. niger CBS 513.88 : An08g02820, Aspergillus wentii : Aspwe1_0180394, Aspergillus sydowii : Aspsy1_0190859 and Aspergillus terreus NIH2624 : ATET_00264
Small-scale	SNP	scf_000001_A_fumigatus_A1163	2874024	2874025	G->A	Y	AFUB_010150	2872582	2875203	NA	Ortholog of A. niger CBS 513.88 : An08g02820, Aspergillus wentii : Aspwe1_0180394, Aspergillus sydowii : Aspsy1_0190859 and Aspergillus terreus NIH2624 : ATET_00264
Small-scale	SNP	scf_000001_A_fumigatus_A1163	2876404	2876405	G->A	Y	AFUB_010160	2875414	2876570	NA	Ortholog(s) have tubulin binding activity and role in positive regulation of transcription elongation from RNA polymerase II promoter, regulation of conjugation with cellular fusion, tubulin complex assembly
Small-scale	SNP	scf_000001_A_fumigatus_A1163	2877761	2877762	C->T	Y	AFUB_010170	2876714	2879182	NA	Ortholog(s) have mitochondrion localization
Small-scale	SNP	scf_000001_A_fumigatus_A1163	2891043	2891044	A->G	Y	AFUB_010210	2888525	2892022	NA	Putative alpha-1,2-mannosidase family protein
Small-scale	SNP	scf_000001_A_fumigatus_A1163	2892922	2892923	A->G	Y	AFUB_010220	2892150	2893743	NA	Thioesterase family protein
Small-scale	SNP	scf_000001_A_fumigatus_A1163	2917080	2917081	G->A	Y	AFUB_010310	2916631	2918409	NA	Has domain(s) with predicted nucleobase transmembrane transporter activity, role in nucleobase transport, transmembrane transport and membrane localization
Small-scale	SNP	scf_000001_A_fumigatus_A1163	2917086	2917087	A->C	Y	AFUB_010310	2916631	2918409	NA	Has domain(s) with predicted nucleobase transmembrane transporter activity, role in nucleobase transport, transmembrane transport and membrane localization
Small-scale	SNP	scf_000001_A_fumigatus_A1163	2924069	2924070	A->C	Y	AFUB_010340	2923595	2925633	NA	Ortholog(s) have U2 snRNP, U2-type spliceosomal complex localization
Small-scale	SNP	scf_000001_A_fumigatus_A1163	2936303	2936304	A->G	Y	AFUB_010370	2935868	2937248	NA	Ortholog(s) have role in negative regulation of gluconeogenesis, proteasome-mediated ubiquitin-dependent protein catabolic process, protein catabolic process in the vacuole, protein targeting to vacuole
Small-scale	SNP	scf_000001_A_fumigatus_A1163	2942759	2942760	G->A	Y	AFUB_010400	2942744	2944504	NA	Ortholog(s) have D-erythro-sphingosine kinase activity, role in calcium-mediated signaling, response to heat, sphingolipid metabolic process and Golgi apparatus, membrane localization
Small-scale	SNP	scf_000001_A_fumigatus_A1163	2951614	2951615	A->C	Y	AFUB_010420	2951106	2954096	NA	Ortholog(s) have role in galactose catabolic process
Small-scale	SNP	scf_000001_A_fumigatus_A1163	2955175	2955176	T->C	Y	AFUB_010430	2955043	2955896	NA	Ortholog(s) have versicolorin reductase activity and role in monodictyphenone biosynthetic process, sterigmatocystin biosynthetic process, xanthone-containing compound biosynthetic process
Small-scale	SNP	scf_000001_A_fumigatus_A1163	2957176	2957177	C->T	Y	AFUB_010440	2956182	2957377	NA	Ortholog(s) have role in galactitol catabolic process, galactose catabolic process
Small-scale	SNP	scf_000001_A_fumigatus_A1163	2957186	2957187	T->G	Y	AFUB_010440	2956182	2957377	NA	Ortholog(s) have role in galactitol catabolic process, galactose catabolic process
Small-scale	SNP	scf_000001_A_fumigatus_A1163	2957208	2957209	C->T	Y	AFUB_010440	2956182	2957377	NA	Ortholog(s) have role in galactitol catabolic process, galactose catabolic process
Small-scale	SNP	scf_000001_A_fumigatus_A1163	2961559	2961560	A->G	Y	AFUB_010460	2961532	2962439	NA	Ortholog of A. nidulans FGSC A4 : AN10896, A. niger CBS 513.88 : An09g03860, An09g00570, A. oryzae RIB40 : AO090113000167 and Aspergillus wentii : Aspwe1_0137373, Aspwe1_0169359
Small-scale	SNP	scf_000001_A_fumigatus_A1163	2961745	2961746	C->G	Y	AFUB_010460	2961532	2962439	NA	Ortholog of A. nidulans FGSC A4 : AN10896, A. niger CBS 513.88 : An09g03860, An09g00570, A. oryzae RIB40 : AO090113000167 and Aspergillus wentii : Aspwe1_0137373, Aspwe1_0169359
Small-scale	SNP	scf_000001_A_fumigatus_A1163	2964055	2964056	A->G	Y	AFUB_010470	2963924	2965911	NA	Has domain(s) with predicted substrate-specific transmembrane transporter activity, transmembrane transporter activity, role in transmembrane transport and integral component of membrane, membrane localization
Small-scale	SNP	scf_000001_A_fumigatus_A1163	2964355	2964356	C->T	Y	AFUB_010470	2963924	2965911	NA	Has domain(s) with predicted substrate-specific transmembrane transporter activity, transmembrane transporter activity, role in transmembrane transport and integral component of membrane, membrane localization
Small-scale	SNP	scf_000001_A_fumigatus_A1163	2964621	2964622	G->C	Y	AFUB_010470	2963924	2965911	NA	Has domain(s) with predicted substrate-specific transmembrane transporter activity, transmembrane transporter activity, role in transmembrane transport and integral component of membrane, membrane localization
Small-scale	SNP	scf_000001_A_fumigatus_A1163	2965449	2965450	T->C	Y	AFUB_010470	2963924	2965911	NA	Has domain(s) with predicted substrate-specific transmembrane transporter activity, transmembrane transporter activity, role in transmembrane transport and integral component of membrane, membrane localization
Small-scale	SNP	scf_000001_A_fumigatus_A1163	2977998	2977999	T->A	Y	AFUB_010500	2977779	2980758	NA	Ortholog(s) have cytosol, nucleus localization
Small-scale	SNP	scf_000001_A_fumigatus_A1163	2978226	2978227	C->T	Y	AFUB_010500	2977779	2980758	NA	Ortholog(s) have cytosol, nucleus localization
Small-scale	SNP	scf_000001_A_fumigatus_A1163	2979588	2979589	T->C	Y	AFUB_010500	2977779	2980758	NA	Ortholog(s) have cytosol, nucleus localization
Small-scale	SNP	scf_000001_A_fumigatus_A1163	2979648	2979649	C->G	Y	AFUB_010500	2977779	2980758	NA	Ortholog(s) have cytosol, nucleus localization
Small-scale	SNP	scf_000001_A_fumigatus_A1163	2989253	2989254	C->G	Y	AFUB_010530	2989166	2989690	NA	Ortholog of A. nidulans FGSC A4 : AN1169, A. niger CBS 513.88 : An08g03390, A. oryzae RIB40 : AO090038000299, Neosartorya fischeri NRRL 181 : NFIA_014530 and Aspergillus wentii : Aspwe1_0172243
Small-scale	SNP	scf_000001_A_fumigatus_A1163	2991021	2991022	C->T	Y	AFUB_010540	2990851	2997891	cch1	Putative voltage-gated calcium channel
Small-scale	SNP	scf_000001_A_fumigatus_A1163	2991048	2991049	A->C	Y	AFUB_010540	2990851	2997891	cch1	Putative voltage-gated calcium channel
Small-scale	SNP	scf_000001_A_fumigatus_A1163	2995824	2995825	A->G	Y	AFUB_010540	2990851	2997891	cch1	Putative voltage-gated calcium channel
Small-scale	SNP	scf_000001_A_fumigatus_A1163	2996120	2996121	A->G	Y	AFUB_010540	2990851	2997891	cch1	Putative voltage-gated calcium channel
Small-scale	SNP	scf_000001_A_fumigatus_A1163	2999106	2999107	T->G	Y	AFUB_010550	2998469	3000302	NA	Has domain(s) with predicted cytoplasm, nucleus localization
Small-scale	SNP	scf_000001_A_fumigatus_A1163	3013232	3013233	T->C	Y	AFUB_010610	3011805	3014631	hsp78	Heat shock protein/chaperonin
Small-scale	SNP	scf_000001_A_fumigatus_A1163	3013283	3013284	A->T	Y	AFUB_010610	3011805	3014631	hsp78	Heat shock protein/chaperonin
Small-scale	SNP	scf_000001_A_fumigatus_A1163	3015229	3015230	T->C	Y	AFUB_010620	3014759	3016190	NA	Putative eukaryotic translation elongation factor 1 subunit eEF1-beta
Small-scale	SNP	scf_000001_A_fumigatus_A1163	3029287	3029288	T->G	Y	AFUB_010660	3029252	3032629	hmg2	Hydroxymethylglutaryl-CoA (HMG-CoA) reductase
Small-scale	SNP	scf_000001_A_fumigatus_A1163	3029508	3029509	G->A	Y	AFUB_010660	3029252	3032629	hmg2	Hydroxymethylglutaryl-CoA (HMG-CoA) reductase
Small-scale	SNP	scf_000001_A_fumigatus_A1163	3029833	3029834	T->C	Y	AFUB_010660	3029252	3032629	hmg2	Hydroxymethylglutaryl-CoA (HMG-CoA) reductase
Small-scale	SNP	scf_000001_A_fumigatus_A1163	3030023	3030024	T->C	Y	AFUB_010660	3029252	3032629	hmg2	Hydroxymethylglutaryl-CoA (HMG-CoA) reductase
Small-scale	SNP	scf_000001_A_fumigatus_A1163	3037499	3037500	A->C	Y	AFUB_010680	3037466	3039024	NA	Putative amidohydrolase
Small-scale	SNP	scf_000001_A_fumigatus_A1163	3038140	3038141	A->C	Y	AFUB_010680	3037466	3039024	NA	Putative amidohydrolase
Small-scale	SNP	scf_000001_A_fumigatus_A1163	3043655	3043656	A->G	Y	AFUB_010710	3043349	3044496	NA	Has domain(s) with predicted iron ion binding, oxidoreductase activity, oxidoreductase activity, acting on paired donors, with incorporation or reduction of molecular oxygen and 2-oxoglutarate as one donor, more
Small-scale	SNP	scf_000001_A_fumigatus_A1163	3050219	3050220	G->A	Y	AFUB_010740	3049718	3051773	NA	Has domain(s) with predicted catalytic activity and role in metabolic process
Small-scale	SNP	scf_000001_A_fumigatus_A1163	3051584	3051585	T->C	Y	AFUB_010740	3049718	3051773	NA	Has domain(s) with predicted catalytic activity and role in metabolic process
Small-scale	SNP	scf_000001_A_fumigatus_A1163	3054824	3054825	C->T	Y	AFUB_010760	3054735	3056063	NA	Ortholog(s) have extracellular region localization
Small-scale	SNP	scf_000001_A_fumigatus_A1163	3055151	3055152	T->C	Y	AFUB_010760	3054735	3056063	NA	Ortholog(s) have extracellular region localization
Small-scale	SNP	scf_000001_A_fumigatus_A1163	3070202	3070203	A->C	Y	AFUB_010820	3068392	3070350	NA	Has domain(s) with predicted electron carrier activity, heme binding, iron ion binding, oxidoreductase activity, acting on paired donors, with incorporation or reduction of molecular oxygen activity and role in oxidation-reduction process
Small-scale	SNP	scf_000001_A_fumigatus_A1163	3072526	3072527	G->A	Y	AFUB_010840	3072157	3073505	NA	Has domain(s) with predicted acid-amino acid ligase activity
Small-scale	SNP	scf_000001_A_fumigatus_A1163	3078922	3078923	A->C	Y	AFUB_010860	3078788	3079191	NA	Ortholog of Aspergillus fumigatus A1163 : AFUB_010860
Small-scale	SNP	scf_000001_A_fumigatus_A1163	3081607	3081608	C->T	Y	AFUB_010870	3081519	3084040	NA	Ortholog(s) have nuclear pore localization
Small-scale	SNP	scf_000001_A_fumigatus_A1163	3083020	3083021	C->T	Y	AFUB_010870	3081519	3084040	NA	Ortholog(s) have nuclear pore localization
Small-scale	SNP	scf_000001_A_fumigatus_A1163	3090048	3090049	G->A	Y	AFUB_010880	3084293	3091571	NA	Ortholog of A. nidulans FGSC A4 : AN1156, A. niger CBS 513.88 : An08g03570, A. oryzae RIB40 : AO090038000280, Aspergillus wentii : Aspwe1_0068767 and Aspergillus sydowii : Aspsy1_0191007
Small-scale	SNP	scf_000001_A_fumigatus_A1163	3090589	3090590	C->T	Y	AFUB_010880	3084293	3091571	NA	Ortholog of A. nidulans FGSC A4 : AN1156, A. niger CBS 513.88 : An08g03570, A. oryzae RIB40 : AO090038000280, Aspergillus wentii : Aspwe1_0068767 and Aspergillus sydowii : Aspsy1_0191007
Small-scale	SNP	scf_000001_A_fumigatus_A1163	3090591	3090592	A->G	Y	AFUB_010880	3084293	3091571	NA	Ortholog of A. nidulans FGSC A4 : AN1156, A. niger CBS 513.88 : An08g03570, A. oryzae RIB40 : AO090038000280, Aspergillus wentii : Aspwe1_0068767 and Aspergillus sydowii : Aspsy1_0191007
Small-scale	SNP	scf_000001_A_fumigatus_A1163	3094076	3094077	G->A	Y	AFUB_010890	3092901	3094531	bgt1	Putative 1,3-beta-glucanosyltransferase
Small-scale	SNP	scf_000001_A_fumigatus_A1163	3097480	3097481	C->T	Y	AFUB_010900	3096711	3098114	NA	Ortholog(s) have role in ER to Golgi vesicle-mediated transport, protein retention in ER lumen, vesicle organization and ER to Golgi transport vesicle, endoplasmic reticulum, plasma membrane localization
Small-scale	SNP	scf_000001_A_fumigatus_A1163	3100643	3100644	A->C	Y	AFUB_010920	3100309	3103323	NA	Ortholog(s) have endopolyphosphatase activity, exopolyphosphatase activity, role in polyphosphate catabolic process and cytosol, fungal-type vacuole membrane, nucleus localization
Small-scale	SNP	scf_000001_A_fumigatus_A1163	3119853	3119854	G->A	Y	AFUB_011000	3118926	3120123	NA	Ortholog(s) have 3-dehydroshikimate dehydratase activity and role in quinate catabolic process
Small-scale	SNP	scf_000001_A_fumigatus_A1163	3120016	3120017	T->G	Y	AFUB_011000	3118926	3120123	NA	Ortholog(s) have 3-dehydroshikimate dehydratase activity and role in quinate catabolic process
Small-scale	SNP	scf_000001_A_fumigatus_A1163	3124829	3124830	A->G	Y	AFUB_011030	3124807	3125924	NA	Ortholog(s) have quinate 3-dehydrogenase (NAD+) activity, shikimate 3-dehydrogenase (NADP+) activity and role in quinate catabolic process
Small-scale	SNP	scf_000001_A_fumigatus_A1163	3129344	3129345	T->A	Y	AFUB_011060	3128445	3131705	NA	Ortholog(s) have sequence-specific DNA binding, transcription factor activity, sequence-specific DNA binding activity
Small-scale	SNP	scf_000001_A_fumigatus_A1163	3131113	3131114	G->T	Y	AFUB_011060	3128445	3131705	NA	Ortholog(s) have sequence-specific DNA binding, transcription factor activity, sequence-specific DNA binding activity
Small-scale	SNP	scf_000001_A_fumigatus_A1163	3131299	3131300	C->A	Y	AFUB_011060	3128445	3131705	NA	Ortholog(s) have sequence-specific DNA binding, transcription factor activity, sequence-specific DNA binding activity
Small-scale	SNP	scf_000001_A_fumigatus_A1163	3131317	3131318	A->C	Y	AFUB_011060	3128445	3131705	NA	Ortholog(s) have sequence-specific DNA binding, transcription factor activity, sequence-specific DNA binding activity
Small-scale	SNP	scf_000001_A_fumigatus_A1163	3133257	3133258	A->G	Y	AFUB_011070	3131836	3134930	NA	Ortholog(s) have role in negative regulation of transcription from RNA polymerase II promoter, quinate catabolic process
Small-scale	SNP	scf_000001_A_fumigatus_A1163	3133398	3133399	A->G	Y	AFUB_011070	3131836	3134930	NA	Ortholog(s) have role in negative regulation of transcription from RNA polymerase II promoter, quinate catabolic process
Small-scale	SNP	scf_000001_A_fumigatus_A1163	3135341	3135342	G->A	Y	AFUB_011080	3135141	3136012	NA	Ortholog(s) have copper ion binding, superoxide dismutase activity and role in cellular response to superoxide, evasion or tolerance by symbiont of host-produced reactive oxygen species, pathogenesis, superoxide metabolic process
Small-scale	SNP	scf_000001_A_fumigatus_A1163	3138664	3138665	C->A	Y	AFUB_011090	3137165	3139251	NA	Ortholog of A. nidulans FGSC A4 : AN1129, A. oryzae RIB40 : AO090038000256, Neosartorya fischeri NRRL 181 : NFIA_013890, Aspergillus wentii : Aspwe1_0040542 and Aspergillus versicolor : Aspve1_0288835
Small-scale	SNP	scf_000001_A_fumigatus_A1163	3139074	3139075	G->A	Y	AFUB_011090	3137165	3139251	NA	Ortholog of A. nidulans FGSC A4 : AN1129, A. oryzae RIB40 : AO090038000256, Neosartorya fischeri NRRL 181 : NFIA_013890, Aspergillus wentii : Aspwe1_0040542 and Aspergillus versicolor : Aspve1_0288835
Small-scale	SNP	scf_000001_A_fumigatus_A1163	3140037	3140038	A->C	Y	AFUB_011100	3139629	3142545	NA	Ortholog of A. nidulans FGSC A4 : AN1128, A. niger CBS 513.88 : An08g03710, A. oryzae RIB40 : AO090038000255, Aspergillus wentii : Aspwe1_0051424 and Aspergillus sydowii : Aspsy1_0141930
Small-scale	SNP	scf_000001_A_fumigatus_A1163	3141810	3141811	G->C	Y	AFUB_011100	3139629	3142545	NA	Ortholog of A. nidulans FGSC A4 : AN1128, A. niger CBS 513.88 : An08g03710, A. oryzae RIB40 : AO090038000255, Aspergillus wentii : Aspwe1_0051424 and Aspergillus sydowii : Aspsy1_0141930
Small-scale	SNP	scf_000001_A_fumigatus_A1163	3142529	3142530	T->C	Y	AFUB_011100	3139629	3142545	NA	Ortholog of A. nidulans FGSC A4 : AN1128, A. niger CBS 513.88 : An08g03710, A. oryzae RIB40 : AO090038000255, Aspergillus wentii : Aspwe1_0051424 and Aspergillus sydowii : Aspsy1_0141930
Small-scale	SNP	scf_000001_A_fumigatus_A1163	3143182	3143183	C->A	Y	AFUB_011110	3142820	3144207	NA	Ortholog(s) have nucleus localization
Small-scale	SNP	scf_000001_A_fumigatus_A1163	3143415	3143416	G->A	Y	AFUB_011110	3142820	3144207	NA	Ortholog(s) have nucleus localization
Small-scale	SNP	scf_000001_A_fumigatus_A1163	3144958	3144959	A->G	Y	AFUB_011120	3144334	3146143	NA	Ortholog(s) have role in actin cortical patch assembly, actin nucleation, positive regulation of actin nucleation and actin cortical patch, cytosol, medial cortex, nucleus, old growing cell tip localization
Small-scale	SNP	scf_000001_A_fumigatus_A1163	3145260	3145261	C->T	Y	AFUB_011120	3144334	3146143	NA	Ortholog(s) have role in actin cortical patch assembly, actin nucleation, positive regulation of actin nucleation and actin cortical patch, cytosol, medial cortex, nucleus, old growing cell tip localization
Small-scale	SNP	scf_000001_A_fumigatus_A1163	3146130	3146131	A->C	Y	AFUB_011120	3144334	3146143	NA	Ortholog(s) have role in actin cortical patch assembly, actin nucleation, positive regulation of actin nucleation and actin cortical patch, cytosol, medial cortex, nucleus, old growing cell tip localization
Small-scale	SNP	scf_000001_A_fumigatus_A1163	3147415	3147416	T->C	Y	AFUB_011130	3146291	3147568	NA	Ortholog of A. nidulans FGSC A4 : AN1121, A. niger CBS 513.88 : An08g03920, A. oryzae RIB40 : AO090038000248, Aspergillus wentii : Aspwe1_0068693 and Aspergillus sydowii : Aspsy1_0038144
Small-scale	SNP	scf_000001_A_fumigatus_A1163	3148100	3148101	A->T	Y	AFUB_011140	3147822	3148845	NA	Ribosomal protein L1
Small-scale	SNP	scf_000001_A_fumigatus_A1163	3149853	3149854	G->A	Y	AFUB_011150	3149811	3150711	NA	Ortholog of Neosartorya fischeri NRRL 181 : NFIA_013830, Aspergillus fumigatus A1163 : AFUB_011150 and Aspergillus clavatus NRRL 1 : ACLA_023930
Small-scale	SNP	scf_000001_A_fumigatus_A1163	3150047	3150048	T->C	Y	AFUB_011150	3149811	3150711	NA	Ortholog of Neosartorya fischeri NRRL 181 : NFIA_013830, Aspergillus fumigatus A1163 : AFUB_011150 and Aspergillus clavatus NRRL 1 : ACLA_023930
Small-scale	SNP	scf_000001_A_fumigatus_A1163	3150059	3150060	C->T	Y	AFUB_011150	3149811	3150711	NA	Ortholog of Neosartorya fischeri NRRL 181 : NFIA_013830, Aspergillus fumigatus A1163 : AFUB_011150 and Aspergillus clavatus NRRL 1 : ACLA_023930
Small-scale	SNP	scf_000001_A_fumigatus_A1163	3150407	3150408	G->C	Y	AFUB_011150	3149811	3150711	NA	Ortholog of Neosartorya fischeri NRRL 181 : NFIA_013830, Aspergillus fumigatus A1163 : AFUB_011150 and Aspergillus clavatus NRRL 1 : ACLA_023930
Small-scale	SNP	scf_000001_A_fumigatus_A1163	3150412	3150413	T->C	Y	AFUB_011150	3149811	3150711	NA	Ortholog of Neosartorya fischeri NRRL 181 : NFIA_013830, Aspergillus fumigatus A1163 : AFUB_011150 and Aspergillus clavatus NRRL 1 : ACLA_023930
Small-scale	SNP	scf_000001_A_fumigatus_A1163	3151762	3151763	A->C	Y	AFUB_011160	3151634	3153734	NA	Ortholog(s) have extracellular region localization
Small-scale	SNP	scf_000001_A_fumigatus_A1163	3153104	3153105	T->C	Y	AFUB_011160	3151634	3153734	NA	Ortholog(s) have extracellular region localization
Small-scale	SNP	scf_000001_A_fumigatus_A1163	3153117	3153118	G->A	Y	AFUB_011160	3151634	3153734	NA	Ortholog(s) have extracellular region localization
Small-scale	SNP	scf_000001_A_fumigatus_A1163	3153220	3153221	A->T	Y	AFUB_011160	3151634	3153734	NA	Ortholog(s) have extracellular region localization
Small-scale	SNP	scf_000001_A_fumigatus_A1163	3154952	3154953	A->G	Y	AFUB_011170	3154333	3155910	NA	Ortholog(s) have GTPase activity, role in ER to Golgi vesicle-mediated transport, Golgi to plasma membrane transport, cellular response to drug, macroautophagy and Golgi apparatus, glyoxysome localization
Small-scale	SNP	scf_000001_A_fumigatus_A1163	3155040	3155041	T->C	Y	AFUB_011170	3154333	3155910	NA	Ortholog(s) have GTPase activity, role in ER to Golgi vesicle-mediated transport, Golgi to plasma membrane transport, cellular response to drug, macroautophagy and Golgi apparatus, glyoxysome localization
Small-scale	SNP	scf_000001_A_fumigatus_A1163	3155237	3155238	C->T	Y	AFUB_011170	3154333	3155910	NA	Ortholog(s) have GTPase activity, role in ER to Golgi vesicle-mediated transport, Golgi to plasma membrane transport, cellular response to drug, macroautophagy and Golgi apparatus, glyoxysome localization
Small-scale	SNP	scf_000001_A_fumigatus_A1163	3160430	3160431	T->A	Y	AFUB_011200	3159756	3160976	NA	Ortholog of A. nidulans FGSC A4 : AN1118, A. niger CBS 513.88 : An08g03950, A. oryzae RIB40 : AO090038000245, Aspergillus wentii : Aspwe1_0172137 and Aspergillus sydowii : Aspsy1_0083626
Small-scale	SNP	scf_000001_A_fumigatus_A1163	3160435	3160436	C->G	Y	AFUB_011200	3159756	3160976	NA	Ortholog of A. nidulans FGSC A4 : AN1118, A. niger CBS 513.88 : An08g03950, A. oryzae RIB40 : AO090038000245, Aspergillus wentii : Aspwe1_0172137 and Aspergillus sydowii : Aspsy1_0083626
Small-scale	SNP	scf_000001_A_fumigatus_A1163	3160454	3160455	G->A	Y	AFUB_011200	3159756	3160976	NA	Ortholog of A. nidulans FGSC A4 : AN1118, A. niger CBS 513.88 : An08g03950, A. oryzae RIB40 : AO090038000245, Aspergillus wentii : Aspwe1_0172137 and Aspergillus sydowii : Aspsy1_0083626
Small-scale	SNP	scf_000001_A_fumigatus_A1163	3160793	3160794	A->G	Y	AFUB_011200	3159756	3160976	NA	Ortholog of A. nidulans FGSC A4 : AN1118, A. niger CBS 513.88 : An08g03950, A. oryzae RIB40 : AO090038000245, Aspergillus wentii : Aspwe1_0172137 and Aspergillus sydowii : Aspsy1_0083626
Small-scale	SNP	scf_000001_A_fumigatus_A1163	3162510	3162511	G->A	Y	AFUB_011210	3161676	3163640	NA	Ortholog(s) have COPII adaptor activity, role in ER to Golgi vesicle-mediated transport and ER to Golgi transport vesicle, Golgi apparatus, endoplasmic reticulum, plasma membrane localization
Small-scale	SNP	scf_000001_A_fumigatus_A1163	3163550	3163551	A->G	Y	AFUB_011210	3161676	3163640	NA	Ortholog(s) have COPII adaptor activity, role in ER to Golgi vesicle-mediated transport and ER to Golgi transport vesicle, Golgi apparatus, endoplasmic reticulum, plasma membrane localization
Small-scale	SNP	scf_000001_A_fumigatus_A1163	3164666	3164667	A->T	Y	AFUB_011220	3164485	3166922	NA	Ortholog of A. nidulans FGSC A4 : AN1116, A. niger CBS 513.88 : An08g03970, A. oryzae RIB40 : AO090038000243, Aspergillus wentii : Aspwe1_0109813 and Aspergillus sydowii : Aspsy1_0244584
Small-scale	SNP	scf_000001_A_fumigatus_A1163	3165029	3165030	C->A	Y	AFUB_011220	3164485	3166922	NA	Ortholog of A. nidulans FGSC A4 : AN1116, A. niger CBS 513.88 : An08g03970, A. oryzae RIB40 : AO090038000243, Aspergillus wentii : Aspwe1_0109813 and Aspergillus sydowii : Aspsy1_0244584
Small-scale	SNP	scf_000001_A_fumigatus_A1163	3165091	3165092	A->G	Y	AFUB_011220	3164485	3166922	NA	Ortholog of A. nidulans FGSC A4 : AN1116, A. niger CBS 513.88 : An08g03970, A. oryzae RIB40 : AO090038000243, Aspergillus wentii : Aspwe1_0109813 and Aspergillus sydowii : Aspsy1_0244584
Small-scale	SNP	scf_000001_A_fumigatus_A1163	3172239	3172240	A->G	Y	AFUB_011240	3170689	3172658	NA	Has domain(s) with predicted protein dimerization activity
Small-scale	SNP	scf_000001_A_fumigatus_A1163	3177095	3177096	T->C	Y	AFUB_011260	3176301	3178422	NA	Ortholog of A. nidulans FGSC A4 : AN10167, A. niger CBS 513.88 : An08g04030, A. oryzae RIB40 : AO090001000386, Aspergillus wentii : Aspwe1_0040524 and Aspergillus carbonarius ITEM 5010 : Acar5010_503165
Small-scale	SNP	scf_000001_A_fumigatus_A1163	3181413	3181414	G->A	Y	AFUB_011280	3181206	3183869	qutD	MFS quinate transporter
Small-scale	SNP	scf_000001_A_fumigatus_A1163	3183669	3183670	G->A	Y	AFUB_011280	3181206	3183869	qutD	MFS quinate transporter
Small-scale	SNP	scf_000001_A_fumigatus_A1163	3192181	3192182	T->C	Y	AFUB_011320	3190440	3192561	NA	Ortholog(s) have ADP binding, metalloendopeptidase activity, peptidase activity, role in protein processing involved in protein targeting to mitochondrion and mitochondrial processing peptidase complex localization
Small-scale	SNP	scf_000001_A_fumigatus_A1163	3223543	3223544	A->T	Y	AFUB_011400	3221948	3224995	NA	Has domain(s) with predicted protein kinase binding activity and role in regulation of cyclin-dependent protein serine/threonine kinase activity
Small-scale	SNP	scf_000001_A_fumigatus_A1163	3226187	3226188	G->A	Y	AFUB_011410	3225800	3229098	NA	Ortholog(s) have role in regulation of reactive oxygen species metabolic process and mitochondrial membrane, plasma membrane localization
Small-scale	SNP	scf_000001_A_fumigatus_A1163	3232208	3232209	A->T	Y	AFUB_011420	3229140	3232381	NA	Ortholog(s) have role in mitochondrial fusion, mitochondrial genome maintenance and extrinsic component of mitochondrial inner membrane, fungal-type vacuole membrane localization
Small-scale	SNP	scf_000001_A_fumigatus_A1163	3233509	3233510	C->T	Y	AFUB_011430	3232501	3234259	NA	Ortholog(s) have gamma-glutamyltransferase activity, omega peptidase activity, role in glutathione catabolic process and cytoplasm, glutathione hydrolase complex localization
Small-scale	SNP	scf_000001_A_fumigatus_A1163	3236153	3236154	A->C	Y	AFUB_011450	3236140	3239224	NA	Ortholog(s) have mRNA binding, poly(U) RNA binding activity and role in nuclear-transcribed mRNA catabolic process, nonsense-mediated decay, regulation of mRNA stability, stress granule assembly
Small-scale	SNP	scf_000001_A_fumigatus_A1163	3240348	3240349	T->C	Y	AFUB_011460	3239361	3240862	NA	Ortholog of A. nidulans FGSC A4 : AN1090, A. oryzae RIB40 : AO090001000352, Aspergillus wentii : Aspwe1_0504431 and Aspergillus terreus NIH2624 : ATET_00399
Small-scale	SNP	scf_000001_A_fumigatus_A1163	3248538	3248539	C->G	Y	AFUB_011490	3248232	3249793	NA	Ortholog of A. nidulans FGSC A4 : AN1068, A. niger CBS 513.88 : An08g04360, A. oryzae RIB40 : AO090001000343, Aspergillus wentii : Aspwe1_0109513 and Aspergillus sydowii : Aspsy1_0251335
Small-scale	SNP	scf_000001_A_fumigatus_A1163	3273323	3273324	C->T	Y	AFUB_011590	3273234	3275770	NA	Ortholog of A. niger CBS 513.88 : An08g04420, A. oryzae RIB40 : AO090001000333, Aspergillus wentii : Aspwe1_0027928, Aspergillus sydowii : Aspsy1_0038224 and Aspergillus terreus NIH2624 : ATET_00411
Small-scale	SNP	scf_000001_A_fumigatus_A1163	3274504	3274505	G->A	Y	AFUB_011590	3273234	3275770	NA	Ortholog of A. niger CBS 513.88 : An08g04420, A. oryzae RIB40 : AO090001000333, Aspergillus wentii : Aspwe1_0027928, Aspergillus sydowii : Aspsy1_0038224 and Aspergillus terreus NIH2624 : ATET_00411
Small-scale	SNP	scf_000001_A_fumigatus_A1163	3279904	3279905	C->G	Y	AFUB_011620	3279048	3280675	NA	Ortholog(s) have guanosine-diphosphatase activity, uridine-diphosphatase activity
Small-scale	SNP	scf_000001_A_fumigatus_A1163	3285260	3285261	A->G	Y	AFUB_011650	3284739	3288162	NA	Ortholog(s) have GTPase activity, role in cellular response to drug, endoplasmic reticulum inheritance, endoplasmic reticulum membrane fusion, hexose transport, pathogenesis and cortical endoplasmic reticulum, cytosol localization
Small-scale	SNP	scf_000001_A_fumigatus_A1163	3286362	3286363	T->C	Y	AFUB_011650	3284739	3288162	NA	Ortholog(s) have GTPase activity, role in cellular response to drug, endoplasmic reticulum inheritance, endoplasmic reticulum membrane fusion, hexose transport, pathogenesis and cortical endoplasmic reticulum, cytosol localization
Small-scale	SNP	scf_000001_A_fumigatus_A1163	3287214	3287215	C->T	Y	AFUB_011650	3284739	3288162	NA	Ortholog(s) have GTPase activity, role in cellular response to drug, endoplasmic reticulum inheritance, endoplasmic reticulum membrane fusion, hexose transport, pathogenesis and cortical endoplasmic reticulum, cytosol localization
Small-scale	SNP	scf_000001_A_fumigatus_A1163	3293909	3293910	C->T	Y	AFUB_011680	3292182	3294328	NA	Putative NADH oxidase
Small-scale	SNP	scf_000001_A_fumigatus_A1163	3296850	3296851	A->C	Y	AFUB_011700	3295339	3296937	NA	Ortholog of A. oryzae RIB40 : AO090023000461, Neosartorya fischeri NRRL 181 : NFIA_013280, Aspergillus fumigatus A1163 : AFUB_011700 and Aspergillus clavatus NRRL 1 : ACLA_023230
Small-scale	SNP	scf_000001_A_fumigatus_A1163	3300295	3300296	C->T	Y	AFUB_011710	3299461	3302129	ptr2	Putative MFS peptide transporter
Small-scale	SNP	scf_000001_A_fumigatus_A1163	3307933	3307934	T->C	Y	AFUB_011750	3306907	3308400	NA	Ortholog(s) have nucleocytoplasmic transporter activity, structural constituent of nuclear pore activity and role in NLS-bearing protein import into nucleus, nuclear pore organization, protein targeting to nuclear inner membrane
Small-scale	SNP	scf_000001_A_fumigatus_A1163	3314417	3314418	T->C	Y	AFUB_011780	3312279	3314550	NA	Putative GABA permease
Small-scale	SNP	scf_000001_A_fumigatus_A1163	3327014	3327015	T->C	Y	AFUB_011810	3323734	3327083	NA	Putative carnitine acetyl transferase with a predicted role in acetate metabolism
Small-scale	SNP	scf_000001_A_fumigatus_A1163	3328655	3328656	C->T	Y	AFUB_011820	3328004	3330422	NA	Putative extracellular fruiting body protein
Small-scale	SNP	scf_000001_A_fumigatus_A1163	3328989	3328990	A->G	Y	AFUB_011820	3328004	3330422	NA	Putative extracellular fruiting body protein
Small-scale	SNP	scf_000001_A_fumigatus_A1163	3334227	3334228	G->A	Y	AFUB_011840	3332145	3335603	NA	Has domain(s) with predicted catalytic activity
Small-scale	SNP	scf_000001_A_fumigatus_A1163	3334803	3334804	A->C	Y	AFUB_011840	3332145	3335603	NA	Has domain(s) with predicted catalytic activity
Small-scale	SNP	scf_000001_A_fumigatus_A1163	3336550	3336551	G->A	Y	AFUB_011850	3335706	3337250	NA	Ortholog(s) have cytosol, nucleus localization
Small-scale	SNP	scf_000001_A_fumigatus_A1163	3341620	3341621	A->C	Y	AFUB_011870	3340780	3342190	NA	Has domain(s) with predicted arylformamidase activity and role in tryptophan catabolic process to kynurenine
Small-scale	SNP	scf_000001_A_fumigatus_A1163	3346728	3346729	A->G	Y	AFUB_011900	3346277	3346967	NA	Ortholog of Aspergillus fumigatus A1163 : AFUB_011900
Small-scale	SNP	scf_000001_A_fumigatus_A1163	3357130	3357131	T->C	Y	AFUB_011960	3356878	3359197	veA	sexual development regulator
Small-scale	SNP	scf_000001_A_fumigatus_A1163	3367033	3367034	T->G	Y	AFUB_011990	3365573	3367972	NA	Has domain(s) with predicted nucleoside-triphosphatase activity, nucleotide binding activity
Small-scale	SNP	scf_000001_A_fumigatus_A1163	3367326	3367327	G->T	Y	AFUB_011990	3365573	3367972	NA	Has domain(s) with predicted nucleoside-triphosphatase activity, nucleotide binding activity
Small-scale	SNP	scf_000001_A_fumigatus_A1163	3367559	3367560	G->A	Y	AFUB_011990	3365573	3367972	NA	Has domain(s) with predicted nucleoside-triphosphatase activity, nucleotide binding activity
Small-scale	SNP	scf_000001_A_fumigatus_A1163	3368384	3368385	T->C	Y	AFUB_012000	3368034	3371137	NA	Ortholog(s) have delta12-fatty acid dehydrogenase activity and role in asexual sporulation resulting in formation of a cellular spore, unsaturated fatty acid biosynthetic process
Small-scale	SNP	scf_000001_A_fumigatus_A1163	3374450	3374451	T->C	Y	AFUB_012010	3372585	3377416	NA	Ortholog(s) have TRAPPII protein complex localization
Small-scale	SNP	scf_000001_A_fumigatus_A1163	3374847	3374848	C->T	Y	AFUB_012010	3372585	3377416	NA	Ortholog(s) have TRAPPII protein complex localization
Small-scale	SNP	scf_000001_A_fumigatus_A1163	3388243	3388244	C->A	Y	AFUB_012030	3386805	3388372	NA	Putative endo-1,4-beta-glucanase
Small-scale	SNP	scf_000001_A_fumigatus_A1163	3440185	3440186	A->G	Y	AFUB_012230	3439656	3441924	capA	Adenylate cyclase-associated protein
Small-scale	SNP	scf_000001_A_fumigatus_A1163	3444954	3444955	A->G	Y	AFUB_012240	3442003	3445201	NA	Ortholog of A. nidulans FGSC A4 : AN1001, A. niger CBS 513.88 : An08g05540, A. oryzae RIB40 : AO090012000633, Aspergillus wentii : Aspwe1_0027882 and Aspergillus sydowii : Aspsy1_0191418
Small-scale	SNP	scf_000001_A_fumigatus_A1163	3445762	3445763	T->C	Y	AFUB_012250	3445564	3446264	NA	Ortholog of A. nidulans FGSC A4 : AN1000, A. niger CBS 513.88 : An08g05560, Aspergillus wentii : Aspwe1_0500525, Aspergillus sydowii : Aspsy1_0142138 and Aspergillus terreus NIH2624 : ATET_00472
Small-scale	SNP	scf_000001_A_fumigatus_A1163	3453270	3453271	A->G	Y	AFUB_012280	3452419	3453605	NA	Has domain(s) with predicted role in regulation of transcription, DNA-templated and H4/H2A histone acetyltransferase complex localization
Small-scale	SNP	scf_000001_A_fumigatus_A1163	3453938	3453939	G->A	Y	AFUB_012290	3453752	3456704	NA	Ortholog(s) have gamma-tubulin binding activity and spindle pole body localization
Small-scale	SNP	scf_000001_A_fumigatus_A1163	3458148	3458149	A->T	Y	AFUB_012300	3457079	3460023	niaD	Nitrate reductase
Small-scale	SNP	scf_000001_A_fumigatus_A1163	3464511	3464512	C->A	Y	AFUB_012310	3461252	3465032	niiA	Putative nitrite reductase
Small-scale	SNP	scf_000001_A_fumigatus_A1163	3468264	3468265	T->C	Y	AFUB_012320	3465594	3468661	crnA	Putative nitrate transporter
Small-scale	SNP	scf_000001_A_fumigatus_A1163	3470978	3470979	G->C	Y	AFUB_012340	3469871	3471537	NA	Ortholog of A. nidulans FGSC A4 : AN1010, A. niger CBS 513.88 : An08g05690, A. oryzae RIB40 : AO090012000621, Aspergillus wentii : Aspwe1_0027873 and Aspergillus sydowii : Aspsy1_0053360
Small-scale	SNP	scf_000001_A_fumigatus_A1163	3479904	3479905	G->A	Y	AFUB_012380	3477693	3482451	NA	Ortholog of A. nidulans FGSC A4 : AN10140, A. niger CBS 513.88 : An08g05760, A. oryzae RIB40 : AO090012000610, Aspergillus wentii : Aspwe1_0499968 and Aspergillus sydowii : Aspsy1_1154488
Small-scale	SNP	scf_000001_A_fumigatus_A1163	3480323	3480324	A->G	Y	AFUB_012380	3477693	3482451	NA	Ortholog of A. nidulans FGSC A4 : AN10140, A. niger CBS 513.88 : An08g05760, A. oryzae RIB40 : AO090012000610, Aspergillus wentii : Aspwe1_0499968 and Aspergillus sydowii : Aspsy1_1154488
Small-scale	SNP	scf_000001_A_fumigatus_A1163	3483531	3483532	T->C	Y	AFUB_012390	3482809	3485114	NA	Putative ABC fatty acid transporter
Small-scale	SNP	scf_000001_A_fumigatus_A1163	3504013	3504014	C->T	Y	AFUB_012440	3502282	3504924	NA	Ortholog(s) have role in SCF-dependent proteasomal ubiquitin-dependent protein catabolic process, negative regulation of mitotic DNA replication initiation and cytosol, nuclear SCF ubiquitin ligase complex localization
Small-scale	SNP	scf_000001_A_fumigatus_A1163	3522501	3522502	T->C	Y	AFUB_012510	3522204	3524310	NA	Ortholog of A. niger CBS 513.88 : An08g05960, A. oryzae RIB40 : AO090012000587, Neosartorya fischeri NRRL 181 : NFIA_012490 and Aspergillus wentii : Aspwe1_0172018
Small-scale	SNP	scf_000001_A_fumigatus_A1163	3523038	3523039	T->A	Y	AFUB_012510	3522204	3524310	NA	Ortholog of A. niger CBS 513.88 : An08g05960, A. oryzae RIB40 : AO090012000587, Neosartorya fischeri NRRL 181 : NFIA_012490 and Aspergillus wentii : Aspwe1_0172018
Small-scale	SNP	scf_000001_A_fumigatus_A1163	3530606	3530607	T->G	Y	AFUB_012540	3530558	3535201	NA	Ortholog(s) have role in circadian rhythm, hyphal growth, regulation of mRNA stability involved in response to oxidative stress and cytosol localization
Small-scale	SNP	scf_000001_A_fumigatus_A1163	3541297	3541298	T->C	Y	AFUB_012580	3541191	3546997	NA	Putative essential gene
Small-scale	SNP	scf_000001_A_fumigatus_A1163	3546225	3546226	A->G	Y	AFUB_012580	3541191	3546997	NA	Putative essential gene
Small-scale	SNP	scf_000001_A_fumigatus_A1163	3547886	3547887	C->T	Y	AFUB_012590	3547289	3550027	NA	4-coumarate-CoA ligase
Small-scale	SNP	scf_000001_A_fumigatus_A1163	3547929	3547930	G->A	Y	AFUB_012590	3547289	3550027	NA	4-coumarate-CoA ligase
Small-scale	SNP	scf_000001_A_fumigatus_A1163	3548687	3548688	C->G	Y	AFUB_012590	3547289	3550027	NA	4-coumarate-CoA ligase
Small-scale	SNP	scf_000001_A_fumigatus_A1163	3553036	3553037	T->C	Y	AFUB_012610	3552184	3553363	NA	Ortholog of Neosartorya fischeri NRRL 181 : NFIA_012390, Aspergillus wentii : Aspwe1_0040367, Aspergillus versicolor : Aspve1_0036174 and Aspergillus clavatus NRRL 1 : ACLA_022340
Small-scale	SNP	scf_000001_A_fumigatus_A1163	3556263	3556264	C->T	Y	AFUB_012620	3554258	3556460	gpaA	G protein-coupled receptor alpha subunit
Small-scale	SNP	scf_000001_A_fumigatus_A1163	3563953	3563954	C->T	Y	AFUB_012650	3562271	3563959	NA	Ortholog(s) have role in cellular protein localization, septation initiation signaling and mitotic spindle pole body localization
Small-scale	SNP	scf_000001_A_fumigatus_A1163	3565345	3565346	T->C	Y	AFUB_012660	3564950	3566311	NA	Ortholog(s) have mitochondrial outer membrane localization
Small-scale	SNP	scf_000001_A_fumigatus_A1163	3565815	3565816	A->C	Y	AFUB_012660	3564950	3566311	NA	Ortholog(s) have mitochondrial outer membrane localization
Small-scale	SNP	scf_000001_A_fumigatus_A1163	3567848	3567849	G->C	Y	AFUB_012670	3567367	3568701	mac1	Copper-dependent transcription factor mac1
Small-scale	SNP	scf_000001_A_fumigatus_A1163	3573750	3573751	T->A	Y	AFUB_012690	3570231	3574790	NA	Ortholog of A. nidulans FGSC A4 : AN0659, A. niger CBS 513.88 : An08g06230, A. oryzae RIB40 : AO090012001040, Aspergillus wentii : Aspwe1_0051321 and Aspergillus sydowii : Aspsy1_0065853
Small-scale	SNP	scf_000001_A_fumigatus_A1163	3575908	3575909	T->C	Y	AFUB_012700	3575796	3577770	NA	Ortholog(s) have role in allantoin assimilation pathway, allantoin transport, uracil import across plasma membrane and Golgi apparatus localization
Small-scale	SNP	scf_000001_A_fumigatus_A1163	3575930	3575931	C->T	Y	AFUB_012700	3575796	3577770	NA	Ortholog(s) have role in allantoin assimilation pathway, allantoin transport, uracil import across plasma membrane and Golgi apparatus localization
Small-scale	SNP	scf_000001_A_fumigatus_A1163	3582901	3582902	C->G	Y	AFUB_012720	3580636	3583323	NA	Ortholog(s) have nucleotidyltransferase activity
Small-scale	SNP	scf_000001_A_fumigatus_A1163	3611691	3611692	A->C	Y	AFUB_012800	3609461	3612037	NA	Has domain(s) with predicted sequence-specific DNA binding, transcription factor activity, sequence-specific DNA binding activity and role in regulation of transcription, DNA-templated
Small-scale	SNP	scf_000001_A_fumigatus_A1163	3616937	3616938	G->T	Y	AFUB_012830	3616339	3617781	NA	Has domain(s) with predicted integral component of membrane localization
Small-scale	SNP	scf_000001_A_fumigatus_A1163	3620339	3620340	C->T	Y	AFUB_012840	3618626	3620936	NA	Putative transporter protein
Small-scale	SNP	scf_000001_A_fumigatus_A1163	3629224	3629225	C->T	Y	AFUB_012880	3627605	3629843	NA	Ortholog(s) have structural constituent of cytoskeleton activity
Small-scale	SNP	scf_000001_A_fumigatus_A1163	3647845	3647846	A->G	Y	AFUB_012940	3645178	3649193	NA	Ortholog of A. nidulans FGSC A4 : AN0684, A. niger CBS 513.88 : An08g06520, A. oryzae RIB40 : AO090012000535, Aspergillus wentii : Aspwe1_0171971 and Aspergillus sydowii : Aspsy1_0028405
Small-scale	SNP	scf_000001_A_fumigatus_A1163	3647955	3647956	G->C	Y	AFUB_012940	3645178	3649193	NA	Ortholog of A. nidulans FGSC A4 : AN0684, A. niger CBS 513.88 : An08g06520, A. oryzae RIB40 : AO090012000535, Aspergillus wentii : Aspwe1_0171971 and Aspergillus sydowii : Aspsy1_0028405
Small-scale	SNP	scf_000001_A_fumigatus_A1163	3649671	3649672	A->G	Y	AFUB_012950	3649495	3650904	NA	Ortholog(s) have rRNA (uridine-N3-)-methyltransferase activity, role in rRNA base methylation and cytoplasm localization
Small-scale	SNP	scf_000001_A_fumigatus_A1163	3649864	3649865	T->C	Y	AFUB_012950	3649495	3650904	NA	Ortholog(s) have rRNA (uridine-N3-)-methyltransferase activity, role in rRNA base methylation and cytoplasm localization
Small-scale	SNP	scf_000001_A_fumigatus_A1163	3650415	3650416	C->T	Y	AFUB_012950	3649495	3650904	NA	Ortholog(s) have rRNA (uridine-N3-)-methyltransferase activity, role in rRNA base methylation and cytoplasm localization
Small-scale	SNP	scf_000001_A_fumigatus_A1163	3652362	3652363	C->T	Y	AFUB_012970	3652235	3653196	NA	Ortholog(s) have ubiquinol-cytochrome-c reductase activity, role in aerobic respiration, mitochondrial electron transport, ubiquinol to cytochrome c and mitochondrial respiratory chain complex III, plasma membrane localization
Small-scale	SNP	scf_000001_A_fumigatus_A1163	3654872	3654873	C->T	Y	AFUB_012980	3654621	3656109	NA	Putative spermidine synthase
Small-scale	SNP	scf_000001_A_fumigatus_A1163	3660667	3660668	G->T	Y	AFUB_013000	3660491	3663941	facB	Putative C6 transcription factor with a predicted role in acetate metabolism
Small-scale	SNP	scf_000001_A_fumigatus_A1163	3660902	3660903	G->T	Y	AFUB_013000	3660491	3663941	facB	Putative C6 transcription factor with a predicted role in acetate metabolism
Small-scale	SNP	scf_000001_A_fumigatus_A1163	3661440	3661441	C->T	Y	AFUB_013000	3660491	3663941	facB	Putative C6 transcription factor with a predicted role in acetate metabolism
Small-scale	SNP	scf_000001_A_fumigatus_A1163	3667311	3667312	T->C	Y	AFUB_013010	3666127	3668195	NA	SET domain protein
Small-scale	SNP	scf_000001_A_fumigatus_A1163	3667820	3667821	A->G	Y	AFUB_013010	3666127	3668195	NA	SET domain protein
Small-scale	SNP	scf_000001_A_fumigatus_A1163	3673550	3673551	C->T	Y	AFUB_013050	3673003	3674785	NA	Protein of unknown function identified by mass spectrometry
Small-scale	SNP	scf_000001_A_fumigatus_A1163	3673896	3673897	A->G	Y	AFUB_013050	3673003	3674785	NA	Protein of unknown function identified by mass spectrometry
Small-scale	SNP	scf_000001_A_fumigatus_A1163	3677682	3677683	C->T	Y	AFUB_013060	3676706	3677967	NA	Ortholog(s) have box H/ACA snoRNA binding activity, role in rRNA pseudouridine synthesis, snRNA pseudouridine synthesis and box H/ACA snoRNP complex localization
Small-scale	SNP	scf_000001_A_fumigatus_A1163	3685201	3685202	G->C	Y	AFUB_013090	3684570	3687081	NA	Ortholog(s) have cyclin-dependent protein kinase activating kinase activity, cyclin-dependent protein serine/threonine kinase regulator activity, protein serine/threonine kinase activity
Small-scale	SNP	scf_000001_A_fumigatus_A1163	3685202	3685203	G->C	Y	AFUB_013090	3684570	3687081	NA	Ortholog(s) have cyclin-dependent protein kinase activating kinase activity, cyclin-dependent protein serine/threonine kinase regulator activity, protein serine/threonine kinase activity
Small-scale	SNP	scf_000001_A_fumigatus_A1163	3709724	3709725	C->T	Y	AFUB_013180	3705859	3710400	NA	Ortholog(s) have protein complex binding activity and role in cellular response to calcium ion, cellular response to zinc ion, early endosome to late endosome transport, regulation of protein complex assembly, vacuolar acidification
Small-scale	SNP	scf_000001_A_fumigatus_A1163	3712504	3712505	C->A	Y	AFUB_013190	3710458	3714447	NA	Ortholog of A. nidulans FGSC A4 : AN0704, A. niger CBS 513.88 : An08g06760, A. oryzae RIB40 : AO090012000507, Aspergillus wentii : Aspwe1_0027785 and Aspergillus sydowii : Aspsy1_0144836
Small-scale	SNP	scf_000001_A_fumigatus_A1163	3716832	3716833	G->A	Y	AFUB_013200	3715063	3718351	NA	Isoleucyl-tRNA synthetase, cytoplasmic
Small-scale	SNP	scf_000001_A_fumigatus_A1163	3718949	3718950	T->C	Y	AFUB_013210	3718539	3722252	NA	Ortholog(s) have role in ER to Golgi vesicle-mediated transport, Golgi vesicle docking, SNARE complex assembly and ER to Golgi transport vesicle membrane, Golgi membrane localization
Small-scale	SNP	scf_000001_A_fumigatus_A1163	3720054	3720055	C->T	Y	AFUB_013210	3718539	3722252	NA	Ortholog(s) have role in ER to Golgi vesicle-mediated transport, Golgi vesicle docking, SNARE complex assembly and ER to Golgi transport vesicle membrane, Golgi membrane localization
Small-scale	SNP	scf_000001_A_fumigatus_A1163	3721438	3721439	C->T	Y	AFUB_013210	3718539	3722252	NA	Ortholog(s) have role in ER to Golgi vesicle-mediated transport, Golgi vesicle docking, SNARE complex assembly and ER to Golgi transport vesicle membrane, Golgi membrane localization
Small-scale	SNP	scf_000001_A_fumigatus_A1163	3723026	3723027	A->G	Y	AFUB_013220	3722353	3726227	NA	Ortholog(s) have 5'-3' exoribonuclease activity, mRNA binding, microtubule binding, recombinase activity
Small-scale	SNP	scf_000001_A_fumigatus_A1163	3740290	3740291	C->T	Y	AFUB_013240	3736511	3740745	NA	C2H2 transcription factor
Small-scale	SNP	scf_000001_A_fumigatus_A1163	3744703	3744704	C->A	Y	AFUB_013250	3741190	3745116	NA	Ortholog of A. nidulans FGSC A4 : AN3530, AN2658, A. fumigatus Af293 : Afu4g00490, Afu4g14350, A. niger CBS 513.88 : An09g01580 and A. oryzae RIB40 : AO090166000071
Small-scale	SNP	scf_000001_A_fumigatus_A1163	3752253	3752254	C->T	Y	AFUB_013280	3751896	3755260	NA	MFS multidrug transporter
Small-scale	SNP	scf_000001_A_fumigatus_A1163	3763446	3763447	T->C	Y	AFUB_013310	3763319	3764448	NA	Ortholog of Aspergillus fumigatus A1163 : AFUB_013310
Small-scale	SNP	scf_000001_A_fumigatus_A1163	3775479	3775480	C->T	Y	AFUB_013370	3775049	3777064	NA	Has domain(s) with predicted snoRNA binding activity and role in ribosome biogenesis, snRNA pseudouridine synthesis
Small-scale	SNP	scf_000001_A_fumigatus_A1163	3775669	3775670	T->C	Y	AFUB_013370	3775049	3777064	NA	Has domain(s) with predicted snoRNA binding activity and role in ribosome biogenesis, snRNA pseudouridine synthesis
Small-scale	SNP	scf_000001_A_fumigatus_A1163	3775888	3775889	C->A	Y	AFUB_013370	3775049	3777064	NA	Has domain(s) with predicted snoRNA binding activity and role in ribosome biogenesis, snRNA pseudouridine synthesis
Small-scale	SNP	scf_000001_A_fumigatus_A1163	3775955	3775956	C->A	Y	AFUB_013370	3775049	3777064	NA	Has domain(s) with predicted snoRNA binding activity and role in ribosome biogenesis, snRNA pseudouridine synthesis
Small-scale	SNP	scf_000001_A_fumigatus_A1163	3776722	3776723	A->G	Y	AFUB_013370	3775049	3777064	NA	Has domain(s) with predicted snoRNA binding activity and role in ribosome biogenesis, snRNA pseudouridine synthesis
Small-scale	SNP	scf_000001_A_fumigatus_A1163	3776943	3776944	A->G	Y	AFUB_013370	3775049	3777064	NA	Has domain(s) with predicted snoRNA binding activity and role in ribosome biogenesis, snRNA pseudouridine synthesis
Small-scale	SNP	scf_000001_A_fumigatus_A1163	3776955	3776956	G->A	Y	AFUB_013370	3775049	3777064	NA	Has domain(s) with predicted snoRNA binding activity and role in ribosome biogenesis, snRNA pseudouridine synthesis
Small-scale	SNP	scf_000001_A_fumigatus_A1163	3780456	3780457	G->A	Y	AFUB_013390	3779391	3784907	NA	Ortholog(s) have role in mRNA export from nucleus and cytosol, nucleolus localization
Small-scale	SNP	scf_000001_A_fumigatus_A1163	3780465	3780466	T->G	Y	AFUB_013390	3779391	3784907	NA	Ortholog(s) have role in mRNA export from nucleus and cytosol, nucleolus localization
Small-scale	SNP	scf_000001_A_fumigatus_A1163	3780497	3780498	T->C	Y	AFUB_013390	3779391	3784907	NA	Ortholog(s) have role in mRNA export from nucleus and cytosol, nucleolus localization
Small-scale	SNP	scf_000001_A_fumigatus_A1163	3780644	3780645	G->A	Y	AFUB_013390	3779391	3784907	NA	Ortholog(s) have role in mRNA export from nucleus and cytosol, nucleolus localization
Small-scale	SNP	scf_000001_A_fumigatus_A1163	3781895	3781896	T->C	Y	AFUB_013390	3779391	3784907	NA	Ortholog(s) have role in mRNA export from nucleus and cytosol, nucleolus localization
Small-scale	SNP	scf_000001_A_fumigatus_A1163	3783171	3783172	C->T	Y	AFUB_013390	3779391	3784907	NA	Ortholog(s) have role in mRNA export from nucleus and cytosol, nucleolus localization
Small-scale	SNP	scf_000001_A_fumigatus_A1163	3784741	3784742	T->C	Y	AFUB_013390	3779391	3784907	NA	Ortholog(s) have role in mRNA export from nucleus and cytosol, nucleolus localization
Small-scale	SNP	scf_000001_A_fumigatus_A1163	3788706	3788707	T->C	Y	AFUB_013410	3787855	3793472	NA	Ortholog(s) have ribosomal large subunit binding, ubiquitin-protein transferase activity
Small-scale	SNP	scf_000001_A_fumigatus_A1163	3790615	3790616	C->T	Y	AFUB_013410	3787855	3793472	NA	Ortholog(s) have ribosomal large subunit binding, ubiquitin-protein transferase activity
Small-scale	SNP	scf_000001_A_fumigatus_A1163	3791706	3791707	G->A	Y	AFUB_013410	3787855	3793472	NA	Ortholog(s) have ribosomal large subunit binding, ubiquitin-protein transferase activity
Small-scale	SNP	scf_000001_A_fumigatus_A1163	3793007	3793008	T->C	Y	AFUB_013410	3787855	3793472	NA	Ortholog(s) have ribosomal large subunit binding, ubiquitin-protein transferase activity
Small-scale	SNP	scf_000001_A_fumigatus_A1163	3801032	3801033	T->G	Y	AFUB_013450	3800172	3801835	NA	Ortholog(s) have role in late endosome to vacuole transport via multivesicular body sorting pathway and endosome localization
Small-scale	SNP	scf_000001_A_fumigatus_A1163	3804663	3804664	T->C	Y	AFUB_013460	3802346	3804863	NA	Putative major facilitator superfamily (MFS) transporter
Small-scale	SNP	scf_000001_A_fumigatus_A1163	3809935	3809936	C->T	Y	AFUB_013480	3809851	3811554	NA	protein of unknown function
Small-scale	SNP	scf_000001_A_fumigatus_A1163	3811975	3811976	G->A	Y	AFUB_013490	3811894	3813699	NA	Ortholog of Aspergillus fumigatus A1163 : AFUB_013490
Small-scale	SNP	scf_000001_A_fumigatus_A1163	3818352	3818353	G->A	Y	AFUB_013520	3817877	3819640	NA	Ortholog(s) have transcription cofactor activity
Small-scale	SNP	scf_000001_A_fumigatus_A1163	3820073	3820074	A->G	Y	AFUB_013530	3820018	3820781	NA	Has domain(s) with predicted FMN binding, oxidoreductase activity, pyridoxamine-phosphate oxidase activity and role in oxidation-reduction process
Small-scale	SNP	scf_000001_A_fumigatus_A1163	3844731	3844732	T->C	Y	AFUB_013670	3844605	3845684	NA	Has domain(s) with predicted hydrolase activity
Small-scale	SNP	scf_000001_A_fumigatus_A1163	3846691	3846692	C->A	Y	AFUB_013680	3846077	3847082	NA	Has domain(s) with predicted dolichyl-phosphate-mannose-glycolipid alpha-mannosyltransferase activity and role in GPI anchor biosynthetic process
Small-scale	SNP	scf_000001_A_fumigatus_A1163	3850387	3850388	T->C	Y	AFUB_013700	3850194	3851009	NA	Ortholog of Aspergillus fumigatus A1163 : AFUB_013700
Small-scale	SNP	scf_000001_A_fumigatus_A1163	3853874	3853875	A->G	Y	AFUB_013710	3851407	3855807	NA	Ortholog(s) have beta-galactosidase activity and role in carbohydrate metabolic process
Small-scale	SNP	scf_000001_A_fumigatus_A1163	3855400	3855401	G->A	Y	AFUB_013710	3851407	3855807	NA	Ortholog(s) have beta-galactosidase activity and role in carbohydrate metabolic process
Small-scale	SNP	scf_000001_A_fumigatus_A1163	3855670	3855671	C->T	Y	AFUB_013710	3851407	3855807	NA	Ortholog(s) have beta-galactosidase activity and role in carbohydrate metabolic process
Small-scale	SNP	scf_000001_A_fumigatus_A1163	3856469	3856470	C->T	Y	AFUB_013720	3855898	3859729	NA	Ortholog(s) have tRNA (cytosine-5-)-methyltransferase activity, tRNA binding activity, role in cellular response to hydrogen peroxide, wobble base cytosine methylation and nucleus localization
Small-scale	SNP	scf_000001_A_fumigatus_A1163	3868439	3868440	G->A	Y	AFUB_013770	3868160	3868981	NA	Ortholog of A. nidulans FGSC A4 : AN2423, AN0736, A. fumigatus Af293 : Afu2g13800, A. niger CBS 513.88 : An01g12240, An02g05360 and A. oryzae RIB40 : AO090026000195
Small-scale	SNP	scf_000001_A_fumigatus_A1163	3870587	3870588	T->A	Y	AFUB_013790	3870585	3873290	NA	Ortholog(s) have role in Golgi vesicle transport and Golgi membrane localization
Small-scale	SNP	scf_000001_A_fumigatus_A1163	3870884	3870885	G->A	Y	AFUB_013790	3870585	3873290	NA	Ortholog(s) have role in Golgi vesicle transport and Golgi membrane localization
Small-scale	SNP	scf_000001_A_fumigatus_A1163	3871415	3871416	G->A	Y	AFUB_013790	3870585	3873290	NA	Ortholog(s) have role in Golgi vesicle transport and Golgi membrane localization
Small-scale	SNP	scf_000001_A_fumigatus_A1163	3871761	3871762	C->T	Y	AFUB_013790	3870585	3873290	NA	Ortholog(s) have role in Golgi vesicle transport and Golgi membrane localization
Small-scale	SNP	scf_000001_A_fumigatus_A1163	3879348	3879349	C->A	Y	AFUB_013810	3878060	3881856	NA	Ortholog of A. nidulans FGSC A4 : AN0763/vps3, A. niger CBS 513.88 : An01g12300, Aspergillus wentii : Aspwe1_0132860, Aspergillus sydowii : Aspsy1_0144683 and Aspergillus terreus NIH2624 : ATET_00628
Small-scale	SNP	scf_000001_A_fumigatus_A1163	3880344	3880345	C->A	Y	AFUB_013810	3878060	3881856	NA	Ortholog of A. nidulans FGSC A4 : AN0763/vps3, A. niger CBS 513.88 : An01g12300, Aspergillus wentii : Aspwe1_0132860, Aspergillus sydowii : Aspsy1_0144683 and Aspergillus terreus NIH2624 : ATET_00628
Small-scale	SNP	scf_000001_A_fumigatus_A1163	3880901	3880902	C->T	Y	AFUB_013810	3878060	3881856	NA	Ortholog of A. nidulans FGSC A4 : AN0763/vps3, A. niger CBS 513.88 : An01g12300, Aspergillus wentii : Aspwe1_0132860, Aspergillus sydowii : Aspsy1_0144683 and Aspergillus terreus NIH2624 : ATET_00628
Small-scale	SNP	scf_000001_A_fumigatus_A1163	3881295	3881296	A->G	Y	AFUB_013810	3878060	3881856	NA	Ortholog of A. nidulans FGSC A4 : AN0763/vps3, A. niger CBS 513.88 : An01g12300, Aspergillus wentii : Aspwe1_0132860, Aspergillus sydowii : Aspsy1_0144683 and Aspergillus terreus NIH2624 : ATET_00628
Small-scale	SNP	scf_000001_A_fumigatus_A1163	3882079	3882080	T->C	Y	AFUB_013820	3882001	3883126	NA	Has domain(s) with predicted catalytic activity, catechol 1,2-dioxygenase activity, ferric iron binding, iron ion binding and oxidoreductase activity, more
Small-scale	SNP	scf_000001_A_fumigatus_A1163	3884268	3884269	G->A	Y	AFUB_013830	3883847	3887018	NA	Has domain(s) with predicted RNA polymerase II transcription factor activity, sequence-specific DNA binding, zinc ion binding activity, role in regulation of transcription, DNA-templated and nucleus localization
Small-scale	SNP	scf_000001_A_fumigatus_A1163	3891363	3891364	T->C	Y	AFUB_013850	3890472	3892026	NA	Putative fasciclin domain family protein with a predicted role in cell adhesion
Small-scale	SNP	scf_000001_A_fumigatus_A1163	3893614	3893615	A->C	Y	AFUB_013860	3892636	3894528	NA	Ortholog(s) have poly(A) RNA binding, poly(A)-specific ribonuclease activity, role in nuclear-transcribed mRNA poly(A) tail shortening, postreplication repair and PAN complex localization
Small-scale	SNP	scf_000001_A_fumigatus_A1163	3915293	3915294	A->G	Y	AFUB_013920	3914885	3915774	NA	Has domain(s) with predicted oxidoreductase activity and role in metabolic process
Small-scale	SNP	scf_000001_A_fumigatus_A1163	3933959	3933960	T->C	Y	AFUB_014000	3933661	3935901	NA	Has domain(s) with predicted DNA binding, zinc ion binding activity, role in transcription, DNA-templated and nucleus localization
Small-scale	SNP	scf_000001_A_fumigatus_A1163	3935735	3935736	G->A	Y	AFUB_014000	3933661	3935901	NA	Has domain(s) with predicted DNA binding, zinc ion binding activity, role in transcription, DNA-templated and nucleus localization
Small-scale	SNP	scf_000001_A_fumigatus_A1163	3936784	3936785	G->A	Y	AFUB_014010	3936622	3937630	NA	Ortholog of Aspergillus fumigatus A1163 : AFUB_014010
Small-scale	SNP	scf_000001_A_fumigatus_A1163	3961469	3961470	A->C	Y	AFUB_014100	3961468	3964324	NA	Putative phosphoribosyl-AMP cyclohydrolase
Small-scale	SNP	scf_000001_A_fumigatus_A1163	3963072	3963073	G->A	Y	AFUB_014100	3961468	3964324	NA	Putative phosphoribosyl-AMP cyclohydrolase
Small-scale	SNP	scf_000001_A_fumigatus_A1163	3966339	3966340	G->A	Y	AFUB_014120	3965929	3966441	NA	Ortholog of A. nidulans FGSC A4 : AN0795, A. niger CBS 513.88 : An01g12590, Neosartorya fischeri NRRL 181 : NFIA_010830, Aspergillus wentii : Aspwe1_0027661 and Aspergillus versicolor : Aspve1_0121944
Small-scale	SNP	scf_000001_A_fumigatus_A1163	3976285	3976286	T->G	Y	AFUB_014160	3975478	3976955	NA	Ortholog(s) have tRNA guanylyltransferase activity, role in tRNA modification and cytosol, nucleus localization
Small-scale	SNP	scf_000001_A_fumigatus_A1163	3991252	3991253	A->G	Y	AFUB_014210	3989493	3991315	NA	Ortholog(s) have role in G2/M transition of mitotic cell cycle, histone H3-K4 methylation, positive regulation of mitotic nuclear division and Set1C/COMPASS complex, cytosol localization
Small-scale	SNP	scf_000001_A_fumigatus_A1163	3992019	3992020	A->C	Y	AFUB_014220	3991582	3997927	NA	Ortholog(s) have DNA binding activity and cytosol, nucleus localization
Small-scale	SNP	scf_000001_A_fumigatus_A1163	3998090	3998091	C->T	Y	AFUB_014230	3998070	4001045	NA	Ortholog(s) have role in cellular protein catabolic process
Small-scale	SNP	scf_000001_A_fumigatus_A1163	3998170	3998171	G->T	Y	AFUB_014230	3998070	4001045	NA	Ortholog(s) have role in cellular protein catabolic process
Small-scale	SNP	scf_000001_A_fumigatus_A1163	3998393	3998394	A->T	Y	AFUB_014230	3998070	4001045	NA	Ortholog(s) have role in cellular protein catabolic process
Small-scale	SNP	scf_000001_A_fumigatus_A1163	3998607	3998608	C->T	Y	AFUB_014230	3998070	4001045	NA	Ortholog(s) have role in cellular protein catabolic process
Small-scale	SNP	scf_000001_A_fumigatus_A1163	3998782	3998783	T->C	Y	AFUB_014230	3998070	4001045	NA	Ortholog(s) have role in cellular protein catabolic process
Small-scale	SNP	scf_000001_A_fumigatus_A1163	4003085	4003086	C->G	Y	AFUB_014250	4002981	4004769	NA	Has domain(s) with predicted role in transmembrane transport and integral component of membrane localization
Small-scale	SNP	scf_000001_A_fumigatus_A1163	4014266	4014267	G->A	Y	AFUB_014290	4013363	4015114	NA	Ortholog(s) have RNA polymerase II transcription factor activity, TBP-class protein binding, involved in preinitiation complex assembly, TBP-class protein binding activity
Small-scale	SNP	scf_000001_A_fumigatus_A1163	4016330	4016331	T->A	Y	AFUB_014300	4015719	4018978	NA	Ortholog(s) have role in positive regulation of ribosomal protein gene transcription from RNA polymerase II promoter, regulation of cell size and cytoplasm, nucleus localization
Small-scale	SNP	scf_000001_A_fumigatus_A1163	4028265	4028266	G->C	Y	AFUB_014330	4026545	4030040	NA	Ortholog(s) have role in establishment or maintenance of cell polarity, mitochondrial outer membrane translocase complex assembly, mitochondrion inheritance, mitochondrion-ER tethering, phospholipid transport
Small-scale	SNP	scf_000001_A_fumigatus_A1163	4049906	4049907	G->A	Y	AFUB_014400	4049408	4050392	NA	Has domain(s) with predicted sequence-specific DNA binding, transcription factor activity, sequence-specific DNA binding activity and role in regulation of transcription, DNA-templated
Small-scale	SNP	scf_000001_A_fumigatus_A1163	4063129	4063130	A->T	Y	AFUB_014440	4062509	4063751	NA	NA
Small-scale	SNP	scf_000001_A_fumigatus_A1163	4063217	4063218	G->T	Y	AFUB_014440	4062509	4063751	NA	NA
Small-scale	SNP	scf_000001_A_fumigatus_A1163	4064317	4064318	T->G	Y	AFUB_014450	4064245	4066764	NA	Ortholog(s) have cytoplasm localization
Small-scale	SNP	scf_000001_A_fumigatus_A1163	4064651	4064652	G->A	Y	AFUB_014450	4064245	4066764	NA	Ortholog(s) have cytoplasm localization
Small-scale	SNP	scf_000001_A_fumigatus_A1163	4071327	4071328	G->A	Y	AFUB_014470	4069780	4071350	NA	Ortholog of A. nidulans FGSC A4 : AN0833, A. oryzae RIB40 : AO090005001239, Aspergillus wentii : Aspwe1_0171773, Aspergillus sydowii : Aspsy1_0139633 and Aspergillus terreus NIH2624 : ATET_00857
Small-scale	SNP	scf_000001_A_fumigatus_A1163	4075291	4075292	A->G	Y	AFUB_014490	4074998	4076202	NA	Has domain(s) with predicted RNA polymerase II transcription factor activity, sequence-specific DNA binding, zinc ion binding activity, role in regulation of transcription, DNA-templated and nucleus localization
Small-scale	SNP	scf_000001_A_fumigatus_A1163	4075986	4075987	G->C	Y	AFUB_014490	4074998	4076202	NA	Has domain(s) with predicted RNA polymerase II transcription factor activity, sequence-specific DNA binding, zinc ion binding activity, role in regulation of transcription, DNA-templated and nucleus localization
Small-scale	SNP	scf_000001_A_fumigatus_A1163	4078744	4078745	C->T	Y	AFUB_014500	4078512	4078868	NA	NA
Small-scale	SNP	scf_000001_A_fumigatus_A1163	4079614	4079615	C->T	Y	AFUB_014510	4079591	4081502	NA	Ortholog(s) have D-arabinono-1,4-lactone oxidase activity
Small-scale	SNP	scf_000001_A_fumigatus_A1163	4081106	4081107	C->T	Y	AFUB_014510	4079591	4081502	NA	Ortholog(s) have D-arabinono-1,4-lactone oxidase activity
Small-scale	SNP	scf_000001_A_fumigatus_A1163	4081181	4081182	T->C	Y	AFUB_014510	4079591	4081502	NA	Ortholog(s) have D-arabinono-1,4-lactone oxidase activity
Small-scale	SNP	scf_000001_A_fumigatus_A1163	4086437	4086438	C->T	Y	AFUB_014520	4081654	4087431	NA	Has domain(s) with predicted actin binding activity
Small-scale	SNP	scf_000001_A_fumigatus_A1163	4087249	4087250	C->T	Y	AFUB_014520	4081654	4087431	NA	Has domain(s) with predicted actin binding activity
Small-scale	SNP	scf_000001_A_fumigatus_A1163	4095144	4095145	C->T	Y	AFUB_014550	4093134	4095954	NA	Ortholog(s) have nucleolus localization
Small-scale	SNP	scf_000001_A_fumigatus_A1163	4113896	4113897	G->A	Y	AFUB_014610	4112356	4115885	lhs1	Hsp70 family chaperone
Small-scale	SNP	scf_000001_A_fumigatus_A1163	4115604	4115605	T->G	Y	AFUB_014610	4112356	4115885	lhs1	Hsp70 family chaperone
Small-scale	SNP	scf_000001_A_fumigatus_A1163	4116518	4116519	C->T	Y	AFUB_014620	4116022	4118142	NA	Ortholog(s) have role in mitochondrial genome maintenance, plasmid maintenance and cytosol, mitochondrion localization
Small-scale	SNP	scf_000001_A_fumigatus_A1163	4121567	4121568	A->G	Y	AFUB_014640	4120934	4123157	NA	Ortholog(s) have Golgi apparatus, endoplasmic reticulum, lipid particle localization
Small-scale	SNP	scf_000001_A_fumigatus_A1163	4121901	4121902	A->G	Y	AFUB_014640	4120934	4123157	NA	Ortholog(s) have Golgi apparatus, endoplasmic reticulum, lipid particle localization
Small-scale	SNP	scf_000001_A_fumigatus_A1163	4122589	4122590	A->T	Y	AFUB_014640	4120934	4123157	NA	Ortholog(s) have Golgi apparatus, endoplasmic reticulum, lipid particle localization
Small-scale	SNP	scf_000001_A_fumigatus_A1163	4132178	4132179	A->C	Y	AFUB_014670	4131144	4134107	NA	Ortholog(s) have DNA translocase activity, double-stranded DNA binding activity and role in DNA duplex unwinding, DNA repair, heteroduplex formation, meiotic sister chromatid segregation, reciprocal meiotic recombination
Small-scale	SNP	scf_000001_A_fumigatus_A1163	4143847	4143848	A->G	Y	AFUB_014700	4143419	4145852	NA	Ortholog(s) have hydrolase activity, hydrolyzing O-glycosyl compounds activity and role in carbohydrate metabolic process
Small-scale	SNP	scf_000001_A_fumigatus_A1163	4144151	4144152	A->G	Y	AFUB_014700	4143419	4145852	NA	Ortholog(s) have hydrolase activity, hydrolyzing O-glycosyl compounds activity and role in carbohydrate metabolic process
Small-scale	SNP	scf_000001_A_fumigatus_A1163	4178860	4178861	T->G	Y	AFUB_014820	4178219	4181212	NA	Ortholog(s) have ATPase activity, misfolded protein binding activity, role in cellular response to misfolded protein, protein refolding, protein unfolding and cytosol, nuclear envelope localization
Small-scale	SNP	scf_000001_A_fumigatus_A1163	4198330	4198331	G->A	Y	AFUB_014860	4197137	4200584	NA	Ortholog(s) have chromatin binding activity, role in mitotic DNA replication preinitiation complex assembly and cytosol, nuclear chromatin localization
Small-scale	SNP	scf_000001_A_fumigatus_A1163	4208726	4208727	C->A	Y	AFUB_014900	4207790	4209205	NA	Has domain(s) with predicted FMN binding, oxidoreductase activity, riboflavin reductase (NADPH) activity and role in oxidation-reduction process
Small-scale	SNP	scf_000001_A_fumigatus_A1163	4213592	4213593	T->C	Y	AFUB_014910	4209825	4214180	NA	Has domain(s) with predicted DNA binding, RNA polymerase II transcription factor activity, sequence-specific DNA binding, zinc ion binding activity and role in regulation of transcription, DNA-templated, transcription, DNA-templated
Small-scale	SNP	scf_000001_A_fumigatus_A1163	4214863	4214864	G->A	Y	AFUB_014920	4214684	4217320	NA	Ortholog of A. nidulans FGSC A4 : AN10133, A. niger CBS 513.88 : An01g13650, Aspergillus wentii : Aspwe1_0482639 and Aspergillus sydowii : Aspsy1_0191721
Small-scale	SNP	scf_000001_A_fumigatus_A1163	4216436	4216437	T->C	Y	AFUB_014920	4214684	4217320	NA	Ortholog of A. nidulans FGSC A4 : AN10133, A. niger CBS 513.88 : An01g13650, Aspergillus wentii : Aspwe1_0482639 and Aspergillus sydowii : Aspsy1_0191721
Small-scale	SNP	scf_000001_A_fumigatus_A1163	4224123	4224124	C->T	Y	AFUB_014950	4222882	4224363	NA	Has domain(s) with predicted zinc ion binding activity
Small-scale	SNP	scf_000001_A_fumigatus_A1163	4231977	4231978	G->A	Y	AFUB_014990	4231657	4239048	ags3	Putative alpha(1-3) glucan synthase
Small-scale	SNP	scf_000001_A_fumigatus_A1163	4234133	4234134	G->A	Y	AFUB_014990	4231657	4239048	ags3	Putative alpha(1-3) glucan synthase
Small-scale	SNP	scf_000001_A_fumigatus_A1163	4235795	4235796	C->T	Y	AFUB_014990	4231657	4239048	ags3	Putative alpha(1-3) glucan synthase
Small-scale	SNP	scf_000001_A_fumigatus_A1163	4250442	4250443	C->G	Y	AFUB_015020	4246643	4250774	NA	Ortholog(s) have RNA polymerase II transcription factor activity, sequence-specific DNA binding, sequence-specific DNA binding, zinc ion binding activity
Small-scale	SNP	scf_000001_A_fumigatus_A1163	4251456	4251457	A->G	Y	AFUB_015030	4251388	4254604	mfsB	Putative major facilitator superfamily (MFS) transporter
Small-scale	SNP	scf_000001_A_fumigatus_A1163	4254369	4254370	A->C	Y	AFUB_015030	4251388	4254604	mfsB	Putative major facilitator superfamily (MFS) transporter
Small-scale	SNP	scf_000001_A_fumigatus_A1163	4265091	4265092	T->C	Y	AFUB_015040	4263785	4265769	NA	Ortholog(s) have ribosome binding activity, role in cytoplasmic translation and extrinsic component of membrane, mitochondrial inner membrane localization
Small-scale	SNP	scf_000001_A_fumigatus_A1163	4269454	4269455	T->G	Y	AFUB_015060	4268123	4272111	NA	Ortholog(s) have allophanate hydrolase activity, urea carboxylase activity, role in cellular response to alkaline pH, nitrogen utilization, pathogenesis, urea catabolic process and cytoplasm localization
Small-scale	SNP	scf_000001_A_fumigatus_A1163	4288421	4288422	G->A	Y	AFUB_015150	4288417	4290571	helA	Putative DEAD box RNA helicase
Small-scale	SNP	scf_000001_A_fumigatus_A1163	4302595	4302596	C->T	Y	AFUB_015200	4301239	4303393	NA	Putative laccase
Small-scale	SNP	scf_000001_A_fumigatus_A1163	4318994	4318995	C->T	Y	AFUB_015250	4318849	4323328	NA	Ortholog(s) have cytoplasm, nuclear envelope, nuclear periphery localization
Small-scale	SNP	scf_000001_A_fumigatus_A1163	4324201	4324202	T->G	Y	AFUB_015260	4323946	4324620	NA	40S ribosomal protein S22
Small-scale	SNP	scf_000001_A_fumigatus_A1163	4328630	4328631	C->T	Y	AFUB_015280	4326525	4328927	NA	Ortholog(s) have role in cellular protein catabolic process
Small-scale	SNP	scf_000001_A_fumigatus_A1163	4329835	4329836	T->C	Y	AFUB_015290	4329025	4331028	NA	Ortholog(s) have phosphatidylserine decarboxylase activity
Small-scale	SNP	scf_000001_A_fumigatus_A1163	4334452	4334453	A->T	Y	AFUB_015310	4332992	4334505	leu2A	3-isopropylmalate dehydrogenase with a predicted role in leucine biosynthesis
Small-scale	SNP	scf_000001_A_fumigatus_A1163	4334663	4334664	C->T	Y	AFUB_015320	4334654	4336791	NA	Ortholog(s) have CDP-diacylglycerol-inositol 3-phosphatidyltransferase activity, role in phosphatidylinositol biosynthetic process and Golgi apparatus, integral component of membrane, mitochondrial outer membrane localization
Small-scale	SNP	scf_000001_A_fumigatus_A1163	4339370	4339371	G->A	Y	AFUB_015330	4337296	4340970	ptcA	Ortholog(s) have protein serine/threonine phosphatase activity, role in protein dephosphorylation and mitochondrion localization
Small-scale	SNP	scf_000001_A_fumigatus_A1163	4349606	4349607	C->T	Y	AFUB_015360	4348475	4350580	NA	Has domain(s) with predicted catalytic activity, orotidine-5'-phosphate decarboxylase activity and role in 'de novo' pyrimidine nucleobase biosynthetic process
Small-scale	SNP	scf_000001_A_fumigatus_A1163	4352517	4352518	G->A	Y	AFUB_015370	4350586	4352881	NA	Ortholog of A. nidulans FGSC A4 : AN0920, A. niger CBS 513.88 : An01g14230, A. oryzae RIB40 : AO090005001115, Aspergillus wentii : Aspwe1_0039943 and Aspergillus sydowii : Aspsy1_0038467
Small-scale	SNP	scf_000001_A_fumigatus_A1163	4352592	4352593	A->T	Y	AFUB_015370	4350586	4352881	NA	Ortholog of A. nidulans FGSC A4 : AN0920, A. niger CBS 513.88 : An01g14230, A. oryzae RIB40 : AO090005001115, Aspergillus wentii : Aspwe1_0039943 and Aspergillus sydowii : Aspsy1_0038467
Small-scale	SNP	scf_000001_A_fumigatus_A1163	4357811	4357812	G->T	Y	AFUB_015390	4357750	4359907	NA	Has domain(s) with predicted role in intracellular protein transport, vesicle-mediated transport and clathrin adaptor complex localization
Small-scale	SNP	scf_000001_A_fumigatus_A1163	4362146	4362147	T->C	Y	AFUB_015400	4360136	4363459	NA	Ortholog of A. nidulans FGSC A4 : AN0923, A. niger CBS 513.88 : An01g14280, A. oryzae RIB40 : AO090005001113, Aspergillus sydowii : Aspsy1_0053441 and Aspergillus glaucus : Aspgl1_0063899
Small-scale	SNP	scf_000001_A_fumigatus_A1163	4362197	4362198	A->G	Y	AFUB_015400	4360136	4363459	NA	Ortholog of A. nidulans FGSC A4 : AN0923, A. niger CBS 513.88 : An01g14280, A. oryzae RIB40 : AO090005001113, Aspergillus sydowii : Aspsy1_0053441 and Aspergillus glaucus : Aspgl1_0063899
Small-scale	SNP	scf_000001_A_fumigatus_A1163	4362418	4362419	A->C	Y	AFUB_015400	4360136	4363459	NA	Ortholog of A. nidulans FGSC A4 : AN0923, A. niger CBS 513.88 : An01g14280, A. oryzae RIB40 : AO090005001113, Aspergillus sydowii : Aspsy1_0053441 and Aspergillus glaucus : Aspgl1_0063899
Small-scale	SNP	scf_000001_A_fumigatus_A1163	4366166	4366167	A->G	Y	AFUB_015410	4364698	4367101	NA	Has domain(s) with predicted magnesium ion transmembrane transporter activity, role in magnesium ion transport and integral component of membrane localization
Small-scale	SNP	scf_000001_A_fumigatus_A1163	4366171	4366172	A->G	Y	AFUB_015410	4364698	4367101	NA	Has domain(s) with predicted magnesium ion transmembrane transporter activity, role in magnesium ion transport and integral component of membrane localization
Small-scale	SNP	scf_000001_A_fumigatus_A1163	4366273	4366274	T->C	Y	AFUB_015410	4364698	4367101	NA	Has domain(s) with predicted magnesium ion transmembrane transporter activity, role in magnesium ion transport and integral component of membrane localization
Small-scale	SNP	scf_000001_A_fumigatus_A1163	4366288	4366289	G->A	Y	AFUB_015410	4364698	4367101	NA	Has domain(s) with predicted magnesium ion transmembrane transporter activity, role in magnesium ion transport and integral component of membrane localization
Small-scale	SNP	scf_000001_A_fumigatus_A1163	4367366	4367367	C->G	Y	AFUB_015420	4367132	4370669	NA	Has domain(s) with predicted phosphoric ester hydrolase activity
Small-scale	SNP	scf_000001_A_fumigatus_A1163	4371114	4371115	A->T	Y	AFUB_015430	4371064	4375391	NA	Ortholog(s) have cytosol, nuclear envelope, nuclear periphery localization
Small-scale	SNP	scf_000001_A_fumigatus_A1163	4372107	4372108	A->C	Y	AFUB_015430	4371064	4375391	NA	Ortholog(s) have cytosol, nuclear envelope, nuclear periphery localization
Small-scale	SNP	scf_000001_A_fumigatus_A1163	4374662	4374663	A->G	Y	AFUB_015430	4371064	4375391	NA	Ortholog(s) have cytosol, nuclear envelope, nuclear periphery localization
Small-scale	SNP	scf_000001_A_fumigatus_A1163	4375246	4375247	A->C	Y	AFUB_015430	4371064	4375391	NA	Ortholog(s) have cytosol, nuclear envelope, nuclear periphery localization
Small-scale	SNP	scf_000001_A_fumigatus_A1163	4383429	4383430	C->A	Y	AFUB_015440	4382353	4384235	NA	Ortholog(s) have role in conidiophore development
Small-scale	SNP	scf_000001_A_fumigatus_A1163	4386189	4386190	G->A	Y	AFUB_015450	4386117	4387183	NA	Ortholog(s) have ubiquitin-specific protease activity, role in cellular response to drug, protein deubiquitination and nuclear periphery localization
Small-scale	SNP	scf_000001_A_fumigatus_A1163	4387699	4387700	G->T	Y	AFUB_015460	4387408	4389822	NA	Ortholog(s) have choline kinase activity, ethanolamine kinase activity, role in phosphatidylcholine biosynthetic process, phosphatidylethanolamine biosynthetic process and cytosol, nucleus localization
Small-scale	SNP	scf_000001_A_fumigatus_A1163	4394144	4394145	C->A	Y	AFUB_015470	4392926	4395619	NA	Ortholog(s) have endoplasmic reticulum localization
Small-scale	SNP	scf_000001_A_fumigatus_A1163	4395298	4395299	T->A	Y	AFUB_015470	4392926	4395619	NA	Ortholog(s) have endoplasmic reticulum localization
Small-scale	SNP	scf_000001_A_fumigatus_A1163	4409676	4409677	T->C	Y	AFUB_015520	4409653	4410408	NA	Ortholog of Aspergillus glaucus : Aspgl1_0125948, Neosartorya fischeri NRRL 181 : NFIA_009270, Aspergillus wentii : Aspwe1_0024586, Aspwe1_0174794 and Aspergillus versicolor : Aspve1_0041975
Small-scale	SNP	scf_000001_A_fumigatus_A1163	4416801	4416802	C->A	Y	AFUB_015530	4416308	4418112	aspf9	Cell wall glucanase
Small-scale	SNP	scf_000001_A_fumigatus_A1163	4433314	4433315	A->C	Y	AFUB_015590	4430570	4434447	NA	Putative alpha-glucosidase B
Small-scale	SNP	scf_000001_A_fumigatus_A1163	4434288	4434289	T->C	Y	AFUB_015590	4430570	4434447	NA	Putative alpha-glucosidase B
Small-scale	SNP	scf_000001_A_fumigatus_A1163	4442160	4442161	A->G	Y	AFUB_015630	4441416	4443635	NA	Ortholog(s) have cytosol localization
Small-scale	SNP	scf_000001_A_fumigatus_A1163	4456758	4456759	G->A	Y	AFUB_015715	4455716	4458217	NA	Ortholog(s) have nitrate reductase (NADPH) activity and role in molybdopterin cofactor biosynthetic process
Small-scale	SNP	scf_000001_A_fumigatus_A1163	4464107	4464108	C->G	Y	AFUB_015750	4462214	4464109	NA	Has domain(s) with predicted DNA binding, RNA polymerase II transcription factor activity, sequence-specific DNA binding, zinc ion binding activity and role in regulation of transcription, DNA-templated, transcription, DNA-templated
Small-scale	SNP	scf_000001_A_fumigatus_A1163	4467385	4467386	C->T	Y	AFUB_015770	4467156	4469743	NA	Ortholog(s) have extracellular region localization
Small-scale	SNP	scf_000001_A_fumigatus_A1163	4469412	4469413	A->G	Y	AFUB_015770	4467156	4469743	NA	Ortholog(s) have extracellular region localization
Small-scale	SNP	scf_000001_A_fumigatus_A1163	4469646	4469647	A->G	Y	AFUB_015770	4467156	4469743	NA	Ortholog(s) have extracellular region localization
Small-scale	SNP	scf_000001_A_fumigatus_A1163	4470787	4470788	T->C	Y	AFUB_015780	4470063	4472619	NA	Has domain(s) with predicted ATP binding, ATPase activity, nucleoside-triphosphatase activity, nucleotide binding activity
Small-scale	SNP	scf_000001_A_fumigatus_A1163	4474474	4474475	A->G	Y	AFUB_015790	4473472	4474735	NA	Ortholog of Aspergillus fumigatus A1163 : AFUB_015790
Small-scale	SNP	scf_000001_A_fumigatus_A1163	4478482	4478483	T->A	Y	AFUB_015800	4476712	4479479	ADS-4	Ortholog(s) have role in asexual sporulation, sexual sporulation resulting in formation of a cellular spore
Small-scale	SNP	scf_000001_A_fumigatus_A1163	4481126	4481127	A->G	Y	AFUB_015810	4480119	4483364	NA	Ortholog(s) have 3'-tRNA processing endoribonuclease activity, role in mitochondrial tRNA 3'-end processing, nuclear tRNA 3'-trailer cleavage, endonucleolytic and mitochondrion, nucleus localization
Small-scale	SNP	scf_000001_A_fumigatus_A1163	4482150	4482151	C->A	Y	AFUB_015810	4480119	4483364	NA	Ortholog(s) have 3'-tRNA processing endoribonuclease activity, role in mitochondrial tRNA 3'-end processing, nuclear tRNA 3'-trailer cleavage, endonucleolytic and mitochondrion, nucleus localization
Small-scale	SNP	scf_000001_A_fumigatus_A1163	4489379	4489380	G->T	Y	AFUB_015840	4487405	4489451	NA	Ortholog(s) have cytosol, nucleus localization
Small-scale	SNP	scf_000001_A_fumigatus_A1163	4495807	4495808	A->C	Y	AFUB_015880	4494777	4496427	NA	Dihydrouridine synthase family protein
Small-scale	SNP	scf_000001_A_fumigatus_A1163	4500362	4500363	G->A	Y	AFUB_015910	4499095	4500430	NA	Ortholog of Neosartorya fischeri NRRL 181 : NFIA_008870, Aspergillus wentii : Aspwe1_0477100, Aspergillus versicolor : Aspve1_0049218 and Aspergillus clavatus NRRL 1 : ACLA_019020
Small-scale	SNP	scf_000001_A_fumigatus_A1163	4526637	4526638	C->T	Y	AFUB_015970	4525818	4526760	NA	Has domain(s) with predicted RNA binding, ribonuclease T2 activity
Small-scale	SNP	scf_000001_A_fumigatus_A1163	4530021	4530022	C->G	Y	AFUB_015990	4528730	4531511	NA	Has domain(s) with predicted DNA binding, zinc ion binding activity, role in transcription, DNA-templated and nucleus localization
Small-scale	SNP	scf_000001_A_fumigatus_A1163	4540266	4540267	G->A	Y	AFUB_016050	4540168	4541193	NA	Ortholog of Neosartorya fischeri NRRL 181 : NFIA_008720 and Aspergillus fumigatus A1163 : AFUB_016050
Small-scale	SNP	scf_000001_A_fumigatus_A1163	4540477	4540478	T->G	Y	AFUB_016050	4540168	4541193	NA	Ortholog of Neosartorya fischeri NRRL 181 : NFIA_008720 and Aspergillus fumigatus A1163 : AFUB_016050
Small-scale	SNP	scf_000001_A_fumigatus_A1163	4562300	4562301	A->T	Y	AFUB_016090	4561769	4564331	NA	Has domain(s) with predicted integral component of membrane localization
Small-scale	SNP	scf_000001_A_fumigatus_A1163	4569476	4569477	G->A	Y	AFUB_016110	4567244	4571809	NA	Ortholog(s) have pseudouridine synthase activity, role in enzyme-directed rRNA pseudouridine synthesis, mRNA pseudouridine synthesis, snRNA pseudouridine synthesis, tRNA pseudouridine synthesis and cytoplasm, nucleus localization
Small-scale	SNP	scf_000001_A_fumigatus_A1163	4570738	4570739	C->T	Y	AFUB_016110	4567244	4571809	NA	Ortholog(s) have pseudouridine synthase activity, role in enzyme-directed rRNA pseudouridine synthesis, mRNA pseudouridine synthesis, snRNA pseudouridine synthesis, tRNA pseudouridine synthesis and cytoplasm, nucleus localization
Small-scale	SNP	scf_000001_A_fumigatus_A1163	4580020	4580021	C->T	Y	AFUB_016130	4578949	4582532	NA	Has domain(s) with predicted zinc ion binding activity
Small-scale	SNP	scf_000001_A_fumigatus_A1163	4581123	4581124	G->A	Y	AFUB_016130	4578949	4582532	NA	Has domain(s) with predicted zinc ion binding activity
Small-scale	SNP	scf_000001_A_fumigatus_A1163	4586454	4586455	G->A	Y	AFUB_016160	4585205	4587127	NA	Has domain(s) with predicted carbon-nitrogen ligase activity, with glutamine as amido-N-donor activity
Small-scale	SNP	scf_000001_A_fumigatus_A1163	4592127	4592128	T->C	Y	AFUB_016180	4592060	4594748	NA	Ortholog(s) have RNA polymerase II activating transcription factor binding, chromatin binding activity, role in transcription from RNA polymerase II promoter and transcription factor TFIID complex localization
Small-scale	SNP	scf_000001_A_fumigatus_A1163	4597897	4597898	C->T	Y	AFUB_016190	4594992	4598418	NA	Ortholog(s) have cytosol, mRNA cleavage and polyadenylation specificity factor complex localization
Small-scale	SNP	scf_000001_A_fumigatus_A1163	4609070	4609071	G->T	Y	AFUB_016240	4608840	4610665	sur2	Putative sphinganine hydroxylase with a predicted role in the hydroxylation of dihydrosphingosine (DHS) at position C-4
Small-scale	SNP	scf_000001_A_fumigatus_A1163	4618054	4618055	A->G	Y	AFUB_016270	4615263	4620448	NA	Ortholog(s) have glutathione S-conjugate-transporting ATPase activity and role in cellular response to cadmium ion, glutathione transmembrane import into vacuole, secondary metabolite biosynthetic process
Small-scale	SNP	scf_000001_A_fumigatus_A1163	4618150	4618151	C->T	Y	AFUB_016270	4615263	4620448	NA	Ortholog(s) have glutathione S-conjugate-transporting ATPase activity and role in cellular response to cadmium ion, glutathione transmembrane import into vacuole, secondary metabolite biosynthetic process
Small-scale	SNP	scf_000001_A_fumigatus_A1163	4618201	4618202	A->C	Y	AFUB_016270	4615263	4620448	NA	Ortholog(s) have glutathione S-conjugate-transporting ATPase activity and role in cellular response to cadmium ion, glutathione transmembrane import into vacuole, secondary metabolite biosynthetic process
Small-scale	SNP	scf_000001_A_fumigatus_A1163	4618266	4618267	G->A	Y	AFUB_016270	4615263	4620448	NA	Ortholog(s) have glutathione S-conjugate-transporting ATPase activity and role in cellular response to cadmium ion, glutathione transmembrane import into vacuole, secondary metabolite biosynthetic process
Small-scale	SNP	scf_000001_A_fumigatus_A1163	4619422	4619423	T->G	Y	AFUB_016270	4615263	4620448	NA	Ortholog(s) have glutathione S-conjugate-transporting ATPase activity and role in cellular response to cadmium ion, glutathione transmembrane import into vacuole, secondary metabolite biosynthetic process
Small-scale	SNP	scf_000001_A_fumigatus_A1163	4620412	4620413	C->G	Y	AFUB_016270	4615263	4620448	NA	Ortholog(s) have glutathione S-conjugate-transporting ATPase activity and role in cellular response to cadmium ion, glutathione transmembrane import into vacuole, secondary metabolite biosynthetic process
Small-scale	SNP	scf_000001_A_fumigatus_A1163	4621643	4621644	A->G	Y	AFUB_016280	4620799	4622094	NA	Ortholog(s) have intracellular localization
Small-scale	SNP	scf_000001_A_fumigatus_A1163	4631080	4631081	G->T	Y	AFUB_016300	4629820	4631642	NA	Has domain(s) with predicted role in transmembrane transport and integral component of membrane localization
Small-scale	SNP	scf_000001_A_fumigatus_A1163	4631211	4631212	G->A	Y	AFUB_016300	4629820	4631642	NA	Has domain(s) with predicted role in transmembrane transport and integral component of membrane localization
Small-scale	SNP	scf_000001_A_fumigatus_A1163	4631277	4631278	G->T	Y	AFUB_016300	4629820	4631642	NA	Has domain(s) with predicted role in transmembrane transport and integral component of membrane localization
Small-scale	SNP	scf_000001_A_fumigatus_A1163	4631603	4631604	A->G	Y	AFUB_016300	4629820	4631642	NA	Has domain(s) with predicted role in transmembrane transport and integral component of membrane localization
Small-scale	SNP	scf_000001_A_fumigatus_A1163	4632497	4632498	C->A	Y	AFUB_016310	4632488	4634866	NA	Beta-xylosidase
Small-scale	SNP	scf_000001_A_fumigatus_A1163	4632794	4632795	A->G	Y	AFUB_016310	4632488	4634866	NA	Beta-xylosidase
Small-scale	SNP	scf_000001_A_fumigatus_A1163	4633299	4633300	C->G	Y	AFUB_016310	4632488	4634866	NA	Beta-xylosidase
Small-scale	SNP	scf_000001_A_fumigatus_A1163	4633391	4633392	A->T	Y	AFUB_016310	4632488	4634866	NA	Beta-xylosidase
Small-scale	SNP	scf_000001_A_fumigatus_A1163	4633463	4633464	G->C	Y	AFUB_016310	4632488	4634866	NA	Beta-xylosidase
Small-scale	SNP	scf_000001_A_fumigatus_A1163	4639803	4639804	G->A	Y	AFUB_016320	4639200	4640347	NA	Has domain(s) with predicted phosphatidylserine decarboxylase activity and role in phospholipid biosynthetic process
Small-scale	SNP	scf_000001_A_fumigatus_A1163	4640316	4640317	A->C	Y	AFUB_016320	4639200	4640347	NA	Has domain(s) with predicted phosphatidylserine decarboxylase activity and role in phospholipid biosynthetic process
Small-scale	SNP	scf_000001_A_fumigatus_A1163	4641840	4641841	T->A	Y	AFUB_016330	4640585	4643270	NA	Ortholog(s) have role in maturation of 5.8S rRNA from tricistronic rRNA transcript (SSU-rRNA, 5.8S rRNA, LSU-rRNA), maturation of LSU-rRNA from tricistronic rRNA transcript (SSU-rRNA, 5.8S rRNA, LSU-rRNA)
Small-scale	SNP	scf_000001_A_fumigatus_A1163	4650116	4650117	G->A	Y	AFUB_016370	4648253	4650385	NA	Ortholog of A. nidulans FGSC A4 : AN0633, A. niger CBS 513.88 : An01g09880, A. oryzae RIB40 : AO090005000977, Aspergillus wentii : Aspwe1_0109484 and Aspergillus sydowii : Aspsy1_0055497
Small-scale	SNP	scf_000001_A_fumigatus_A1163	4650610	4650611	G->A	Y	AFUB_016380	4650607	4651795	NA	Ortholog(s) have nucleus localization
Small-scale	SNP	scf_000001_A_fumigatus_A1163	4650664	4650665	A->G	Y	AFUB_016380	4650607	4651795	NA	Ortholog(s) have nucleus localization
Small-scale	SNP	scf_000001_A_fumigatus_A1163	4650803	4650804	C->G	Y	AFUB_016380	4650607	4651795	NA	Ortholog(s) have nucleus localization
Small-scale	SNP	scf_000001_A_fumigatus_A1163	4651723	4651724	C->G	Y	AFUB_016380	4650607	4651795	NA	Ortholog(s) have nucleus localization
Small-scale	SNP	scf_000001_A_fumigatus_A1163	4656260	4656261	C->T	Y	AFUB_016410	4655584	4657617	ugd1	UDP-glucose dehydrogenase
Small-scale	SNP	scf_000001_A_fumigatus_A1163	4656367	4656368	A->G	Y	AFUB_016410	4655584	4657617	ugd1	UDP-glucose dehydrogenase
Small-scale	SNP	scf_000001_A_fumigatus_A1163	4658989	4658990	T->C	Y	AFUB_016420	4658238	4659671	NA	Putative glycosyl transferase, phoB-regulated
Small-scale	SNP	scf_000001_A_fumigatus_A1163	4674502	4674503	A->T	Y	AFUB_016460	4673115	4674690	NA	Ortholog(s) have fungal-type vacuole localization
Small-scale	SNP	scf_000001_A_fumigatus_A1163	4686690	4686691	T->C	Y	AFUB_016530	4685706	4686999	NA	Ortholog(s) have cytosol, nucleus localization
Small-scale	SNP	scf_000001_A_fumigatus_A1163	4689916	4689917	T->C	Y	AFUB_016540	4688203	4690250	NA	Ortholog(s) have role in maltose catabolic process, positive regulation of cell adhesion involved in single-species biofilm formation and regulation of transcription from RNA polymerase II promoter, more
Small-scale	SNP	scf_000001_A_fumigatus_A1163	4690033	4690034	A->G	Y	AFUB_016540	4688203	4690250	NA	Ortholog(s) have role in maltose catabolic process, positive regulation of cell adhesion involved in single-species biofilm formation and regulation of transcription from RNA polymerase II promoter, more
Small-scale	SNP	scf_000001_A_fumigatus_A1163	4690078	4690079	A->G	Y	AFUB_016540	4688203	4690250	NA	Ortholog(s) have role in maltose catabolic process, positive regulation of cell adhesion involved in single-species biofilm formation and regulation of transcription from RNA polymerase II promoter, more
Small-scale	SNP	scf_000001_A_fumigatus_A1163	4695856	4695857	T->G	Y	AFUB_016570	4694499	4696152	NA	Putative pyridine nucleotide-disulphide oxidoreductase
Small-scale	SNP	scf_000001_A_fumigatus_A1163	4696033	4696034	G->A	Y	AFUB_016570	4694499	4696152	NA	Putative pyridine nucleotide-disulphide oxidoreductase
Small-scale	SNP	scf_000001_A_fumigatus_A1163	4701815	4701816	C->G	Y	AFUB_016590	4700803	4715598	sidC	Putative non-ribosomal peptide synthetase (NRPS) involved in ferricrocin siderophore biosynthesis
Small-scale	SNP	scf_000001_A_fumigatus_A1163	4711040	4711041	G->A	Y	AFUB_016590	4700803	4715598	sidC	Putative non-ribosomal peptide synthetase (NRPS) involved in ferricrocin siderophore biosynthesis
Small-scale	SNP	scf_000001_A_fumigatus_A1163	4714083	4714084	A->T	Y	AFUB_016590	4700803	4715598	sidC	Putative non-ribosomal peptide synthetase (NRPS) involved in ferricrocin siderophore biosynthesis
Small-scale	SNP	scf_000001_A_fumigatus_A1163	4719628	4719629	G->A	Y	AFUB_016610	4718492	4719807	NA	Putative secreted polygalacturonase GH-28
Small-scale	SNP	scf_000001_A_fumigatus_A1163	4724612	4724613	A->G	Y	AFUB_016630	4723716	4725685	NA	Has domain(s) with predicted DNA binding, zinc ion binding activity, role in transcription, DNA-templated and nucleus localization
Small-scale	SNP	scf_000001_A_fumigatus_A1163	4725300	4725301	T->C	Y	AFUB_016630	4723716	4725685	NA	Has domain(s) with predicted DNA binding, zinc ion binding activity, role in transcription, DNA-templated and nucleus localization
Small-scale	SNP	scf_000001_A_fumigatus_A1163	4730573	4730574	T->C	Y	AFUB_016650	4730025	4731265	NA	Ortholog of A. nidulans FGSC A4 : AN3529, AN4144, AN8311, AN9211, AN4846 and A. fumigatus Af293 : Afu4g07950, Afu4g09380, Afu6g00560, Afu6g12140, Afu8g01900
Small-scale	SNP	scf_000001_A_fumigatus_A1163	4743660	4743661	T->G	Y	AFUB_016690	4742989	4745491	NA	Ortholog(s) have role in cellobiose transport, ethanol biosynthetic process
Small-scale	SNP	scf_000001_A_fumigatus_A1163	4749952	4749953	G->T	Y	AFUB_016700	4749425	4750513	NA	Has domain(s) with predicted hydrolase activity, hydrolyzing O-glycosyl compounds activity and role in carbohydrate metabolic process
Small-scale	SNP	scf_000001_A_fumigatus_A1163	4753155	4753156	T->C	Y	AFUB_016710	4751866	4753372	NA	Ortholog of Aspergillus fumigatus A1163 : AFUB_016710
Small-scale	SNP	scf_000001_A_fumigatus_A1163	4758014	4758015	A->G	Y	AFUB_016720	4755752	4759132	NA	Ortholog of A. oryzae RIB40 : AO090020000692, Neosartorya fischeri NRRL 181 : NFIA_008000, Aspergillus fumigatus A1163 : AFUB_016720 and Aspergillus clavatus NRRL 1 : ACLA_018150
Small-scale	SNP	scf_000001_A_fumigatus_A1163	4758051	4758052	G->C	Y	AFUB_016720	4755752	4759132	NA	Ortholog of A. oryzae RIB40 : AO090020000692, Neosartorya fischeri NRRL 181 : NFIA_008000, Aspergillus fumigatus A1163 : AFUB_016720 and Aspergillus clavatus NRRL 1 : ACLA_018150
Small-scale	SNP	scf_000001_A_fumigatus_A1163	4761661	4761662	C->T	Y	AFUB_016730	4761197	4763791	atfC	Putative bZip-type transcription factor with similarity to atfA
Small-scale	SNP	scf_000001_A_fumigatus_A1163	4764350	4764351	T->G	Y	AFUB_016740	4764350	4764895	scf1	Putative heat shock protein
Small-scale	SNP	scf_000001_A_fumigatus_A1163	4777635	4777636	T->C	Y	AFUB_016790	4776490	4778100	NA	Ortholog of Aspergillus fumigatus A1163 : AFUB_016790
Small-scale	SNP	scf_000001_A_fumigatus_A1163	4779935	4779936	C->G	Y	AFUB_016800	4779842	4782149	NA	Ortholog(s) have monophenol monooxygenase activity
Small-scale	SNP	scf_000001_A_fumigatus_A1163	4780918	4780919	C->T	Y	AFUB_016800	4779842	4782149	NA	Ortholog(s) have monophenol monooxygenase activity
Small-scale	SNP	scf_000001_A_fumigatus_A1163	4781082	4781083	T->G	Y	AFUB_016800	4779842	4782149	NA	Ortholog(s) have monophenol monooxygenase activity
Small-scale	SNP	scf_000001_A_fumigatus_A1163	4787435	4787436	G->C	Y	AFUB_016810	4783364	4787931	abcA	ABC drug exporter
Small-scale	SNP	scf_000001_A_fumigatus_A1163	4791434	4791435	A->G	Y	AFUB_016820	4791215	4793267	NA	Putative C6 transcription factor
Small-scale	SNP	scf_000001_A_fumigatus_A1163	4792208	4792209	C->G	Y	AFUB_016820	4791215	4793267	NA	Putative C6 transcription factor
Small-scale	SNP	scf_000001_A_fumigatus_A1163	4794338	4794339	C->T	Y	AFUB_016830	4794311	4796195	nrtB	Putative high-affinity nitrate transporter
Small-scale	SNP	scf_000001_A_fumigatus_A1163	4795298	4795299	C->T	Y	AFUB_016830	4794311	4796195	nrtB	Putative high-affinity nitrate transporter
Small-scale	SNP	scf_000001_A_fumigatus_A1163	4795514	4795515	A->C	Y	AFUB_016830	4794311	4796195	nrtB	Putative high-affinity nitrate transporter
Small-scale	SNP	scf_000001_A_fumigatus_A1163	4795585	4795586	G->A	Y	AFUB_016830	4794311	4796195	nrtB	Putative high-affinity nitrate transporter
Small-scale	SNP	scf_000001_A_fumigatus_A1163	4798624	4798625	C->T	Y	AFUB_016850	4798165	4800587	NA	Has domain(s) with predicted carbohydrate binding, carbon-oxygen lyase activity and role in amino sugar catabolic process, carbohydrate metabolic process
Small-scale	SNP	scf_000001_A_fumigatus_A1163	4798628	4798629	G->C	Y	AFUB_016850	4798165	4800587	NA	Has domain(s) with predicted carbohydrate binding, carbon-oxygen lyase activity and role in amino sugar catabolic process, carbohydrate metabolic process
Small-scale	SNP	scf_000001_A_fumigatus_A1163	4800943	4800944	C->T	Y	AFUB_016860	4800598	4802049	NA	NA
Small-scale	SNP	scf_000001_A_fumigatus_A1163	4801627	4801628	A->G	Y	AFUB_016860	4800598	4802049	NA	NA
Small-scale	SNP	scf_000001_A_fumigatus_A1163	4801752	4801753	T->C	Y	AFUB_016860	4800598	4802049	NA	NA
Small-scale	SNP	scf_000001_A_fumigatus_A1163	4801784	4801785	A->T	Y	AFUB_016860	4800598	4802049	NA	NA
Small-scale	SNP	scf_000001_A_fumigatus_A1163	4801805	4801806	G->A	Y	AFUB_016860	4800598	4802049	NA	NA
Small-scale	SNP	scf_000001_A_fumigatus_A1163	4801916	4801917	T->A	Y	AFUB_016860	4800598	4802049	NA	NA
Small-scale	SNP	scf_000001_A_fumigatus_A1163	4802918	4802919	A->G	Y	AFUB_016870	4802885	4805111	NA	Has domain(s) with predicted UDP-N-acetylmuramate dehydrogenase activity, catalytic activity, flavin adenine dinucleotide binding activity and role in oxidation-reduction process
Small-scale	SNP	scf_000001_A_fumigatus_A1163	4802983	4802984	C->T	Y	AFUB_016870	4802885	4805111	NA	Has domain(s) with predicted UDP-N-acetylmuramate dehydrogenase activity, catalytic activity, flavin adenine dinucleotide binding activity and role in oxidation-reduction process
Small-scale	SNP	scf_000001_A_fumigatus_A1163	4804080	4804081	A->G	Y	AFUB_016870	4802885	4805111	NA	Has domain(s) with predicted UDP-N-acetylmuramate dehydrogenase activity, catalytic activity, flavin adenine dinucleotide binding activity and role in oxidation-reduction process
Small-scale	SNP	scf_000001_A_fumigatus_A1163	4804168	4804169	T->C	Y	AFUB_016870	4802885	4805111	NA	Has domain(s) with predicted UDP-N-acetylmuramate dehydrogenase activity, catalytic activity, flavin adenine dinucleotide binding activity and role in oxidation-reduction process
Small-scale	SNP	scf_000001_A_fumigatus_A1163	4804491	4804492	T->G	Y	AFUB_016870	4802885	4805111	NA	Has domain(s) with predicted UDP-N-acetylmuramate dehydrogenase activity, catalytic activity, flavin adenine dinucleotide binding activity and role in oxidation-reduction process
Small-scale	SNP	scf_000001_A_fumigatus_A1163	4804510	4804511	C->G	Y	AFUB_016870	4802885	4805111	NA	Has domain(s) with predicted UDP-N-acetylmuramate dehydrogenase activity, catalytic activity, flavin adenine dinucleotide binding activity and role in oxidation-reduction process
Small-scale	SNP	scf_000001_A_fumigatus_A1163	4806054	4806055	C->T	Y	AFUB_016880	4805466	4807318	NA	Has domain(s) with predicted role in transmembrane transport and integral component of membrane localization
Small-scale	SNP	scf_000001_A_fumigatus_A1163	4806108	4806109	G->A	Y	AFUB_016880	4805466	4807318	NA	Has domain(s) with predicted role in transmembrane transport and integral component of membrane localization
Small-scale	SNP	scf_000001_A_fumigatus_A1163	4806606	4806607	T->G	Y	AFUB_016880	4805466	4807318	NA	Has domain(s) with predicted role in transmembrane transport and integral component of membrane localization
Small-scale	SNP	scf_000001_A_fumigatus_A1163	4806955	4806956	T->C	Y	AFUB_016880	4805466	4807318	NA	Has domain(s) with predicted role in transmembrane transport and integral component of membrane localization
Small-scale	SNP	scf_000001_A_fumigatus_A1163	4809839	4809840	A->G	Y	AFUB_016890	4808665	4809953	NA	Ortholog of A. nidulans FGSC A4 : AN1807, A. oryzae RIB40 : AO090009000305, Neosartorya fischeri NRRL 181 : NFIA_003200, Aspergillus wentii : Aspwe1_0108466 and Aspergillus versicolor : Aspve1_0123605
Small-scale	SNP	scf_000001_A_fumigatus_A1163	4810783	4810784	C->A	Y	AFUB_016900	4810583	4812937	NA	protein of unknown function
Small-scale	SNP	scf_000001_A_fumigatus_A1163	4810830	4810831	A->G	Y	AFUB_016900	4810583	4812937	NA	protein of unknown function
Small-scale	SNP	scf_000001_A_fumigatus_A1163	4811012	4811013	G->A	Y	AFUB_016900	4810583	4812937	NA	protein of unknown function
Small-scale	SNP	scf_000001_A_fumigatus_A1163	4811500	4811501	A->G	Y	AFUB_016900	4810583	4812937	NA	protein of unknown function
Small-scale	SNP	scf_000001_A_fumigatus_A1163	4811552	4811553	T->C	Y	AFUB_016900	4810583	4812937	NA	protein of unknown function
Small-scale	SNP	scf_000001_A_fumigatus_A1163	4811733	4811734	A->G	Y	AFUB_016900	4810583	4812937	NA	protein of unknown function
Small-scale	SNP	scf_000001_A_fumigatus_A1163	4811750	4811751	G->A	Y	AFUB_016900	4810583	4812937	NA	protein of unknown function
Small-scale	SNP	scf_000001_A_fumigatus_A1163	4812559	4812560	G->A	Y	AFUB_016900	4810583	4812937	NA	protein of unknown function
Small-scale	SNP	scf_000001_A_fumigatus_A1163	4813916	4813917	G->C	Y	AFUB_016910	4813735	4814649	NA	NA
Small-scale	SNP	scf_000001_A_fumigatus_A1163	4814395	4814396	G->A	Y	AFUB_016910	4813735	4814649	NA	NA
Small-scale	SNP	scf_000001_A_fumigatus_A1163	4815248	4815249	G->A	Y	AFUB_016920	4815072	4815334	NA	NA
Small-scale	SNP	scf_000001_A_fumigatus_A1163	4815266	4815267	C->A	Y	AFUB_016920	4815072	4815334	NA	NA
Small-scale	SNP	scf_000001_A_fumigatus_A1163	4815269	4815270	G->A	Y	AFUB_016920	4815072	4815334	NA	NA
Small-scale	SNP	scf_000001_A_fumigatus_A1163	4815310	4815311	C->T	Y	AFUB_016920	4815072	4815334	NA	NA
Small-scale	SNP	scf_000001_A_fumigatus_A1163	4820392	4820393	T->C	Y	AFUB_016930	4820174	4822555	NA	Ortholog of Aspergillus fumigatus A1163 : AFUB_016930
Small-scale	SNP	scf_000001_A_fumigatus_A1163	4823537	4823538	A->G	Y	AFUB_016940	4823255	4824064	NA	Putative GPI anchored protein
Small-scale	SNP	scf_000001_A_fumigatus_A1163	4823956	4823957	G->A	Y	AFUB_016940	4823255	4824064	NA	Putative GPI anchored protein
Small-scale	SNP	scf_000001_A_fumigatus_A1163	4829822	4829823	G->A	Y	AFUB_016950	4829274	4831810	NA	Has domain(s) with predicted transporter activity, role in transmembrane transport and membrane localization
Small-scale	SNP	scf_000001_A_fumigatus_A1163	4830189	4830190	G->A	Y	AFUB_016950	4829274	4831810	NA	Has domain(s) with predicted transporter activity, role in transmembrane transport and membrane localization
Small-scale	SNP	scf_000001_A_fumigatus_A1163	4830191	4830192	T->G	Y	AFUB_016950	4829274	4831810	NA	Has domain(s) with predicted transporter activity, role in transmembrane transport and membrane localization
Small-scale	SNP	scf_000001_A_fumigatus_A1163	4830602	4830603	C->T	Y	AFUB_016950	4829274	4831810	NA	Has domain(s) with predicted transporter activity, role in transmembrane transport and membrane localization
Small-scale	SNP	scf_000001_A_fumigatus_A1163	4830625	4830626	G->A	Y	AFUB_016950	4829274	4831810	NA	Has domain(s) with predicted transporter activity, role in transmembrane transport and membrane localization
Small-scale	SNP	scf_000001_A_fumigatus_A1163	4830688	4830689	G->A	Y	AFUB_016950	4829274	4831810	NA	Has domain(s) with predicted transporter activity, role in transmembrane transport and membrane localization
Small-scale	SNP	scf_000001_A_fumigatus_A1163	4834080	4834081	C->T	Y	AFUB_016960	4832599	4834348	NA	Has domain(s) with predicted monooxygenase activity, oxidoreductase activity, acting on paired donors, with incorporation or reduction of molecular oxygen activity and role in oxidation-reduction process
Small-scale	SNP	scf_000001_A_fumigatus_A1163	4834312	4834313	G->A	Y	AFUB_016960	4832599	4834348	NA	Has domain(s) with predicted monooxygenase activity, oxidoreductase activity, acting on paired donors, with incorporation or reduction of molecular oxygen activity and role in oxidation-reduction process
Small-scale	SNP	scf_000001_A_fumigatus_A1163	4837128	4837129	T->C	Y	AFUB_016980	4837129	4837693	NA	Ortholog of Neosartorya fischeri NRRL 181 : NFIA_007780, Aspergillus fumigatus A1163 : AFUB_016980 and Aspergillus clavatus NRRL 1 : ACLA_043410
Small-scale	SNP	scf_000001_A_fumigatus_A1163	4837269	4837270	G->A	Y	AFUB_016980	4837129	4837693	NA	Ortholog of Neosartorya fischeri NRRL 181 : NFIA_007780, Aspergillus fumigatus A1163 : AFUB_016980 and Aspergillus clavatus NRRL 1 : ACLA_043410
Small-scale	SNP	scf_000001_A_fumigatus_A1163	4837607	4837608	C->T	Y	AFUB_016980	4837129	4837693	NA	Ortholog of Neosartorya fischeri NRRL 181 : NFIA_007780, Aspergillus fumigatus A1163 : AFUB_016980 and Aspergillus clavatus NRRL 1 : ACLA_043410
Small-scale	SNP	scf_000001_A_fumigatus_A1163	4840360	4840361	T->G	Y	AFUB_016990	4839761	4840819	NA	Ortholog of Neosartorya fischeri NRRL 181 : NFIA_007760, Aspergillus fumigatus A1163 : AFUB_016990 and Aspergillus aculeatus ATCC16872 : Aacu16872_044542
Small-scale	SNP	scf_000001_A_fumigatus_A1163	4840404	4840405	T->C	Y	AFUB_016990	4839761	4840819	NA	Ortholog of Neosartorya fischeri NRRL 181 : NFIA_007760, Aspergillus fumigatus A1163 : AFUB_016990 and Aspergillus aculeatus ATCC16872 : Aacu16872_044542
Small-scale	SNP	scf_000001_A_fumigatus_A1163	4841517	4841518	G->A	Y	AFUB_017000	4841224	4842228	NA	Ortholog of A. oryzae RIB40 : AO090011000197, Aspergillus flavus NRRL 3357 : AFL2T_04974, Neosartorya fischeri NRRL 181 : NFIA_007750 and Aspergillus versicolor : Aspve1_0087209
Small-scale	SNP	scf_000001_A_fumigatus_A1163	4841601	4841602	G->A	Y	AFUB_017000	4841224	4842228	NA	Ortholog of A. oryzae RIB40 : AO090011000197, Aspergillus flavus NRRL 3357 : AFL2T_04974, Neosartorya fischeri NRRL 181 : NFIA_007750 and Aspergillus versicolor : Aspve1_0087209
Small-scale	SNP	scf_000001_A_fumigatus_A1163	4841728	4841729	A->G	Y	AFUB_017000	4841224	4842228	NA	Ortholog of A. oryzae RIB40 : AO090011000197, Aspergillus flavus NRRL 3357 : AFL2T_04974, Neosartorya fischeri NRRL 181 : NFIA_007750 and Aspergillus versicolor : Aspve1_0087209
Small-scale	SNP	scf_000001_A_fumigatus_A1163	4842107	4842108	A->G	Y	AFUB_017000	4841224	4842228	NA	Ortholog of A. oryzae RIB40 : AO090011000197, Aspergillus flavus NRRL 3357 : AFL2T_04974, Neosartorya fischeri NRRL 181 : NFIA_007750 and Aspergillus versicolor : Aspve1_0087209
Small-scale	SNP	scf_000001_A_fumigatus_A1163	4842132	4842133	T->C	Y	AFUB_017000	4841224	4842228	NA	Ortholog of A. oryzae RIB40 : AO090011000197, Aspergillus flavus NRRL 3357 : AFL2T_04974, Neosartorya fischeri NRRL 181 : NFIA_007750 and Aspergillus versicolor : Aspve1_0087209
Small-scale	SNP	scf_000001_A_fumigatus_A1163	4851417	4851418	T->C	Y	AFUB_017020	4850511	4853229	NA	Has domain(s) with predicted RNA polymerase II transcription factor activity, sequence-specific DNA binding, nucleic acid binding, zinc ion binding activity, role in regulation of transcription, DNA-templated and nucleus localization
Small-scale	SNP	scf_000001_A_fumigatus_A1163	4852818	4852819	C->T	Y	AFUB_017020	4850511	4853229	NA	Has domain(s) with predicted RNA polymerase II transcription factor activity, sequence-specific DNA binding, nucleic acid binding, zinc ion binding activity, role in regulation of transcription, DNA-templated and nucleus localization
Small-scale	SNP	scf_000001_A_fumigatus_A1163	4858826	4858827	C->A	Y	AFUB_017050	4856924	4859244	NA	Has domain(s) with predicted FAD binding, oxidoreductase activity and role in metabolic process
Small-scale	SNP	scf_000001_A_fumigatus_A1163	4863532	4863533	A->G	Y	AFUB_017070	4862818	4864318	NA	Has domain(s) with predicted UDP-N-acetylmuramate dehydrogenase activity, flavin adenine dinucleotide binding activity and role in oxidation-reduction process
Small-scale	SNP	scf_000002_A_fumigatus_A1163	5476	5477	T->C	Y	AFUB_017180	3011	6116	NA	Has domain(s) with predicted RNA polymerase II transcription factor activity, sequence-specific DNA binding, zinc ion binding activity, role in regulation of transcription, DNA-templated and nucleus localization
Small-scale	SNP	scf_000002_A_fumigatus_A1163	5810	5811	T->C	Y	AFUB_017180	3011	6116	NA	Has domain(s) with predicted RNA polymerase II transcription factor activity, sequence-specific DNA binding, zinc ion binding activity, role in regulation of transcription, DNA-templated and nucleus localization
Small-scale	SNP	scf_000002_A_fumigatus_A1163	15136	15137	C->T	Y	AFUB_017220	13784	15996	NA	Has domain(s) with predicted FAD binding, oxidoreductase activity and role in metabolic process
Small-scale	SNP	scf_000002_A_fumigatus_A1163	15137	15138	T->C	Y	AFUB_017220	13784	15996	NA	Has domain(s) with predicted FAD binding, oxidoreductase activity and role in metabolic process
Small-scale	SNP	scf_000002_A_fumigatus_A1163	23005	23006	A->T	Y	AFUB_017250	22021	23548	NA	Has domain(s) with predicted oxidoreductase activity, transferase activity, transferring acyl groups other than amino-acyl groups activity and role in oxidation-reduction process
Small-scale	SNP	scf_000002_A_fumigatus_A1163	26723	26724	T->C	Y	AFUB_017260	26512	28438	NA	Ortholog of A. nidulans FGSC A4 : AN2821, A. fumigatus Af293 : Afu2g17480, A. niger CBS 513.88 : An03g05360, An04g09420 and A. oryzae RIB40 : AO090102000063, AO090009000716
Small-scale	SNP	scf_000002_A_fumigatus_A1163	27806	27807	C->G	Y	AFUB_017260	26512	28438	NA	Ortholog of A. nidulans FGSC A4 : AN2821, A. fumigatus Af293 : Afu2g17480, A. niger CBS 513.88 : An03g05360, An04g09420 and A. oryzae RIB40 : AO090102000063, AO090009000716
Small-scale	SNP	scf_000002_A_fumigatus_A1163	30585	30586	C->T	Y	AFUB_017270	30279	30868	NA	Ortholog of A. nidulans FGSC A4 : AN0020, A. niger CBS 513.88 : An15g07480, Aspergillus versicolor : Aspve1_0365574, Aspergillus niger ATCC 1015 : 40853-mRNA and Aspergillus zonatus : Aspzo1_0077270
Small-scale	SNP	scf_000002_A_fumigatus_A1163	35676	35677	T->C	Y	AFUB_017290	34365	36141	NA	Ortholog of A. fumigatus Af293 : Afu7g06340, A. niger CBS 513.88 : An01g11590, An01g01670, A. oryzae RIB40 : AO090009000035 and Aspergillus wentii : Aspwe1_0027365, Aspwe1_0046529
Small-scale	SNP	scf_000002_A_fumigatus_A1163	36632	36633	T->C	Y	AFUB_017300	36332	38469	NA	Putative aminopeptidase
Small-scale	SNP	scf_000002_A_fumigatus_A1163	39356	39357	T->C	Y	AFUB_017310	39040	40546	NA	Ortholog(s) have mitochondrion localization
Small-scale	SNP	scf_000002_A_fumigatus_A1163	44804	44805	C->G	Y	AFUB_017340	44046	45675	NA	Ortholog of A. niger CBS 513.88 : An07g09290, A. oryzae RIB40 : AO090138000085, Aspergillus wentii : Aspwe1_0037953, Aspwe1_0041707 and Aspergillus sydowii : Aspsy1_0044683, Aspsy1_0048727, Aspsy1_0050979
Small-scale	SNP	scf_000002_A_fumigatus_A1163	51116	51117	T->C	Y	AFUB_017370	50721	52463	NA	Transmembrane amino acid transporter family protein
Small-scale	SNP	scf_000002_A_fumigatus_A1163	53384	53385	T->C	Y	AFUB_017380	52861	53994	erg3	Putative sterol delta 5,6-desaturase with a predicted role in ergosterol biosynthesis
Small-scale	SNP	scf_000002_A_fumigatus_A1163	54560	54561	T->G	Y	AFUB_017390	54378	55900	NA	Has domain(s) with predicted hydrolase activity, hydrolase activity, acting on carbon-nitrogen (but not peptide) bonds, in linear amidines activity and role in metabolic process
Small-scale	SNP	scf_000002_A_fumigatus_A1163	55237	55238	T->C	Y	AFUB_017390	54378	55900	NA	Has domain(s) with predicted hydrolase activity, hydrolase activity, acting on carbon-nitrogen (but not peptide) bonds, in linear amidines activity and role in metabolic process
Small-scale	SNP	scf_000002_A_fumigatus_A1163	55396	55397	C->T	Y	AFUB_017390	54378	55900	NA	Has domain(s) with predicted hydrolase activity, hydrolase activity, acting on carbon-nitrogen (but not peptide) bonds, in linear amidines activity and role in metabolic process
Small-scale	SNP	scf_000002_A_fumigatus_A1163	55440	55441	C->G	Y	AFUB_017390	54378	55900	NA	Has domain(s) with predicted hydrolase activity, hydrolase activity, acting on carbon-nitrogen (but not peptide) bonds, in linear amidines activity and role in metabolic process
Small-scale	SNP	scf_000002_A_fumigatus_A1163	55455	55456	C->A	Y	AFUB_017390	54378	55900	NA	Has domain(s) with predicted hydrolase activity, hydrolase activity, acting on carbon-nitrogen (but not peptide) bonds, in linear amidines activity and role in metabolic process
Small-scale	SNP	scf_000002_A_fumigatus_A1163	55465	55466	A->G	Y	AFUB_017390	54378	55900	NA	Has domain(s) with predicted hydrolase activity, hydrolase activity, acting on carbon-nitrogen (but not peptide) bonds, in linear amidines activity and role in metabolic process
Small-scale	SNP	scf_000002_A_fumigatus_A1163	55649	55650	C->T	Y	AFUB_017390	54378	55900	NA	Has domain(s) with predicted hydrolase activity, hydrolase activity, acting on carbon-nitrogen (but not peptide) bonds, in linear amidines activity and role in metabolic process
Small-scale	SNP	scf_000002_A_fumigatus_A1163	55710	55711	G->A	Y	AFUB_017390	54378	55900	NA	Has domain(s) with predicted hydrolase activity, hydrolase activity, acting on carbon-nitrogen (but not peptide) bonds, in linear amidines activity and role in metabolic process
Small-scale	SNP	scf_000002_A_fumigatus_A1163	56789	56790	G->A	Y	AFUB_017400	56046	58810	NA	protein of unknown function
Small-scale	SNP	scf_000002_A_fumigatus_A1163	56850	56851	A->C	Y	AFUB_017400	56046	58810	NA	protein of unknown function
Small-scale	SNP	scf_000002_A_fumigatus_A1163	58465	58466	C->T	Y	AFUB_017400	56046	58810	NA	protein of unknown function
Small-scale	SNP	scf_000002_A_fumigatus_A1163	58577	58578	T->C	Y	AFUB_017400	56046	58810	NA	protein of unknown function
Small-scale	SNP	scf_000002_A_fumigatus_A1163	58692	58693	C->T	Y	AFUB_017400	56046	58810	NA	protein of unknown function
Small-scale	SNP	scf_000002_A_fumigatus_A1163	58720	58721	C->T	Y	AFUB_017400	56046	58810	NA	protein of unknown function
Small-scale	SNP	scf_000002_A_fumigatus_A1163	60050	60051	A->G	Y	AFUB_017410	58959	61069	NA	Has domain(s) with predicted DNA binding, RNA polymerase II transcription factor activity, sequence-specific DNA binding, sequence-specific DNA binding and transcription factor activity, more
Small-scale	SNP	scf_000002_A_fumigatus_A1163	62700	62701	T->C	Y	AFUB_017420	62052	64716	NA	Ortholog of A. nidulans FGSC A4 : AN8361, A. niger CBS 513.88 : An12g10280, A. oryzae RIB40 : AO090701000625, Aspergillus wentii : Aspwe1_0168024 and Aspergillus sydowii : Aspsy1_0049880
Small-scale	SNP	scf_000002_A_fumigatus_A1163	71341	71342	G->C	Y	AFUB_017440	71135	72088	NA	Ortholog of Aspergillus glaucus : Aspgl1_0084499 and Aspergillus fumigatus A1163 : AFUB_017440
Small-scale	SNP	scf_000002_A_fumigatus_A1163	76410	76411	A->G	Y	AFUB_017460	75305	77412	NA	Has domain(s) with predicted carbon-nitrogen ligase activity, with glutamine as amido-N-donor activity
Small-scale	SNP	scf_000002_A_fumigatus_A1163	76921	76922	A->C	Y	AFUB_017460	75305	77412	NA	Has domain(s) with predicted carbon-nitrogen ligase activity, with glutamine as amido-N-donor activity
Small-scale	SNP	scf_000002_A_fumigatus_A1163	82436	82437	A->G	Y	AFUB_017490	82179	85527	exg9	Putative exo-beta-1,3-glucanase
Small-scale	SNP	scf_000002_A_fumigatus_A1163	83778	83779	A->G	Y	AFUB_017490	82179	85527	exg9	Putative exo-beta-1,3-glucanase
Small-scale	SNP	scf_000002_A_fumigatus_A1163	84129	84130	G->A	Y	AFUB_017490	82179	85527	exg9	Putative exo-beta-1,3-glucanase
Small-scale	SNP	scf_000002_A_fumigatus_A1163	84208	84209	G->A	Y	AFUB_017490	82179	85527	exg9	Putative exo-beta-1,3-glucanase
Small-scale	SNP	scf_000002_A_fumigatus_A1163	88795	88796	A->G	Y	AFUB_017510	88345	89990	NA	Putative hexokinase
Small-scale	SNP	scf_000002_A_fumigatus_A1163	94018	94019	A->G	Y	AFUB_017530	93239	94492	NA	Has domain(s) with predicted RNA polymerase II transcription factor activity, sequence-specific DNA binding, zinc ion binding activity, role in regulation of transcription, DNA-templated and nucleus localization
Small-scale	SNP	scf_000002_A_fumigatus_A1163	99765	99766	A->G	Y	AFUB_017550	99029	99915	NA	Has domain(s) with predicted hydrolase activity, hydrolyzing O-glycosyl compounds activity and role in carbohydrate metabolic process
Small-scale	SNP	scf_000002_A_fumigatus_A1163	100312	100313	G->C	Y	AFUB_017560	99992	101528	NA	Ortholog of A. nidulans FGSC A4 : AN8602, A. fumigatus Af293 : Afu6g09865, A. oryzae RIB40 : AO090023000371 and Neosartorya fischeri NRRL 181 : NFIA_032690, NFIA_055590
Small-scale	SNP	scf_000002_A_fumigatus_A1163	107555	107556	C->A	Y	AFUB_017580	106873	107845	NA	Ortholog(s) have extracellular region localization
Small-scale	SNP	scf_000002_A_fumigatus_A1163	107954	107955	C->G	Y	AFUB_017590	107897	108991	NA	Ortholog of Aspergillus fumigatus A1163 : AFUB_017590
Small-scale	SNP	scf_000002_A_fumigatus_A1163	112542	112543	G->A	Y	AFUB_017610	112332	113836	NA	Ortholog of Aspergillus fumigatus A1163 : AFUB_017610
Small-scale	SNP	scf_000002_A_fumigatus_A1163	112596	112597	A->G	Y	AFUB_017610	112332	113836	NA	Ortholog of Aspergillus fumigatus A1163 : AFUB_017610
Small-scale	SNP	scf_000002_A_fumigatus_A1163	113096	113097	C->T	Y	AFUB_017610	112332	113836	NA	Ortholog of Aspergillus fumigatus A1163 : AFUB_017610
Small-scale	SNP	scf_000002_A_fumigatus_A1163	113720	113721	T->C	Y	AFUB_017610	112332	113836	NA	Ortholog of Aspergillus fumigatus A1163 : AFUB_017610
Small-scale	SNP	scf_000002_A_fumigatus_A1163	116491	116492	C->A	Y	AFUB_017630	115269	116657	NA	Has domain(s) with predicted N-acetyltransferase activity
Small-scale	SNP	scf_000002_A_fumigatus_A1163	128315	128316	A->G	Y	AFUB_017690	127773	128926	NA	Has domain(s) with predicted hydrolase activity, hydrolase activity, acting on ester bonds activity and role in lipid metabolic process
Small-scale	SNP	scf_000002_A_fumigatus_A1163	128477	128478	C->T	Y	AFUB_017690	127773	128926	NA	Has domain(s) with predicted hydrolase activity, hydrolase activity, acting on ester bonds activity and role in lipid metabolic process
Small-scale	SNP	scf_000002_A_fumigatus_A1163	130838	130839	C->T	Y	AFUB_017700	129533	131776	NA	Has domain(s) with predicted beta-N-acetylhexosaminidase activity, catalytic activity, hydrolase activity, hydrolyzing O-glycosyl compounds activity and role in carbohydrate metabolic process
Small-scale	SNP	scf_000002_A_fumigatus_A1163	134387	134388	T->A	Y	AFUB_017710	133322	134904	NA	Putative secreted arabinosidase
Small-scale	SNP	scf_000002_A_fumigatus_A1163	137759	137760	T->A	Y	AFUB_017740	136869	140673	tcsB	Putative sensor histidine kinase/response regulator with homology to S. cerevisiae Sln1p
Small-scale	SNP	scf_000002_A_fumigatus_A1163	138762	138763	C->T	Y	AFUB_017740	136869	140673	tcsB	Putative sensor histidine kinase/response regulator with homology to S. cerevisiae Sln1p
Small-scale	SNP	scf_000002_A_fumigatus_A1163	140231	140232	G->A	Y	AFUB_017740	136869	140673	tcsB	Putative sensor histidine kinase/response regulator with homology to S. cerevisiae Sln1p
Small-scale	SNP	scf_000002_A_fumigatus_A1163	142755	142756	T->G	Y	AFUB_017750	141727	142970	NA	Putative protein kinase
Small-scale	SNP	scf_000002_A_fumigatus_A1163	155575	155576	G->A	Y	AFUB_017810	155281	156468	NA	Has domain(s) with predicted UDP-N-acetylmuramate dehydrogenase activity, flavin adenine dinucleotide binding activity and role in oxidation-reduction process
Small-scale	SNP	scf_000002_A_fumigatus_A1163	157343	157344	A->C	Y	AFUB_017820	156901	157986	NA	Ortholog of A. oryzae RIB40 : AO090701000367, Aspergillus flavus NRRL 3357 : AFL2T_06000, Neosartorya fischeri NRRL 181 : NFIA_033010 and Aspergillus wentii : Aspwe1_0029685
Small-scale	SNP	scf_000002_A_fumigatus_A1163	166786	166787	T->G	Y	AFUB_017860	165669	168045	NA	Has domain(s) with predicted role in transmembrane transport and integral component of membrane localization
Small-scale	SNP	scf_000002_A_fumigatus_A1163	178255	178256	A->G	Y	AFUB_017910	177761	180137	NA	Has domain(s) with predicted oxidoreductase activity and role in metabolic process
Small-scale	SNP	scf_000002_A_fumigatus_A1163	183443	183444	C->A	Y	AFUB_017920	183006	184630	NA	Ortholog(s) have endoplasmic reticulum localization
Small-scale	SNP	scf_000002_A_fumigatus_A1163	188128	188129	C->T	Y	AFUB_017940	187829	188417	NA	Ortholog of Aspergillus fumigatus A1163 : AFUB_017940
Small-scale	SNP	scf_000002_A_fumigatus_A1163	189714	189715	A->G	Y	AFUB_017950	189311	190705	NA	Ortholog of A. nidulans FGSC A4 : AN8478, A. oryzae RIB40 : AO090020000348, Neosartorya fischeri NRRL 181 : NFIA_099010, Aspergillus wentii : Aspwe1_0174900 and Aspergillus versicolor : Aspve1_0367643
Small-scale	SNP	scf_000002_A_fumigatus_A1163	189862	189863	C->G	Y	AFUB_017950	189311	190705	NA	Ortholog of A. nidulans FGSC A4 : AN8478, A. oryzae RIB40 : AO090020000348, Neosartorya fischeri NRRL 181 : NFIA_099010, Aspergillus wentii : Aspwe1_0174900 and Aspergillus versicolor : Aspve1_0367643
Small-scale	SNP	scf_000002_A_fumigatus_A1163	195476	195477	T->A	Y	AFUB_017980	194753	195923	NA	Ortholog of A. nidulans FGSC A4 : AN8943, A. fumigatus Af293 : Afu6g11560, A. niger CBS 513.88 : An01g11690, An03g01300 and A. oryzae RIB40 : AO090113000175, AO090023000422
Small-scale	SNP	scf_000002_A_fumigatus_A1163	195582	195583	C->G	Y	AFUB_017980	194753	195923	NA	Ortholog of A. nidulans FGSC A4 : AN8943, A. fumigatus Af293 : Afu6g11560, A. niger CBS 513.88 : An01g11690, An03g01300 and A. oryzae RIB40 : AO090113000175, AO090023000422
Small-scale	SNP	scf_000002_A_fumigatus_A1163	196547	196548	G->A	Y	AFUB_017990	196198	199400	NA	NB-ARC domain protein
Small-scale	SNP	scf_000002_A_fumigatus_A1163	196727	196728	T->G	Y	AFUB_017990	196198	199400	NA	NB-ARC domain protein
Small-scale	SNP	scf_000002_A_fumigatus_A1163	196753	196754	T->G	Y	AFUB_017990	196198	199400	NA	NB-ARC domain protein
Small-scale	SNP	scf_000002_A_fumigatus_A1163	196763	196764	T->C	Y	AFUB_017990	196198	199400	NA	NB-ARC domain protein
Small-scale	SNP	scf_000002_A_fumigatus_A1163	201521	201522	A->G	Y	AFUB_018000	200284	201529	abfII	Alpha-L-arabinofuranosidase
Small-scale	SNP	scf_000002_A_fumigatus_A1163	208830	208831	C->T	Y	AFUB_018020	207227	209252	NA	Ortholog of A. nidulans FGSC A4 : AN10483, AN2809, AN2115, AN0033, AN12460, A. fumigatus Af293 : Afu2g16560, Afu3g15340, Afu7g00460, Afu7g06360 and A. niger CBS 513.88 : An14g02830, An16g00830
Small-scale	SNP	scf_000002_A_fumigatus_A1163	211206	211207	T->C	Y	AFUB_018030	210075	213888	NA	NACHT domain protein
Small-scale	SNP	scf_000002_A_fumigatus_A1163	212661	212662	C->T	Y	AFUB_018030	210075	213888	NA	NACHT domain protein
Small-scale	SNP	scf_000002_A_fumigatus_A1163	213565	213566	C->T	Y	AFUB_018030	210075	213888	NA	NACHT domain protein
Small-scale	SNP	scf_000002_A_fumigatus_A1163	214436	214437	G->A	Y	AFUB_018050	214313	214879	NA	Ortholog of A. nidulans FGSC A4 : AN7635/binA, AN11904, A. fumigatus Af293 : Afu3g02216, Afu7g00610 and A. niger CBS 513.88 : An10g00560
Small-scale	SNP	scf_000002_A_fumigatus_A1163	226876	226877	T->C	Y	AFUB_018100	226422	228790	NA	Putative myo-inositol-phosphate synthase
Small-scale	SNP	scf_000002_A_fumigatus_A1163	231644	231645	A->G	Y	AFUB_018120	230693	232806	NA	Putative formaldehyde dehydrogenase
Small-scale	SNP	scf_000002_A_fumigatus_A1163	233615	233616	A->G	Y	AFUB_018130	233045	234137	NA	Ortholog(s) have protein transporter activity, unfolded protein binding activity and role in protein import into mitochondrial inner membrane, protein import into mitochondrial outer membrane, regulation of growth rate
Small-scale	SNP	scf_000002_A_fumigatus_A1163	240804	240805	C->T	Y	AFUB_018150	239836	241004	NA	Ortholog(s) have role in GPI anchor biosynthetic process, conidium formation, regulation of growth rate
Small-scale	SNP	scf_000002_A_fumigatus_A1163	246196	246197	A->G	Y	AFUB_018170	244912	248178	NA	Ortholog(s) have cytosol, nucleus localization
Small-scale	SNP	scf_000002_A_fumigatus_A1163	246402	246403	T->C	Y	AFUB_018170	244912	248178	NA	Ortholog(s) have cytosol, nucleus localization
Small-scale	SNP	scf_000002_A_fumigatus_A1163	247503	247504	G->A	Y	AFUB_018170	244912	248178	NA	Ortholog(s) have cytosol, nucleus localization
Small-scale	SNP	scf_000002_A_fumigatus_A1163	264674	264675	T->G	Y	AFUB_018250	264530	266939	gel1	1,3-beta-glucanosyltransferase with a role in elongation of 1,3-beta-glucan chains
Small-scale	SNP	scf_000002_A_fumigatus_A1163	268073	268074	C->A	Y	AFUB_018260	267194	270034	NA	Has domain(s) with predicted flavin adenine dinucleotide binding, oxidoreductase activity, acting on CH-OH group of donors activity and role in oxidation-reduction process
Small-scale	SNP	scf_000002_A_fumigatus_A1163	268365	268366	C->T	Y	AFUB_018260	267194	270034	NA	Has domain(s) with predicted flavin adenine dinucleotide binding, oxidoreductase activity, acting on CH-OH group of donors activity and role in oxidation-reduction process
Small-scale	SNP	scf_000002_A_fumigatus_A1163	268813	268814	T->C	Y	AFUB_018260	267194	270034	NA	Has domain(s) with predicted flavin adenine dinucleotide binding, oxidoreductase activity, acting on CH-OH group of donors activity and role in oxidation-reduction process
Small-scale	SNP	scf_000002_A_fumigatus_A1163	275383	275384	T->C	Y	AFUB_018280	272983	276207	NA	Ortholog(s) have cell division site, cell tip localization
Small-scale	SNP	scf_000002_A_fumigatus_A1163	277680	277681	T->C	Y	AFUB_018290	276440	278718	NA	Putative ATP dependent RNA helicase
Small-scale	SNP	scf_000002_A_fumigatus_A1163	287481	287482	A->C	Y	AFUB_018330	285982	288089	NA	Putative serine peptidase
Small-scale	SNP	scf_000002_A_fumigatus_A1163	289539	289540	C->T	Y	AFUB_018340	288487	293005	srbA	Sterol regulatory element binding protein (SREBP)
Small-scale	SNP	scf_000002_A_fumigatus_A1163	290303	290304	T->C	Y	AFUB_018340	288487	293005	srbA	Sterol regulatory element binding protein (SREBP)
Small-scale	SNP	scf_000002_A_fumigatus_A1163	296103	296104	T->C	Y	AFUB_018350	294487	296616	NA	Has domain(s) with predicted oxidoreductase activity and role in oxidation-reduction process
Small-scale	SNP	scf_000002_A_fumigatus_A1163	299001	299002	T->C	Y	AFUB_018370	298437	306998	NA	Putative polyketide synthase (PKS), encoded in a predicted secondary metabolite gene cluster
Small-scale	SNP	scf_000002_A_fumigatus_A1163	299002	299003	T->C	Y	AFUB_018370	298437	306998	NA	Putative polyketide synthase (PKS), encoded in a predicted secondary metabolite gene cluster
Small-scale	SNP	scf_000002_A_fumigatus_A1163	299246	299247	A->G	Y	AFUB_018370	298437	306998	NA	Putative polyketide synthase (PKS), encoded in a predicted secondary metabolite gene cluster
Small-scale	SNP	scf_000002_A_fumigatus_A1163	299286	299287	G->T	Y	AFUB_018370	298437	306998	NA	Putative polyketide synthase (PKS), encoded in a predicted secondary metabolite gene cluster
Small-scale	SNP	scf_000002_A_fumigatus_A1163	316268	316269	T->G	Y	AFUB_018420	316220	316585	NA	Ortholog of Aspergillus fumigatus A1163 : AFUB_018420
Small-scale	SNP	scf_000002_A_fumigatus_A1163	318885	318886	G->A	Y	AFUB_018430	316671	319048	NA	Ortholog(s) have NAD+ kinase activity, NADH kinase activity, role in NADP biosynthetic process, cellular iron ion homeostasis and cytoplasm, nucleus localization
Small-scale	SNP	scf_000002_A_fumigatus_A1163	318948	318949	T->C	Y	AFUB_018430	316671	319048	NA	Ortholog(s) have NAD+ kinase activity, NADH kinase activity, role in NADP biosynthetic process, cellular iron ion homeostasis and cytoplasm, nucleus localization
Small-scale	SNP	scf_000002_A_fumigatus_A1163	318997	318998	C->G	Y	AFUB_018430	316671	319048	NA	Ortholog(s) have NAD+ kinase activity, NADH kinase activity, role in NADP biosynthetic process, cellular iron ion homeostasis and cytoplasm, nucleus localization
Small-scale	SNP	scf_000002_A_fumigatus_A1163	323239	323240	C->A	Y	AFUB_018450	321468	323256	NA	Ortholog of A. niger CBS 513.88 : An03g05060, A. oryzae RIB40 : AO090701000423, Aspergillus wentii : Aspwe1_0543025 and Aspergillus sydowii : Aspsy1_0077314
Small-scale	SNP	scf_000002_A_fumigatus_A1163	328775	328776	G->T	Y	AFUB_018490	328632	329052	NA	Ortholog of A. nidulans FGSC A4 : AN3481, A. fumigatus Af293 : Afu1g02290, A. niger CBS 513.88 : An01g05960 and A. oryzae RIB40 : AO090026000175, AO090005000871, AO090026000055
Small-scale	SNP	scf_000002_A_fumigatus_A1163	333125	333126	T->G	Y	AFUB_018510	332262	335893	NA	Ortholog of A. nidulans FGSC A4 : AN7670, Aspergillus wentii : Aspwe1_0114055, Aspergillus versicolor : Aspve1_0030702 and Aspergillus clavatus NRRL 1 : ACLA_093480
Small-scale	SNP	scf_000002_A_fumigatus_A1163	341476	341477	C->T	Y	AFUB_018550	341093	341560	NA	Ortholog of Aspergillus fumigatus A1163 : AFUB_018550
Small-scale	SNP	scf_000002_A_fumigatus_A1163	341777	341778	G->A	Y	AFUB_018560	341656	342697	NA	Ortholog(s) have role in ribosomal large subunit biogenesis and nucleolus, preribosome, large subunit precursor localization
Small-scale	SNP	scf_000002_A_fumigatus_A1163	341886	341887	C->A	Y	AFUB_018560	341656	342697	NA	Ortholog(s) have role in ribosomal large subunit biogenesis and nucleolus, preribosome, large subunit precursor localization
Small-scale	SNP	scf_000002_A_fumigatus_A1163	343743	343744	C->G	Y	AFUB_018570	342888	344630	NA	Ortholog of Neosartorya fischeri NRRL 181 : NFIA_033780 and Aspergillus fumigatus A1163 : AFUB_018570
Small-scale	SNP	scf_000002_A_fumigatus_A1163	347273	347274	C->T	Y	AFUB_018580	344770	349549	NA	Has domain(s) with predicted ATP binding, ATPase activity, ATPase activity, coupled to transmembrane movement of substances, nucleoside-triphosphatase activity, nucleotide binding activity and role in transmembrane transport
Small-scale	SNP	scf_000002_A_fumigatus_A1163	347960	347961	T->C	Y	AFUB_018580	344770	349549	NA	Has domain(s) with predicted ATP binding, ATPase activity, ATPase activity, coupled to transmembrane movement of substances, nucleoside-triphosphatase activity, nucleotide binding activity and role in transmembrane transport
Small-scale	SNP	scf_000002_A_fumigatus_A1163	353033	353034	G->A	Y	AFUB_018600	352899	358187	NA	Ortholog(s) have role in ascospore formation, hyphal growth, response to oxidative stress, sporocarp development involved in sexual reproduction
Small-scale	SNP	scf_000002_A_fumigatus_A1163	353519	353520	C->T	Y	AFUB_018600	352899	358187	NA	Ortholog(s) have role in ascospore formation, hyphal growth, response to oxidative stress, sporocarp development involved in sexual reproduction
Small-scale	SNP	scf_000002_A_fumigatus_A1163	354333	354334	A->G	Y	AFUB_018600	352899	358187	NA	Ortholog(s) have role in ascospore formation, hyphal growth, response to oxidative stress, sporocarp development involved in sexual reproduction
Small-scale	SNP	scf_000002_A_fumigatus_A1163	357760	357761	G->T	Y	AFUB_018600	352899	358187	NA	Ortholog(s) have role in ascospore formation, hyphal growth, response to oxidative stress, sporocarp development involved in sexual reproduction
Small-scale	SNP	scf_000002_A_fumigatus_A1163	360330	360331	C->T	Y	AFUB_018620	360171	362312	NA	Ortholog of A. nidulans FGSC A4 : AN7680, A. niger CBS 513.88 : An03g04930, A. oryzae RIB40 : AO090701000796, Aspergillus wentii : Aspwe1_0052178 and Aspergillus sydowii : Aspsy1_0090365
Small-scale	SNP	scf_000002_A_fumigatus_A1163	364505	364506	G->A	Y	AFUB_018630	363991	365076	NA	Ortholog(s) have role in negative regulation of transcription from RNA polymerase III promoter, transcription factor TFIIIB complex assemblyNA
Small-scale	SNP	scf_000002_A_fumigatus_A1163	371251	371252	A->G	Y	AFUB_018660	371155	372714	nce102	Putative non-classical export protein
Small-scale	SNP	scf_000002_A_fumigatus_A1163	397770	397771	A->G	Y	AFUB_018740	394792	398301	NA	Ortholog of A. nidulans FGSC A4 : AN7686, A. niger CBS 513.88 : An03g04770, A. oryzae RIB40 : AO090701000780, Aspergillus wentii : Aspwe1_0028985 and Aspergillus sydowii : Aspsy1_0152669
Small-scale	SNP	scf_000002_A_fumigatus_A1163	408446	408447	C->T	Y	AFUB_018770	407630	410954	NA	Ortholog(s) have AMP-activated protein kinase activity, ARF guanyl-nucleotide exchange factor activity
Small-scale	SNP	scf_000002_A_fumigatus_A1163	408459	408460	G->A	Y	AFUB_018770	407630	410954	NA	Ortholog(s) have AMP-activated protein kinase activity, ARF guanyl-nucleotide exchange factor activity
Small-scale	SNP	scf_000002_A_fumigatus_A1163	408796	408797	T->C	Y	AFUB_018770	407630	410954	NA	Ortholog(s) have AMP-activated protein kinase activity, ARF guanyl-nucleotide exchange factor activity
Small-scale	SNP	scf_000002_A_fumigatus_A1163	412654	412655	T->C	Y	AFUB_018780	411923	413179	NA	Putative GPI anchored protein
Small-scale	SNP	scf_000002_A_fumigatus_A1163	412794	412795	G->C	Y	AFUB_018780	411923	413179	NA	Putative GPI anchored protein
Small-scale	SNP	scf_000002_A_fumigatus_A1163	415554	415555	A->G	Y	AFUB_018790	414794	416750	NA	Ortholog of A. nidulans FGSC A4 : AN4654, A. niger CBS 513.88 : An07g05260, Aspergillus sydowii : Aspsy1_0155851 and Aspergillus carbonarius ITEM 5010 : Acar5010_208321
Small-scale	SNP	scf_000002_A_fumigatus_A1163	419357	419358	C->T	Y	AFUB_018810	418116	419429	NA	Ortholog of A. niger CBS 513.88 : An14g03580, A. oryzae RIB40 : AO090011000423, Aspergillus wentii : Aspwe1_0112466, Aspergillus sydowii : Aspsy1_0091287 and Aspergillus terreus NIH2624 : ATET_05746
Small-scale	SNP	scf_000002_A_fumigatus_A1163	422790	422791	A->G	Y	AFUB_018830	421884	430266	NA	Ortholog of A. nidulans FGSC A4 : AN0391, AN7222, A. fumigatus Af293 : Afu1g01490, A. niger CBS 513.88 : An03g06670, An15g07300 and A. oryzae RIB40 : AO090010000045/aoiD, AO090102000259
Small-scale	SNP	scf_000002_A_fumigatus_A1163	425758	425759	G->A	Y	AFUB_018830	421884	430266	NA	Ortholog of A. nidulans FGSC A4 : AN0391, AN7222, A. fumigatus Af293 : Afu1g01490, A. niger CBS 513.88 : An03g06670, An15g07300 and A. oryzae RIB40 : AO090010000045/aoiD, AO090102000259
Small-scale	SNP	scf_000002_A_fumigatus_A1163	427699	427700	C->T	Y	AFUB_018830	421884	430266	NA	Ortholog of A. nidulans FGSC A4 : AN0391, AN7222, A. fumigatus Af293 : Afu1g01490, A. niger CBS 513.88 : An03g06670, An15g07300 and A. oryzae RIB40 : AO090010000045/aoiD, AO090102000259
Small-scale	SNP	scf_000002_A_fumigatus_A1163	428150	428151	A->G	Y	AFUB_018830	421884	430266	NA	Ortholog of A. nidulans FGSC A4 : AN0391, AN7222, A. fumigatus Af293 : Afu1g01490, A. niger CBS 513.88 : An03g06670, An15g07300 and A. oryzae RIB40 : AO090010000045/aoiD, AO090102000259
Small-scale	SNP	scf_000002_A_fumigatus_A1163	447325	447326	T->C	Y	AFUB_018890	444707	448777	NA	Has domain(s) with predicted nucleic acid binding, nucleotide binding activity, role in RNA processing and intracellular localization
Small-scale	SNP	scf_000002_A_fumigatus_A1163	459199	459200	T->G	Y	AFUB_018960	457785	461710	chsA	Putative class I chitin synthase
Small-scale	SNP	scf_000002_A_fumigatus_A1163	460356	460357	A->G	Y	AFUB_018960	457785	461710	chsA	Putative class I chitin synthase
Small-scale	SNP	scf_000002_A_fumigatus_A1163	460965	460966	T->C	Y	AFUB_018960	457785	461710	chsA	Putative class I chitin synthase
Small-scale	SNP	scf_000002_A_fumigatus_A1163	461005	461006	C->T	Y	AFUB_018960	457785	461710	chsA	Putative class I chitin synthase
Small-scale	SNP	scf_000002_A_fumigatus_A1163	461037	461038	C->A	Y	AFUB_018960	457785	461710	chsA	Putative class I chitin synthase
Small-scale	SNP	scf_000002_A_fumigatus_A1163	461595	461596	T->G	Y	AFUB_018960	457785	461710	chsA	Putative class I chitin synthase
Small-scale	SNP	scf_000002_A_fumigatus_A1163	461614	461615	G->A	Y	AFUB_018960	457785	461710	chsA	Putative class I chitin synthase
Small-scale	SNP	scf_000002_A_fumigatus_A1163	462099	462100	T->C	Y	AFUB_018970	461949	463373	ltpA	Has domain(s) with predicted protein tyrosine phosphatase activity and role in protein dephosphorylation
Small-scale	SNP	scf_000002_A_fumigatus_A1163	462117	462118	C->T	Y	AFUB_018970	461949	463373	ltpA	Has domain(s) with predicted protein tyrosine phosphatase activity and role in protein dephosphorylation
Small-scale	SNP	scf_000002_A_fumigatus_A1163	462211	462212	A->C	Y	AFUB_018970	461949	463373	ltpA	Has domain(s) with predicted protein tyrosine phosphatase activity and role in protein dephosphorylation
Small-scale	SNP	scf_000002_A_fumigatus_A1163	463143	463144	C->A	Y	AFUB_018970	461949	463373	ltpA	Has domain(s) with predicted protein tyrosine phosphatase activity and role in protein dephosphorylation
Small-scale	SNP	scf_000002_A_fumigatus_A1163	463775	463776	C->T	Y	AFUB_018980	463631	464404	NA	Ortholog(s) have 2-octoprenyl-3-methyl-6-methoxy-1,4-benzoquinone hydroxylase activity, role in ubiquinone biosynthetic process and mitochondrial inner membrane localization
Small-scale	SNP	scf_000002_A_fumigatus_A1163	464355	464356	T->C	Y	AFUB_018980	463631	464404	NA	Ortholog(s) have 2-octoprenyl-3-methyl-6-methoxy-1,4-benzoquinone hydroxylase activity, role in ubiquinone biosynthetic process and mitochondrial inner membrane localization
Small-scale	SNP	scf_000002_A_fumigatus_A1163	464374	464375	A->C	Y	AFUB_018980	463631	464404	NA	Ortholog(s) have 2-octoprenyl-3-methyl-6-methoxy-1,4-benzoquinone hydroxylase activity, role in ubiquinone biosynthetic process and mitochondrial inner membrane localization
Small-scale	SNP	scf_000002_A_fumigatus_A1163	464376	464377	T->C	Y	AFUB_018980	463631	464404	NA	Ortholog(s) have 2-octoprenyl-3-methyl-6-methoxy-1,4-benzoquinone hydroxylase activity, role in ubiquinone biosynthetic process and mitochondrial inner membrane localization
Small-scale	SNP	scf_000002_A_fumigatus_A1163	464747	464748	T->C	Y	AFUB_018990	464674	467318	NA	Ortholog(s) have RNA binding, RNA polymerase II C-terminal domain phosphoserine binding, transcription factor activity, RNA polymerase II transcription factor binding activity
Small-scale	SNP	scf_000002_A_fumigatus_A1163	464781	464782	G->C	Y	AFUB_018990	464674	467318	NA	Ortholog(s) have RNA binding, RNA polymerase II C-terminal domain phosphoserine binding, transcription factor activity, RNA polymerase II transcription factor binding activity
Small-scale	SNP	scf_000002_A_fumigatus_A1163	465248	465249	C->T	Y	AFUB_018990	464674	467318	NA	Ortholog(s) have RNA binding, RNA polymerase II C-terminal domain phosphoserine binding, transcription factor activity, RNA polymerase II transcription factor binding activity
Small-scale	SNP	scf_000002_A_fumigatus_A1163	465274	465275	G->A	Y	AFUB_018990	464674	467318	NA	Ortholog(s) have RNA binding, RNA polymerase II C-terminal domain phosphoserine binding, transcription factor activity, RNA polymerase II transcription factor binding activity
Small-scale	SNP	scf_000002_A_fumigatus_A1163	465974	465975	T->C	Y	AFUB_018990	464674	467318	NA	Ortholog(s) have RNA binding, RNA polymerase II C-terminal domain phosphoserine binding, transcription factor activity, RNA polymerase II transcription factor binding activity
Small-scale	SNP	scf_000002_A_fumigatus_A1163	466340	466341	A->C	Y	AFUB_018990	464674	467318	NA	Ortholog(s) have RNA binding, RNA polymerase II C-terminal domain phosphoserine binding, transcription factor activity, RNA polymerase II transcription factor binding activity
Small-scale	SNP	scf_000002_A_fumigatus_A1163	467070	467071	G->C	Y	AFUB_018990	464674	467318	NA	Ortholog(s) have RNA binding, RNA polymerase II C-terminal domain phosphoserine binding, transcription factor activity, RNA polymerase II transcription factor binding activity
Small-scale	SNP	scf_000002_A_fumigatus_A1163	467094	467095	A->G	Y	AFUB_018990	464674	467318	NA	Ortholog(s) have RNA binding, RNA polymerase II C-terminal domain phosphoserine binding, transcription factor activity, RNA polymerase II transcription factor binding activity
Small-scale	SNP	scf_000002_A_fumigatus_A1163	467183	467184	G->A	Y	AFUB_018990	464674	467318	NA	Ortholog(s) have RNA binding, RNA polymerase II C-terminal domain phosphoserine binding, transcription factor activity, RNA polymerase II transcription factor binding activity
Small-scale	SNP	scf_000002_A_fumigatus_A1163	467499	467500	C->T	Y	AFUB_019000	467464	471726	NA	Ortholog of A. nidulans FGSC A4 : AN4571, A. niger CBS 513.88 : An07g05630, A. oryzae RIB40 : AO090011000458, Aspergillus wentii : Aspwe1_0113502 and Aspergillus sydowii : Aspsy1_0104343
Small-scale	SNP	scf_000002_A_fumigatus_A1163	468076	468077	C->T	Y	AFUB_019000	467464	471726	NA	Ortholog of A. nidulans FGSC A4 : AN4571, A. niger CBS 513.88 : An07g05630, A. oryzae RIB40 : AO090011000458, Aspergillus wentii : Aspwe1_0113502 and Aspergillus sydowii : Aspsy1_0104343
Small-scale	SNP	scf_000002_A_fumigatus_A1163	468117	468118	C->T	Y	AFUB_019000	467464	471726	NA	Ortholog of A. nidulans FGSC A4 : AN4571, A. niger CBS 513.88 : An07g05630, A. oryzae RIB40 : AO090011000458, Aspergillus wentii : Aspwe1_0113502 and Aspergillus sydowii : Aspsy1_0104343
Small-scale	SNP	scf_000002_A_fumigatus_A1163	468145	468146	A->G	Y	AFUB_019000	467464	471726	NA	Ortholog of A. nidulans FGSC A4 : AN4571, A. niger CBS 513.88 : An07g05630, A. oryzae RIB40 : AO090011000458, Aspergillus wentii : Aspwe1_0113502 and Aspergillus sydowii : Aspsy1_0104343
Small-scale	SNP	scf_000002_A_fumigatus_A1163	468204	468205	C->T	Y	AFUB_019000	467464	471726	NA	Ortholog of A. nidulans FGSC A4 : AN4571, A. niger CBS 513.88 : An07g05630, A. oryzae RIB40 : AO090011000458, Aspergillus wentii : Aspwe1_0113502 and Aspergillus sydowii : Aspsy1_0104343
Small-scale	SNP	scf_000002_A_fumigatus_A1163	468305	468306	C->T	Y	AFUB_019000	467464	471726	NA	Ortholog of A. nidulans FGSC A4 : AN4571, A. niger CBS 513.88 : An07g05630, A. oryzae RIB40 : AO090011000458, Aspergillus wentii : Aspwe1_0113502 and Aspergillus sydowii : Aspsy1_0104343
Small-scale	SNP	scf_000002_A_fumigatus_A1163	468306	468307	C->T	Y	AFUB_019000	467464	471726	NA	Ortholog of A. nidulans FGSC A4 : AN4571, A. niger CBS 513.88 : An07g05630, A. oryzae RIB40 : AO090011000458, Aspergillus wentii : Aspwe1_0113502 and Aspergillus sydowii : Aspsy1_0104343
Small-scale	SNP	scf_000002_A_fumigatus_A1163	468459	468460	C->T	Y	AFUB_019000	467464	471726	NA	Ortholog of A. nidulans FGSC A4 : AN4571, A. niger CBS 513.88 : An07g05630, A. oryzae RIB40 : AO090011000458, Aspergillus wentii : Aspwe1_0113502 and Aspergillus sydowii : Aspsy1_0104343
Small-scale	SNP	scf_000002_A_fumigatus_A1163	469387	469388	G->A	Y	AFUB_019000	467464	471726	NA	Ortholog of A. nidulans FGSC A4 : AN4571, A. niger CBS 513.88 : An07g05630, A. oryzae RIB40 : AO090011000458, Aspergillus wentii : Aspwe1_0113502 and Aspergillus sydowii : Aspsy1_0104343
Small-scale	SNP	scf_000002_A_fumigatus_A1163	469409	469410	C->A	Y	AFUB_019000	467464	471726	NA	Ortholog of A. nidulans FGSC A4 : AN4571, A. niger CBS 513.88 : An07g05630, A. oryzae RIB40 : AO090011000458, Aspergillus wentii : Aspwe1_0113502 and Aspergillus sydowii : Aspsy1_0104343
Small-scale	SNP	scf_000002_A_fumigatus_A1163	469470	469471	G->A	Y	AFUB_019000	467464	471726	NA	Ortholog of A. nidulans FGSC A4 : AN4571, A. niger CBS 513.88 : An07g05630, A. oryzae RIB40 : AO090011000458, Aspergillus wentii : Aspwe1_0113502 and Aspergillus sydowii : Aspsy1_0104343
Small-scale	SNP	scf_000002_A_fumigatus_A1163	469877	469878	C->A	Y	AFUB_019000	467464	471726	NA	Ortholog of A. nidulans FGSC A4 : AN4571, A. niger CBS 513.88 : An07g05630, A. oryzae RIB40 : AO090011000458, Aspergillus wentii : Aspwe1_0113502 and Aspergillus sydowii : Aspsy1_0104343
Small-scale	SNP	scf_000002_A_fumigatus_A1163	470079	470080	G->A	Y	AFUB_019000	467464	471726	NA	Ortholog of A. nidulans FGSC A4 : AN4571, A. niger CBS 513.88 : An07g05630, A. oryzae RIB40 : AO090011000458, Aspergillus wentii : Aspwe1_0113502 and Aspergillus sydowii : Aspsy1_0104343
Small-scale	SNP	scf_000002_A_fumigatus_A1163	471602	471603	G->T	Y	AFUB_019000	467464	471726	NA	Ortholog of A. nidulans FGSC A4 : AN4571, A. niger CBS 513.88 : An07g05630, A. oryzae RIB40 : AO090011000458, Aspergillus wentii : Aspwe1_0113502 and Aspergillus sydowii : Aspsy1_0104343
Small-scale	SNP	scf_000002_A_fumigatus_A1163	471953	471954	C->T	Y	AFUB_019010	471828	475983	NA	Ortholog(s) have cytosol localization
Small-scale	SNP	scf_000002_A_fumigatus_A1163	471994	471995	C->T	Y	AFUB_019010	471828	475983	NA	Ortholog(s) have cytosol localization
Small-scale	SNP	scf_000002_A_fumigatus_A1163	473032	473033	A->T	Y	AFUB_019010	471828	475983	NA	Ortholog(s) have cytosol localization
Small-scale	SNP	scf_000002_A_fumigatus_A1163	473144	473145	T->A	Y	AFUB_019010	471828	475983	NA	Ortholog(s) have cytosol localization
Small-scale	SNP	scf_000002_A_fumigatus_A1163	475438	475439	T->A	Y	AFUB_019010	471828	475983	NA	Ortholog(s) have cytosol localization
Small-scale	SNP	scf_000002_A_fumigatus_A1163	479005	479006	A->T	Y	AFUB_019030	478711	480610	NA	Has domain(s) with predicted FAD binding, oxidoreductase activity and role in metabolic process
Small-scale	SNP	scf_000002_A_fumigatus_A1163	479810	479811	A->G	Y	AFUB_019030	478711	480610	NA	Has domain(s) with predicted FAD binding, oxidoreductase activity and role in metabolic process
Small-scale	SNP	scf_000002_A_fumigatus_A1163	480015	480016	A->G	Y	AFUB_019030	478711	480610	NA	Has domain(s) with predicted FAD binding, oxidoreductase activity and role in metabolic process
Small-scale	SNP	scf_000002_A_fumigatus_A1163	481539	481540	A->G	Y	AFUB_019040	480651	482000	NA	Has domain(s) with predicted prenyltransferase activity and integral component of membrane localization
Small-scale	SNP	scf_000002_A_fumigatus_A1163	481661	481662	T->C	Y	AFUB_019040	480651	482000	NA	Has domain(s) with predicted prenyltransferase activity and integral component of membrane localization
Small-scale	SNP	scf_000002_A_fumigatus_A1163	481747	481748	A->C	Y	AFUB_019040	480651	482000	NA	Has domain(s) with predicted prenyltransferase activity and integral component of membrane localization
Small-scale	SNP	scf_000002_A_fumigatus_A1163	481818	481819	C->T	Y	AFUB_019040	480651	482000	NA	Has domain(s) with predicted prenyltransferase activity and integral component of membrane localization
Small-scale	SNP	scf_000002_A_fumigatus_A1163	481865	481866	C->A	Y	AFUB_019040	480651	482000	NA	Has domain(s) with predicted prenyltransferase activity and integral component of membrane localization
Small-scale	SNP	scf_000002_A_fumigatus_A1163	483833	483834	C->A	Y	AFUB_019050	482994	485906	NA	Ortholog of A. nidulans FGSC A4 : AN4582, A. niger CBS 513.88 : An07g05780, A. oryzae RIB40 : AO090011000467, Aspergillus wentii : Aspwe1_0029040 and Aspergillus sydowii : Aspsy1_1095743
Small-scale	SNP	scf_000002_A_fumigatus_A1163	484416	484417	G->A	Y	AFUB_019050	482994	485906	NA	Ortholog of A. nidulans FGSC A4 : AN4582, A. niger CBS 513.88 : An07g05780, A. oryzae RIB40 : AO090011000467, Aspergillus wentii : Aspwe1_0029040 and Aspergillus sydowii : Aspsy1_1095743
Small-scale	SNP	scf_000002_A_fumigatus_A1163	484617	484618	A->G	Y	AFUB_019050	482994	485906	NA	Ortholog of A. nidulans FGSC A4 : AN4582, A. niger CBS 513.88 : An07g05780, A. oryzae RIB40 : AO090011000467, Aspergillus wentii : Aspwe1_0029040 and Aspergillus sydowii : Aspsy1_1095743
Small-scale	SNP	scf_000002_A_fumigatus_A1163	484847	484848	C->G	Y	AFUB_019050	482994	485906	NA	Ortholog of A. nidulans FGSC A4 : AN4582, A. niger CBS 513.88 : An07g05780, A. oryzae RIB40 : AO090011000467, Aspergillus wentii : Aspwe1_0029040 and Aspergillus sydowii : Aspsy1_1095743
Small-scale	SNP	scf_000002_A_fumigatus_A1163	485034	485035	C->A	Y	AFUB_019050	482994	485906	NA	Ortholog of A. nidulans FGSC A4 : AN4582, A. niger CBS 513.88 : An07g05780, A. oryzae RIB40 : AO090011000467, Aspergillus wentii : Aspwe1_0029040 and Aspergillus sydowii : Aspsy1_1095743
Small-scale	SNP	scf_000002_A_fumigatus_A1163	485466	485467	G->A	Y	AFUB_019050	482994	485906	NA	Ortholog of A. nidulans FGSC A4 : AN4582, A. niger CBS 513.88 : An07g05780, A. oryzae RIB40 : AO090011000467, Aspergillus wentii : Aspwe1_0029040 and Aspergillus sydowii : Aspsy1_1095743
Small-scale	SNP	scf_000002_A_fumigatus_A1163	485472	485473	T->C	Y	AFUB_019050	482994	485906	NA	Ortholog of A. nidulans FGSC A4 : AN4582, A. niger CBS 513.88 : An07g05780, A. oryzae RIB40 : AO090011000467, Aspergillus wentii : Aspwe1_0029040 and Aspergillus sydowii : Aspsy1_1095743
Small-scale	SNP	scf_000002_A_fumigatus_A1163	485838	485839	G->A	Y	AFUB_019050	482994	485906	NA	Ortholog of A. nidulans FGSC A4 : AN4582, A. niger CBS 513.88 : An07g05780, A. oryzae RIB40 : AO090011000467, Aspergillus wentii : Aspwe1_0029040 and Aspergillus sydowii : Aspsy1_1095743
Small-scale	SNP	scf_000002_A_fumigatus_A1163	486189	486190	G->A	Y	AFUB_019060	486141	488745	NA	Has domain(s) with predicted DNA binding, RNA binding activity and role in RNA metabolic process
Small-scale	SNP	scf_000002_A_fumigatus_A1163	486201	486202	T->G	Y	AFUB_019060	486141	488745	NA	Has domain(s) with predicted DNA binding, RNA binding activity and role in RNA metabolic process
Small-scale	SNP	scf_000002_A_fumigatus_A1163	486610	486611	C->T	Y	AFUB_019060	486141	488745	NA	Has domain(s) with predicted DNA binding, RNA binding activity and role in RNA metabolic process
Small-scale	SNP	scf_000002_A_fumigatus_A1163	487104	487105	A->G	Y	AFUB_019060	486141	488745	NA	Has domain(s) with predicted DNA binding, RNA binding activity and role in RNA metabolic process
Small-scale	SNP	scf_000002_A_fumigatus_A1163	487301	487302	C->T	Y	AFUB_019060	486141	488745	NA	Has domain(s) with predicted DNA binding, RNA binding activity and role in RNA metabolic process
Small-scale	SNP	scf_000002_A_fumigatus_A1163	487755	487756	T->C	Y	AFUB_019060	486141	488745	NA	Has domain(s) with predicted DNA binding, RNA binding activity and role in RNA metabolic process
Small-scale	SNP	scf_000002_A_fumigatus_A1163	487810	487811	G->T	Y	AFUB_019060	486141	488745	NA	Has domain(s) with predicted DNA binding, RNA binding activity and role in RNA metabolic process
Small-scale	SNP	scf_000002_A_fumigatus_A1163	487885	487886	C->T	Y	AFUB_019060	486141	488745	NA	Has domain(s) with predicted DNA binding, RNA binding activity and role in RNA metabolic process
Small-scale	SNP	scf_000002_A_fumigatus_A1163	487891	487892	G->A	Y	AFUB_019060	486141	488745	NA	Has domain(s) with predicted DNA binding, RNA binding activity and role in RNA metabolic process
Small-scale	SNP	scf_000002_A_fumigatus_A1163	488698	488699	T->C	Y	AFUB_019060	486141	488745	NA	Has domain(s) with predicted DNA binding, RNA binding activity and role in RNA metabolic process
Small-scale	SNP	scf_000002_A_fumigatus_A1163	489160	489161	A->G	Y	AFUB_019070	489114	489607	NA	Ortholog(s) have nucleolus localization
Small-scale	SNP	scf_000002_A_fumigatus_A1163	490160	490161	C->T	Y	AFUB_019080	490121	491740	NA	Has domain(s) with predicted role in peroxisome inheritance and extrinsic component of intraperoxisomal membrane localization
Small-scale	SNP	scf_000002_A_fumigatus_A1163	490178	490179	G->A	Y	AFUB_019080	490121	491740	NA	Has domain(s) with predicted role in peroxisome inheritance and extrinsic component of intraperoxisomal membrane localization
Small-scale	SNP	scf_000002_A_fumigatus_A1163	490517	490518	T->C	Y	AFUB_019080	490121	491740	NA	Has domain(s) with predicted role in peroxisome inheritance and extrinsic component of intraperoxisomal membrane localization
Small-scale	SNP	scf_000002_A_fumigatus_A1163	490636	490637	A->G	Y	AFUB_019080	490121	491740	NA	Has domain(s) with predicted role in peroxisome inheritance and extrinsic component of intraperoxisomal membrane localization
Small-scale	SNP	scf_000002_A_fumigatus_A1163	490751	490752	C->A	Y	AFUB_019080	490121	491740	NA	Has domain(s) with predicted role in peroxisome inheritance and extrinsic component of intraperoxisomal membrane localization
Small-scale	SNP	scf_000002_A_fumigatus_A1163	492398	492399	T->G	Y	AFUB_019090	492176	494014	usgS	Putative transmembrane domain protein
Small-scale	SNP	scf_000002_A_fumigatus_A1163	493048	493049	G->A	Y	AFUB_019090	492176	494014	usgS	Putative transmembrane domain protein
Small-scale	SNP	scf_000002_A_fumigatus_A1163	494411	494412	G->T	Y	AFUB_019100	494170	495772	fmdS	Ortholog(s) have cytosol, extracellular region, nucleus localization
Small-scale	SNP	scf_000002_A_fumigatus_A1163	496362	496363	T->A	Y	AFUB_019110	496035	497644	NA	Amadoriase (fructosyl amine: oxygen oxidoreductase), isozyme I, FAD-linked enzyme involved in oxidative deglycation of glycated amino acids
Small-scale	SNP	scf_000002_A_fumigatus_A1163	496373	496374	G->T	Y	AFUB_019110	496035	497644	NA	Amadoriase (fructosyl amine: oxygen oxidoreductase), isozyme I, FAD-linked enzyme involved in oxidative deglycation of glycated amino acids
Small-scale	SNP	scf_000002_A_fumigatus_A1163	499671	499672	C->T	Y	AFUB_019120	498261	500346	NA	Has domain(s) with predicted role in transmembrane transport and integral component of membrane localization
Small-scale	SNP	scf_000002_A_fumigatus_A1163	500803	500804	T->C	Y	AFUB_019130	500561	502353	cyp7	Putative peptidyl-prolyl cis-trans isomerase
Small-scale	SNP	scf_000002_A_fumigatus_A1163	501410	501411	C->T	Y	AFUB_019130	500561	502353	cyp7	Putative peptidyl-prolyl cis-trans isomerase
Small-scale	SNP	scf_000002_A_fumigatus_A1163	502093	502094	G->T	Y	AFUB_019130	500561	502353	cyp7	Putative peptidyl-prolyl cis-trans isomerase
Small-scale	SNP	scf_000002_A_fumigatus_A1163	502103	502104	G->A	Y	AFUB_019130	500561	502353	cyp7	Putative peptidyl-prolyl cis-trans isomerase
Small-scale	SNP	scf_000002_A_fumigatus_A1163	503325	503326	A->G	Y	AFUB_019140	502610	503397	NA	Ortholog(s) have D-leucyl-tRNA(Leu) deacylase activity, D-tyrosyl-tRNA(Tyr) deacylase activity, role in D-leucine catabolic process, D-tyrosine catabolic process, tRNA metabolic process and cytosol, nucleus localization
Small-scale	SNP	scf_000002_A_fumigatus_A1163	504183	504184	T->C	Y	AFUB_019150	503851	506640	NA	Ortholog(s) have cytosol localization
Small-scale	SNP	scf_000002_A_fumigatus_A1163	504321	504322	T->C	Y	AFUB_019150	503851	506640	NA	Ortholog(s) have cytosol localization
Small-scale	SNP	scf_000002_A_fumigatus_A1163	505599	505600	G->A	Y	AFUB_019150	503851	506640	NA	Ortholog(s) have cytosol localization
Small-scale	SNP	scf_000002_A_fumigatus_A1163	505789	505790	A->G	Y	AFUB_019150	503851	506640	NA	Ortholog(s) have cytosol localization
Small-scale	SNP	scf_000002_A_fumigatus_A1163	505948	505949	A->G	Y	AFUB_019150	503851	506640	NA	Ortholog(s) have cytosol localization
Small-scale	SNP	scf_000002_A_fumigatus_A1163	507733	507734	C->T	Y	AFUB_019160	507578	509782	NA	protein of unknown function
Small-scale	SNP	scf_000002_A_fumigatus_A1163	508106	508107	C->G	Y	AFUB_019160	507578	509782	NA	protein of unknown function
Small-scale	SNP	scf_000002_A_fumigatus_A1163	508120	508121	T->C	Y	AFUB_019160	507578	509782	NA	protein of unknown function
Small-scale	SNP	scf_000002_A_fumigatus_A1163	508124	508125	G->A	Y	AFUB_019160	507578	509782	NA	protein of unknown function
Small-scale	SNP	scf_000002_A_fumigatus_A1163	508512	508513	G->T	Y	AFUB_019160	507578	509782	NA	protein of unknown function
Small-scale	SNP	scf_000002_A_fumigatus_A1163	509089	509090	C->T	Y	AFUB_019160	507578	509782	NA	protein of unknown function
Small-scale	SNP	scf_000002_A_fumigatus_A1163	509116	509117	C->G	Y	AFUB_019160	507578	509782	NA	protein of unknown function
Small-scale	SNP	scf_000002_A_fumigatus_A1163	517528	517529	G->A	Y	AFUB_019190	516942	519987	NA	Sugar transporter
Small-scale	SNP	scf_000002_A_fumigatus_A1163	522402	522403	C->T	Y	AFUB_019200	521427	524057	NA	Ortholog(s) have phosphopentomutase activity, role in guanosine catabolic process, inosine catabolic process, purine ribonucleoside salvage and cytosol, nucleus localization
Small-scale	SNP	scf_000002_A_fumigatus_A1163	522902	522903	T->A	Y	AFUB_019200	521427	524057	NA	Ortholog(s) have phosphopentomutase activity, role in guanosine catabolic process, inosine catabolic process, purine ribonucleoside salvage and cytosol, nucleus localization
Small-scale	SNP	scf_000002_A_fumigatus_A1163	526599	526600	C->T	Y	AFUB_019220	526362	528476	NA	Ortholog of A. nidulans FGSC A4 : AN4593, A. niger CBS 513.88 : An09g03850, A. oryzae RIB40 : AO090011000489, Aspergillus wentii : Aspwe1_0041741 and Aspergillus sydowii : Aspsy1_0155688
Small-scale	SNP	scf_000002_A_fumigatus_A1163	528388	528389	T->C	Y	AFUB_019220	526362	528476	NA	Ortholog of A. nidulans FGSC A4 : AN4593, A. niger CBS 513.88 : An09g03850, A. oryzae RIB40 : AO090011000489, Aspergillus wentii : Aspwe1_0041741 and Aspergillus sydowii : Aspsy1_0155688
Small-scale	SNP	scf_000002_A_fumigatus_A1163	532284	532285	A->G	Y	AFUB_019250	532223	533552	NA	Ortholog(s) have cytosol, nuclear periphery, nuclear pore, spindle pole body localization
Small-scale	SNP	scf_000002_A_fumigatus_A1163	534817	534818	T->C	Y	AFUB_019260	533792	538288	smc4	Putative nuclear condensin complex subunit
Small-scale	SNP	scf_000002_A_fumigatus_A1163	535465	535466	G->A	Y	AFUB_019260	533792	538288	smc4	Putative nuclear condensin complex subunit
Small-scale	SNP	scf_000002_A_fumigatus_A1163	536968	536969	C->G	Y	AFUB_019260	533792	538288	smc4	Putative nuclear condensin complex subunit
Small-scale	SNP	scf_000002_A_fumigatus_A1163	537524	537525	C->G	Y	AFUB_019260	533792	538288	smc4	Putative nuclear condensin complex subunit
Small-scale	SNP	scf_000002_A_fumigatus_A1163	550886	550887	G->A	Y	AFUB_019290	549743	551103	NA	Ortholog of A. nidulans FGSC A4 : AN4600, A. niger CBS 513.88 : An07g06630, Aspergillus wentii : Aspwe1_0104597, Aspergillus sydowii : Aspsy1_0180963 and Aspergillus terreus NIH2624 : ATET_05692
Small-scale	SNP	scf_000002_A_fumigatus_A1163	552269	552270	G->A	Y	AFUB_019300	551532	556383	NA	Ortholog(s) have sterol 3-beta-glucosyltransferase activity, role in ascospore-type prospore membrane assembly, sterol metabolic process and cytoplasm localization
Small-scale	SNP	scf_000002_A_fumigatus_A1163	555005	555006	G->T	Y	AFUB_019300	551532	556383	NA	Ortholog(s) have sterol 3-beta-glucosyltransferase activity, role in ascospore-type prospore membrane assembly, sterol metabolic process and cytoplasm localization
Small-scale	SNP	scf_000002_A_fumigatus_A1163	567938	567939	T->C	Y	AFUB_019360	567469	568398	NA	Ortholog(s) have proton-transporting ATP synthase activity, rotational mechanism activity
Small-scale	SNP	scf_000002_A_fumigatus_A1163	588611	588612	C->T	Y	AFUB_019460	588450	589532	NA	Ortholog of A. nidulans FGSC A4 : AN7889, AN4657, A. fumigatus Af293 : Afu1g00920, Afu2g05115, Afu3g06425 and A. niger CBS 513.88 : An07g04250, An05g02120, An01g11840, An12g06960, An03g03340
Small-scale	SNP	scf_000002_A_fumigatus_A1163	592697	592698	G->A	Y	AFUB_019470	589958	592991	NA	Ortholog of A. nidulans FGSC A4 : AN4622, A. niger CBS 513.88 : An07g06420, A. oryzae RIB40 : AO090011000518, Aspergillus wentii : Aspwe1_0168908 and Aspergillus sydowii : Aspsy1_0155773
Small-scale	SNP	scf_000002_A_fumigatus_A1163	602830	602831	G->A	Y	AFUB_019510	600146	603704	NA	Ortholog(s) have role in ascospore formation, conidium formation, hyphal growth, regulation of meiosis I, regulation of mitotic nuclear division, syncytium formation by plasma membrane fusion, vacuole organization
Small-scale	SNP	scf_000002_A_fumigatus_A1163	603002	603003	C->T	Y	AFUB_019510	600146	603704	NA	Ortholog(s) have role in ascospore formation, conidium formation, hyphal growth, regulation of meiosis I, regulation of mitotic nuclear division, syncytium formation by plasma membrane fusion, vacuole organization
Small-scale	SNP	scf_000002_A_fumigatus_A1163	607786	607787	T->G	Y	AFUB_019530	607039	608389	NA	Ortholog of A. nidulans FGSC A4 : AN10575, A. niger CBS 513.88 : An07g06210, Aspergillus sydowii : Aspsy1_0091259 and Aspergillus terreus NIH2624 : ATET_06936
Small-scale	SNP	scf_000002_A_fumigatus_A1163	610686	610687	C->T	Y	AFUB_019540	608660	610736	NA	Ortholog of A. nidulans FGSC A4 : AN10572, A. niger CBS 513.88 : An07g06200, A. oryzae RIB40 : AO090026000558, Aspergillus wentii : Aspwe1_0353125 and Aspergillus sydowii : Aspsy1_0091260
Small-scale	SNP	scf_000002_A_fumigatus_A1163	615884	615885	G->A	Y	AFUB_019550	614015	616270	NA	Ortholog of A. nidulans FGSC A4 : AN4638, A. oryzae RIB40 : AO090026000574, Neosartorya fischeri NRRL 181 : NFIA_034840, Aspergillus wentii : Aspwe1_0352871 and Aspergillus versicolor : Aspve1_0731770
Small-scale	SNP	scf_000002_A_fumigatus_A1163	621438	621439	C->G	Y	AFUB_019560	620504	623133	NA	PA domain protein
Small-scale	SNP	scf_000002_A_fumigatus_A1163	621444	621445	G->C	Y	AFUB_019560	620504	623133	NA	PA domain protein
Small-scale	SNP	scf_000002_A_fumigatus_A1163	622553	622554	A->G	Y	AFUB_019560	620504	623133	NA	PA domain protein
Small-scale	SNP	scf_000002_A_fumigatus_A1163	624418	624419	G->A	Y	AFUB_019570	623649	624555	NA	Ortholog(s) have role in ascospore wall assembly and ascospore wall, lipid particle, prospore membrane localization
Small-scale	SNP	scf_000002_A_fumigatus_A1163	625760	625761	G->C	Y	AFUB_019580	625434	625993	NA	Ortholog of Aspergillus fumigatus A1163 : AFUB_019580
Small-scale	SNP	scf_000002_A_fumigatus_A1163	627346	627347	A->G	Y	AFUB_019590	627175	628145	NA	Ortholog of A. nidulans FGSC A4 : AN0401, Aspergillus flavus NRRL 3357 : AFL2T_08730, Aspergillus versicolor : Aspve1_0035846 and Aspergillus fumigatus A1163 : AFUB_019590
Small-scale	SNP	scf_000002_A_fumigatus_A1163	634094	634095	G->T	Y	AFUB_019610	629945	635035	NA	Ortholog(s) have role in positive regulation of conjugation with cellular fusion and TORC1 complex, cytoplasm localization
Small-scale	SNP	scf_000002_A_fumigatus_A1163	641244	641245	C->A	Y	AFUB_019620	637502	643553	NA	Ortholog(s) have role in apical protein localization, mitotic actomyosin contractile ring localization, regulation of cell shape and regulation of establishment of bipolar cell polarity regulating cell shape, more
Small-scale	SNP	scf_000002_A_fumigatus_A1163	646294	646295	C->T	Y	AFUB_019630	645324	646537	NA	Ortholog(s) have protein serine/threonine kinase activity, protein tyrosine kinase activity
Small-scale	SNP	scf_000002_A_fumigatus_A1163	651547	651548	C->T	Y	AFUB_019660	651239	654911	NA	Ortholog(s) have role in establishment or maintenance of cell polarity and cytosol localization
Small-scale	SNP	scf_000002_A_fumigatus_A1163	660422	660423	C->T	Y	AFUB_019690	658814	660715	dps1	Aspartyl-tRNA synthetase
Small-scale	SNP	scf_000002_A_fumigatus_A1163	662319	662320	T->C	Y	AFUB_019700	660846	662510	NA	Ortholog of A. nidulans FGSC A4 : AN11912, A. oryzae RIB40 : AO090026000604, Neosartorya fischeri NRRL 181 : NFIA_035000, Aspergillus clavatus NRRL 1 : ACLA_092190 and Aspergillus zonatus : Aspzo1_0087604
Small-scale	SNP	scf_000002_A_fumigatus_A1163	664793	664794	G->A	Y	AFUB_019720	664392	667059	akuB	Ku80 DNA helicase
Small-scale	SNP	scf_000002_A_fumigatus_A1163	669693	669694	G->A	Y	AFUB_019740	668721	670059	NA	Ortholog of Neosartorya fischeri NRRL 181 : NFIA_035040, Aspergillus fumigatus A1163 : AFUB_019740 and Aspergillus clavatus NRRL 1 : ACLA_092150
Small-scale	SNP	scf_000002_A_fumigatus_A1163	675228	675229	C->T	Y	AFUB_019760	674550	676963	NA	Ortholog(s) have role in maintenance of rDNA, mitotic DNA replication, mitotic sister chromatid segregation, postreplication repair and RecQ helicase-Topo III complex, mitochondrion, nucleus, site of double-strand break localization
Small-scale	SNP	scf_000002_A_fumigatus_A1163	682388	682389	C->T	Y	AFUB_019790	682071	686150	NA	Ortholog(s) have role in positive regulation of transcription from RNA polymerase II promoter involved in cellular response to chemical stimulus and cytosol, nucleus localization
Small-scale	SNP	scf_000002_A_fumigatus_A1163	689584	689585	T->G	Y	AFUB_019820	689200	690594	NA	Ortholog of Neosartorya fischeri NRRL 181 : NFIA_035120, Aspergillus wentii : Aspwe1_0168875, Aspergillus fumigatus A1163 : AFUB_019820 and Aspergillus clavatus NRRL 1 : ACLA_092070
Small-scale	SNP	scf_000002_A_fumigatus_A1163	692872	692873	A->G	Y	AFUB_019830	691195	695428	NA	Ortholog of A. nidulans FGSC A4 : AN4542, A. niger CBS 513.88 : An07g07060, A. oryzae RIB40 : AO090026000848, Aspergillus wentii : Aspwe1_0168873 and Aspergillus sydowii : Aspsy1_0091100
Small-scale	SNP	scf_000002_A_fumigatus_A1163	699909	699910	A->C	Y	AFUB_019860	699528	703346	dspD	Ortholog(s) have role in regulation of spore germination
Small-scale	SNP	scf_000002_A_fumigatus_A1163	713725	713726	A->G	Y	AFUB_019880	713401	714575	NA	Ortholog(s) have mRNA 3'-UTR AU-rich region binding activity, role in 3'-UTR-mediated mRNA stabilization, negative regulation of MAPK cascade and cytosol localization
Small-scale	SNP	scf_000002_A_fumigatus_A1163	723486	723487	T->C	Y	AFUB_019920	720904	723603	NA	Has domain(s) with predicted intracellular localization
Small-scale	SNP	scf_000002_A_fumigatus_A1163	726388	726389	T->A	Y	AFUB_019930	724798	729662	NA	Ortholog(s) have protein serine/threonine kinase activity, role in negative regulation of glycogen biosynthetic process, protein phosphorylation, regulation of (1->6)-beta-D-glucan biosynthetic process and cytosol, nucleus localization
Small-scale	SNP	scf_000002_A_fumigatus_A1163	726828	726829	A->G	Y	AFUB_019930	724798	729662	NA	Ortholog(s) have protein serine/threonine kinase activity, role in negative regulation of glycogen biosynthetic process, protein phosphorylation, regulation of (1->6)-beta-D-glucan biosynthetic process and cytosol, nucleus localization
Small-scale	SNP	scf_000002_A_fumigatus_A1163	735116	735117	G->C	Y	AFUB_019950	735044	736125	NA	Ortholog of A. nidulans FGSC A4 : AN4534, A. niger CBS 513.88 : An07g07250, A. oryzae RIB40 : AO090026000636, Aspergillus wentii : Aspwe1_0103173 and Aspergillus sydowii : Aspsy1_0059259
Small-scale	SNP	scf_000002_A_fumigatus_A1163	758095	758096	A->G	Y	AFUB_020050	758000	760214	NA	Has domain(s) with predicted DNA binding, chromatin binding activity
Small-scale	SNP	scf_000002_A_fumigatus_A1163	759202	759203	A->C	Y	AFUB_020050	758000	760214	NA	Has domain(s) with predicted DNA binding, chromatin binding activity
Small-scale	SNP	scf_000002_A_fumigatus_A1163	773197	773198	C->T	Y	AFUB_020090	769589	779445	prp8	Putative pre-mRNA splicing factor
Small-scale	SNP	scf_000002_A_fumigatus_A1163	777895	777896	G->A	Y	AFUB_020090	769589	779445	prp8	Putative pre-mRNA splicing factor
Small-scale	SNP	scf_000002_A_fumigatus_A1163	785925	785926	C->T	Y	AFUB_020110	784895	786802	NA	Has domain(s) with predicted sequence-specific DNA binding, transcription factor activity, sequence-specific DNA binding activity and role in regulation of transcription, DNA-templated
Small-scale	SNP	scf_000002_A_fumigatus_A1163	804139	804140	G->T	Y	AFUB_020160	803361	804463	NA	Ortholog of A. nidulans FGSC A4 : AN10569, A. niger CBS 513.88 : An07g07510, A. oryzae RIB40 : AO090120000281, Aspergillus wentii : Aspwe1_0040642 and Aspergillus terreus NIH2624 : ATET_09584
Small-scale	SNP	scf_000002_A_fumigatus_A1163	807549	807550	A->G	Y	AFUB_020180	807044	810069	utr2	Putative cell wall glucanase
Small-scale	SNP	scf_000002_A_fumigatus_A1163	831639	831640	C->T	Y	AFUB_020260	831315	832145	NA	Ortholog of A. nidulans FGSC A4 : AN11476, Neosartorya fischeri NRRL 181 : NFIA_035550, Aspergillus wentii : Aspwe1_0167491, Aspwe1_0172197 and Aspergillus versicolor : Aspve1_0086542, Aspve1_0089117
Small-scale	SNP	scf_000002_A_fumigatus_A1163	841853	841854	T->C	Y	AFUB_020310	841621	842268	NA	Ortholog of Aspergillus fumigatus A1163 : AFUB_020310
Small-scale	SNP	scf_000002_A_fumigatus_A1163	846738	846739	T->A	Y	AFUB_020330	845870	847097	NA	Ortholog(s) have cytosol, nucleus localization
Small-scale	SNP	scf_000002_A_fumigatus_A1163	849679	849680	G->A	Y	AFUB_020340	847360	849908	NA	Has domain(s) with predicted catalytic activity
Small-scale	SNP	scf_000002_A_fumigatus_A1163	855818	855819	G->A	Y	AFUB_020350	855312	857940	NA	protein of unknown function
Small-scale	SNP	scf_000002_A_fumigatus_A1163	857352	857353	C->T	Y	AFUB_020350	855312	857940	NA	protein of unknown function
Small-scale	SNP	scf_000002_A_fumigatus_A1163	857353	857354	C->T	Y	AFUB_020350	855312	857940	NA	protein of unknown function
Small-scale	SNP	scf_000002_A_fumigatus_A1163	859458	859459	A->G	Y	AFUB_020360	858753	862158	artA	14-3-3 family protein
Small-scale	SNP	scf_000002_A_fumigatus_A1163	860791	860792	C->A	Y	AFUB_020360	858753	862158	artA	14-3-3 family protein
Small-scale	SNP	scf_000002_A_fumigatus_A1163	860819	860820	G->T	Y	AFUB_020360	858753	862158	artA	14-3-3 family protein
Small-scale	SNP	scf_000002_A_fumigatus_A1163	861755	861756	C->T	Y	AFUB_020360	858753	862158	artA	14-3-3 family protein
Small-scale	SNP	scf_000002_A_fumigatus_A1163	871944	871945	T->C	Y	AFUB_020420	871795	875763	NA	Has domain(s) with predicted zinc ion binding activity
Small-scale	SNP	scf_000002_A_fumigatus_A1163	876493	876494	A->G	Y	AFUB_020430	876414	881626	NA	Ortholog(s) have role in budding cell apical bud growth, cell separation after cytokinesis and cellular bud neck localization
Small-scale	SNP	scf_000002_A_fumigatus_A1163	876499	876500	C->T	Y	AFUB_020430	876414	881626	NA	Ortholog(s) have role in budding cell apical bud growth, cell separation after cytokinesis and cellular bud neck localization
Small-scale	SNP	scf_000002_A_fumigatus_A1163	884897	884898	G->T	Y	AFUB_020450	884270	885005	NA	Ortholog(s) have cytosolic large ribosomal subunit, hyphal cell wall, mitochondrion, nucleus localization
Small-scale	SNP	scf_000002_A_fumigatus_A1163	886048	886049	G->T	Y	AFUB_020460	885995	888242	rpdA	Putative histone deacetylase
Small-scale	SNP	scf_000002_A_fumigatus_A1163	886049	886050	A->G	Y	AFUB_020460	885995	888242	rpdA	Putative histone deacetylase
Small-scale	SNP	scf_000002_A_fumigatus_A1163	886050	886051	A->G	Y	AFUB_020460	885995	888242	rpdA	Putative histone deacetylase
Small-scale	SNP	scf_000002_A_fumigatus_A1163	892888	892889	C->G	Y	AFUB_020490	891594	893704	NA	Ortholog(s) have mitochondrion targeting sequence binding, protein channel activity
Small-scale	SNP	scf_000002_A_fumigatus_A1163	897811	897812	G->T	Y	AFUB_020510	897794	900960	NA	Ortholog of A. nidulans FGSC A4 : AN4488, A. niger CBS 513.88 : An07g07910, A. oryzae RIB40 : AO090120000243, Aspergillus wentii : Aspwe1_0051514 and Aspergillus sydowii : Aspsy1_0163318
Small-scale	SNP	scf_000002_A_fumigatus_A1163	914252	914253	A->C	Y	AFUB_020560	913919	916231	NA	Putative calcium/calmodulin-dependent protein kinase
Small-scale	SNP	scf_000002_A_fumigatus_A1163	935136	935137	T->G	Y	AFUB_020640	933283	935385	NA	Ortholog of A. nidulans FGSC A4 : AN3032, A. fumigatus Af293 : Afu3g08990/cspA, A. niger CBS 513.88 : An16g02540, Aspergillus clavatus NRRL 1 : ACLA_036960 and Aspergillus sydowii : Aspsy1_0757763
Small-scale	SNP	scf_000002_A_fumigatus_A1163	935137	935138	A->T	Y	AFUB_020640	933283	935385	NA	Ortholog of A. nidulans FGSC A4 : AN3032, A. fumigatus Af293 : Afu3g08990/cspA, A. niger CBS 513.88 : An16g02540, Aspergillus clavatus NRRL 1 : ACLA_036960 and Aspergillus sydowii : Aspsy1_0757763
Small-scale	SNP	scf_000002_A_fumigatus_A1163	940084	940085	C->T	Y	AFUB_020650	936542	941533	tcsC	Group III two-component sensor kinase
Small-scale	SNP	scf_000002_A_fumigatus_A1163	968216	968217	C->A	Y	AFUB_020750	967235	968593	NA	Ortholog of A. nidulans FGSC A4 : AN3819, A. niger CBS 513.88 : An07g08240, Aspergillus wentii : Aspwe1_0051534, Aspergillus sydowii : Aspsy1_0088765 and Aspergillus terreus NIH2624 : ATET_09522
Small-scale	SNP	scf_000002_A_fumigatus_A1163	975342	975343	A->G	Y	AFUB_020770	975158	979520	hmg1	Hydroxymethylglutaryl-CoA (HMG-CoA) reductase
Small-scale	SNP	scf_000002_A_fumigatus_A1163	979021	979022	G->A	Y	AFUB_020770	975158	979520	hmg1	Hydroxymethylglutaryl-CoA (HMG-CoA) reductase
Small-scale	SNP	scf_000002_A_fumigatus_A1163	981127	981128	A->G	Y	AFUB_020780	980832	984857	NA	Ortholog(s) have role in establishment of cell polarity, hyphal growth and hyphal tip polarisome localization
Small-scale	SNP	scf_000002_A_fumigatus_A1163	981135	981136	C->T	Y	AFUB_020780	980832	984857	NA	Ortholog(s) have role in establishment of cell polarity, hyphal growth and hyphal tip polarisome localization
Small-scale	SNP	scf_000002_A_fumigatus_A1163	981762	981763	C->T	Y	AFUB_020780	980832	984857	NA	Ortholog(s) have role in establishment of cell polarity, hyphal growth and hyphal tip polarisome localization
Small-scale	SNP	scf_000002_A_fumigatus_A1163	984410	984411	C->A	Y	AFUB_020780	980832	984857	NA	Ortholog(s) have role in establishment of cell polarity, hyphal growth and hyphal tip polarisome localization
Small-scale	SNP	scf_000002_A_fumigatus_A1163	988706	988707	T->C	Y	AFUB_020810	988679	990078	NA	Ortholog(s) have role in U1 snRNA 3'-end processing, U4 snRNA 3'-end processing and U5 snRNA 3'-end processing, more
Small-scale	SNP	scf_000002_A_fumigatus_A1163	989161	989162	G->A	Y	AFUB_020810	988679	990078	NA	Ortholog(s) have role in U1 snRNA 3'-end processing, U4 snRNA 3'-end processing and U5 snRNA 3'-end processing, more
Small-scale	SNP	scf_000002_A_fumigatus_A1163	995494	995495	G->A	Y	AFUB_020840	995330	996086	NA	Ortholog(s) have nicotinamidase activity, role in chromatin silencing at rDNA, chromatin silencing at telomere, negative regulation of DNA amplification, replicative cell aging and cytosol, nucleus, peroxisome localization
Small-scale	SNP	scf_000002_A_fumigatus_A1163	1000103	1000104	G->A	Y	AFUB_020860	999218	1001100	NA	Ortholog(s) have lipid binding activity
Small-scale	SNP	scf_000002_A_fumigatus_A1163	1004705	1004706	G->A	Y	AFUB_020890	1003742	1005610	NA	Ortholog(s) have oxaloacetase activity and role in oxalate metabolic process, oxaloacetate metabolic process
Small-scale	SNP	scf_000002_A_fumigatus_A1163	1009208	1009209	T->C	Y	AFUB_020910	1009017	1010693	NA	Ortholog(s) have role in protein targeting to mitochondrion and cytosol, mitochondrial sorting and assembly machinery complex, nucleus localization
Small-scale	SNP	scf_000002_A_fumigatus_A1163	1009459	1009460	G->A	Y	AFUB_020910	1009017	1010693	NA	Ortholog(s) have role in protein targeting to mitochondrion and cytosol, mitochondrial sorting and assembly machinery complex, nucleus localization
Small-scale	SNP	scf_000002_A_fumigatus_A1163	1010684	1010685	A->C	Y	AFUB_020910	1009017	1010693	NA	Ortholog(s) have role in protein targeting to mitochondrion and cytosol, mitochondrial sorting and assembly machinery complex, nucleus localization
Small-scale	SNP	scf_000002_A_fumigatus_A1163	1017464	1017465	C->T	Y	AFUB_020920	1016856	1019668	NA	Ortholog of A. nidulans FGSC A4 : AN3802, A. niger CBS 513.88 : An07g08470, A. oryzae RIB40 : AO090005001512, Aspergillus wentii : Aspwe1_0051551 and Aspergillus sydowii : Aspsy1_0088749
Small-scale	SNP	scf_000002_A_fumigatus_A1163	1018424	1018425	A->T	Y	AFUB_020920	1016856	1019668	NA	Ortholog of A. nidulans FGSC A4 : AN3802, A. niger CBS 513.88 : An07g08470, A. oryzae RIB40 : AO090005001512, Aspergillus wentii : Aspwe1_0051551 and Aspergillus sydowii : Aspsy1_0088749
Small-scale	SNP	scf_000002_A_fumigatus_A1163	1018972	1018973	C->A	Y	AFUB_020920	1016856	1019668	NA	Ortholog of A. nidulans FGSC A4 : AN3802, A. niger CBS 513.88 : An07g08470, A. oryzae RIB40 : AO090005001512, Aspergillus wentii : Aspwe1_0051551 and Aspergillus sydowii : Aspsy1_0088749
Small-scale	SNP	scf_000002_A_fumigatus_A1163	1027806	1027807	G->A	Y	AFUB_020970	1027539	1028594	NA	Has domain(s) with predicted hydrolase activity, acting on carbon-nitrogen (but not peptide) bonds, in linear amides activity and role in metabolic process
Small-scale	SNP	scf_000002_A_fumigatus_A1163	1031906	1031907	G->T	Y	AFUB_020980	1028913	1032316	NA	Ortholog(s) have role in cellular response to UV, double-strand break repair via homologous recombination, postreplication repair and mitotic spindle pole body, nucleus localization
Small-scale	SNP	scf_000002_A_fumigatus_A1163	1038104	1038105	G->A	Y	AFUB_020990	1037241	1041709	cln1	Putaive G1/S-specific cyclin
Small-scale	SNP	scf_000002_A_fumigatus_A1163	1055893	1055894	C->T	Y	AFUB_021010	1055638	1056331	NA	Ortholog of Aspergillus fumigatus A1163 : AFUB_021010
Small-scale	SNP	scf_000002_A_fumigatus_A1163	1056259	1056260	G->A	Y	AFUB_021010	1055638	1056331	NA	Ortholog of Aspergillus fumigatus A1163 : AFUB_021010
Small-scale	SNP	scf_000002_A_fumigatus_A1163	1066657	1066658	T->A	Y	AFUB_021030	1065666	1067041	NA	Has domain(s) with predicted acid phosphatase activity, metal ion binding activity
Small-scale	SNP	scf_000002_A_fumigatus_A1163	1075917	1075918	A->T	Y	AFUB_021070	1075389	1078169	NA	Ortholog(s) have glycoprotein binding, metal ion binding, misfolded protein binding, peptide-N4-(N-acetyl-beta-glucosaminyl)asparagine amidase activity, structural constituent of cell wall activity
Small-scale	SNP	scf_000002_A_fumigatus_A1163	1076699	1076700	T->C	Y	AFUB_021070	1075389	1078169	NA	Ortholog(s) have glycoprotein binding, metal ion binding, misfolded protein binding, peptide-N4-(N-acetyl-beta-glucosaminyl)asparagine amidase activity, structural constituent of cell wall activity
Small-scale	SNP	scf_000002_A_fumigatus_A1163	1082007	1082008	G->C	Y	AFUB_021080	1081540	1084001	tpsB	Putative trehalose-6-phosphate synthase
Small-scale	SNP	scf_000002_A_fumigatus_A1163	1083221	1083222	G->A	Y	AFUB_021080	1081540	1084001	tpsB	Putative trehalose-6-phosphate synthase
Small-scale	SNP	scf_000002_A_fumigatus_A1163	1086478	1086479	C->T	Y	AFUB_021090	1084630	1088332	NA	Putative alpha, alpha-trehalose phosphate synthase subunit
Small-scale	SNP	scf_000002_A_fumigatus_A1163	1088762	1088763	C->A	Y	AFUB_021100	1088343	1091776	NA	Ortholog(s) have role in heterochromatin maintenance, homologous recombination-dependent replication fork processing, mitotic sister chromatid segregation, nucleosome assembly, regulation of phenotypic switching
Small-scale	SNP	scf_000002_A_fumigatus_A1163	1100730	1100731	C->G	Y	AFUB_021140	1098157	1102641	NA	Has domain(s) with predicted role in transmembrane transport and integral component of membrane localization
Small-scale	SNP	scf_000002_A_fumigatus_A1163	1102607	1102608	C->T	Y	AFUB_021140	1098157	1102641	NA	Has domain(s) with predicted role in transmembrane transport and integral component of membrane localization
Small-scale	SNP	scf_000002_A_fumigatus_A1163	1115615	1115616	A->G	Y	AFUB_021180	1114402	1117275	NA	Has domain(s) with predicted 1-phosphatidylinositol binding, clathrin binding, phospholipid binding activity, role in clathrin coat assembly and clathrin coat, clathrin-coated vesicle localization
Small-scale	SNP	scf_000002_A_fumigatus_A1163	1115797	1115798	G->T	Y	AFUB_021180	1114402	1117275	NA	Has domain(s) with predicted 1-phosphatidylinositol binding, clathrin binding, phospholipid binding activity, role in clathrin coat assembly and clathrin coat, clathrin-coated vesicle localization
Small-scale	SNP	scf_000002_A_fumigatus_A1163	1116472	1116473	A->C	Y	AFUB_021180	1114402	1117275	NA	Has domain(s) with predicted 1-phosphatidylinositol binding, clathrin binding, phospholipid binding activity, role in clathrin coat assembly and clathrin coat, clathrin-coated vesicle localization
Small-scale	SNP	scf_000002_A_fumigatus_A1163	1119578	1119579	C->G	Y	AFUB_021190	1118983	1120113	NA	Ortholog of Aspergillus flavus NRRL 3357 : AFL2T_01436, Neosartorya fischeri NRRL 181 : NFIA_080920, Aspergillus kawachii : Aspka1_0175713 and Aspergillus fumigatus A1163 : AFUB_021190
Small-scale	SNP	scf_000002_A_fumigatus_A1163	1123817	1123818	A->G	Y	AFUB_021210	1121713	1126714	NA	Ortholog of A. nidulans FGSC A4 : AN5221, A. oryzae RIB40 : AO090005001543, Aspergillus wentii : Aspwe1_0172392, Aspergillus sydowii : Aspsy1_0047769 and Aspergillus terreus NIH2624 : ATET_03670
Small-scale	SNP	scf_000002_A_fumigatus_A1163	1123818	1123819	A->G	Y	AFUB_021210	1121713	1126714	NA	Ortholog of A. nidulans FGSC A4 : AN5221, A. oryzae RIB40 : AO090005001543, Aspergillus wentii : Aspwe1_0172392, Aspergillus sydowii : Aspsy1_0047769 and Aspergillus terreus NIH2624 : ATET_03670
Small-scale	SNP	scf_000002_A_fumigatus_A1163	1130894	1130895	T->C	Y	AFUB_021230	1130782	1131425	NA	Ortholog of Aspergillus fumigatus A1163 : AFUB_021230
Small-scale	SNP	scf_000002_A_fumigatus_A1163	1144297	1144298	A->C	Y	AFUB_021240	1140633	1144607	NA	Ortholog(s) have cytosol localization
Small-scale	SNP	scf_000002_A_fumigatus_A1163	1151312	1151313	C->T	Y	AFUB_021260	1150804	1154174	NA	Has domain(s) with predicted nucleic acid binding, zinc ion binding activity
Small-scale	SNP	scf_000002_A_fumigatus_A1163	1153696	1153697	T->C	Y	AFUB_021260	1150804	1154174	NA	Has domain(s) with predicted nucleic acid binding, zinc ion binding activity
Small-scale	SNP	scf_000002_A_fumigatus_A1163	1162742	1162743	A->G	Y	AFUB_021290	1161355	1163213	hmgA	Homogentisate 1,2-dioxygenase involved in L-tyrosine degradation
Small-scale	SNP	scf_000002_A_fumigatus_A1163	1163115	1163116	C->T	Y	AFUB_021290	1161355	1163213	hmgA	Homogentisate 1,2-dioxygenase involved in L-tyrosine degradation
Small-scale	SNP	scf_000002_A_fumigatus_A1163	1165416	1165417	G->A	Y	AFUB_021310	1165011	1165706	maiA	maleylacetoacetate isomerase involved in L-tyrosine degradation
Small-scale	SNP	scf_000002_A_fumigatus_A1163	1165438	1165439	G->A	Y	AFUB_021310	1165011	1165706	maiA	maleylacetoacetate isomerase involved in L-tyrosine degradation
Small-scale	SNP	scf_000002_A_fumigatus_A1163	1165439	1165440	G->A	Y	AFUB_021310	1165011	1165706	maiA	maleylacetoacetate isomerase involved in L-tyrosine degradation
Small-scale	SNP	scf_000002_A_fumigatus_A1163	1166703	1166704	C->A	Y	AFUB_021320	1166623	1169605	NA	Ortholog of A. nidulans FGSC A4 : AN1893/silA, A. niger CBS 513.88 : An11g02150, Aspergillus wentii : Aspwe1_0055076 and Aspergillus sydowii : Aspsy1_0084209, Aspsy1_0138334
Small-scale	SNP	scf_000002_A_fumigatus_A1163	1170206	1170207	A->G	Y	AFUB_021330	1170110	1170730	NA	Ortholog(s) have protein channel activity, role in mitochondrial genome maintenance, protein import into mitochondrial matrix and mitochondrial inner membrane presequence translocase complex localization
Small-scale	SNP	scf_000002_A_fumigatus_A1163	1170480	1170481	A->G	Y	AFUB_021330	1170110	1170730	NA	Ortholog(s) have protein channel activity, role in mitochondrial genome maintenance, protein import into mitochondrial matrix and mitochondrial inner membrane presequence translocase complex localization
Small-scale	SNP	scf_000002_A_fumigatus_A1163	1170481	1170482	C->T	Y	AFUB_021330	1170110	1170730	NA	Ortholog(s) have protein channel activity, role in mitochondrial genome maintenance, protein import into mitochondrial matrix and mitochondrial inner membrane presequence translocase complex localization
Small-scale	SNP	scf_000002_A_fumigatus_A1163	1170484	1170485	C->T	Y	AFUB_021330	1170110	1170730	NA	Ortholog(s) have protein channel activity, role in mitochondrial genome maintenance, protein import into mitochondrial matrix and mitochondrial inner membrane presequence translocase complex localization
Small-scale	SNP	scf_000002_A_fumigatus_A1163	1171700	1171701	T->C	Y	AFUB_021340	1171487	1172872	NA	Has domain(s) with predicted hydrolase activity
Small-scale	SNP	scf_000002_A_fumigatus_A1163	1171851	1171852	A->G	Y	AFUB_021340	1171487	1172872	NA	Has domain(s) with predicted hydrolase activity
Small-scale	SNP	scf_000002_A_fumigatus_A1163	1173546	1173547	A->T	Y	AFUB_021350	1172975	1174718	NA	Ortholog(s) have role in steroid metabolic process
Small-scale	SNP	scf_000002_A_fumigatus_A1163	1180216	1180217	G->A	Y	AFUB_021380	1178966	1181025	NA	Ortholog(s) have role in cell redox homeostasis
Small-scale	SNP	scf_000002_A_fumigatus_A1163	1180306	1180307	A->G	Y	AFUB_021380	1178966	1181025	NA	Ortholog(s) have role in cell redox homeostasis
Small-scale	SNP	scf_000002_A_fumigatus_A1163	1180662	1180663	C->G	Y	AFUB_021380	1178966	1181025	NA	Ortholog(s) have role in cell redox homeostasis
Small-scale	SNP	scf_000002_A_fumigatus_A1163	1180794	1180795	A->G	Y	AFUB_021380	1178966	1181025	NA	Ortholog(s) have role in cell redox homeostasis
Small-scale	SNP	scf_000002_A_fumigatus_A1163	1181491	1181492	C->T	Y	AFUB_021390	1181174	1182786	NA	Has domain(s) with predicted FAD binding, oxidoreductase activity and role in metabolic process
Small-scale	SNP	scf_000002_A_fumigatus_A1163	1184111	1184112	A->T	Y	AFUB_021400	1183434	1186639	NA	Ortholog of A. nidulans FGSC A4 : AN1880, A. niger CBS 513.88 : An11g03040, A. oryzae RIB40 : AO090003000221, Aspergillus wentii : Aspwe1_0098739 and Aspergillus sydowii : Aspsy1_0126133
Small-scale	SNP	scf_000002_A_fumigatus_A1163	1185537	1185538	C->T	Y	AFUB_021400	1183434	1186639	NA	Ortholog of A. nidulans FGSC A4 : AN1880, A. niger CBS 513.88 : An11g03040, A. oryzae RIB40 : AO090003000221, Aspergillus wentii : Aspwe1_0098739 and Aspergillus sydowii : Aspsy1_0126133
Small-scale	SNP	scf_000002_A_fumigatus_A1163	1185891	1185892	T->C	Y	AFUB_021400	1183434	1186639	NA	Ortholog of A. nidulans FGSC A4 : AN1880, A. niger CBS 513.88 : An11g03040, A. oryzae RIB40 : AO090003000221, Aspergillus wentii : Aspwe1_0098739 and Aspergillus sydowii : Aspsy1_0126133
Small-scale	SNP	scf_000002_A_fumigatus_A1163	1188391	1188392	T->G	Y	AFUB_021410	1187261	1192095	NA	WD repeat protein
Small-scale	SNP	scf_000002_A_fumigatus_A1163	1194739	1194740	T->C	Y	AFUB_021430	1194113	1197217	NA	Ortholog of A. nidulans FGSC A4 : AN10247, A. oryzae RIB40 : AO090003000225, Aspergillus wentii : Aspwe1_0046123 and Aspergillus terreus NIH2624 : ATET_06072
Small-scale	SNP	scf_000002_A_fumigatus_A1163	1199296	1199297	A->T	Y	AFUB_021440	1197925	1201243	NA	Ortholog of A. nidulans FGSC A4 : AN10235, A. niger CBS 513.88 : An11g03330, A. oryzae RIB40 : AO090003001565, Aspergillus wentii : Aspwe1_0120274 and Aspergillus terreus NIH2624 : ATET_06071
Small-scale	SNP	scf_000002_A_fumigatus_A1163	1203877	1203878	C->T	Y	AFUB_021450	1202560	1205448	NA	Ortholog of A. nidulans FGSC A4 : AN5126, A. fumigatus Af293 : Afu1g07490, A. niger CBS 513.88 : An11g03310, An07g10050, A. oryzae RIB40 : AO090012000999 and Aspergillus wentii : Aspwe1_0046371
Small-scale	SNP	scf_000002_A_fumigatus_A1163	1206993	1206994	G->A	Y	AFUB_021460	1206687	1209086	NA	Ortholog(s) have role in cellular manganese ion homeostasis, mitochondrion organization and fungal-type vacuole membrane localization
Small-scale	SNP	scf_000002_A_fumigatus_A1163	1213430	1213431	T->C	Y	AFUB_021480	1211504	1216108	NA	Has domain(s) with predicted ubiquitin-protein transferase activity, role in cellular protein modification process and intracellular localization
Small-scale	SNP	scf_000002_A_fumigatus_A1163	1213440	1213441	A->G	Y	AFUB_021480	1211504	1216108	NA	Has domain(s) with predicted ubiquitin-protein transferase activity, role in cellular protein modification process and intracellular localization
Small-scale	SNP	scf_000002_A_fumigatus_A1163	1214200	1214201	G->A	Y	AFUB_021480	1211504	1216108	NA	Has domain(s) with predicted ubiquitin-protein transferase activity, role in cellular protein modification process and intracellular localization
Small-scale	SNP	scf_000002_A_fumigatus_A1163	1220644	1220645	T->C	Y	AFUB_021500	1219728	1221505	NA	Ortholog of A. nidulans FGSC A4 : AN1871, A. niger CBS 513.88 : An11g03160, A. oryzae RIB40 : AO090003000240, Aspergillus wentii : Aspwe1_0177180 and Aspergillus sydowii : Aspsy1_0140729
Small-scale	SNP	scf_000002_A_fumigatus_A1163	1220803	1220804	A->G	Y	AFUB_021500	1219728	1221505	NA	Ortholog of A. nidulans FGSC A4 : AN1871, A. niger CBS 513.88 : An11g03160, A. oryzae RIB40 : AO090003000240, Aspergillus wentii : Aspwe1_0177180 and Aspergillus sydowii : Aspsy1_0140729
Small-scale	SNP	scf_000002_A_fumigatus_A1163	1221466	1221467	G->C	Y	AFUB_021500	1219728	1221505	NA	Ortholog of A. nidulans FGSC A4 : AN1871, A. niger CBS 513.88 : An11g03160, A. oryzae RIB40 : AO090003000240, Aspergillus wentii : Aspwe1_0177180 and Aspergillus sydowii : Aspsy1_0140729
Small-scale	SNP	scf_000002_A_fumigatus_A1163	1227629	1227630	A->G	Y	AFUB_021540	1226560	1228182	NA	Has domain(s) with predicted RNA polymerase II transcription factor activity, sequence-specific DNA binding, zinc ion binding activity, role in regulation of transcription, DNA-templated and nucleus localization
Small-scale	SNP	scf_000002_A_fumigatus_A1163	1227744	1227745	G->A	Y	AFUB_021540	1226560	1228182	NA	Has domain(s) with predicted RNA polymerase II transcription factor activity, sequence-specific DNA binding, zinc ion binding activity, role in regulation of transcription, DNA-templated and nucleus localization
Small-scale	SNP	scf_000002_A_fumigatus_A1163	1229612	1229613	C->G	Y	AFUB_021550	1228280	1229812	NA	Has domain(s) with predicted metal ion binding, oxidoreductase activity and role in oxidation-reduction process
Small-scale	SNP	scf_000002_A_fumigatus_A1163	1239814	1239815	T->C	Y	AFUB_021610	1238698	1240336	NA	Has domain(s) with predicted oxidoreductase activity and role in metabolic process
Small-scale	SNP	scf_000002_A_fumigatus_A1163	1241124	1241125	C->T	Y	AFUB_021620	1240563	1241811	NA	Ortholog of A. nidulans FGSC A4 : AN2060/abxA, A. fumigatus Af293 : Afu6g12120, A. oryzae RIB40 : AO090003001017 and Neosartorya fischeri NRRL 181 : NFIA_058060, NFIA_081320
Small-scale	SNP	scf_000002_A_fumigatus_A1163	1243272	1243273	T->C	Y	AFUB_021640	1242972	1244205	NA	Has domain(s) with predicted oxidoreductase activity, transferase activity, transferring acyl groups other than amino-acyl groups, zinc ion binding activity and role in oxidation-reduction process
Small-scale	SNP	scf_000002_A_fumigatus_A1163	1244607	1244608	G->A	Y	AFUB_021650	1244257	1245911	NA	Putative regulator of sugar utilization
Small-scale	SNP	scf_000002_A_fumigatus_A1163	1245687	1245688	A->C	Y	AFUB_021650	1244257	1245911	NA	Putative regulator of sugar utilization
Small-scale	SNP	scf_000002_A_fumigatus_A1163	1249404	1249405	G->A	Y	AFUB_021670	1247288	1249821	bipA	Hsp70 chaperone
Small-scale	SNP	scf_000002_A_fumigatus_A1163	1276720	1276721	T->C	Y	AFUB_021740	1276599	1277717	NA	Has domain(s) with predicted heme binding activity
Small-scale	SNP	scf_000002_A_fumigatus_A1163	1285575	1285576	C->T	Y	AFUB_021760	1283623	1286361	NA	Ortholog(s) have ubiquitin binding activity and role in ascospore-type prospore assembly, endocytosis, protein targeting to vacuole involved in ubiquitin-dependent protein catabolic process via the multivesicular body sorting pathway
Small-scale	SNP	scf_000002_A_fumigatus_A1163	1285638	1285639	G->C	Y	AFUB_021760	1283623	1286361	NA	Ortholog(s) have ubiquitin binding activity and role in ascospore-type prospore assembly, endocytosis, protein targeting to vacuole involved in ubiquitin-dependent protein catabolic process via the multivesicular body sorting pathway
Small-scale	SNP	scf_000002_A_fumigatus_A1163	1290729	1290730	C->A	Y	AFUB_021800	1290410	1296106	NA	Ortholog(s) have Cul3-RING ubiquitin ligase complex localization
Small-scale	SNP	scf_000002_A_fumigatus_A1163	1291805	1291806	A->G	Y	AFUB_021800	1290410	1296106	NA	Ortholog(s) have Cul3-RING ubiquitin ligase complex localization
Small-scale	SNP	scf_000002_A_fumigatus_A1163	1295886	1295887	A->G	Y	AFUB_021800	1290410	1296106	NA	Ortholog(s) have Cul3-RING ubiquitin ligase complex localization
Small-scale	SNP	scf_000002_A_fumigatus_A1163	1296019	1296020	T->G	Y	AFUB_021800	1290410	1296106	NA	Ortholog(s) have Cul3-RING ubiquitin ligase complex localization
Small-scale	SNP	scf_000002_A_fumigatus_A1163	1299113	1299114	A->G	Y	AFUB_021810	1298837	1301994	NA	Ortholog(s) have role in autophagy, protein secretion
Small-scale	SNP	scf_000002_A_fumigatus_A1163	1300047	1300048	G->A	Y	AFUB_021810	1298837	1301994	NA	Ortholog(s) have role in autophagy, protein secretion
Small-scale	SNP	scf_000002_A_fumigatus_A1163	1300102	1300103	A->G	Y	AFUB_021810	1298837	1301994	NA	Ortholog(s) have role in autophagy, protein secretion
Small-scale	SNP	scf_000002_A_fumigatus_A1163	1300338	1300339	C->T	Y	AFUB_021810	1298837	1301994	NA	Ortholog(s) have role in autophagy, protein secretion
Small-scale	SNP	scf_000002_A_fumigatus_A1163	1300359	1300360	G->A	Y	AFUB_021810	1298837	1301994	NA	Ortholog(s) have role in autophagy, protein secretion
Small-scale	SNP	scf_000002_A_fumigatus_A1163	1300484	1300485	A->C	Y	AFUB_021810	1298837	1301994	NA	Ortholog(s) have role in autophagy, protein secretion
Small-scale	SNP	scf_000002_A_fumigatus_A1163	1301562	1301563	A->C	Y	AFUB_021810	1298837	1301994	NA	Ortholog(s) have role in autophagy, protein secretion
Small-scale	SNP	scf_000002_A_fumigatus_A1163	1304924	1304925	A->G	Y	AFUB_021820	1303136	1305369	NA	Ortholog(s) have cytosol, nucleus localization
Small-scale	SNP	scf_000002_A_fumigatus_A1163	1305698	1305699	G->A	Y	AFUB_021830	1305580	1310912	NA	Has domain(s) with predicted RNA polymerase II transcription cofactor activity, role in regulation of transcription from RNA polymerase II promoter and mediator complex localization
Small-scale	SNP	scf_000002_A_fumigatus_A1163	1305719	1305720	A->C	Y	AFUB_021830	1305580	1310912	NA	Has domain(s) with predicted RNA polymerase II transcription cofactor activity, role in regulation of transcription from RNA polymerase II promoter and mediator complex localization
Small-scale	SNP	scf_000002_A_fumigatus_A1163	1307105	1307106	G->A	Y	AFUB_021830	1305580	1310912	NA	Has domain(s) with predicted RNA polymerase II transcription cofactor activity, role in regulation of transcription from RNA polymerase II promoter and mediator complex localization
Small-scale	SNP	scf_000002_A_fumigatus_A1163	1307293	1307294	T->C	Y	AFUB_021830	1305580	1310912	NA	Has domain(s) with predicted RNA polymerase II transcription cofactor activity, role in regulation of transcription from RNA polymerase II promoter and mediator complex localization
Small-scale	SNP	scf_000002_A_fumigatus_A1163	1307551	1307552	C->T	Y	AFUB_021830	1305580	1310912	NA	Has domain(s) with predicted RNA polymerase II transcription cofactor activity, role in regulation of transcription from RNA polymerase II promoter and mediator complex localization
Small-scale	SNP	scf_000002_A_fumigatus_A1163	1309489	1309490	A->G	Y	AFUB_021830	1305580	1310912	NA	Has domain(s) with predicted RNA polymerase II transcription cofactor activity, role in regulation of transcription from RNA polymerase II promoter and mediator complex localization
Small-scale	SNP	scf_000002_A_fumigatus_A1163	1313621	1313622	C->A	Y	AFUB_021850	1312622	1314930	NA	Putative translation release factor eRF3
Small-scale	SNP	scf_000002_A_fumigatus_A1163	1313637	1313638	T->C	Y	AFUB_021850	1312622	1314930	NA	Putative translation release factor eRF3
Small-scale	SNP	scf_000002_A_fumigatus_A1163	1314861	1314862	T->G	Y	AFUB_021850	1312622	1314930	NA	Putative translation release factor eRF3
Small-scale	SNP	scf_000002_A_fumigatus_A1163	1315713	1315714	A->G	Y	AFUB_021860	1315335	1317808	NA	Ortholog(s) have GTPase regulator activity and cytosol, nucleus localization
Small-scale	SNP	scf_000002_A_fumigatus_A1163	1315941	1315942	A->T	Y	AFUB_021860	1315335	1317808	NA	Ortholog(s) have GTPase regulator activity and cytosol, nucleus localization
Small-scale	SNP	scf_000002_A_fumigatus_A1163	1315956	1315957	G->A	Y	AFUB_021860	1315335	1317808	NA	Ortholog(s) have GTPase regulator activity and cytosol, nucleus localization
Small-scale	SNP	scf_000002_A_fumigatus_A1163	1316040	1316041	G->A	Y	AFUB_021860	1315335	1317808	NA	Ortholog(s) have GTPase regulator activity and cytosol, nucleus localization
Small-scale	SNP	scf_000002_A_fumigatus_A1163	1317712	1317713	T->A	Y	AFUB_021860	1315335	1317808	NA	Ortholog(s) have GTPase regulator activity and cytosol, nucleus localization
Small-scale	SNP	scf_000002_A_fumigatus_A1163	1320861	1320862	C->T	Y	AFUB_021880	1319511	1321646	NA	Ortholog of A. nidulans FGSC A4 : AN2083, A. niger CBS 513.88 : An11g04540, A. oryzae RIB40 : AO090003000288, Aspergillus wentii : Aspwe1_0046199 and Aspergillus sydowii : Aspsy1_0039236
Small-scale	SNP	scf_000002_A_fumigatus_A1163	1320938	1320939	A->G	Y	AFUB_021880	1319511	1321646	NA	Ortholog of A. nidulans FGSC A4 : AN2083, A. niger CBS 513.88 : An11g04540, A. oryzae RIB40 : AO090003000288, Aspergillus wentii : Aspwe1_0046199 and Aspergillus sydowii : Aspsy1_0039236
Small-scale	SNP	scf_000002_A_fumigatus_A1163	1321147	1321148	G->A	Y	AFUB_021880	1319511	1321646	NA	Ortholog of A. nidulans FGSC A4 : AN2083, A. niger CBS 513.88 : An11g04540, A. oryzae RIB40 : AO090003000288, Aspergillus wentii : Aspwe1_0046199 and Aspergillus sydowii : Aspsy1_0039236
Small-scale	SNP	scf_000002_A_fumigatus_A1163	1321724	1321725	T->A	Y	AFUB_021890	1321699	1324819	NA	Ortholog(s) have role in mismatch repair, nucleotide-excision repair and mitotic spindle, nucleus localization
Small-scale	SNP	scf_000002_A_fumigatus_A1163	1323508	1323509	A->G	Y	AFUB_021890	1321699	1324819	NA	Ortholog(s) have role in mismatch repair, nucleotide-excision repair and mitotic spindle, nucleus localization
Small-scale	SNP	scf_000002_A_fumigatus_A1163	1326332	1326333	G->A	Y	AFUB_021900	1325723	1327095	NA	Has domain(s) with predicted oxidoreductase activity, acting on the aldehyde or oxo group of donors, disulfide as acceptor activity and role in metabolic process
Small-scale	SNP	scf_000002_A_fumigatus_A1163	1327463	1327464	T->C	Y	AFUB_021910	1327360	1327883	NA	Ortholog of A. nidulans FGSC A4 : AN10243, A. fumigatus Af293 : Afu4g09900, A. oryzae RIB40 : AO090003001243, Aspergillus wentii : Aspwe1_0072976, Aspwe1_0166814 and Aspergillus sydowii : Aspsy1_0141212
Small-scale	SNP	scf_000002_A_fumigatus_A1163	1327612	1327613	A->G	Y	AFUB_021910	1327360	1327883	NA	Ortholog of A. nidulans FGSC A4 : AN10243, A. fumigatus Af293 : Afu4g09900, A. oryzae RIB40 : AO090003001243, Aspergillus wentii : Aspwe1_0072976, Aspwe1_0166814 and Aspergillus sydowii : Aspsy1_0141212
Small-scale	SNP	scf_000002_A_fumigatus_A1163	1333403	1333404	A->C	Y	AFUB_021920	1333393	1335359	NA	Ortholog of A. niger CBS 513.88 : An11g04600, A. oryzae RIB40 : AO090003000293, Neosartorya fischeri NRRL 181 : NFIA_081620 and Aspergillus clavatus NRRL 1 : ACLA_089760
Small-scale	SNP	scf_000002_A_fumigatus_A1163	1337305	1337306	T->C	Y	AFUB_021930	1335843	1338166	NA	Ortholog of A. niger CBS 513.88 : An11g04610, A. oryzae RIB40 : AO090003000294, Neosartorya fischeri NRRL 181 : NFIA_081630 and Aspergillus clavatus NRRL 1 : ACLA_089750
Small-scale	SNP	scf_000002_A_fumigatus_A1163	1337479	1337480	A->G	Y	AFUB_021930	1335843	1338166	NA	Ortholog of A. niger CBS 513.88 : An11g04610, A. oryzae RIB40 : AO090003000294, Neosartorya fischeri NRRL 181 : NFIA_081630 and Aspergillus clavatus NRRL 1 : ACLA_089750
Small-scale	SNP	scf_000002_A_fumigatus_A1163	1339819	1339820	C->T	Y	AFUB_021950	1339792	1344843	NA	Ortholog(s) have nuclear periphery localization
Small-scale	SNP	scf_000002_A_fumigatus_A1163	1341753	1341754	G->A	Y	AFUB_021950	1339792	1344843	NA	Ortholog(s) have nuclear periphery localization
Small-scale	SNP	scf_000002_A_fumigatus_A1163	1342015	1342016	G->T	Y	AFUB_021950	1339792	1344843	NA	Ortholog(s) have nuclear periphery localization
Small-scale	SNP	scf_000002_A_fumigatus_A1163	1342134	1342135	A->C	Y	AFUB_021950	1339792	1344843	NA	Ortholog(s) have nuclear periphery localization
Small-scale	SNP	scf_000002_A_fumigatus_A1163	1342302	1342303	T->C	Y	AFUB_021950	1339792	1344843	NA	Ortholog(s) have nuclear periphery localization
Small-scale	SNP	scf_000002_A_fumigatus_A1163	1343435	1343436	A->G	Y	AFUB_021950	1339792	1344843	NA	Ortholog(s) have nuclear periphery localization
Small-scale	SNP	scf_000002_A_fumigatus_A1163	1345250	1345251	G->A	Y	AFUB_021960	1345143	1345915	NA	Protein of unknown function identified by mass spectrometry
Small-scale	SNP	scf_000002_A_fumigatus_A1163	1345360	1345361	A->G	Y	AFUB_021960	1345143	1345915	NA	Protein of unknown function identified by mass spectrometry
Small-scale	SNP	scf_000002_A_fumigatus_A1163	1346321	1346322	A->G	Y	AFUB_021970	1346249	1347696	NA	Ortholog(s) have mRNA binding activity, role in telomere maintenance and cytoplasm, nucleus localization
Small-scale	SNP	scf_000002_A_fumigatus_A1163	1346450	1346451	C->T	Y	AFUB_021970	1346249	1347696	NA	Ortholog(s) have mRNA binding activity, role in telomere maintenance and cytoplasm, nucleus localization
Small-scale	SNP	scf_000002_A_fumigatus_A1163	1346966	1346967	G->A	Y	AFUB_021970	1346249	1347696	NA	Ortholog(s) have mRNA binding activity, role in telomere maintenance and cytoplasm, nucleus localization
Small-scale	SNP	scf_000002_A_fumigatus_A1163	1347491	1347492	A->G	Y	AFUB_021970	1346249	1347696	NA	Ortholog(s) have mRNA binding activity, role in telomere maintenance and cytoplasm, nucleus localization
Small-scale	SNP	scf_000002_A_fumigatus_A1163	1349080	1349081	A->T	Y	AFUB_021980	1348664	1349806	NA	Ortholog of A. nidulans FGSC A4 : AN2088, A. niger CBS 513.88 : An11g04660, A. oryzae RIB40 : AO090003000298, Aspergillus wentii : Aspwe1_0177253 and Aspergillus sydowii : Aspsy1_0054006
Small-scale	SNP	scf_000002_A_fumigatus_A1163	1349110	1349111	C->T	Y	AFUB_021980	1348664	1349806	NA	Ortholog of A. nidulans FGSC A4 : AN2088, A. niger CBS 513.88 : An11g04660, A. oryzae RIB40 : AO090003000298, Aspergillus wentii : Aspwe1_0177253 and Aspergillus sydowii : Aspsy1_0054006
Small-scale	SNP	scf_000002_A_fumigatus_A1163	1349111	1349112	G->A	Y	AFUB_021980	1348664	1349806	NA	Ortholog of A. nidulans FGSC A4 : AN2088, A. niger CBS 513.88 : An11g04660, A. oryzae RIB40 : AO090003000298, Aspergillus wentii : Aspwe1_0177253 and Aspergillus sydowii : Aspsy1_0054006
Small-scale	SNP	scf_000002_A_fumigatus_A1163	1349128	1349129	C->G	Y	AFUB_021980	1348664	1349806	NA	Ortholog of A. nidulans FGSC A4 : AN2088, A. niger CBS 513.88 : An11g04660, A. oryzae RIB40 : AO090003000298, Aspergillus wentii : Aspwe1_0177253 and Aspergillus sydowii : Aspsy1_0054006
Small-scale	SNP	scf_000002_A_fumigatus_A1163	1350446	1350447	A->G	Y	AFUB_021990	1350120	1354973	NA	Ortholog(s) have role in double-strand break repair, postreplication repair, production of siRNA involved in RNA interference
Small-scale	SNP	scf_000002_A_fumigatus_A1163	1350447	1350448	A->G	Y	AFUB_021990	1350120	1354973	NA	Ortholog(s) have role in double-strand break repair, postreplication repair, production of siRNA involved in RNA interference
Small-scale	SNP	scf_000002_A_fumigatus_A1163	1350504	1350505	G->A	Y	AFUB_021990	1350120	1354973	NA	Ortholog(s) have role in double-strand break repair, postreplication repair, production of siRNA involved in RNA interference
Small-scale	SNP	scf_000002_A_fumigatus_A1163	1352857	1352858	T->C	Y	AFUB_021990	1350120	1354973	NA	Ortholog(s) have role in double-strand break repair, postreplication repair, production of siRNA involved in RNA interference
Small-scale	SNP	scf_000002_A_fumigatus_A1163	1353039	1353040	T->C	Y	AFUB_021990	1350120	1354973	NA	Ortholog(s) have role in double-strand break repair, postreplication repair, production of siRNA involved in RNA interference
Small-scale	SNP	scf_000002_A_fumigatus_A1163	1353343	1353344	G->A	Y	AFUB_021990	1350120	1354973	NA	Ortholog(s) have role in double-strand break repair, postreplication repair, production of siRNA involved in RNA interference
Small-scale	SNP	scf_000002_A_fumigatus_A1163	1353564	1353565	A->G	Y	AFUB_021990	1350120	1354973	NA	Ortholog(s) have role in double-strand break repair, postreplication repair, production of siRNA involved in RNA interference
Small-scale	SNP	scf_000002_A_fumigatus_A1163	1355970	1355971	C->G	Y	AFUB_022000	1355747	1357884	NA	Ortholog(s) have cytoplasm localization
Small-scale	SNP	scf_000002_A_fumigatus_A1163	1355984	1355985	C->A	Y	AFUB_022000	1355747	1357884	NA	Ortholog(s) have cytoplasm localization
Small-scale	SNP	scf_000002_A_fumigatus_A1163	1356014	1356015	T->C	Y	AFUB_022000	1355747	1357884	NA	Ortholog(s) have cytoplasm localization
Small-scale	SNP	scf_000002_A_fumigatus_A1163	1356046	1356047	G->T	Y	AFUB_022000	1355747	1357884	NA	Ortholog(s) have cytoplasm localization
Small-scale	SNP	scf_000002_A_fumigatus_A1163	1356410	1356411	G->A	Y	AFUB_022000	1355747	1357884	NA	Ortholog(s) have cytoplasm localization
Small-scale	SNP	scf_000002_A_fumigatus_A1163	1356514	1356515	T->C	Y	AFUB_022000	1355747	1357884	NA	Ortholog(s) have cytoplasm localization
Small-scale	SNP	scf_000002_A_fumigatus_A1163	1356669	1356670	G->C	Y	AFUB_022000	1355747	1357884	NA	Ortholog(s) have cytoplasm localization
Small-scale	SNP	scf_000002_A_fumigatus_A1163	1357596	1357597	C->T	Y	AFUB_022000	1355747	1357884	NA	Ortholog(s) have cytoplasm localization
Small-scale	SNP	scf_000002_A_fumigatus_A1163	1357683	1357684	A->C	Y	AFUB_022000	1355747	1357884	NA	Ortholog(s) have cytoplasm localization
Small-scale	SNP	scf_000002_A_fumigatus_A1163	1358679	1358680	A->G	Y	AFUB_022010	1358169	1359689	NA	Putative tyrosine decarboxylase
Small-scale	SNP	scf_000002_A_fumigatus_A1163	1360171	1360172	C->A	Y	AFUB_022020	1360077	1361893	NA	Ortholog(s) have aminopeptidase activity, role in proteolysis involved in cellular protein catabolic process and extracellular region localization
Small-scale	SNP	scf_000002_A_fumigatus_A1163	1360188	1360189	G->A	Y	AFUB_022020	1360077	1361893	NA	Ortholog(s) have aminopeptidase activity, role in proteolysis involved in cellular protein catabolic process and extracellular region localization
Small-scale	SNP	scf_000002_A_fumigatus_A1163	1364364	1364365	C->T	Y	AFUB_022030	1362108	1364420	NA	Ortholog(s) have Rab guanyl-nucleotide exchange factor activity, phosphatidylinositol-3-phosphate binding, phosphatidylinositol-5-phosphate binding, phosphatidylserine binding activity
Small-scale	SNP	scf_000002_A_fumigatus_A1163	1364371	1364372	A->G	Y	AFUB_022030	1362108	1364420	NA	Ortholog(s) have Rab guanyl-nucleotide exchange factor activity, phosphatidylinositol-3-phosphate binding, phosphatidylinositol-5-phosphate binding, phosphatidylserine binding activity
Small-scale	SNP	scf_000002_A_fumigatus_A1163	1367071	1367072	C->T	Y	AFUB_022040	1364482	1370784	NA	Ortholog(s) have role in Golgi to endosome transport, cell morphogenesis, cleistothecium development, conidium formation and endoplasmic reticulum organization, more
Small-scale	SNP	scf_000002_A_fumigatus_A1163	1370067	1370068	A->C	Y	AFUB_022040	1364482	1370784	NA	Ortholog(s) have role in Golgi to endosome transport, cell morphogenesis, cleistothecium development, conidium formation and endoplasmic reticulum organization, more
Small-scale	SNP	scf_000002_A_fumigatus_A1163	1376264	1376265	T->C	Y	AFUB_022080	1375710	1376924	NA	Ortholog of Aspergillus fumigatus A1163 : AFUB_022080
Small-scale	SNP	scf_000002_A_fumigatus_A1163	1376828	1376829	A->G	Y	AFUB_022080	1375710	1376924	NA	Ortholog of Aspergillus fumigatus A1163 : AFUB_022080
Small-scale	SNP	scf_000002_A_fumigatus_A1163	1378741	1378742	T->C	Y	AFUB_022090	1378107	1379284	aox	Alternative oxidase, mediates the cyanide-insensitive respiratory pathway
Small-scale	SNP	scf_000002_A_fumigatus_A1163	1381734	1381735	T->C	Y	AFUB_022100	1380218	1382146	NA	Ortholog of A. nidulans FGSC A4 : AN2100, A. niger CBS 513.88 : An11g04820, Aspergillus wentii : Aspwe1_0120231, Aspergillus sydowii : Aspsy1_0054017 and Aspergillus terreus NIH2624 : ATET_05993
Small-scale	SNP	scf_000002_A_fumigatus_A1163	1386657	1386658	A->C	Y	AFUB_022110	1386451	1387351	NA	Ortholog(s) have azetidine-2-carboxylic acid acetyltransferase activity and cytosol, nucleus localization
Small-scale	SNP	scf_000002_A_fumigatus_A1163	1394223	1394224	A->G	Y	AFUB_022160	1394024	1397700	NA	Has domain(s) with predicted GTP binding, GTPase activity
Small-scale	SNP	scf_000002_A_fumigatus_A1163	1396299	1396300	T->C	Y	AFUB_022160	1394024	1397700	NA	Has domain(s) with predicted GTP binding, GTPase activity
Small-scale	SNP	scf_000002_A_fumigatus_A1163	1408118	1408119	C->G	Y	AFUB_022170	1407474	1410369	NA	Ortholog of Neosartorya fischeri NRRL 181 : NFIA_081880, Aspergillus fumigatus A1163 : AFUB_022170 and Aspergillus clavatus NRRL 1 : ACLA_089490
Small-scale	SNP	scf_000002_A_fumigatus_A1163	1408712	1408713	G->C	Y	AFUB_022170	1407474	1410369	NA	Ortholog of Neosartorya fischeri NRRL 181 : NFIA_081880, Aspergillus fumigatus A1163 : AFUB_022170 and Aspergillus clavatus NRRL 1 : ACLA_089490
Small-scale	SNP	scf_000002_A_fumigatus_A1163	1409183	1409184	C->T	Y	AFUB_022170	1407474	1410369	NA	Ortholog of Neosartorya fischeri NRRL 181 : NFIA_081880, Aspergillus fumigatus A1163 : AFUB_022170 and Aspergillus clavatus NRRL 1 : ACLA_089490
Small-scale	SNP	scf_000002_A_fumigatus_A1163	1409294	1409295	A->G	Y	AFUB_022170	1407474	1410369	NA	Ortholog of Neosartorya fischeri NRRL 181 : NFIA_081880, Aspergillus fumigatus A1163 : AFUB_022170 and Aspergillus clavatus NRRL 1 : ACLA_089490
Small-scale	SNP	scf_000002_A_fumigatus_A1163	1409312	1409313	A->G	Y	AFUB_022170	1407474	1410369	NA	Ortholog of Neosartorya fischeri NRRL 181 : NFIA_081880, Aspergillus fumigatus A1163 : AFUB_022170 and Aspergillus clavatus NRRL 1 : ACLA_089490
Small-scale	SNP	scf_000002_A_fumigatus_A1163	1409404	1409405	T->G	Y	AFUB_022170	1407474	1410369	NA	Ortholog of Neosartorya fischeri NRRL 181 : NFIA_081880, Aspergillus fumigatus A1163 : AFUB_022170 and Aspergillus clavatus NRRL 1 : ACLA_089490
Small-scale	SNP	scf_000002_A_fumigatus_A1163	1410966	1410967	T->C	Y	AFUB_022180	1410777	1416569	mp2	Putative glycophosphatidylinositol (GPI)-anchored cell wall protein
Small-scale	SNP	scf_000002_A_fumigatus_A1163	1411010	1411011	C->T	Y	AFUB_022180	1410777	1416569	mp2	Putative glycophosphatidylinositol (GPI)-anchored cell wall protein
Small-scale	SNP	scf_000002_A_fumigatus_A1163	1411706	1411707	A->G	Y	AFUB_022180	1410777	1416569	mp2	Putative glycophosphatidylinositol (GPI)-anchored cell wall protein
Small-scale	SNP	scf_000002_A_fumigatus_A1163	1411836	1411837	T->C	Y	AFUB_022180	1410777	1416569	mp2	Putative glycophosphatidylinositol (GPI)-anchored cell wall protein
Small-scale	SNP	scf_000002_A_fumigatus_A1163	1411880	1411881	T->C	Y	AFUB_022180	1410777	1416569	mp2	Putative glycophosphatidylinositol (GPI)-anchored cell wall protein
Small-scale	SNP	scf_000002_A_fumigatus_A1163	1412197	1412198	T->C	Y	AFUB_022180	1410777	1416569	mp2	Putative glycophosphatidylinositol (GPI)-anchored cell wall protein
Small-scale	SNP	scf_000002_A_fumigatus_A1163	1414116	1414117	T->C	Y	AFUB_022190	1413772	1415670	NA	NA
Small-scale	SNP	scf_000002_A_fumigatus_A1163	1414116	1414117	T->C	Y	AFUB_022180	1410777	1416569	mp2	Putative glycophosphatidylinositol (GPI)-anchored cell wall protein
Small-scale	SNP	scf_000002_A_fumigatus_A1163	1415094	1415095	T->C	Y	AFUB_022190	1413772	1415670	NA	NA
Small-scale	SNP	scf_000002_A_fumigatus_A1163	1415094	1415095	T->C	Y	AFUB_022180	1410777	1416569	mp2	Putative glycophosphatidylinositol (GPI)-anchored cell wall protein
Small-scale	SNP	scf_000002_A_fumigatus_A1163	1415226	1415227	G->A	Y	AFUB_022190	1413772	1415670	NA	NA
Small-scale	SNP	scf_000002_A_fumigatus_A1163	1415226	1415227	G->A	Y	AFUB_022180	1410777	1416569	mp2	Putative glycophosphatidylinositol (GPI)-anchored cell wall protein
Small-scale	SNP	scf_000002_A_fumigatus_A1163	1415280	1415281	G->A	Y	AFUB_022190	1413772	1415670	NA	NA
Small-scale	SNP	scf_000002_A_fumigatus_A1163	1415280	1415281	G->A	Y	AFUB_022180	1410777	1416569	mp2	Putative glycophosphatidylinositol (GPI)-anchored cell wall protein
Small-scale	SNP	scf_000002_A_fumigatus_A1163	1416306	1416307	T->C	Y	AFUB_022180	1410777	1416569	mp2	Putative glycophosphatidylinositol (GPI)-anchored cell wall protein
Small-scale	SNP	scf_000002_A_fumigatus_A1163	1419493	1419494	A->G	Y	AFUB_022200	1419078	1420009	NA	Ortholog of Aspergillus fumigatus A1163 : AFUB_022200
Small-scale	SNP	scf_000002_A_fumigatus_A1163	1419585	1419586	G->A	Y	AFUB_022200	1419078	1420009	NA	Ortholog of Aspergillus fumigatus A1163 : AFUB_022200
Small-scale	SNP	scf_000002_A_fumigatus_A1163	1423816	1423817	A->G	Y	AFUB_022210	1423664	1429461	NA	Has domain(s) with predicted nucleic acid binding, transcription factor activity, sequence-specific DNA binding, zinc ion binding activity, role in regulation of transcription, DNA-templated and nucleus localization
Small-scale	SNP	scf_000002_A_fumigatus_A1163	1423819	1423820	G->A	Y	AFUB_022210	1423664	1429461	NA	Has domain(s) with predicted nucleic acid binding, transcription factor activity, sequence-specific DNA binding, zinc ion binding activity, role in regulation of transcription, DNA-templated and nucleus localization
Small-scale	SNP	scf_000002_A_fumigatus_A1163	1423858	1423859	A->C	Y	AFUB_022210	1423664	1429461	NA	Has domain(s) with predicted nucleic acid binding, transcription factor activity, sequence-specific DNA binding, zinc ion binding activity, role in regulation of transcription, DNA-templated and nucleus localization
Small-scale	SNP	scf_000002_A_fumigatus_A1163	1423961	1423962	T->A	Y	AFUB_022210	1423664	1429461	NA	Has domain(s) with predicted nucleic acid binding, transcription factor activity, sequence-specific DNA binding, zinc ion binding activity, role in regulation of transcription, DNA-templated and nucleus localization
Small-scale	SNP	scf_000002_A_fumigatus_A1163	1424020	1424021	G->T	Y	AFUB_022210	1423664	1429461	NA	Has domain(s) with predicted nucleic acid binding, transcription factor activity, sequence-specific DNA binding, zinc ion binding activity, role in regulation of transcription, DNA-templated and nucleus localization
Small-scale	SNP	scf_000002_A_fumigatus_A1163	1424270	1424271	C->T	Y	AFUB_022210	1423664	1429461	NA	Has domain(s) with predicted nucleic acid binding, transcription factor activity, sequence-specific DNA binding, zinc ion binding activity, role in regulation of transcription, DNA-templated and nucleus localization
Small-scale	SNP	scf_000002_A_fumigatus_A1163	1424385	1424386	C->A	Y	AFUB_022210	1423664	1429461	NA	Has domain(s) with predicted nucleic acid binding, transcription factor activity, sequence-specific DNA binding, zinc ion binding activity, role in regulation of transcription, DNA-templated and nucleus localization
Small-scale	SNP	scf_000002_A_fumigatus_A1163	1424408	1424409	A->G	Y	AFUB_022210	1423664	1429461	NA	Has domain(s) with predicted nucleic acid binding, transcription factor activity, sequence-specific DNA binding, zinc ion binding activity, role in regulation of transcription, DNA-templated and nucleus localization
Small-scale	SNP	scf_000002_A_fumigatus_A1163	1424415	1424416	C->T	Y	AFUB_022210	1423664	1429461	NA	Has domain(s) with predicted nucleic acid binding, transcription factor activity, sequence-specific DNA binding, zinc ion binding activity, role in regulation of transcription, DNA-templated and nucleus localization
Small-scale	SNP	scf_000002_A_fumigatus_A1163	1424429	1424430	T->C	Y	AFUB_022210	1423664	1429461	NA	Has domain(s) with predicted nucleic acid binding, transcription factor activity, sequence-specific DNA binding, zinc ion binding activity, role in regulation of transcription, DNA-templated and nucleus localization
Small-scale	SNP	scf_000002_A_fumigatus_A1163	1424793	1424794	G->A	Y	AFUB_022210	1423664	1429461	NA	Has domain(s) with predicted nucleic acid binding, transcription factor activity, sequence-specific DNA binding, zinc ion binding activity, role in regulation of transcription, DNA-templated and nucleus localization
Small-scale	SNP	scf_000002_A_fumigatus_A1163	1424984	1424985	A->T	Y	AFUB_022210	1423664	1429461	NA	Has domain(s) with predicted nucleic acid binding, transcription factor activity, sequence-specific DNA binding, zinc ion binding activity, role in regulation of transcription, DNA-templated and nucleus localization
Small-scale	SNP	scf_000002_A_fumigatus_A1163	1425859	1425860	A->G	Y	AFUB_022210	1423664	1429461	NA	Has domain(s) with predicted nucleic acid binding, transcription factor activity, sequence-specific DNA binding, zinc ion binding activity, role in regulation of transcription, DNA-templated and nucleus localization
Small-scale	SNP	scf_000002_A_fumigatus_A1163	1426182	1426183	A->G	Y	AFUB_022210	1423664	1429461	NA	Has domain(s) with predicted nucleic acid binding, transcription factor activity, sequence-specific DNA binding, zinc ion binding activity, role in regulation of transcription, DNA-templated and nucleus localization
Small-scale	SNP	scf_000002_A_fumigatus_A1163	1426203	1426204	C->G	Y	AFUB_022210	1423664	1429461	NA	Has domain(s) with predicted nucleic acid binding, transcription factor activity, sequence-specific DNA binding, zinc ion binding activity, role in regulation of transcription, DNA-templated and nucleus localization
Small-scale	SNP	scf_000002_A_fumigatus_A1163	1428102	1428103	G->A	Y	AFUB_022210	1423664	1429461	NA	Has domain(s) with predicted nucleic acid binding, transcription factor activity, sequence-specific DNA binding, zinc ion binding activity, role in regulation of transcription, DNA-templated and nucleus localization
Small-scale	SNP	scf_000002_A_fumigatus_A1163	1428616	1428617	G->A	Y	AFUB_022210	1423664	1429461	NA	Has domain(s) with predicted nucleic acid binding, transcription factor activity, sequence-specific DNA binding, zinc ion binding activity, role in regulation of transcription, DNA-templated and nucleus localization
Small-scale	SNP	scf_000002_A_fumigatus_A1163	1428737	1428738	C->T	Y	AFUB_022210	1423664	1429461	NA	Has domain(s) with predicted nucleic acid binding, transcription factor activity, sequence-specific DNA binding, zinc ion binding activity, role in regulation of transcription, DNA-templated and nucleus localization
Small-scale	SNP	scf_000002_A_fumigatus_A1163	1428741	1428742	C->T	Y	AFUB_022210	1423664	1429461	NA	Has domain(s) with predicted nucleic acid binding, transcription factor activity, sequence-specific DNA binding, zinc ion binding activity, role in regulation of transcription, DNA-templated and nucleus localization
Small-scale	SNP	scf_000002_A_fumigatus_A1163	1428882	1428883	A->G	Y	AFUB_022210	1423664	1429461	NA	Has domain(s) with predicted nucleic acid binding, transcription factor activity, sequence-specific DNA binding, zinc ion binding activity, role in regulation of transcription, DNA-templated and nucleus localization
Small-scale	SNP	scf_000002_A_fumigatus_A1163	1428925	1428926	A->G	Y	AFUB_022210	1423664	1429461	NA	Has domain(s) with predicted nucleic acid binding, transcription factor activity, sequence-specific DNA binding, zinc ion binding activity, role in regulation of transcription, DNA-templated and nucleus localization
Small-scale	SNP	scf_000002_A_fumigatus_A1163	1429182	1429183	C->A	Y	AFUB_022210	1423664	1429461	NA	Has domain(s) with predicted nucleic acid binding, transcription factor activity, sequence-specific DNA binding, zinc ion binding activity, role in regulation of transcription, DNA-templated and nucleus localization
Small-scale	SNP	scf_000002_A_fumigatus_A1163	1429227	1429228	A->G	Y	AFUB_022210	1423664	1429461	NA	Has domain(s) with predicted nucleic acid binding, transcription factor activity, sequence-specific DNA binding, zinc ion binding activity, role in regulation of transcription, DNA-templated and nucleus localization
Small-scale	SNP	scf_000002_A_fumigatus_A1163	1429555	1429556	C->T	Y	AFUB_022220	1429536	1432218	NA	Has domain(s) with predicted substrate-specific transmembrane transporter activity, transmembrane transporter activity, role in transmembrane transport and integral component of membrane, membrane localization
Small-scale	SNP	scf_000002_A_fumigatus_A1163	1431565	1431566	G->A	Y	AFUB_022220	1429536	1432218	NA	Has domain(s) with predicted substrate-specific transmembrane transporter activity, transmembrane transporter activity, role in transmembrane transport and integral component of membrane, membrane localization
Small-scale	SNP	scf_000002_A_fumigatus_A1163	1432128	1432129	A->G	Y	AFUB_022220	1429536	1432218	NA	Has domain(s) with predicted substrate-specific transmembrane transporter activity, transmembrane transporter activity, role in transmembrane transport and integral component of membrane, membrane localization
Small-scale	SNP	scf_000002_A_fumigatus_A1163	1433051	1433052	T->G	Y	AFUB_022230	1432585	1433999	NA	Ortholog(s) have role in syncytium formation by plasma membrane fusion, vacuolar proton-transporting V-type ATPase complex assembly and integral component of endoplasmic reticulum membrane localization
Small-scale	SNP	scf_000002_A_fumigatus_A1163	1434893	1434894	A->G	Y	AFUB_022240	1434230	1436963	NA	Ortholog(s) have anaphase-promoting complex, cytosol localization
Small-scale	SNP	scf_000002_A_fumigatus_A1163	1435389	1435390	A->G	Y	AFUB_022240	1434230	1436963	NA	Ortholog(s) have anaphase-promoting complex, cytosol localization
Small-scale	SNP	scf_000002_A_fumigatus_A1163	1436264	1436265	G->A	Y	AFUB_022240	1434230	1436963	NA	Ortholog(s) have anaphase-promoting complex, cytosol localization
Small-scale	SNP	scf_000002_A_fumigatus_A1163	1436399	1436400	A->G	Y	AFUB_022240	1434230	1436963	NA	Ortholog(s) have anaphase-promoting complex, cytosol localization
Small-scale	SNP	scf_000002_A_fumigatus_A1163	1437647	1437648	T->C	Y	AFUB_022250	1437045	1438687	NA	Has domain(s) with predicted oxidoreductase activity and role in oxidation-reduction process
Small-scale	SNP	scf_000002_A_fumigatus_A1163	1445080	1445081	A->G	Y	AFUB_022280	1444783	1447472	rfeD	putative transcription factor
Small-scale	SNP	scf_000002_A_fumigatus_A1163	1445539	1445540	T->C	Y	AFUB_022280	1444783	1447472	rfeD	putative transcription factor
Small-scale	SNP	scf_000002_A_fumigatus_A1163	1446820	1446821	G->A	Y	AFUB_022280	1444783	1447472	rfeD	putative transcription factor
Small-scale	SNP	scf_000002_A_fumigatus_A1163	1454225	1454226	T->C	Y	AFUB_022300	1453771	1454823	NA	Ortholog of Aspergillus fumigatus A1163 : AFUB_022300
Small-scale	SNP	scf_000002_A_fumigatus_A1163	1463932	1463933	C->A	Y	AFUB_022340	1460995	1465448	NA	Has domain(s) with predicted DNA binding, RNA polymerase II transcription factor activity, sequence-specific DNA binding, zinc ion binding activity and role in regulation of transcription, DNA-templated, transcription, DNA-templated
Small-scale	SNP	scf_000002_A_fumigatus_A1163	1464573	1464574	G->A	Y	AFUB_022340	1460995	1465448	NA	Has domain(s) with predicted DNA binding, RNA polymerase II transcription factor activity, sequence-specific DNA binding, zinc ion binding activity and role in regulation of transcription, DNA-templated, transcription, DNA-templated
Small-scale	SNP	scf_000002_A_fumigatus_A1163	1468404	1468405	G->A	Y	AFUB_022350	1468191	1469106	NA	NA
Small-scale	SNP	scf_000002_A_fumigatus_A1163	1470280	1470281	G->C	Y	AFUB_022360	1469164	1470390	NA	Has domain(s) with predicted role in transmembrane transport and integral component of membrane localization
Small-scale	SNP	scf_000002_A_fumigatus_A1163	1473790	1473791	A->G	Y	AFUB_022370	1473113	1475548	gel4	Essential 1,3-beta-glucanosyltransferase, GPI-anchored to the plasma membrane
Small-scale	SNP	scf_000002_A_fumigatus_A1163	1476286	1476287	C->T	Y	AFUB_022380	1476046	1477555	NA	Putative MFS transporter
Small-scale	SNP	scf_000002_A_fumigatus_A1163	1491371	1491372	C->T	Y	AFUB_022420	1490819	1496329	NA	Has domain(s) with predicted role in intracellular signal transduction
Small-scale	SNP	scf_000002_A_fumigatus_A1163	1493256	1493257	C->G	Y	AFUB_022420	1490819	1496329	NA	Has domain(s) with predicted role in intracellular signal transduction
Small-scale	SNP	scf_000002_A_fumigatus_A1163	1503243	1503244	A->G	Y	AFUB_022440	1499844	1503470	NA	Ortholog of A. nidulans FGSC A4 : AN7504, A. oryzae RIB40 : AO090001000651, Aspergillus wentii : Aspwe1_0121527, Aspergillus sydowii : Aspsy1_0152683 and Aspergillus terreus NIH2624 : ATET_06731
Small-scale	SNP	scf_000002_A_fumigatus_A1163	1510324	1510325	G->C	Y	AFUB_022470	1509314	1510996	NA	Ortholog(s) have cytosol, nucleus localization
Small-scale	SNP	scf_000002_A_fumigatus_A1163	1513880	1513881	A->C	Y	AFUB_022480	1511095	1513906	NA	Mitochondrial NADH dehydrogenase involved in oxidative phosphorylation
Small-scale	SNP	scf_000002_A_fumigatus_A1163	1517288	1517289	A->G	Y	AFUB_022490	1514033	1520168	NA	Ortholog(s) have role in attachment of mitotic spindle microtubules to kinetochore, cohesin localization to chromatin, mitotic sister chromatid cohesion and negative regulation of G0 to G1 transition, more
Small-scale	SNP	scf_000002_A_fumigatus_A1163	1518957	1518958	T->G	Y	AFUB_022490	1514033	1520168	NA	Ortholog(s) have role in attachment of mitotic spindle microtubules to kinetochore, cohesin localization to chromatin, mitotic sister chromatid cohesion and negative regulation of G0 to G1 transition, more
Small-scale	SNP	scf_000002_A_fumigatus_A1163	1524507	1524508	C->T	Y	AFUB_022530	1523978	1525024	NA	Ortholog(s) have proton-transporting ATP synthase activity, rotational mechanism activity and role in ATP synthesis coupled proton transportNA
Small-scale	SNP	scf_000002_A_fumigatus_A1163	1525969	1525970	G->C	Y	AFUB_022540	1525193	1530346	NA	Ortholog of A. nidulans FGSC A4 : AN7496, A. niger CBS 513.88 : An02g13860, A. oryzae RIB40 : AO090001000663, Aspergillus wentii : Aspwe1_0121457 and Aspergillus sydowii : Aspsy1_0058467
Small-scale	SNP	scf_000002_A_fumigatus_A1163	1532233	1532234	T->C	Y	AFUB_022550	1530457	1532339	NA	Ortholog(s) have H4 histone acetyltransferase activity, histone acetyltransferase activity (H3-K4 specific), peptide N-acetyltransferase activity
Small-scale	SNP	scf_000002_A_fumigatus_A1163	1533827	1533828	C->T	Y	AFUB_022560	1533009	1535573	NA	Ortholog(s) have DNA binding activity, role in mRNA cis splicing, via spliceosome and Prp19 complex, cytosol, spliceosomal complex localization
Small-scale	SNP	scf_000002_A_fumigatus_A1163	1539023	1539024	A->G	Y	AFUB_022590	1538992	1540280	NA	Ortholog of Aspergillus fumigatus A1163 : AFUB_022590
Small-scale	SNP	scf_000002_A_fumigatus_A1163	1539263	1539264	T->C	Y	AFUB_022590	1538992	1540280	NA	Ortholog of Aspergillus fumigatus A1163 : AFUB_022590
Small-scale	SNP	scf_000002_A_fumigatus_A1163	1539512	1539513	C->G	Y	AFUB_022590	1538992	1540280	NA	Ortholog of Aspergillus fumigatus A1163 : AFUB_022590
Small-scale	SNP	scf_000002_A_fumigatus_A1163	1541012	1541013	G->A	Y	AFUB_022600	1540338	1541649	NA	Ortholog(s) have RNA 7-methylguanosine cap binding, exoribonuclease activator activity, m7G(5')pppN diphosphatase activity
Small-scale	SNP	scf_000002_A_fumigatus_A1163	1543143	1543144	A->G	Y	AFUB_022620	1542934	1544533	NA	Ortholog(s) have cytosol localization
Small-scale	SNP	scf_000002_A_fumigatus_A1163	1552465	1552466	G->A	Y	AFUB_022640	1551655	1554301	NA	Ortholog(s) have histone binding activity, role in histone exchange and Swr1 complex, cytoplasm localization
Small-scale	SNP	scf_000002_A_fumigatus_A1163	1553566	1553567	G->A	Y	AFUB_022640	1551655	1554301	NA	Ortholog(s) have histone binding activity, role in histone exchange and Swr1 complex, cytoplasm localization
Small-scale	SNP	scf_000002_A_fumigatus_A1163	1557092	1557093	T->C	Y	AFUB_022650	1556672	1559941	NA	Ortholog of A. nidulans FGSC A4 : AN7476, A. niger CBS 513.88 : An02g14010, A. oryzae RIB40 : AO090001000675, Aspergillus wentii : Aspwe1_0120551 and Aspergillus sydowii : Aspsy1_0058449
Small-scale	SNP	scf_000002_A_fumigatus_A1163	1559240	1559241	G->A	Y	AFUB_022650	1556672	1559941	NA	Ortholog of A. nidulans FGSC A4 : AN7476, A. niger CBS 513.88 : An02g14010, A. oryzae RIB40 : AO090001000675, Aspergillus wentii : Aspwe1_0120551 and Aspergillus sydowii : Aspsy1_0058449
Small-scale	SNP	scf_000002_A_fumigatus_A1163	1571341	1571342	T->G	Y	AFUB_022700	1571151	1573667	NA	Ortholog(s) have poly(U) RNA binding activity, role in negative regulation of induction of conjugation with cellular fusion by negative regulation of transcription from RNA polymerase II promoter and cytosol localization
Small-scale	SNP	scf_000002_A_fumigatus_A1163	1572464	1572465	C->A	Y	AFUB_022700	1571151	1573667	NA	Ortholog(s) have poly(U) RNA binding activity, role in negative regulation of induction of conjugation with cellular fusion by negative regulation of transcription from RNA polymerase II promoter and cytosol localization
Small-scale	SNP	scf_000002_A_fumigatus_A1163	1592767	1592768	G->C	Y	AFUB_022730	1592063	1593852	NA	Ortholog of A. oryzae RIB40 : AO090001000687, Neosartorya fischeri NRRL 181 : NFIA_082420, Aspergillus clavatus NRRL 1 : ACLA_068640 and Aspergillus sydowii : Aspsy1_0090059
Small-scale	SNP	scf_000002_A_fumigatus_A1163	1592851	1592852	T->C	Y	AFUB_022730	1592063	1593852	NA	Ortholog of A. oryzae RIB40 : AO090001000687, Neosartorya fischeri NRRL 181 : NFIA_082420, Aspergillus clavatus NRRL 1 : ACLA_068640 and Aspergillus sydowii : Aspsy1_0090059
Small-scale	SNP	scf_000002_A_fumigatus_A1163	1592857	1592858	T->C	Y	AFUB_022730	1592063	1593852	NA	Ortholog of A. oryzae RIB40 : AO090001000687, Neosartorya fischeri NRRL 181 : NFIA_082420, Aspergillus clavatus NRRL 1 : ACLA_068640 and Aspergillus sydowii : Aspsy1_0090059
Small-scale	SNP	scf_000002_A_fumigatus_A1163	1595387	1595388	A->T	Y	AFUB_022740	1594415	1595989	NA	Ortholog of A. nidulans FGSC A4 : AN4092, AN7483, A. oryzae RIB40 : AO090001000688, Neosartorya fischeri NRRL 181 : NFIA_082430 and Aspergillus versicolor : Aspve1_0043503
Small-scale	SNP	scf_000002_A_fumigatus_A1163	1600415	1600416	A->G	Y	AFUB_022760	1598521	1601899	mirC	Putative siderophore transporter
Small-scale	SNP	scf_000002_A_fumigatus_A1163	1609168	1609169	G->T	Y	AFUB_022790	1608118	1610607	NA	Putative beta-ketoacyl synthase
Small-scale	SNP	scf_000002_A_fumigatus_A1163	1612173	1612174	A->G	Y	AFUB_022800	1610835	1612579	NA	Ortholog(s) have SAGA complex localization
Small-scale	SNP	scf_000002_A_fumigatus_A1163	1613896	1613897	C->A	Y	AFUB_022810	1612955	1614202	NA	Ortholog(s) have mRNA guanylyltransferase activity, role in 7-methylguanosine RNA capping and nucleus localization
Small-scale	SNP	scf_000002_A_fumigatus_A1163	1625114	1625115	T->A	Y	AFUB_022860	1623197	1625620	acuK	Putative transcription factor involved in regulation of gluconeogenesis and acquisition of iron
Small-scale	SNP	scf_000002_A_fumigatus_A1163	1629901	1629902	C->T	Y	AFUB_022870	1628409	1631011	NA	Putative MFS multidrug transporter
Small-scale	SNP	scf_000002_A_fumigatus_A1163	1633445	1633446	G->C	Y	AFUB_022880	1631915	1633797	NA	Ortholog(s) have role in double-strand break repair via homologous recombination, mitotic sister chromatid cohesion and horsetail nucleus leading edge, nuclear mitotic cohesin complex localization
Small-scale	SNP	scf_000002_A_fumigatus_A1163	1636994	1636995	T->C	Y	AFUB_022890	1634690	1638561	pmr1	Putative golgi apparatus Ca2+/Mn2+ P-type ATPase
Small-scale	SNP	scf_000002_A_fumigatus_A1163	1637542	1637543	T->C	Y	AFUB_022890	1634690	1638561	pmr1	Putative golgi apparatus Ca2+/Mn2+ P-type ATPase
Small-scale	SNP	scf_000002_A_fumigatus_A1163	1637611	1637612	G->C	Y	AFUB_022890	1634690	1638561	pmr1	Putative golgi apparatus Ca2+/Mn2+ P-type ATPase
Small-scale	SNP	scf_000002_A_fumigatus_A1163	1637921	1637922	A->C	Y	AFUB_022890	1634690	1638561	pmr1	Putative golgi apparatus Ca2+/Mn2+ P-type ATPase
Small-scale	SNP	scf_000002_A_fumigatus_A1163	1641816	1641817	C->T	Y	AFUB_022920	1641817	1643699	meaA	Putative ammonium transporter
Small-scale	SNP	scf_000002_A_fumigatus_A1163	1642386	1642387	T->A	Y	AFUB_022920	1641817	1643699	meaA	Putative ammonium transporter
Small-scale	SNP	scf_000002_A_fumigatus_A1163	1642758	1642759	T->G	Y	AFUB_022920	1641817	1643699	meaA	Putative ammonium transporter
Small-scale	SNP	scf_000002_A_fumigatus_A1163	1642773	1642774	C->T	Y	AFUB_022920	1641817	1643699	meaA	Putative ammonium transporter
Small-scale	SNP	scf_000002_A_fumigatus_A1163	1643597	1643598	T->C	Y	AFUB_022920	1641817	1643699	meaA	Putative ammonium transporter
Small-scale	SNP	scf_000002_A_fumigatus_A1163	1643609	1643610	C->T	Y	AFUB_022920	1641817	1643699	meaA	Putative ammonium transporter
Small-scale	SNP	scf_000002_A_fumigatus_A1163	1644579	1644580	C->T	Y	AFUB_022930	1644225	1647099	NA	Ortholog(s) have role in CVT pathway, establishment of cell polarity, filamentous growth of a population of unicellular organisms, pexophagy, retrograde transport, vesicle recycling within Golgi
Small-scale	SNP	scf_000002_A_fumigatus_A1163	1645699	1645700	G->A	Y	AFUB_022930	1644225	1647099	NA	Ortholog(s) have role in CVT pathway, establishment of cell polarity, filamentous growth of a population of unicellular organisms, pexophagy, retrograde transport, vesicle recycling within Golgi
Small-scale	SNP	scf_000002_A_fumigatus_A1163	1646251	1646252	G->T	Y	AFUB_022930	1644225	1647099	NA	Ortholog(s) have role in CVT pathway, establishment of cell polarity, filamentous growth of a population of unicellular organisms, pexophagy, retrograde transport, vesicle recycling within Golgi
Small-scale	SNP	scf_000002_A_fumigatus_A1163	1662376	1662377	C->T	Y	AFUB_023010	1661087	1666901	NA	Has domain(s) with predicted zinc ion binding activity
Small-scale	SNP	scf_000002_A_fumigatus_A1163	1663818	1663819	T->C	Y	AFUB_023010	1661087	1666901	NA	Has domain(s) with predicted zinc ion binding activity
Small-scale	SNP	scf_000002_A_fumigatus_A1163	1666606	1666607	T->C	Y	AFUB_023010	1661087	1666901	NA	Has domain(s) with predicted zinc ion binding activity
Small-scale	SNP	scf_000002_A_fumigatus_A1163	1667730	1667731	G->A	Y	AFUB_023020	1666910	1669641	NA	Ortholog of S. cerevisiae : TDA6, A. nidulans FGSC A4 : AN7454, A. niger CBS 513.88 : An02g14280, A. oryzae RIB40 : AO090001000716 and Aspergillus wentii : Aspwe1_0055229
Small-scale	SNP	scf_000002_A_fumigatus_A1163	1669318	1669319	T->A	Y	AFUB_023020	1666910	1669641	NA	Ortholog of S. cerevisiae : TDA6, A. nidulans FGSC A4 : AN7454, A. niger CBS 513.88 : An02g14280, A. oryzae RIB40 : AO090001000716 and Aspergillus wentii : Aspwe1_0055229
Small-scale	SNP	scf_000002_A_fumigatus_A1163	1669323	1669324	A->G	Y	AFUB_023020	1666910	1669641	NA	Ortholog of S. cerevisiae : TDA6, A. nidulans FGSC A4 : AN7454, A. niger CBS 513.88 : An02g14280, A. oryzae RIB40 : AO090001000716 and Aspergillus wentii : Aspwe1_0055229
Small-scale	SNP	scf_000002_A_fumigatus_A1163	1683269	1683270	T->C	Y	AFUB_023080	1682904	1687051	NA	Putative NAD+ dependent glutamate dehydrogenase
Small-scale	SNP	scf_000002_A_fumigatus_A1163	1696887	1696888	G->T	Y	AFUB_023130	1695835	1699506	NA	Ortholog of A. nidulans FGSC A4 : AN10954, A. niger CBS 513.88 : An02g14630, A. oryzae RIB40 : AO090001000720, AO090113000187 and Aspergillus tubingensis : Asptu1_0042313
Small-scale	SNP	scf_000002_A_fumigatus_A1163	1699394	1699395	G->A	Y	AFUB_023130	1695835	1699506	NA	Ortholog of A. nidulans FGSC A4 : AN10954, A. niger CBS 513.88 : An02g14630, A. oryzae RIB40 : AO090001000720, AO090113000187 and Aspergillus tubingensis : Asptu1_0042313
Small-scale	SNP	scf_000002_A_fumigatus_A1163	1699649	1699650	C->A	Y	AFUB_023140	1699533	1702137	NA	Ortholog(s) have transcription coactivator activity, role in histone acetylation, transcription from RNA polymerase II promoter and Ada2/Gcn5/Ada3 transcription activator complex, SAGA complex, SLIK (SAGA-like) complex localization
Small-scale	SNP	scf_000002_A_fumigatus_A1163	1712416	1712417	T->C	Y	AFUB_023170	1709002	1712685	NA	Ortholog(s) have nucleus localization
Small-scale	SNP	scf_000002_A_fumigatus_A1163	1715155	1715156	G->A	Y	AFUB_023180	1713670	1716763	NA	Ortholog of A. nidulans FGSC A4 : AN7443, A. niger CBS 513.88 : An02g14710, A. oryzae RIB40 : AO090001000726, Aspergillus wentii : Aspwe1_0110234 and Aspergillus sydowii : Aspsy1_0152786
Small-scale	SNP	scf_000002_A_fumigatus_A1163	1721891	1721892	T->C	Y	AFUB_023190	1720463	1722435	NA	Ortholog(s) have role in chromatin silencing at centromere, histone acetylation, histone exchange, mitotic sister chromatid biorientation and Ino80 complex, NuA4 histone acetyltransferase complex, Swr1 complex localization
Small-scale	SNP	scf_000002_A_fumigatus_A1163	1722571	1722572	C->T	Y	AFUB_023200	1722508	1725662	NA	Ortholog of A. nidulans FGSC A4 : AN7433, A. niger CBS 513.88 : An02g14760, Aspergillus wentii : Aspwe1_0110312, Aspergillus sydowii : Aspsy1_0153514 and Aspergillus terreus NIH2624 : ATET_05606
Small-scale	SNP	scf_000002_A_fumigatus_A1163	1731363	1731364	A->G	Y	AFUB_023230	1731297	1733698	pdiA	Putative protein disulfide isomerase
Small-scale	SNP	scf_000002_A_fumigatus_A1163	1739626	1739627	T->G	Y	AFUB_023250	1739258	1742004	NA	Ortholog(s) have L-amino acid transmembrane transporter activity, role in L-alpha-amino acid transmembrane transport and fungal-type vacuole membrane localization
Small-scale	SNP	scf_000002_A_fumigatus_A1163	1740594	1740595	T->C	Y	AFUB_023250	1739258	1742004	NA	Ortholog(s) have L-amino acid transmembrane transporter activity, role in L-alpha-amino acid transmembrane transport and fungal-type vacuole membrane localization
Small-scale	SNP	scf_000002_A_fumigatus_A1163	1741466	1741467	A->G	Y	AFUB_023250	1739258	1742004	NA	Ortholog(s) have L-amino acid transmembrane transporter activity, role in L-alpha-amino acid transmembrane transport and fungal-type vacuole membrane localization
Small-scale	SNP	scf_000002_A_fumigatus_A1163	1744841	1744842	T->A	Y	AFUB_023260	1744019	1748100	NA	Has domain(s) with predicted RNA polymerase II transcription cofactor activity, role in regulation of transcription from RNA polymerase II promoter and mediator complex localization
Small-scale	SNP	scf_000002_A_fumigatus_A1163	1749323	1749324	G->A	Y	AFUB_023270	1748477	1750765	NA	Ortholog(s) have DNA-directed DNA polymerase activity, double-stranded DNA binding, single-stranded DNA binding activity
Small-scale	SNP	scf_000002_A_fumigatus_A1163	1750340	1750341	A->G	Y	AFUB_023270	1748477	1750765	NA	Ortholog(s) have DNA-directed DNA polymerase activity, double-stranded DNA binding, single-stranded DNA binding activity
Small-scale	SNP	scf_000002_A_fumigatus_A1163	1779803	1779804	A->G	Y	AFUB_023300	1776853	1780130	NA	Ortholog(s) have nucleus localization
Small-scale	SNP	scf_000002_A_fumigatus_A1163	1789011	1789012	T->G	Y	AFUB_023340	1788167	1791098	NA	Ortholog of Aspergillus fumigatus A1163 : AFUB_023340
Small-scale	SNP	scf_000002_A_fumigatus_A1163	1797106	1797107	A->G	Y	AFUB_023390	1796573	1798561	NA	Ortholog(s) have ATP-dependent RNA helicase activity and role in endonucleolytic cleavage in ITS1 upstream of 5.8S rRNA from tricistronic rRNA transcript (SSU-rRNA, 5.8S rRNA, LSU-rRNA)
Small-scale	SNP	scf_000002_A_fumigatus_A1163	1804685	1804686	A->G	Y	AFUB_023410	1803020	1805570	NA	Putative ubiquitin C-terminal hydrolase
Small-scale	SNP	scf_000002_A_fumigatus_A1163	1849775	1849776	G->A	Y	AFUB_023420	1849380	1851494	NA	Ortholog(s) have role in cleistothecium development and COP9 signalosome localization
Small-scale	SNP	scf_000002_A_fumigatus_A1163	1859865	1859866	G->A	Y	AFUB_023460	1859397	1862084	NA	Ortholog(s) have role in anisotropic cell growth, hyphal growth
Small-scale	SNP	scf_000002_A_fumigatus_A1163	1866688	1866689	T->C	Y	AFUB_023480	1865871	1869693	NA	Ortholog(s) have mitochondrion localization
Small-scale	SNP	scf_000002_A_fumigatus_A1163	1868276	1868277	T->C	Y	AFUB_023480	1865871	1869693	NA	Ortholog(s) have mitochondrion localization
Small-scale	SNP	scf_000002_A_fumigatus_A1163	1868775	1868776	G->A	Y	AFUB_023480	1865871	1869693	NA	Ortholog(s) have mitochondrion localization
Small-scale	SNP	scf_000002_A_fumigatus_A1163	1868776	1868777	G->A	Y	AFUB_023480	1865871	1869693	NA	Ortholog(s) have mitochondrion localization
Small-scale	SNP	scf_000002_A_fumigatus_A1163	1889365	1889366	T->C	Y	AFUB_023500	1889169	1892224	NA	Ortholog(s) have endoplasmic reticulum localization
Small-scale	SNP	scf_000002_A_fumigatus_A1163	1924563	1924564	A->G	Y	AFUB_023650	1923887	1925243	NA	Has domain(s) with predicted oxidoreductase activity and role in metabolic process
Small-scale	SNP	scf_000002_A_fumigatus_A1163	1924623	1924624	T->C	Y	AFUB_023650	1923887	1925243	NA	Has domain(s) with predicted oxidoreductase activity and role in metabolic process
Small-scale	SNP	scf_000002_A_fumigatus_A1163	1931735	1931736	T->C	Y	AFUB_023680	1931601	1933826	NA	Ortholog of A. nidulans FGSC A4 : AN5826, A. niger CBS 513.88 : An05g00180, Neosartorya fischeri NRRL 181 : NFIA_083370, Aspergillus wentii : Aspwe1_0043748 and Aspergillus versicolor : Aspve1_0082576
Small-scale	SNP	scf_000002_A_fumigatus_A1163	1937981	1937982	T->G	Y	AFUB_023700	1937257	1938021	NA	Ortholog(s) have cytosol, nucleus localization
Small-scale	SNP	scf_000002_A_fumigatus_A1163	1957742	1957743	T->G	Y	AFUB_023750	1957505	1960867	NA	Has domain(s) with predicted ATP binding, ATP-dependent helicase activity, helicase activity, nucleic acid binding, nucleoside-triphosphatase activity, nucleotide binding activity and role in mRNA processing
Small-scale	SNP	scf_000002_A_fumigatus_A1163	1958173	1958174	A->G	Y	AFUB_023750	1957505	1960867	NA	Has domain(s) with predicted ATP binding, ATP-dependent helicase activity, helicase activity, nucleic acid binding, nucleoside-triphosphatase activity, nucleotide binding activity and role in mRNA processing
Small-scale	SNP	scf_000002_A_fumigatus_A1163	1964021	1964022	C->T	Y	AFUB_023770	1961890	1966773	NA	Has domain(s) with predicted phospholipid binding activity, role in cortical protein anchoring and cell cortex localization
Small-scale	SNP	scf_000002_A_fumigatus_A1163	1964431	1964432	A->G	Y	AFUB_023770	1961890	1966773	NA	Has domain(s) with predicted phospholipid binding activity, role in cortical protein anchoring and cell cortex localization
Small-scale	SNP	scf_000002_A_fumigatus_A1163	1969062	1969063	T->C	Y	AFUB_023780	1969016	1969102	NA	Ortholog of Neosartorya fischeri NRRL 181 : NFIA_083460 and Aspergillus fumigatus A1163 : AFUB_023780
Small-scale	SNP	scf_000002_A_fumigatus_A1163	1969083	1969084	T->A	Y	AFUB_023780	1969016	1969102	NA	Ortholog of Neosartorya fischeri NRRL 181 : NFIA_083460 and Aspergillus fumigatus A1163 : AFUB_023780
Small-scale	SNP	scf_000002_A_fumigatus_A1163	1969084	1969085	T->G	Y	AFUB_023780	1969016	1969102	NA	Ortholog of Neosartorya fischeri NRRL 181 : NFIA_083460 and Aspergillus fumigatus A1163 : AFUB_023780
Small-scale	SNP	scf_000002_A_fumigatus_A1163	1981140	1981141	C->T	Y	AFUB_023830	1980342	1981243	NA	Putative glycine rich cell wall structural protein
Small-scale	SNP	scf_000002_A_fumigatus_A1163	1990998	1990999	T->C	Y	AFUB_023890	1989165	1991148	NA	Patatin-like serine hydrolase
Small-scale	SNP	scf_000002_A_fumigatus_A1163	1992808	1992809	T->A	Y	AFUB_023900	1991474	1994433	NA	Has domain(s) with predicted magnesium ion transmembrane transporter activity, role in magnesium ion transport and integral component of membrane localization
Small-scale	SNP	scf_000002_A_fumigatus_A1163	1995105	1995106	G->A	Y	AFUB_023910	1994547	1995874	NA	Ortholog of A. nidulans FGSC A4 : AN6298, A. niger CBS 513.88 : An05g00450, A. oryzae RIB40 : AO090011000911, Neosartorya fischeri NRRL 181 : NFIA_083580 and Aspergillus wentii : Aspwe1_0053560
Small-scale	SNP	scf_000002_A_fumigatus_A1163	2013697	2013698	G->A	Y	AFUB_023940	2013616	2015237	NA	Has domain(s) with predicted electron carrier activity, heme binding, iron ion binding, oxidoreductase activity, acting on paired donors, with incorporation or reduction of molecular oxygen activity and role in oxidation-reduction process
Small-scale	SNP	scf_000002_A_fumigatus_A1163	2017267	2017268	T->C	Y	AFUB_023960	2016146	2018278	NA	Has domain(s) with predicted FMN binding, iron ion binding, oxidoreductase activity and role in oxidation-reduction process
Small-scale	SNP	scf_000002_A_fumigatus_A1163	2019066	2019067	A->G	Y	AFUB_023970	2018421	2023250	NA	Ortholog(s) have cytosol localization
Small-scale	SNP	scf_000002_A_fumigatus_A1163	2022842	2022843	A->G	Y	AFUB_023970	2018421	2023250	NA	Ortholog(s) have cytosol localization
Small-scale	SNP	scf_000002_A_fumigatus_A1163	2025838	2025839	T->C	Y	AFUB_023980	2023554	2032257	NA	Ortholog(s) have role in regulation of translational elongation and cytosolic ribosome, extracellular region, mitochondrion localization
Small-scale	SNP	scf_000002_A_fumigatus_A1163	2027258	2027259	A->G	Y	AFUB_023980	2023554	2032257	NA	Ortholog(s) have role in regulation of translational elongation and cytosolic ribosome, extracellular region, mitochondrion localization
Small-scale	SNP	scf_000002_A_fumigatus_A1163	2033155	2033156	T->C	Y	AFUB_023990	2032743	2033647	NA	60S ribosomal protein L19
Small-scale	SNP	scf_000002_A_fumigatus_A1163	2034665	2034666	A->G	Y	AFUB_024010	2034647	2037241	NA	Ortholog of A. nidulans FGSC A4 : AN5847, A. niger CBS 513.88 : An05g00550, Neosartorya fischeri NRRL 181 : NFIA_083670 and Aspergillus wentii : Aspwe1_0175059, Aspwe1_0670697
Small-scale	SNP	scf_000002_A_fumigatus_A1163	2037106	2037107	T->C	Y	AFUB_024010	2034647	2037241	NA	Ortholog of A. nidulans FGSC A4 : AN5847, A. niger CBS 513.88 : An05g00550, Neosartorya fischeri NRRL 181 : NFIA_083670 and Aspergillus wentii : Aspwe1_0175059, Aspwe1_0670697
Small-scale	SNP	scf_000002_A_fumigatus_A1163	2042922	2042923	A->G	Y	AFUB_024040	2042303	2043032	NA	Ortholog of Aspergillus fumigatus A1163 : AFUB_024040
Small-scale	SNP	scf_000002_A_fumigatus_A1163	2056843	2056844	G->A	Y	AFUB_024070	2056598	2074346	lah	Protein involved in tethering Woronin bodies to septal pore
Small-scale	SNP	scf_000002_A_fumigatus_A1163	2057256	2057257	T->C	Y	AFUB_024070	2056598	2074346	lah	Protein involved in tethering Woronin bodies to septal pore
Small-scale	SNP	scf_000002_A_fumigatus_A1163	2058117	2058118	C->T	Y	AFUB_024070	2056598	2074346	lah	Protein involved in tethering Woronin bodies to septal pore
Small-scale	SNP	scf_000002_A_fumigatus_A1163	2058807	2058808	A->C	Y	AFUB_024070	2056598	2074346	lah	Protein involved in tethering Woronin bodies to septal pore
Small-scale	SNP	scf_000002_A_fumigatus_A1163	2063327	2063328	T->G	Y	AFUB_024070	2056598	2074346	lah	Protein involved in tethering Woronin bodies to septal pore
Small-scale	SNP	scf_000002_A_fumigatus_A1163	2064276	2064277	T->A	Y	AFUB_024070	2056598	2074346	lah	Protein involved in tethering Woronin bodies to septal pore
Small-scale	SNP	scf_000002_A_fumigatus_A1163	2066431	2066432	A->G	Y	AFUB_024070	2056598	2074346	lah	Protein involved in tethering Woronin bodies to septal pore
Small-scale	SNP	scf_000002_A_fumigatus_A1163	2075178	2075179	G->C	Y	AFUB_024080	2074606	2078183	NA	Protein described as similar to the S. cervisiae magnesium transporter, Alr1p
Small-scale	SNP	scf_000002_A_fumigatus_A1163	2076478	2076479	T->C	Y	AFUB_024080	2074606	2078183	NA	Protein described as similar to the S. cervisiae magnesium transporter, Alr1p
Small-scale	SNP	scf_000002_A_fumigatus_A1163	2081597	2081598	A->T	Y	AFUB_024090	2079545	2082265	NA	Ortholog(s) have role in cellular response to biotic stimulus, filamentous growth of a population of unicellular organisms in response to biotic stimulus, vacuole inheritance
Small-scale	SNP	scf_000002_A_fumigatus_A1163	2089121	2089122	A->C	Y	AFUB_024120	2088683	2090669	NA	Has domain(s) with predicted ATP binding, glucose binding, hexokinase activity, phosphotransferase activity, alcohol group as acceptor activity
Small-scale	SNP	scf_000002_A_fumigatus_A1163	2089668	2089669	A->G	Y	AFUB_024120	2088683	2090669	NA	Has domain(s) with predicted ATP binding, glucose binding, hexokinase activity, phosphotransferase activity, alcohol group as acceptor activity
Small-scale	SNP	scf_000002_A_fumigatus_A1163	2089846	2089847	C->T	Y	AFUB_024120	2088683	2090669	NA	Has domain(s) with predicted ATP binding, glucose binding, hexokinase activity, phosphotransferase activity, alcohol group as acceptor activity
Small-scale	SNP	scf_000002_A_fumigatus_A1163	2090602	2090603	T->C	Y	AFUB_024120	2088683	2090669	NA	Has domain(s) with predicted ATP binding, glucose binding, hexokinase activity, phosphotransferase activity, alcohol group as acceptor activity
Small-scale	SNP	scf_000002_A_fumigatus_A1163	2093416	2093417	G->A	Y	AFUB_024130	2091316	2093472	hxt8	Major facilitator superfamily (MFS) monosaccharide transporter
Small-scale	SNP	scf_000002_A_fumigatus_A1163	2099921	2099922	G->A	Y	AFUB_024170	2098682	2100002	NA	Has domain(s) with predicted role in regulation of transcription, DNA-templated and integral component of membrane, nucleus localization
Small-scale	SNP	scf_000002_A_fumigatus_A1163	2099934	2099935	T->G	Y	AFUB_024170	2098682	2100002	NA	Has domain(s) with predicted role in regulation of transcription, DNA-templated and integral component of membrane, nucleus localization
Small-scale	SNP	scf_000002_A_fumigatus_A1163	2104836	2104837	C->T	Y	AFUB_024200	2104585	2105653	NA	Ortholog(s) have cytosol, nucleus localization
Small-scale	SNP	scf_000002_A_fumigatus_A1163	2105585	2105586	C->T	Y	AFUB_024200	2104585	2105653	NA	Ortholog(s) have cytosol, nucleus localization
Small-scale	SNP	scf_000002_A_fumigatus_A1163	2108432	2108433	A->G	Y	AFUB_024210	2105835	2110449	NA	Has domain(s) with predicted role in transmembrane transport and integral component of membrane localization
Small-scale	SNP	scf_000002_A_fumigatus_A1163	2109105	2109106	G->A	Y	AFUB_024210	2105835	2110449	NA	Has domain(s) with predicted role in transmembrane transport and integral component of membrane localization
Small-scale	SNP	scf_000002_A_fumigatus_A1163	2109170	2109171	G->T	Y	AFUB_024210	2105835	2110449	NA	Has domain(s) with predicted role in transmembrane transport and integral component of membrane localization
Small-scale	SNP	scf_000002_A_fumigatus_A1163	2109191	2109192	A->G	Y	AFUB_024210	2105835	2110449	NA	Has domain(s) with predicted role in transmembrane transport and integral component of membrane localization
Small-scale	SNP	scf_000002_A_fumigatus_A1163	2111075	2111076	G->A	Y	AFUB_024220	2110815	2113165	NA	Ortholog(s) have sequence-specific DNA binding activity and nucleus localization
Small-scale	SNP	scf_000002_A_fumigatus_A1163	2113977	2113978	G->A	Y	AFUB_024230	2113395	2114911	NA	Has domain(s) with predicted NAD binding, coenzyme binding, glycerol-3-phosphate dehydrogenase [NAD+] activity, oxidoreductase activity, acting on the CH-OH group of donors, NAD or NADP as acceptor activity
Small-scale	SNP	scf_000002_A_fumigatus_A1163	2114522	2114523	T->C	Y	AFUB_024230	2113395	2114911	NA	Has domain(s) with predicted NAD binding, coenzyme binding, glycerol-3-phosphate dehydrogenase [NAD+] activity, oxidoreductase activity, acting on the CH-OH group of donors, NAD or NADP as acceptor activity
Small-scale	SNP	scf_000002_A_fumigatus_A1163	2124711	2124712	A->G	Y	AFUB_024260	2123071	2125789	NA	Ortholog of A. nidulans FGSC A4 : AN6169, A. niger CBS 513.88 : An05g00900, A. oryzae RIB40 : AO090011000875, Aspergillus wentii : Aspwe1_0674836 and Aspergillus sydowii : Aspsy1_0058068
Small-scale	SNP	scf_000002_A_fumigatus_A1163	2124877	2124878	A->C	Y	AFUB_024260	2123071	2125789	NA	Ortholog of A. nidulans FGSC A4 : AN6169, A. niger CBS 513.88 : An05g00900, A. oryzae RIB40 : AO090011000875, Aspergillus wentii : Aspwe1_0674836 and Aspergillus sydowii : Aspsy1_0058068
Small-scale	SNP	scf_000002_A_fumigatus_A1163	2125048	2125049	C->A	Y	AFUB_024260	2123071	2125789	NA	Ortholog of A. nidulans FGSC A4 : AN6169, A. niger CBS 513.88 : An05g00900, A. oryzae RIB40 : AO090011000875, Aspergillus wentii : Aspwe1_0674836 and Aspergillus sydowii : Aspsy1_0058068
Small-scale	SNP	scf_000002_A_fumigatus_A1163	2134786	2134787	A->G	Y	AFUB_024300	2134411	2136584	NA	Ortholog(s) have Golgi apparatus, cell division site, cell tip, endoplasmic reticulum localization
Small-scale	SNP	scf_000002_A_fumigatus_A1163	2137856	2137857	A->G	Y	AFUB_024310	2137707	2138611	pyrG	Orotidine 5'-monophosphate decarboxylase
Small-scale	SNP	scf_000002_A_fumigatus_A1163	2139524	2139525	G->A	Y	AFUB_024320	2139040	2139630	NA	Predicted glutathione S transferase
Small-scale	SNP	scf_000002_A_fumigatus_A1163	2150658	2150659	T->C	Y	AFUB_024380	2150239	2151281	NA	Has domain(s) with predicted acetyltransferase activity
Small-scale	SNP	scf_000002_A_fumigatus_A1163	2156999	2157000	T->C	Y	AFUB_024390	2152697	2161033	NA	Has domain(s) with predicted ubiquitinyl hydrolase activity and role in protein deubiquitination, ubiquitin-dependent protein catabolic process
Small-scale	SNP	scf_000002_A_fumigatus_A1163	2158515	2158516	A->G	Y	AFUB_024390	2152697	2161033	NA	Has domain(s) with predicted ubiquitinyl hydrolase activity and role in protein deubiquitination, ubiquitin-dependent protein catabolic process
Small-scale	SNP	scf_000002_A_fumigatus_A1163	2162408	2162409	G->T	Y	AFUB_024400	2161761	2163252	NA	Ortholog(s) have transcription factor TFIIE complex localization
Small-scale	SNP	scf_000002_A_fumigatus_A1163	2170518	2170519	C->T	Y	AFUB_024420	2166103	2171519	bud4	GTP binding protein (Bud4)
Small-scale	SNP	scf_000002_A_fumigatus_A1163	2171177	2171178	A->G	Y	AFUB_024420	2166103	2171519	bud4	GTP binding protein (Bud4)
Small-scale	SNP	scf_000002_A_fumigatus_A1163	2171466	2171467	A->G	Y	AFUB_024420	2166103	2171519	bud4	GTP binding protein (Bud4)
Small-scale	SNP	scf_000002_A_fumigatus_A1163	2173574	2173575	G->A	Y	AFUB_024430	2171784	2173856	mrh4	ATP-dependent RNA helicase
Small-scale	SNP	scf_000002_A_fumigatus_A1163	2176020	2176021	A->T	Y	AFUB_024450	2175919	2178117	NA	Ortholog(s) have histone methyltransferase activity (H4-K20 specific), nucleosome binding activity and role in cellular protein localization, chromatin silencing, histone H4-K20 methylation, mitotic DNA damage checkpoint
Small-scale	SNP	scf_000002_A_fumigatus_A1163	2200789	2200790	T->C	Y	AFUB_024560	2197393	2201225	NA	Ortholog of A. nidulans FGSC A4 : AN6137, A. niger CBS 513.88 : An12g03990, Aspergillus wentii : Aspwe1_0176126, Aspergillus sydowii : Aspsy1_0058040 and Aspergillus terreus NIH2624 : ATET_09699
Small-scale	SNP	scf_000002_A_fumigatus_A1163	2201195	2201196	G->A	Y	AFUB_024560	2197393	2201225	NA	Ortholog of A. nidulans FGSC A4 : AN6137, A. niger CBS 513.88 : An12g03990, Aspergillus wentii : Aspwe1_0176126, Aspergillus sydowii : Aspsy1_0058040 and Aspergillus terreus NIH2624 : ATET_09699
Small-scale	SNP	scf_000002_A_fumigatus_A1163	2201536	2201537	A->G	Y	AFUB_024570	2201399	2207153	NA	Ortholog(s) have endoplasmic reticulum localization
Small-scale	SNP	scf_000002_A_fumigatus_A1163	2201965	2201966	T->C	Y	AFUB_024570	2201399	2207153	NA	Ortholog(s) have endoplasmic reticulum localization
Small-scale	SNP	scf_000002_A_fumigatus_A1163	2202504	2202505	T->C	Y	AFUB_024570	2201399	2207153	NA	Ortholog(s) have endoplasmic reticulum localization
Small-scale	SNP	scf_000002_A_fumigatus_A1163	2208057	2208058	A->C	Y	AFUB_024580	2207561	2211447	NA	Ortholog(s) have role in cation homeostasis
Small-scale	SNP	scf_000002_A_fumigatus_A1163	2210112	2210113	T->A	Y	AFUB_024580	2207561	2211447	NA	Ortholog(s) have role in cation homeostasis
Small-scale	SNP	scf_000002_A_fumigatus_A1163	2211210	2211211	C->T	Y	AFUB_024580	2207561	2211447	NA	Ortholog(s) have role in cation homeostasis
Small-scale	SNP	scf_000002_A_fumigatus_A1163	2213794	2213795	A->G	Y	AFUB_024590	2212111	2219264	NA	Ortholog(s) have acetyl-CoA carboxylase activity, biotin carboxylase activity and role in long-chain fatty acid biosynthetic process, protein import into nucleus
Small-scale	SNP	scf_000002_A_fumigatus_A1163	2218648	2218649	A->G	Y	AFUB_024590	2212111	2219264	NA	Ortholog(s) have acetyl-CoA carboxylase activity, biotin carboxylase activity and role in long-chain fatty acid biosynthetic process, protein import into nucleus
Small-scale	SNP	scf_000002_A_fumigatus_A1163	2235170	2235171	C->T	Y	AFUB_024680	2234985	2236965	NA	Ortholog of Neosartorya fischeri NRRL 181 : NFIA_084360, Aspergillus wentii : Aspwe1_0176138, Aspergillus fumigatus A1163 : AFUB_024680 and Aspergillus clavatus NRRL 1 : ACLA_080620
Small-scale	SNP	scf_000002_A_fumigatus_A1163	2239172	2239173	C->T	Y	AFUB_024690	2238107	2242518	NA	Has domain(s) with predicted ARF guanyl-nucleotide exchange factor activity, phospholipid binding activity and role in regulation of ARF protein signal transduction
Small-scale	SNP	scf_000002_A_fumigatus_A1163	2242214	2242215	A->G	Y	AFUB_024690	2238107	2242518	NA	Has domain(s) with predicted ARF guanyl-nucleotide exchange factor activity, phospholipid binding activity and role in regulation of ARF protein signal transduction
Small-scale	SNP	scf_000002_A_fumigatus_A1163	2246827	2246828	A->G	Y	AFUB_024700	2244691	2246852	NA	Putative zinc carboxypeptidase
Small-scale	SNP	scf_000002_A_fumigatus_A1163	2260662	2260663	G->A	Y	AFUB_024760	2258999	2263541	NA	Ortholog(s) have phospholipid-translocating ATPase activity
Small-scale	SNP	scf_000002_A_fumigatus_A1163	2271916	2271917	G->T	Y	AFUB_024810	2269059	2272582	NA	putative voltage-gated chloride channel
Small-scale	SNP	scf_000002_A_fumigatus_A1163	2275616	2275617	A->G	Y	AFUB_024820	2274657	2276400	NA	Has domain(s) with predicted role in transmembrane transport and integral component of membrane localization
Small-scale	SNP	scf_000002_A_fumigatus_A1163	2276088	2276089	T->C	Y	AFUB_024820	2274657	2276400	NA	Has domain(s) with predicted role in transmembrane transport and integral component of membrane localization
Small-scale	SNP	scf_000002_A_fumigatus_A1163	2276343	2276344	C->T	Y	AFUB_024820	2274657	2276400	NA	Has domain(s) with predicted role in transmembrane transport and integral component of membrane localization
Small-scale	SNP	scf_000002_A_fumigatus_A1163	2280043	2280044	T->C	Y	AFUB_024840	2278401	2280865	NA	Ortholog of A. nidulans FGSC A4 : AN6065, A. niger CBS 513.88 : An12g04650, A. oryzae RIB40 : AO090011000801, Aspergillus wentii : Aspwe1_0176156 and Aspergillus sydowii : Aspsy1_0031398
Small-scale	SNP	scf_000002_A_fumigatus_A1163	2280301	2280302	G->A	Y	AFUB_024840	2278401	2280865	NA	Ortholog of A. nidulans FGSC A4 : AN6065, A. niger CBS 513.88 : An12g04650, A. oryzae RIB40 : AO090011000801, Aspergillus wentii : Aspwe1_0176156 and Aspergillus sydowii : Aspsy1_0031398
Small-scale	SNP	scf_000002_A_fumigatus_A1163	2280304	2280305	G->T	Y	AFUB_024840	2278401	2280865	NA	Ortholog of A. nidulans FGSC A4 : AN6065, A. niger CBS 513.88 : An12g04650, A. oryzae RIB40 : AO090011000801, Aspergillus wentii : Aspwe1_0176156 and Aspergillus sydowii : Aspsy1_0031398
Small-scale	SNP	scf_000002_A_fumigatus_A1163	2281557	2281558	G->A	Y	AFUB_024850	2281050	2281839	NA	Putative isochorismatase family hydrolase
Small-scale	SNP	scf_000002_A_fumigatus_A1163	2282490	2282491	G->A	Y	AFUB_024860	2282044	2284046	NA	Ortholog(s) have cytosol localization
Small-scale	SNP	scf_000002_A_fumigatus_A1163	2284652	2284653	G->A	Y	AFUB_024870	2284559	2285292	NA	NA
Small-scale	SNP	scf_000002_A_fumigatus_A1163	2286253	2286254	T->C	Y	AFUB_024880	2285505	2286770	NA	Ortholog(s) have GDP-dissociation inhibitor activity, GTPase activator activity, translation initiation factor activity, translation initiation factor binding activity
Small-scale	SNP	scf_000002_A_fumigatus_A1163	2286719	2286720	C->T	Y	AFUB_024880	2285505	2286770	NA	Ortholog(s) have GDP-dissociation inhibitor activity, GTPase activator activity, translation initiation factor activity, translation initiation factor binding activity
Small-scale	SNP	scf_000002_A_fumigatus_A1163	2287304	2287305	A->G	Y	AFUB_024890	2287171	2291093	NA	protein of unknown function
Small-scale	SNP	scf_000002_A_fumigatus_A1163	2287650	2287651	C->G	Y	AFUB_024890	2287171	2291093	NA	protein of unknown function
Small-scale	SNP	scf_000002_A_fumigatus_A1163	2288263	2288264	A->G	Y	AFUB_024890	2287171	2291093	NA	protein of unknown function
Small-scale	SNP	scf_000002_A_fumigatus_A1163	2289673	2289674	A->C	Y	AFUB_024890	2287171	2291093	NA	protein of unknown function
Small-scale	SNP	scf_000002_A_fumigatus_A1163	2289959	2289960	C->T	Y	AFUB_024890	2287171	2291093	NA	protein of unknown function
Small-scale	SNP	scf_000002_A_fumigatus_A1163	2290852	2290853	G->A	Y	AFUB_024890	2287171	2291093	NA	protein of unknown function
Small-scale	SNP	scf_000002_A_fumigatus_A1163	2291934	2291935	T->C	Y	AFUB_024900	2291291	2294901	NA	Ortholog(s) have DNA ligase (ATP) activity, role in DNA ligation, DNA repair, Okazaki fragment processing involved in mitotic DNA replication and mitochondrion, nucleus localization
Small-scale	SNP	scf_000002_A_fumigatus_A1163	2293522	2293523	C->G	Y	AFUB_024900	2291291	2294901	NA	Ortholog(s) have DNA ligase (ATP) activity, role in DNA ligation, DNA repair, Okazaki fragment processing involved in mitotic DNA replication and mitochondrion, nucleus localization
Small-scale	SNP	scf_000002_A_fumigatus_A1163	2299937	2299938	T->G	Y	AFUB_024930	2298537	2301122	vtc4	Putative vacuolar transporter chaperone, phoB-regulated
Small-scale	SNP	scf_000002_A_fumigatus_A1163	2299973	2299974	A->G	Y	AFUB_024930	2298537	2301122	vtc4	Putative vacuolar transporter chaperone, phoB-regulated
Small-scale	SNP	scf_000002_A_fumigatus_A1163	2301038	2301039	G->A	Y	AFUB_024930	2298537	2301122	vtc4	Putative vacuolar transporter chaperone, phoB-regulated
Small-scale	SNP	scf_000002_A_fumigatus_A1163	2310389	2310390	T->A	Y	AFUB_024950	2306554	2310949	NA	DUF221 domain protein
Small-scale	SNP	scf_000002_A_fumigatus_A1163	2312625	2312626	T->G	Y	AFUB_024960	2311082	2312706	NA	Ortholog(s) have protein-arginine N5-methyltransferase activity, role in peptidyl-arginine methylation and cytosol, nucleus localization
Small-scale	SNP	scf_000002_A_fumigatus_A1163	2316473	2316474	C->T	Y	AFUB_024990	2316243	2319246	NA	Has domain(s) with predicted ammonia-lyase activity, role in L-phenylalanine catabolic process, biosynthetic process and cytoplasm localization
Small-scale	SNP	scf_000002_A_fumigatus_A1163	2316635	2316636	T->A	Y	AFUB_024990	2316243	2319246	NA	Has domain(s) with predicted ammonia-lyase activity, role in L-phenylalanine catabolic process, biosynthetic process and cytoplasm localization
Small-scale	SNP	scf_000002_A_fumigatus_A1163	2321442	2321443	T->C	Y	AFUB_025000	2319506	2326073	NA	Has domain(s) with predicted ATP binding, DNA binding, helicase activity, methyltransferase activity, nucleic acid binding, zinc ion binding activity and role in DNA methylation
Small-scale	SNP	scf_000002_A_fumigatus_A1163	2328635	2328636	A->G	Y	AFUB_025030	2328615	2330238	NA	Ortholog(s) have adenine deaminase activity, role in adenine catabolic process, hypoxanthine salvage and cytosol, nucleus localization
Small-scale	SNP	scf_000002_A_fumigatus_A1163	2330115	2330116	G->A	Y	AFUB_025030	2328615	2330238	NA	Ortholog(s) have adenine deaminase activity, role in adenine catabolic process, hypoxanthine salvage and cytosol, nucleus localization
Small-scale	SNP	scf_000002_A_fumigatus_A1163	2333618	2333619	A->C	Y	AFUB_025050	2332375	2335897	NA	Ortholog(s) have cytosol localization
Small-scale	SNP	scf_000002_A_fumigatus_A1163	2336066	2336067	A->G	Y	AFUB_025060	2336000	2337209	NA	Ortholog(s) have role in retrograde vesicle-mediated transport, Golgi to ER and COPI vesicle coat, cytosol, nucleus localization
Small-scale	SNP	scf_000002_A_fumigatus_A1163	2338280	2338281	C->G	Y	AFUB_025070	2337350	2340269	NA	Ortholog of A. nidulans FGSC A4 : AN6081, AN0849, A. fumigatus Af293 : Afu1g15080, A. niger CBS 513.88 : An01g13240, An12g04840 and A. oryzae RIB40 : AO090005001220, AO090011000776
Small-scale	SNP	scf_000002_A_fumigatus_A1163	2344801	2344802	G->C	Y	AFUB_025100	2344039	2345832	NA	protein of unknown function
Small-scale	SNP	scf_000002_A_fumigatus_A1163	2344923	2344924	C->T	Y	AFUB_025100	2344039	2345832	NA	protein of unknown function
Small-scale	SNP	scf_000002_A_fumigatus_A1163	2349336	2349337	T->C	Y	AFUB_025110	2347019	2349898	NA	Ortholog(s) have nucleolus localization
Small-scale	SNP	scf_000002_A_fumigatus_A1163	2351979	2351980	T->C	Y	AFUB_025120	2350013	2352148	NA	Ortholog(s) have role in SCF-dependent proteasomal ubiquitin-dependent protein catabolic process, cellular response to methylmercury and SCF ubiquitin ligase complex, cytosol localization
Small-scale	SNP	scf_000002_A_fumigatus_A1163	2353893	2353894	T->A	Y	AFUB_025130	2352281	2354329	NA	Ortholog(s) have metallochaperone activity, pyridoxal phosphate binding activity, role in manganese ion transport, pyridoxal phosphate transport and mitochondrion localization
Small-scale	SNP	scf_000002_A_fumigatus_A1163	2353926	2353927	T->C	Y	AFUB_025130	2352281	2354329	NA	Ortholog(s) have metallochaperone activity, pyridoxal phosphate binding activity, role in manganese ion transport, pyridoxal phosphate transport and mitochondrion localization
Small-scale	SNP	scf_000002_A_fumigatus_A1163	2355046	2355047	A->G	Y	AFUB_025140	2355036	2359045	NA	Has domain(s) with predicted metal ion transmembrane transporter activity, role in metal ion transport, transmembrane transport and membrane localization
Small-scale	SNP	scf_000002_A_fumigatus_A1163	2361400	2361401	T->C	Y	AFUB_025150	2359166	2361700	hsp60	Putative antigenic mitochondrial protein
Small-scale	SNP	scf_000002_A_fumigatus_A1163	2361401	2361402	T->C	Y	AFUB_025150	2359166	2361700	hsp60	Putative antigenic mitochondrial protein
Small-scale	SNP	scf_000002_A_fumigatus_A1163	2373718	2373719	T->C	Y	AFUB_025210	2372863	2376863	exg4	Ortholog(s) have glucan endo-1,6-beta-glucosidase activity and role in glucan catabolic process
Small-scale	SNP	scf_000002_A_fumigatus_A1163	2375775	2375776	C->T	Y	AFUB_025210	2372863	2376863	exg4	Ortholog(s) have glucan endo-1,6-beta-glucosidase activity and role in glucan catabolic process
Small-scale	SNP	scf_000002_A_fumigatus_A1163	2379280	2379281	G->A	Y	AFUB_025230	2378464	2380465	NA	Has domain(s) with predicted DNA binding, RNA polymerase II transcription factor activity, sequence-specific DNA binding, zinc ion binding activity and role in regulation of transcription, DNA-templated, transcription, DNA-templated
Small-scale	SNP	scf_000002_A_fumigatus_A1163	2381281	2381282	A->G	Y	AFUB_025240	2381057	2381604	NA	Has domain(s) with predicted oxidoreductase activity, acting on CH-OH group of donors activity and role in oxidation-reduction process
Small-scale	SNP	scf_000002_A_fumigatus_A1163	2387017	2387018	C->T	Y	AFUB_025260	2386105	2387910	chnB	Putative Baeyer-Villiger monooxygenase (BVMO)
Small-scale	SNP	scf_000002_A_fumigatus_A1163	2387220	2387221	G->A	Y	AFUB_025260	2386105	2387910	chnB	Putative Baeyer-Villiger monooxygenase (BVMO)
Small-scale	SNP	scf_000002_A_fumigatus_A1163	2388107	2388108	T->G	Y	AFUB_025270	2387970	2390319	NA	Ortholog of A. oryzae RIB40 : AO090010000111, Neosartorya fischeri NRRL 181 : NFIA_084910, Aspergillus fumigatus A1163 : AFUB_025270 and Aspergillus clavatus NRRL 1 : ACLA_081200
Small-scale	SNP	scf_000002_A_fumigatus_A1163	2393251	2393252	A->G	Y	AFUB_025290	2392875	2393497	NA	Ortholog of Aspergillus fumigatus A1163 : AFUB_025290
Small-scale	SNP	scf_000002_A_fumigatus_A1163	2395144	2395145	T->A	Y	AFUB_025320	2394947	2397347	NA	Putative carboxylic acid transport protein
Small-scale	SNP	scf_000002_A_fumigatus_A1163	2396672	2396673	G->A	Y	AFUB_025320	2394947	2397347	NA	Putative carboxylic acid transport protein
Small-scale	SNP	scf_000002_A_fumigatus_A1163	2396673	2396674	A->C	Y	AFUB_025320	2394947	2397347	NA	Putative carboxylic acid transport protein
Small-scale	SNP	scf_000002_A_fumigatus_A1163	2396723	2396724	A->G	Y	AFUB_025320	2394947	2397347	NA	Putative carboxylic acid transport protein
Small-scale	SNP	scf_000002_A_fumigatus_A1163	2396989	2396990	A->T	Y	AFUB_025320	2394947	2397347	NA	Putative carboxylic acid transport protein
Small-scale	SNP	scf_000002_A_fumigatus_A1163	2405182	2405183	T->C	Y	AFUB_025360	2405098	2411226	NA	Eukaryotic translation initiation factor subunit eIF-4F
Small-scale	SNP	scf_000002_A_fumigatus_A1163	2409102	2409103	A->G	Y	AFUB_025360	2405098	2411226	NA	Eukaryotic translation initiation factor subunit eIF-4F
Small-scale	SNP	scf_000002_A_fumigatus_A1163	2413681	2413682	C->T	Y	AFUB_025370	2411243	2414081	NA	Has domain(s) with predicted role in response to stress
Small-scale	SNP	scf_000002_A_fumigatus_A1163	2413716	2413717	G->A	Y	AFUB_025370	2411243	2414081	NA	Has domain(s) with predicted role in response to stress
Small-scale	SNP	scf_000002_A_fumigatus_A1163	2413717	2413718	G->A	Y	AFUB_025370	2411243	2414081	NA	Has domain(s) with predicted role in response to stress
Small-scale	SNP	scf_000002_A_fumigatus_A1163	2415670	2415671	C->G	Y	AFUB_025380	2414945	2416775	NA	protein of unknown function
Small-scale	SNP	scf_000002_A_fumigatus_A1163	2433321	2433322	T->C	Y	AFUB_025440	2432685	2435552	NA	Ortholog(s) have role in cell volume homeostasis, cellular calcium ion homeostasis, regulation of resting membrane potential and cortical endoplasmic reticulum localization
Small-scale	SNP	scf_000002_A_fumigatus_A1163	2433441	2433442	C->T	Y	AFUB_025440	2432685	2435552	NA	Ortholog(s) have role in cell volume homeostasis, cellular calcium ion homeostasis, regulation of resting membrane potential and cortical endoplasmic reticulum localization
Small-scale	SNP	scf_000002_A_fumigatus_A1163	2440347	2440348	A->G	Y	AFUB_025470	2440215	2441045	NA	Ortholog of A. oryzae RIB40 : AO090103000273, Aspergillus flavus NRRL 3357 : AFL2T_12118, Neosartorya fischeri NRRL 181 : NFIA_085090 and Aspergillus fumigatus A1163 : AFUB_025470
Small-scale	SNP	scf_000002_A_fumigatus_A1163	2463320	2463321	T->C	Y	AFUB_025550	2463057	2464013	NA	Ortholog(s) have superoxide dismutase copper chaperone activity, role in cellular copper ion homeostasis, cellular response to metal ion, intracellular copper ion transport and cytosol, mitochondrial inner membrane, nucleus localization
Small-scale	SNP	scf_000002_A_fumigatus_A1163	2464688	2464689	G->A	Y	AFUB_025560	2464217	2466342	npkA	Putative protein kinase
Small-scale	SNP	scf_000002_A_fumigatus_A1163	2467871	2467872	G->T	Y	AFUB_025570	2466344	2468378	NA	Ortholog of A. niger CBS 513.88 : An16g05500, Neosartorya fischeri NRRL 181 : NFIA_085180, Aspergillus wentii : Aspwe1_0682039 and Aspergillus versicolor : Aspve1_0040894
Small-scale	SNP	scf_000002_A_fumigatus_A1163	2477517	2477518	T->C	Y	AFUB_025630	2476056	2478651	NA	Putative glucose-6-phosphate isomerase
Small-scale	SNP	scf_000002_A_fumigatus_A1163	2480827	2480828	T->C	Y	AFUB_025640	2479587	2482307	NA	Ortholog(s) have U1 snRNP, cytosol localization
Small-scale	SNP	scf_000002_A_fumigatus_A1163	2488772	2488773	T->G	Y	AFUB_025670	2486823	2488843	NA	Ortholog(s) have GTPase activator activity and role in COPI coating of Golgi vesicle, ER to Golgi vesicle-mediated transport, retrograde vesicle-mediated transport, Golgi to ER
Small-scale	SNP	scf_000002_A_fumigatus_A1163	2490212	2490213	A->G	Y	AFUB_025680	2488844	2491016	NA	Ortholog(s) have 2-amino-4-hydroxy-6-hydroxymethyldihydropteridine diphosphokinase activity, dihydroneopterin aldolase activity, dihydropteroate synthase activity and role in tetrahydrofolate biosynthetic process
Small-scale	SNP	scf_000002_A_fumigatus_A1163	2499154	2499155	G->A	Y	AFUB_025710	2498379	2499837	tif35	Eukaryotic translation initiation factor 3 subunit G
Small-scale	SNP	scf_000002_A_fumigatus_A1163	2499493	2499494	T->C	Y	AFUB_025710	2498379	2499837	tif35	Eukaryotic translation initiation factor 3 subunit G
Small-scale	SNP	scf_000002_A_fumigatus_A1163	2505041	2505042	A->G	Y	AFUB_025730	2504641	2510659	NA	Has domain(s) with predicted DNA binding activity
Small-scale	SNP	scf_000002_A_fumigatus_A1163	2506341	2506342	C->T	Y	AFUB_025730	2504641	2510659	NA	Has domain(s) with predicted DNA binding activity
Small-scale	SNP	scf_000002_A_fumigatus_A1163	2507262	2507263	G->A	Y	AFUB_025730	2504641	2510659	NA	Has domain(s) with predicted DNA binding activity
Small-scale	SNP	scf_000002_A_fumigatus_A1163	2511748	2511749	T->C	Y	AFUB_025740	2511438	2513317	NA	Ortholog of Aspergillus fumigatus A1163 : AFUB_025740
Small-scale	SNP	scf_000002_A_fumigatus_A1163	2511934	2511935	C->T	Y	AFUB_025740	2511438	2513317	NA	Ortholog of Aspergillus fumigatus A1163 : AFUB_025740
Small-scale	SNP	scf_000002_A_fumigatus_A1163	2514336	2514337	T->C	Y	AFUB_025750	2513412	2515741	faa4	Putative long chain fatty acid CoA ligase
Small-scale	SNP	scf_000002_A_fumigatus_A1163	2517401	2517402	T->G	Y	AFUB_025770	2516931	2518358	NA	Ortholog(s) have S-adenosylmethionine-dependent methyltransferase activity and role in protein methylation
Small-scale	SNP	scf_000002_A_fumigatus_A1163	2526774	2526775	T->C	Y	AFUB_025800	2526404	2529260	ssc70	Putative mitochondrial Hsp70 chaperone
Small-scale	SNP	scf_000002_A_fumigatus_A1163	2530906	2530907	C->T	Y	AFUB_025810	2530627	2534018	NA	Ortholog(s) have cytosol, nucleus localization
Small-scale	SNP	scf_000002_A_fumigatus_A1163	2533433	2533434	A->G	Y	AFUB_025810	2530627	2534018	NA	Ortholog(s) have cytosol, nucleus localization
Small-scale	SNP	scf_000002_A_fumigatus_A1163	2533618	2533619	T->C	Y	AFUB_025810	2530627	2534018	NA	Ortholog(s) have cytosol, nucleus localization
Small-scale	SNP	scf_000002_A_fumigatus_A1163	2535995	2535996	T->C	Y	AFUB_025820	2534479	2538645	NA	Ortholog(s) have cytosol localization
Small-scale	SNP	scf_000002_A_fumigatus_A1163	2539606	2539607	T->C	Y	AFUB_025830	2539272	2542919	NA	Ortholog(s) have cytosol, nuclear envelope localization
Small-scale	SNP	scf_000002_A_fumigatus_A1163	2539830	2539831	T->C	Y	AFUB_025830	2539272	2542919	NA	Ortholog(s) have cytosol, nuclear envelope localization
Small-scale	SNP	scf_000002_A_fumigatus_A1163	2562490	2562491	C->T	Y	AFUB_025920	2560936	2562768	NA	Ortholog of A. nidulans FGSC A4 : AN5995, A. niger CBS 513.88 : An16g04920, A. oryzae RIB40 : AO090011000625, Aspergillus wentii : Aspwe1_0045120 and Aspergillus sydowii : Aspsy1_0031289
Small-scale	SNP	scf_000002_A_fumigatus_A1163	2566250	2566251	A->G	Y	AFUB_025950	2566024	2569061	NA	Ortholog(s) have ATP-dependent 3'-5' DNA helicase activity, single-stranded DNA binding, single-stranded DNA-dependent ATP-dependent DNA helicase activity and MCM complex, MCM core complex, nuclear chromatin localization
Small-scale	SNP	scf_000002_A_fumigatus_A1163	2566320	2566321	T->G	Y	AFUB_025950	2566024	2569061	NA	Ortholog(s) have ATP-dependent 3'-5' DNA helicase activity, single-stranded DNA binding, single-stranded DNA-dependent ATP-dependent DNA helicase activity and MCM complex, MCM core complex, nuclear chromatin localization
Small-scale	SNP	scf_000002_A_fumigatus_A1163	2571827	2571828	A->G	Y	AFUB_025960	2569223	2573471	pex1	Putative peroxisome biosynthesis protein
Small-scale	SNP	scf_000002_A_fumigatus_A1163	2572720	2572721	G->A	Y	AFUB_025960	2569223	2573471	pex1	Putative peroxisome biosynthesis protein
Small-scale	SNP	scf_000002_A_fumigatus_A1163	2573370	2573371	G->C	Y	AFUB_025960	2569223	2573471	pex1	Putative peroxisome biosynthesis protein
Small-scale	SNP	scf_000002_A_fumigatus_A1163	2586810	2586811	A->C	Y	AFUB_026010	2586181	2588610	NA	Ortholog of A. niger CBS 513.88 : An16g04780, A. oryzae RIB40 : AO090011000615, Neosartorya fischeri NRRL 181 : NFIA_085600 and Aspergillus wentii : Aspwe1_0045132
Small-scale	SNP	scf_000002_A_fumigatus_A1163	2613638	2613639	G->A	Y	AFUB_026120	2613107	2614087	NA	Ortholog of A. nidulans FGSC A4 : AN5980, A. niger CBS 513.88 : An16g04680, A. oryzae RIB40 : AO090011000607, Aspergillus wentii : Aspwe1_0116525 and Aspergillus sydowii : Aspsy1_0045000
Small-scale	SNP	scf_000002_A_fumigatus_A1163	2615598	2615599	A->G	Y	AFUB_026130	2614491	2619136	NA	Ortholog of A. nidulans FGSC A4 : AN5981, A. niger CBS 513.88 : An16g04670, A. oryzae RIB40 : AO090011000606, Aspergillus wentii : Aspwe1_0186299 and Aspergillus sydowii : Aspsy1_0057885
Small-scale	SNP	scf_000002_A_fumigatus_A1163	2625519	2625520	G->A	Y	AFUB_026170	2625368	2627027	NA	Ortholog(s) have kynureninase activity, role in 'de novo' NAD biosynthetic process from tryptophan and cytoplasm, nucleus localization
Small-scale	SNP	scf_000002_A_fumigatus_A1163	2642976	2642977	G->C	Y	AFUB_026220	2642230	2644177	NA	Has domain(s) with predicted catalytic activity and role in metabolic process
Small-scale	SNP	scf_000002_A_fumigatus_A1163	2683124	2683125	G->A	Y	AFUB_026350	2682804	2685032	NA	Ortholog(s) have fungal-type vacuole localization
Small-scale	SNP	scf_000002_A_fumigatus_A1163	2684284	2684285	C->G	Y	AFUB_026350	2682804	2685032	NA	Ortholog(s) have fungal-type vacuole localization
Small-scale	SNP	scf_000002_A_fumigatus_A1163	2690987	2690988	T->C	Y	AFUB_026380	2690399	2691680	NA	Putative NADH dehydrogenase
Small-scale	SNP	scf_000002_A_fumigatus_A1163	2693529	2693530	T->C	Y	AFUB_026390	2692004	2695419	NA	Ortholog(s) have ubiquitin binding activity
Small-scale	SNP	scf_000002_A_fumigatus_A1163	2694028	2694029	C->T	Y	AFUB_026390	2692004	2695419	NA	Ortholog(s) have ubiquitin binding activity
Small-scale	SNP	scf_000002_A_fumigatus_A1163	2696752	2696753	G->A	Y	AFUB_026400	2695527	2699201	NA	Ortholog(s) have protein serine/threonine kinase activity, protein serine/threonine kinase inhibitor activity
Small-scale	SNP	scf_000002_A_fumigatus_A1163	2702988	2702989	T->A	Y	AFUB_026430	2701758	2702991	NA	Has domain(s) with predicted catalytic activity and role in metabolic process
Small-scale	SNP	scf_000002_A_fumigatus_A1163	2703568	2703569	A->G	Y	AFUB_026440	2703325	2704491	mpdA	Putative mannitol-1-phosphate dehydrogenase
Small-scale	SNP	scf_000002_A_fumigatus_A1163	2707095	2707096	A->T	Y	AFUB_026450	2705958	2707420	NA	Has domain(s) with predicted plasma membrane localization
Small-scale	SNP	scf_000002_A_fumigatus_A1163	2713966	2713967	A->G	Y	AFUB_026470	2711824	2714740	NA	Putative MFS phosphate transporter
Small-scale	SNP	scf_000002_A_fumigatus_A1163	2721122	2721123	G->C	Y	AFUB_026510	2720690	2725549	NA	Ortholog(s) have DNA replication origin binding, DNA-directed DNA polymerase activity, chromatin binding, single-stranded DNA binding activity
Small-scale	SNP	scf_000002_A_fumigatus_A1163	2722074	2722075	T->C	Y	AFUB_026510	2720690	2725549	NA	Ortholog(s) have DNA replication origin binding, DNA-directed DNA polymerase activity, chromatin binding, single-stranded DNA binding activity
Small-scale	SNP	scf_000002_A_fumigatus_A1163	2723391	2723392	A->T	Y	AFUB_026510	2720690	2725549	NA	Ortholog(s) have DNA replication origin binding, DNA-directed DNA polymerase activity, chromatin binding, single-stranded DNA binding activity
Small-scale	SNP	scf_000002_A_fumigatus_A1163	2725338	2725339	G->A	Y	AFUB_026510	2720690	2725549	NA	Ortholog(s) have DNA replication origin binding, DNA-directed DNA polymerase activity, chromatin binding, single-stranded DNA binding activity
Small-scale	SNP	scf_000002_A_fumigatus_A1163	2727209	2727210	A->T	Y	AFUB_026520	2725945	2728107	NA	Ortholog(s) have role in thiamine biosynthetic process and cytosol localization
Small-scale	SNP	scf_000002_A_fumigatus_A1163	2727361	2727362	T->C	Y	AFUB_026520	2725945	2728107	NA	Ortholog(s) have role in thiamine biosynthetic process and cytosol localization
Small-scale	SNP	scf_000002_A_fumigatus_A1163	2730031	2730032	G->A	Y	AFUB_026530	2729493	2732690	NA	Putative RNA helicase
Small-scale	SNP	scf_000002_A_fumigatus_A1163	2734168	2734169	A->G	Y	AFUB_026540	2733026	2734899	NA	Has domain(s) with predicted hydrolase activity, hydrolase activity, acting on ester bonds activity and role in lipid metabolic process
Small-scale	SNP	scf_000002_A_fumigatus_A1163	2734514	2734515	T->A	Y	AFUB_026540	2733026	2734899	NA	Has domain(s) with predicted hydrolase activity, hydrolase activity, acting on ester bonds activity and role in lipid metabolic process
Small-scale	SNP	scf_000002_A_fumigatus_A1163	2745191	2745192	C->T	Y	AFUB_026550	2740424	2745356	NA	putative transcription factor
Small-scale	SNP	scf_000002_A_fumigatus_A1163	2746222	2746223	T->G	Y	AFUB_026560	2745855	2746304	NA	Ortholog of Aspergillus fumigatus A1163 : AFUB_026560
Small-scale	SNP	scf_000002_A_fumigatus_A1163	2747386	2747387	A->C	Y	AFUB_026570	2746362	2748766	NA	Ortholog of A. nidulans FGSC A4 : AN5927, A. oryzae RIB40 : AO090011000964, Aspergillus wentii : Aspwe1_0117218, Aspergillus sydowii : Aspsy1_0132184 and Aspergillus terreus NIH2624 : ATET_01498
Small-scale	SNP	scf_000002_A_fumigatus_A1163	2749420	2749421	A->G	Y	AFUB_026580	2749094	2750875	NA	Ortholog(s) have endoplasmic reticulum localization
Small-scale	SNP	scf_000002_A_fumigatus_A1163	2749551	2749552	C->T	Y	AFUB_026580	2749094	2750875	NA	Ortholog(s) have endoplasmic reticulum localization
Small-scale	SNP	scf_000002_A_fumigatus_A1163	2755299	2755300	C->T	Y	AFUB_026600	2753721	2757696	NA	Ortholog(s) have ATP-dependent 3'-5' DNA helicase activity, bubble DNA binding activity
Small-scale	SNP	scf_000002_A_fumigatus_A1163	2758069	2758070	T->G	Y	AFUB_026610	2757777	2759331	NA	Ortholog of Aspergillus fumigatus A1163 : AFUB_026610
Small-scale	SNP	scf_000002_A_fumigatus_A1163	2759274	2759275	C->T	Y	AFUB_026610	2757777	2759331	NA	Ortholog of Aspergillus fumigatus A1163 : AFUB_026610
Small-scale	SNP	scf_000002_A_fumigatus_A1163	2760985	2760986	G->A	Y	AFUB_026620	2760268	2761913	NA	Has domain(s) with predicted role in response to stress and integral component of membrane localization
Small-scale	SNP	scf_000002_A_fumigatus_A1163	2760986	2760987	A->G	Y	AFUB_026620	2760268	2761913	NA	Has domain(s) with predicted role in response to stress and integral component of membrane localization
Small-scale	SNP	scf_000002_A_fumigatus_A1163	2770870	2770871	T->C	Y	AFUB_026640	2770477	2772295	NA	Ortholog(s) have role in adenine biosynthetic process
Small-scale	SNP	scf_000002_A_fumigatus_A1163	2771029	2771030	T->C	Y	AFUB_026640	2770477	2772295	NA	Ortholog(s) have role in adenine biosynthetic process
Small-scale	SNP	scf_000002_A_fumigatus_A1163	2773532	2773533	G->A	Y	AFUB_026650	2772411	2776384	NA	Has domain(s) with predicted zinc ion binding activity
Small-scale	SNP	scf_000002_A_fumigatus_A1163	2776321	2776322	T->G	Y	AFUB_026650	2772411	2776384	NA	Has domain(s) with predicted zinc ion binding activity
Small-scale	SNP	scf_000002_A_fumigatus_A1163	2781546	2781547	A->G	Y	AFUB_026680	2780622	2783161	NA	Ortholog(s) have cytosol localization
Small-scale	SNP	scf_000002_A_fumigatus_A1163	2798986	2798987	A->G	Y	AFUB_026750	2798959	2800469	NA	Ortholog(s) have GTPase activity, role in Golgi to plasma membrane protein transport, cellular response to drug, endocytosis, protein targeting to vacuole and cytosol, trans-Golgi network localization
Small-scale	SNP	scf_000002_A_fumigatus_A1163	2799033	2799034	C->T	Y	AFUB_026750	2798959	2800469	NA	Ortholog(s) have GTPase activity, role in Golgi to plasma membrane protein transport, cellular response to drug, endocytosis, protein targeting to vacuole and cytosol, trans-Golgi network localization
Small-scale	SNP	scf_000002_A_fumigatus_A1163	2799249	2799250	C->T	Y	AFUB_026750	2798959	2800469	NA	Ortholog(s) have GTPase activity, role in Golgi to plasma membrane protein transport, cellular response to drug, endocytosis, protein targeting to vacuole and cytosol, trans-Golgi network localization
Small-scale	SNP	scf_000002_A_fumigatus_A1163	2799334	2799335	A->T	Y	AFUB_026750	2798959	2800469	NA	Ortholog(s) have GTPase activity, role in Golgi to plasma membrane protein transport, cellular response to drug, endocytosis, protein targeting to vacuole and cytosol, trans-Golgi network localization
Small-scale	SNP	scf_000002_A_fumigatus_A1163	2800266	2800267	C->G	Y	AFUB_026750	2798959	2800469	NA	Ortholog(s) have GTPase activity, role in Golgi to plasma membrane protein transport, cellular response to drug, endocytosis, protein targeting to vacuole and cytosol, trans-Golgi network localization
Small-scale	SNP	scf_000002_A_fumigatus_A1163	2806692	2806693	C->T	Y	AFUB_026780	2805893	2807851	NA	Ortholog(s) have dihydroorotate dehydrogenase activity, orotate reductase (NADH) activity, role in 'de novo' pyrimidine nucleobase biosynthetic process and mitochondrial membrane localization
Small-scale	SNP	scf_000002_A_fumigatus_A1163	2814649	2814650	A->G	Y	AFUB_026830	2814564	2816671	NA	Ortholog(s) have nucleus localization
Small-scale	SNP	scf_000002_A_fumigatus_A1163	2815090	2815091	G->A	Y	AFUB_026830	2814564	2816671	NA	Ortholog(s) have nucleus localization
Small-scale	SNP	scf_000002_A_fumigatus_A1163	2815492	2815493	C->A	Y	AFUB_026830	2814564	2816671	NA	Ortholog(s) have nucleus localization
Small-scale	SNP	scf_000002_A_fumigatus_A1163	2816514	2816515	A->G	Y	AFUB_026830	2814564	2816671	NA	Ortholog(s) have nucleus localization
Small-scale	SNP	scf_000002_A_fumigatus_A1163	2817609	2817610	G->A	Y	AFUB_026840	2816846	2818965	NA	Ortholog(s) have endoplasmic reticulum localization
Small-scale	SNP	scf_000002_A_fumigatus_A1163	2822932	2822933	G->A	Y	AFUB_026870	2821987	2825863	NA	Ortholog(s) have ATPase activity, DNA/DNA annealing activity and role in mitotic chromosome condensation
Small-scale	SNP	scf_000002_A_fumigatus_A1163	2823537	2823538	C->T	Y	AFUB_026870	2821987	2825863	NA	Ortholog(s) have ATPase activity, DNA/DNA annealing activity and role in mitotic chromosome condensation
Small-scale	SNP	scf_000002_A_fumigatus_A1163	2824650	2824651	C->G	Y	AFUB_026870	2821987	2825863	NA	Ortholog(s) have ATPase activity, DNA/DNA annealing activity and role in mitotic chromosome condensation
Small-scale	SNP	scf_000002_A_fumigatus_A1163	2825239	2825240	C->G	Y	AFUB_026870	2821987	2825863	NA	Ortholog(s) have ATPase activity, DNA/DNA annealing activity and role in mitotic chromosome condensation
Small-scale	SNP	scf_000002_A_fumigatus_A1163	2825296	2825297	G->A	Y	AFUB_026870	2821987	2825863	NA	Ortholog(s) have ATPase activity, DNA/DNA annealing activity and role in mitotic chromosome condensation
Small-scale	SNP	scf_000002_A_fumigatus_A1163	2825449	2825450	C->T	Y	AFUB_026870	2821987	2825863	NA	Ortholog(s) have ATPase activity, DNA/DNA annealing activity and role in mitotic chromosome condensation
Small-scale	SNP	scf_000002_A_fumigatus_A1163	2827644	2827645	A->G	Y	AFUB_026880	2826900	2827949	NA	Has domain(s) with predicted methyltransferase activity
Small-scale	SNP	scf_000002_A_fumigatus_A1163	2829321	2829322	C->T	Y	AFUB_026890	2828299	2830383	NA	Has domain(s) with predicted role in regulation of transcription, DNA-templated and nucleus localization
Small-scale	SNP	scf_000002_A_fumigatus_A1163	2833799	2833800	A->G	Y	AFUB_026910	2832741	2834752	NA	Putative secretory-pathway GDP dissociation inhibitor
Small-scale	SNP	scf_000002_A_fumigatus_A1163	2835928	2835929	C->A	Y	AFUB_026929	2835171	2836119	NA	Ortholog of A. niger CBS 513.88 : An02g03130, Neosartorya fischeri NRRL 181 : NFIA_086450, Aspergillus wentii : Aspwe1_0175462 and Aspergillus versicolor : Aspve1_0027796
Small-scale	SNP	scf_000002_A_fumigatus_A1163	2849576	2849577	C->T	Y	AFUB_026940	2848698	2851171	flbA	Developmental regulator
Small-scale	SNP	scf_000002_A_fumigatus_A1163	2850016	2850017	C->G	Y	AFUB_026940	2848698	2851171	flbA	Developmental regulator
Small-scale	SNP	scf_000002_A_fumigatus_A1163	2858891	2858892	T->C	Y	AFUB_026970	2856081	2861861	NA	Ortholog of A. nidulans FGSC A4 : AN5891, A. niger CBS 513.88 : An02g03210, A. oryzae RIB40 : AO090026000529, Neosartorya fischeri NRRL 181 : NFIA_086490 and Aspergillus clavatus NRRL 1 : ACLA_070170
Small-scale	SNP	scf_000002_A_fumigatus_A1163	2859341	2859342	T->C	Y	AFUB_026970	2856081	2861861	NA	Ortholog of A. nidulans FGSC A4 : AN5891, A. niger CBS 513.88 : An02g03210, A. oryzae RIB40 : AO090026000529, Neosartorya fischeri NRRL 181 : NFIA_086490 and Aspergillus clavatus NRRL 1 : ACLA_070170
Small-scale	SNP	scf_000002_A_fumigatus_A1163	2859488	2859489	C->T	Y	AFUB_026970	2856081	2861861	NA	Ortholog of A. nidulans FGSC A4 : AN5891, A. niger CBS 513.88 : An02g03210, A. oryzae RIB40 : AO090026000529, Neosartorya fischeri NRRL 181 : NFIA_086490 and Aspergillus clavatus NRRL 1 : ACLA_070170
Small-scale	SNP	scf_000002_A_fumigatus_A1163	2864202	2864203	T->C	Y	AFUB_026980	2862639	2864330	NA	Has domain(s) with predicted role in transmembrane transport and membrane localization
Small-scale	SNP	scf_000002_A_fumigatus_A1163	2871181	2871182	T->C	Y	AFUB_027020	2870643	2873639	luA	Putative 3-isopropylmalate dehydratase with a predicted role in nitrogen metabolism
Small-scale	SNP	scf_000002_A_fumigatus_A1163	2874116	2874117	G->T	Y	AFUB_027030	2874056	2881706	ags2	Putative alpha(1-3) glucan synthase
Small-scale	SNP	scf_000002_A_fumigatus_A1163	2880538	2880539	A->C	Y	AFUB_027030	2874056	2881706	ags2	Putative alpha(1-3) glucan synthase
Small-scale	SNP	scf_000002_A_fumigatus_A1163	2882054	2882055	C->T	Y	AFUB_027040	2881888	2882619	NA	Ortholog of Aspergillus fumigatus A1163 : AFUB_027040
Small-scale	SNP	scf_000002_A_fumigatus_A1163	2889934	2889935	T->A	Y	AFUB_027060	2888351	2891007	NA	Ortholog(s) have methylenetetrahydrofolate reductase (NAD(P)H) activity, role in methionine biosynthetic process, one-carbon metabolic process and mitochondrion localization
Small-scale	SNP	scf_000002_A_fumigatus_A1163	2903016	2903017	C->T	Y	AFUB_027120	2902171	2904732	NA	Has domain(s) with predicted catalytic activity and role in metabolic process
Small-scale	SNP	scf_000002_A_fumigatus_A1163	2903216	2903217	C->T	Y	AFUB_027120	2902171	2904732	NA	Has domain(s) with predicted catalytic activity and role in metabolic process
Small-scale	SNP	scf_000002_A_fumigatus_A1163	2905527	2905528	C->T	Y	AFUB_027130	2905091	2906964	NA	Ortholog of A. nidulans FGSC A4 : AN5876, AN2876, A. fumigatus Af293 : Afu3g11770, Aspergillus wentii : Aspwe1_0653753 and Aspergillus sydowii : Aspsy1_0146596, Aspsy1_1176317
Small-scale	SNP	scf_000002_A_fumigatus_A1163	2908197	2908198	G->A	Y	AFUB_027140	2907257	2908510	NA	Ortholog(s) have role in endonucleolytic cleavage in ITS1 to separate SSU-rRNA from 5.8S rRNA and LSU-rRNA from tricistronic rRNA transcript (SSU-rRNA, 5.8S rRNA, LSU-rRNA)
Small-scale	SNP	scf_000002_A_fumigatus_A1163	2919307	2919308	T->C	Y	AFUB_027170	2918643	2922203	NA	Ortholog(s) have gamma-tubulin binding activity and role in cytoplasmic microtubule organization, establishment or maintenance of cell polarity regulating cell shape, microtubule anchoring at spindle pole body, mitotic spindle assembly
Small-scale	SNP	scf_000002_A_fumigatus_A1163	2920799	2920800	G->A	Y	AFUB_027170	2918643	2922203	NA	Ortholog(s) have gamma-tubulin binding activity and role in cytoplasmic microtubule organization, establishment or maintenance of cell polarity regulating cell shape, microtubule anchoring at spindle pole body, mitotic spindle assembly
Small-scale	SNP	scf_000002_A_fumigatus_A1163	2921399	2921400	T->A	Y	AFUB_027170	2918643	2922203	NA	Ortholog(s) have gamma-tubulin binding activity and role in cytoplasmic microtubule organization, establishment or maintenance of cell polarity regulating cell shape, microtubule anchoring at spindle pole body, mitotic spindle assembly
Small-scale	SNP	scf_000002_A_fumigatus_A1163	2921489	2921490	G->A	Y	AFUB_027170	2918643	2922203	NA	Ortholog(s) have gamma-tubulin binding activity and role in cytoplasmic microtubule organization, establishment or maintenance of cell polarity regulating cell shape, microtubule anchoring at spindle pole body, mitotic spindle assembly
Small-scale	SNP	scf_000002_A_fumigatus_A1163	2924807	2924808	T->G	Y	AFUB_027190	2923846	2925420	NA	Has domain(s) with predicted methyltransferase activity
Small-scale	SNP	scf_000002_A_fumigatus_A1163	2925277	2925278	T->G	Y	AFUB_027190	2923846	2925420	NA	Has domain(s) with predicted methyltransferase activity
Small-scale	SNP	scf_000002_A_fumigatus_A1163	2939658	2939659	C->T	Y	AFUB_027240	2939563	2942166	NA	Ortholog(s) have acetyl-CoA:L-glutamate N-acetyltransferase activity, role in ornithine biosynthetic process and mitochondrial matrix, mitochondrial membrane localization
Small-scale	SNP	scf_000002_A_fumigatus_A1163	2956963	2956964	A->G	Y	AFUB_027320	2956315	2958279	NA	F-box domain protein
Small-scale	SNP	scf_000002_A_fumigatus_A1163	2960515	2960516	G->A	Y	AFUB_027330	2959896	2961770	NA	Has domain(s) with predicted role in transmembrane transport and integral component of membrane localization
Small-scale	SNP	scf_000002_A_fumigatus_A1163	2963415	2963416	A->T	Y	AFUB_027340	2963139	2964838	NA	Has domain(s) with predicted transferase activity, transferring hexosyl groups activity and role in metabolic process
Small-scale	SNP	scf_000002_A_fumigatus_A1163	2964113	2964114	C->A	Y	AFUB_027340	2963139	2964838	NA	Has domain(s) with predicted transferase activity, transferring hexosyl groups activity and role in metabolic process
Small-scale	SNP	scf_000002_A_fumigatus_A1163	2968681	2968682	C->T	Y	AFUB_027360	2966621	2969032	NA	Has domain(s) with predicted catalytic activity, cation binding activity and role in carbohydrate metabolic process
Small-scale	SNP	scf_000002_A_fumigatus_A1163	2970737	2970738	A->G	Y	AFUB_027370	2969362	2971702	NA	Has domain(s) with predicted catalytic activity, cation binding activity and role in carbohydrate metabolic process
Small-scale	SNP	scf_000002_A_fumigatus_A1163	2973108	2973109	A->T	Y	AFUB_027390	2972995	2973303	NA	Ortholog of Aspergillus fumigatus A1163 : AFUB_027390
Small-scale	SNP	scf_000002_A_fumigatus_A1163	2988381	2988382	C->T	Y	AFUB_027480	2988096	2990801	NA	Has domain(s) with predicted ATP binding, protein kinase activity, protein tyrosine kinase activity and role in protein phosphorylation
Small-scale	SNP	scf_000002_A_fumigatus_A1163	2993848	2993849	A->G	Y	AFUB_027490	2992799	2996982	NA	Ortholog(s) have ATP-dependent peptidase activity, role in chaperone-mediated protein complex assembly, misfolded or incompletely synthesized protein catabolic process and mitochondrial matrix localization
Small-scale	SNP	scf_000002_A_fumigatus_A1163	2994323	2994324	T->C	Y	AFUB_027490	2992799	2996982	NA	Ortholog(s) have ATP-dependent peptidase activity, role in chaperone-mediated protein complex assembly, misfolded or incompletely synthesized protein catabolic process and mitochondrial matrix localization
Small-scale	SNP	scf_000002_A_fumigatus_A1163	2996866	2996867	A->G	Y	AFUB_027490	2992799	2996982	NA	Ortholog(s) have ATP-dependent peptidase activity, role in chaperone-mediated protein complex assembly, misfolded or incompletely synthesized protein catabolic process and mitochondrial matrix localization
Small-scale	SNP	scf_000002_A_fumigatus_A1163	3022116	3022117	G->A	Y	AFUB_027560	3020846	3025197	NA	Ortholog(s) have mRNA binding activity and 90S preribosome, cytoplasm, mitotic spindle pole body, nucleolus localization
Small-scale	SNP	scf_000002_A_fumigatus_A1163	3035505	3035506	A->T	Y	AFUB_027580	3035034	3039252	cyc8	Transcriptional corepressor
Small-scale	SNP	scf_000002_A_fumigatus_A1163	3037382	3037383	C->T	Y	AFUB_027580	3035034	3039252	cyc8	Transcriptional corepressor
Small-scale	SNP	scf_000002_A_fumigatus_A1163	3041225	3041226	T->G	Y	AFUB_027590	3039514	3041329	rpL3	Allergenic ribosomal L3 protein
Small-scale	SNP	scf_000002_A_fumigatus_A1163	3047067	3047068	A->C	Y	AFUB_027610	3044446	3047703	kre6	Putative cell wall biosynthesis protein
Small-scale	SNP	scf_000002_A_fumigatus_A1163	3047598	3047599	A->G	Y	AFUB_027610	3044446	3047703	kre6	Putative cell wall biosynthesis protein
Small-scale	SNP	scf_000002_A_fumigatus_A1163	3048526	3048527	C->A	Y	AFUB_027620	3048317	3049209	NA	protein of unknown function
Small-scale	SNP	scf_000002_A_fumigatus_A1163	3051257	3051258	G->T	Y	AFUB_027640	3050117	3052192	NA	Putative pyruvate dehydrogenase kinase
Small-scale	SNP	scf_000002_A_fumigatus_A1163	3052010	3052011	G->A	Y	AFUB_027640	3050117	3052192	NA	Putative pyruvate dehydrogenase kinase
Small-scale	SNP	scf_000002_A_fumigatus_A1163	3060508	3060509	G->A	Y	AFUB_027680	3060034	3062053	NA	Ortholog(s) have GTP-Rho binding, phosphatidylinositol-4,5-bisphosphate binding activity and role in Golgi to plasma membrane transport, Rho protein signal transduction, exocyst assembly, exocyst localization
Small-scale	SNP	scf_000002_A_fumigatus_A1163	3061339	3061340	A->G	Y	AFUB_027680	3060034	3062053	NA	Ortholog(s) have GTP-Rho binding, phosphatidylinositol-4,5-bisphosphate binding activity and role in Golgi to plasma membrane transport, Rho protein signal transduction, exocyst assembly, exocyst localization
Small-scale	SNP	scf_000002_A_fumigatus_A1163	3063837	3063838	T->C	Y	AFUB_027690	3062582	3065110	NA	Ortholog(s) have calcium-dependent phospholipase A2 activity, role in phospholipid metabolic process and mitochondrial intermembrane space localization
Small-scale	SNP	scf_000002_A_fumigatus_A1163	3070180	3070181	T->C	Y	AFUB_027720	3069662	3072064	NA	Ortholog(s) have extracellular region localization
Small-scale	SNP	scf_000002_A_fumigatus_A1163	3070594	3070595	C->T	Y	AFUB_027720	3069662	3072064	NA	Ortholog(s) have extracellular region localization
Small-scale	SNP	scf_000002_A_fumigatus_A1163	3072457	3072458	G->A	Y	AFUB_027730	3072173	3073108	NA	Ortholog(s) have cytosol, nucleus localization
Small-scale	SNP	scf_000002_A_fumigatus_A1163	3079642	3079643	G->A	Y	AFUB_027750	3077961	3080104	NA	Ortholog(s) have manganese ion transmembrane transporter activity, role in cellular manganese ion homeostasis and Golgi membrane, late endosome, trans-Golgi network localization
Small-scale	SNP	scf_000002_A_fumigatus_A1163	3081353	3081354	C->T	Y	AFUB_027760	3080720	3084040	NA	Ortholog of A. nidulans FGSC A4 : AN6217, A. niger CBS 513.88 : An02g04130, A. oryzae RIB40 : AO090026000440, Aspergillus wentii : Aspwe1_0053972 and Aspergillus sydowii : Aspsy1_0152133
Small-scale	SNP	scf_000002_A_fumigatus_A1163	3083569	3083570	C->A	Y	AFUB_027760	3080720	3084040	NA	Ortholog of A. nidulans FGSC A4 : AN6217, A. niger CBS 513.88 : An02g04130, A. oryzae RIB40 : AO090026000440, Aspergillus wentii : Aspwe1_0053972 and Aspergillus sydowii : Aspsy1_0152133
Small-scale	SNP	scf_000002_A_fumigatus_A1163	3091467	3091468	G->A	Y	AFUB_027800	3090250	3091910	NA	Ortholog(s) have cytoplasm localization
Small-scale	SNP	scf_000002_A_fumigatus_A1163	3097573	3097574	T->G	Y	AFUB_027830	3095288	3098420	NA	Has domain(s) with predicted ion channel activity, voltage-gated chloride channel activity, role in chloride transport, transmembrane transport and membrane localization
Small-scale	SNP	scf_000002_A_fumigatus_A1163	3101387	3101388	C->T	Y	AFUB_027840	3098841	3113757	NA	Ortholog(s) have role in rRNA processing, ribosomal large subunit assembly and mitochondrion, mitotic spindle pole body, nucleoplasm, preribosome, large subunit precursor localization
Small-scale	SNP	scf_000002_A_fumigatus_A1163	3101972	3101973	A->G	Y	AFUB_027840	3098841	3113757	NA	Ortholog(s) have role in rRNA processing, ribosomal large subunit assembly and mitochondrion, mitotic spindle pole body, nucleoplasm, preribosome, large subunit precursor localization
Small-scale	SNP	scf_000002_A_fumigatus_A1163	3108332	3108333	A->G	Y	AFUB_027840	3098841	3113757	NA	Ortholog(s) have role in rRNA processing, ribosomal large subunit assembly and mitochondrion, mitotic spindle pole body, nucleoplasm, preribosome, large subunit precursor localization
Small-scale	SNP	scf_000002_A_fumigatus_A1163	3108581	3108582	T->C	Y	AFUB_027840	3098841	3113757	NA	Ortholog(s) have role in rRNA processing, ribosomal large subunit assembly and mitochondrion, mitotic spindle pole body, nucleoplasm, preribosome, large subunit precursor localization
Small-scale	SNP	scf_000002_A_fumigatus_A1163	3109535	3109536	T->G	Y	AFUB_027840	3098841	3113757	NA	Ortholog(s) have role in rRNA processing, ribosomal large subunit assembly and mitochondrion, mitotic spindle pole body, nucleoplasm, preribosome, large subunit precursor localization
Small-scale	SNP	scf_000002_A_fumigatus_A1163	3109598	3109599	T->G	Y	AFUB_027840	3098841	3113757	NA	Ortholog(s) have role in rRNA processing, ribosomal large subunit assembly and mitochondrion, mitotic spindle pole body, nucleoplasm, preribosome, large subunit precursor localization
Small-scale	SNP	scf_000002_A_fumigatus_A1163	3111612	3111613	A->G	Y	AFUB_027840	3098841	3113757	NA	Ortholog(s) have role in rRNA processing, ribosomal large subunit assembly and mitochondrion, mitotic spindle pole body, nucleoplasm, preribosome, large subunit precursor localization
Small-scale	SNP	scf_000002_A_fumigatus_A1163	3118516	3118517	G->A	Y	AFUB_027870	3117169	3118882	NA	Ortholog(s) have Golgi apparatus, endoplasmic reticulum, fungal-type vacuole membrane localization
Small-scale	SNP	scf_000002_A_fumigatus_A1163	3123411	3123412	C->A	Y	AFUB_027900	3123224	3126434	sin1	Ortholog of S. pombe sin1 and A. niger Ramosa
Small-scale	SNP	scf_000002_A_fumigatus_A1163	3126364	3126365	A->G	Y	AFUB_027900	3123224	3126434	sin1	Ortholog of S. pombe sin1 and A. niger Ramosa
Small-scale	SNP	scf_000002_A_fumigatus_A1163	3129169	3129170	G->A	Y	AFUB_027910	3126625	3130454	NA	Ortholog(s) have role in DNA strand elongation involved in DNA replication, UV-damage excision repair, mitotic DNA replication and Elg1 RFC-like complex, nucleus localization
Small-scale	SNP	scf_000002_A_fumigatus_A1163	3130759	3130760	T->C	Y	AFUB_027920	3130640	3131466	NA	Ortholog(s) have structural constituent of ribosome activity, role in mitochondrial translation and mitochondrial large ribosomal subunit localization
Small-scale	SNP	scf_000002_A_fumigatus_A1163	3133987	3133988	C->T	Y	AFUB_027930	3132276	3133988	NA	Ortholog(s) have role in DNA strand elongation involved in DNA replication, UV-damage excision repair and Elg1 RFC-like complex, cytosol, nucleus localization
Small-scale	SNP	scf_000002_A_fumigatus_A1163	3136929	3136930	T->C	Y	AFUB_027950	3136355	3138580	NA	Ortholog of Neosartorya fischeri NRRL 181 : NFIA_087440, Aspergillus fumigatus A1163 : AFUB_027950 and Aspergillus clavatus NRRL 1 : ACLA_071140
Small-scale	SNP	scf_000002_A_fumigatus_A1163	3139478	3139479	G->A	Y	AFUB_027960	3138652	3141417	NA	Ortholog of A. nidulans FGSC A4 : AN6296, A. niger CBS 513.88 : An02g04340, A. oryzae RIB40 : AO090026000420, Aspergillus wentii : Aspwe1_0118064 and Aspergillus sydowii : Aspsy1_0152200
Small-scale	SNP	scf_000002_A_fumigatus_A1163	3142980	3142981	T->C	Y	AFUB_027970	3141586	3143886	NA	Has domain(s) with predicted protein dimerization activity
Small-scale	SNP	scf_000002_A_fumigatus_A1163	3146282	3146283	T->G	Y	AFUB_027990	3146007	3148299	acuM	Putative regulator of genes involved in gluconeogenesis
Small-scale	SNP	scf_000002_A_fumigatus_A1163	3150135	3150136	A->G	Y	AFUB_028000	3149489	3150761	NA	Has domain(s) with predicted role in meiotic cell cycle
Small-scale	SNP	scf_000002_A_fumigatus_A1163	3150377	3150378	T->C	Y	AFUB_028000	3149489	3150761	NA	Has domain(s) with predicted role in meiotic cell cycle
Small-scale	SNP	scf_000002_A_fumigatus_A1163	3152021	3152022	C->T	Y	AFUB_028010	3151709	3152561	NA	Ortholog of Neosartorya fischeri NRRL 181 : NFIA_087490, Aspergillus fumigatus A1163 : AFUB_028010 and Aspergillus clavatus NRRL 1 : ACLA_071200
Small-scale	SNP	scf_000002_A_fumigatus_A1163	3163227	3163228	T->C	Y	AFUB_028050	3162000	3163877	NA	Ortholog(s) have protein kinase activator activity
Small-scale	SNP	scf_000002_A_fumigatus_A1163	3169388	3169389	A->G	Y	AFUB_028070	3165610	3169645	NA	Ortholog(s) have cytoplasm localization
Small-scale	SNP	scf_000002_A_fumigatus_A1163	3169394	3169395	C->A	Y	AFUB_028070	3165610	3169645	NA	Ortholog(s) have cytoplasm localization
Small-scale	SNP	scf_000002_A_fumigatus_A1163	3174654	3174655	T->G	Y	AFUB_028090	3173621	3176371	NA	Protein expressed at higher levels in 48 h biofilm vs planktonic cells
Small-scale	SNP	scf_000002_A_fumigatus_A1163	3179856	3179857	C->T	Y	AFUB_028120	3179855	3180307	NA	Ortholog(s) have role in mitochondrial respiratory chain complex II assembly and mitochondrial matrix localization
Small-scale	SNP	scf_000002_A_fumigatus_A1163	3182843	3182844	A->G	Y	AFUB_028140	3182688	3184210	NA	Ortholog(s) have role in actin cortical patch localization, arginine transport, cellular protein localization, endocytosis, late endosome to vacuole transport and lysine transport, more
Small-scale	SNP	scf_000002_A_fumigatus_A1163	3186776	3186777	T->C	Y	AFUB_028150	3185490	3187487	NA	Has domain(s) with predicted hydrolase activity and role in metabolic process
Small-scale	SNP	scf_000002_A_fumigatus_A1163	3194355	3194356	G->C	Y	AFUB_028180	3194031	3198495	NA	Ortholog of A. nidulans FGSC A4 : AN6280, A. niger CBS 513.88 : An02g04750, A. oryzae RIB40 : AO090026000847, Aspergillus wentii : Aspwe1_0044488 and Aspergillus sydowii : Aspsy1_0150855
Small-scale	SNP	scf_000002_A_fumigatus_A1163	3194428	3194429	T->A	Y	AFUB_028180	3194031	3198495	NA	Ortholog of A. nidulans FGSC A4 : AN6280, A. niger CBS 513.88 : An02g04750, A. oryzae RIB40 : AO090026000847, Aspergillus wentii : Aspwe1_0044488 and Aspergillus sydowii : Aspsy1_0150855
Small-scale	SNP	scf_000002_A_fumigatus_A1163	3199508	3199509	C->T	Y	AFUB_028190	3199334	3201808	NA	Putative carnitine acetyl transferase with a predicted role in acetate metabolism
Small-scale	SNP	scf_000002_A_fumigatus_A1163	3201505	3201506	C->T	Y	AFUB_028190	3199334	3201808	NA	Putative carnitine acetyl transferase with a predicted role in acetate metabolism
Small-scale	SNP	scf_000002_A_fumigatus_A1163	3211649	3211650	A->G	Y	AFUB_028220	3211241	3212966	NA	Has domain(s) with predicted 4-alpha-hydroxytetrahydrobiopterin dehydratase activity and role in tetrahydrobiopterin biosynthetic process
Small-scale	SNP	scf_000002_A_fumigatus_A1163	3215515	3215516	T->C	Y	AFUB_028230	3213845	3217286	NA	Ortholog of A. nidulans FGSC A4 : AN6275, A. niger CBS 513.88 : An02g01500, A. oryzae RIB40 : AO090026000362, Aspergillus wentii : Aspwe1_0116943 and Aspergillus sydowii : Aspsy1_0151369
Small-scale	SNP	scf_000002_A_fumigatus_A1163	3215545	3215546	G->C	Y	AFUB_028230	3213845	3217286	NA	Ortholog of A. nidulans FGSC A4 : AN6275, A. niger CBS 513.88 : An02g01500, A. oryzae RIB40 : AO090026000362, Aspergillus wentii : Aspwe1_0116943 and Aspergillus sydowii : Aspsy1_0151369
Small-scale	SNP	scf_000002_A_fumigatus_A1163	3220416	3220417	T->C	Y	AFUB_028250	3219268	3221119	NA	Ortholog of S. cerevisiae : MTC6, A. nidulans FGSC A4 : AN6270, A. niger CBS 513.88 : An02g01520, Aspergillus wentii : Aspwe1_0031301 and Aspergillus sydowii : Aspsy1_0089695
Small-scale	SNP	scf_000002_A_fumigatus_A1163	3223158	3223159	G->A	Y	AFUB_028260	3221389	3223856	NA	Ortholog of A. nidulans FGSC A4 : AN6271, A. niger CBS 513.88 : An02g01530, A. oryzae RIB40 : AO090026000355, Aspergillus wentii : Aspwe1_0175672 and Aspergillus sydowii : Aspsy1_0152443
Small-scale	SNP	scf_000002_A_fumigatus_A1163	3223193	3223194	A->G	Y	AFUB_028260	3221389	3223856	NA	Ortholog of A. nidulans FGSC A4 : AN6271, A. niger CBS 513.88 : An02g01530, A. oryzae RIB40 : AO090026000355, Aspergillus wentii : Aspwe1_0175672 and Aspergillus sydowii : Aspsy1_0152443
Small-scale	SNP	scf_000002_A_fumigatus_A1163	3223455	3223456	A->G	Y	AFUB_028260	3221389	3223856	NA	Ortholog of A. nidulans FGSC A4 : AN6271, A. niger CBS 513.88 : An02g01530, A. oryzae RIB40 : AO090026000355, Aspergillus wentii : Aspwe1_0175672 and Aspergillus sydowii : Aspsy1_0152443
Small-scale	SNP	scf_000002_A_fumigatus_A1163	3240568	3240569	A->C	Y	AFUB_028340	3239911	3241776	NA	Has domain(s) with predicted zinc ion binding activity
Small-scale	SNP	scf_000002_A_fumigatus_A1163	3240667	3240668	G->C	Y	AFUB_028340	3239911	3241776	NA	Has domain(s) with predicted zinc ion binding activity
Small-scale	SNP	scf_000002_A_fumigatus_A1163	3241620	3241621	A->T	Y	AFUB_028340	3239911	3241776	NA	Has domain(s) with predicted zinc ion binding activity
Small-scale	SNP	scf_000002_A_fumigatus_A1163	3269364	3269365	G->A	Y	AFUB_028460	3269109	3270736	NA	Has domain(s) with predicted transferase activity, transferring hexosyl groups activity and role in metabolic process
Small-scale	SNP	scf_000002_A_fumigatus_A1163	3275001	3275002	A->G	Y	AFUB_028470	3273577	3275469	gel3	Putative GPI anchored beta(1-3)glucanosyltransferase, belongs to the 7-member GEL family
Small-scale	SNP	scf_000002_A_fumigatus_A1163	3277228	3277229	A->C	Y	AFUB_028480	3276086	3279185	NA	Ortholog(s) have cytosol, nucleus localization
Small-scale	SNP	scf_000002_A_fumigatus_A1163	3282925	3282926	T->C	Y	AFUB_028500	3280894	3283808	NA	Ortholog(s) have nucleus localization
Small-scale	SNP	scf_000002_A_fumigatus_A1163	3294296	3294297	A->G	Y	AFUB_028540	3292533	3295391	NA	Has domain(s) with predicted ATP binding, nucleoside-triphosphatase activity, nucleotide binding activity
Small-scale	SNP	scf_000002_A_fumigatus_A1163	3300903	3300904	A->C	Y	AFUB_028560	3297932	3304973	NA	Ortholog(s) have role in double-strand break repair via homologous recombination, replication fork processing and nucleus localization
Small-scale	SNP	scf_000002_A_fumigatus_A1163	3303722	3303723	G->A	Y	AFUB_028560	3297932	3304973	NA	Ortholog(s) have role in double-strand break repair via homologous recombination, replication fork processing and nucleus localization
Small-scale	SNP	scf_000002_A_fumigatus_A1163	3304240	3304241	G->T	Y	AFUB_028560	3297932	3304973	NA	Ortholog(s) have role in double-strand break repair via homologous recombination, replication fork processing and nucleus localization
Small-scale	SNP	scf_000002_A_fumigatus_A1163	3306763	3306764	A->C	Y	AFUB_028580	3306267	3308484	NA	Has domain(s) with predicted Ino80 complex localization
Small-scale	SNP	scf_000002_A_fumigatus_A1163	3309709	3309710	G->T	Y	AFUB_028590	3308938	3310200	NA	Ortholog(s) have role in regulation of cytolysis
Small-scale	SNP	scf_000002_A_fumigatus_A1163	3316538	3316539	A->G	Y	AFUB_028620	3316103	3316826	NA	Ortholog of A. niger CBS 513.88 : An02g01710, Neosartorya fischeri NRRL 181 : NFIA_088170, Aspergillus kawachii : Aspka1_0172685 and Aspergillus fumigatus A1163 : AFUB_028620
Small-scale	SNP	scf_000002_A_fumigatus_A1163	3316654	3316655	A->C	Y	AFUB_028620	3316103	3316826	NA	Ortholog of A. niger CBS 513.88 : An02g01710, Neosartorya fischeri NRRL 181 : NFIA_088170, Aspergillus kawachii : Aspka1_0172685 and Aspergillus fumigatus A1163 : AFUB_028620
Small-scale	SNP	scf_000002_A_fumigatus_A1163	3316956	3316957	A->T	Y	AFUB_028630	3316856	3317913	NA	Putative cytochrome c oxidase polypeptide
Small-scale	SNP	scf_000002_A_fumigatus_A1163	3318292	3318293	T->G	Y	AFUB_028640	3318286	3319472	NA	Ortholog(s) have dicarboxylic acid transmembrane transporter activity, role in dicarboxylic acid transport and mitochondrial envelope, plasma membrane localization
Small-scale	SNP	scf_000002_A_fumigatus_A1163	3318718	3318719	A->G	Y	AFUB_028640	3318286	3319472	NA	Ortholog(s) have dicarboxylic acid transmembrane transporter activity, role in dicarboxylic acid transport and mitochondrial envelope, plasma membrane localization
Small-scale	SNP	scf_000002_A_fumigatus_A1163	3322119	3322120	T->G	Y	AFUB_028660	3321502	3323058	NA	Ortholog(s) have phenylalanine-tRNA ligase activity, role in mitochondrial phenylalanyl-tRNA aminoacylation and mitochondrion localization
Small-scale	SNP	scf_000002_A_fumigatus_A1163	3322294	3322295	C->G	Y	AFUB_028660	3321502	3323058	NA	Ortholog(s) have phenylalanine-tRNA ligase activity, role in mitochondrial phenylalanyl-tRNA aminoacylation and mitochondrion localization
Small-scale	SNP	scf_000002_A_fumigatus_A1163	3335441	3335442	G->A	Y	AFUB_028710	3334220	3336162	NA	Ortholog(s) have bis(5'-adenosyl)-hexaphosphatase activity, bis(5'-adenosyl)-pentaphosphatase activity, diphosphoinositol-polyphosphate diphosphatase activity and endopolyphosphatase activity, more
Small-scale	SNP	scf_000002_A_fumigatus_A1163	3335629	3335630	T->C	Y	AFUB_028710	3334220	3336162	NA	Ortholog(s) have bis(5'-adenosyl)-hexaphosphatase activity, bis(5'-adenosyl)-pentaphosphatase activity, diphosphoinositol-polyphosphate diphosphatase activity and endopolyphosphatase activity, more
Small-scale	SNP	scf_000002_A_fumigatus_A1163	3335680	3335681	G->T	Y	AFUB_028710	3334220	3336162	NA	Ortholog(s) have bis(5'-adenosyl)-hexaphosphatase activity, bis(5'-adenosyl)-pentaphosphatase activity, diphosphoinositol-polyphosphate diphosphatase activity and endopolyphosphatase activity, more
Small-scale	SNP	scf_000002_A_fumigatus_A1163	3342849	3342850	T->C	Y	AFUB_028740	3342152	3343205	cycA	Cytochrome c
Small-scale	SNP	scf_000002_A_fumigatus_A1163	3348595	3348596	G->A	Y	AFUB_028770	3347276	3351275	ime2	Protein with homology to Ime2p, a serine/threonine protein kinase involved in activation of meiosis of S. cerevisiae
Small-scale	SNP	scf_000002_A_fumigatus_A1163	3359217	3359218	G->A	Y	AFUB_028780	3358190	3359833	NA	Ortholog of Aspergillus fumigatus A1163 : AFUB_028780
Small-scale	SNP	scf_000002_A_fumigatus_A1163	3364929	3364930	A->C	Y	AFUB_028810	3364919	3365704	NA	Ortholog of Aspergillus fumigatus A1163 : AFUB_028810
Small-scale	SNP	scf_000002_A_fumigatus_A1163	3365683	3365684	T->C	Y	AFUB_028810	3364919	3365704	NA	Ortholog of Aspergillus fumigatus A1163 : AFUB_028810
Small-scale	SNP	scf_000002_A_fumigatus_A1163	3367906	3367907	C->T	Y	AFUB_028820	3367792	3368682	NA	Ortholog of Aspergillus fumigatus A1163 : AFUB_028820
Small-scale	SNP	scf_000002_A_fumigatus_A1163	3368363	3368364	A->T	Y	AFUB_028820	3367792	3368682	NA	Ortholog of Aspergillus fumigatus A1163 : AFUB_028820
Small-scale	SNP	scf_000002_A_fumigatus_A1163	3370809	3370810	T->C	Y	AFUB_028830	3369083	3370820	NA	Has domain(s) with predicted hydrolase activity, hydrolyzing O-glycosyl compounds activity and role in carbohydrate metabolic process
Small-scale	SNP	scf_000002_A_fumigatus_A1163	3375667	3375668	G->C	Y	AFUB_028860	3374086	3377450	NA	Has domain(s) with predicted role in response to stress
Small-scale	SNP	scf_000002_A_fumigatus_A1163	3376489	3376490	A->G	Y	AFUB_028860	3374086	3377450	NA	Has domain(s) with predicted role in response to stress
Small-scale	SNP	scf_000002_A_fumigatus_A1163	3384340	3384341	C->T	Y	AFUB_028890	3384004	3386118	medA	Putative regulator of adherence, host cell interactions and virulence
Small-scale	SNP	scf_000002_A_fumigatus_A1163	3385553	3385554	G->A	Y	AFUB_028890	3384004	3386118	medA	Putative regulator of adherence, host cell interactions and virulence
Small-scale	SNP	scf_000002_A_fumigatus_A1163	3408254	3408255	G->A	Y	AFUB_028939	3406874	3408514	NA	Ortholog(s) have hercynylcysteine sulfoxide lyase activity (ergothioneine-forming), hercynylselenocysteine lyase activity (selenoneine-forming) activity and role in ergothioneine biosynthetic process, selenoneine biosynthetic process
Small-scale	SNP	scf_000002_A_fumigatus_A1163	3415789	3415790	G->A	Y	AFUB_028980	3414875	3415816	NA	Has domain(s) with predicted nuclease activity, nucleic acid binding activity
Small-scale	SNP	scf_000002_A_fumigatus_A1163	3420049	3420050	A->C	Y	AFUB_029000	3417163	3420765	NA	Has domain(s) with predicted ATP binding, DNA binding, helicase activity, nucleic acid binding activity
Small-scale	SNP	scf_000002_A_fumigatus_A1163	3420121	3420122	C->T	Y	AFUB_029000	3417163	3420765	NA	Has domain(s) with predicted ATP binding, DNA binding, helicase activity, nucleic acid binding activity
Small-scale	SNP	scf_000002_A_fumigatus_A1163	3423681	3423682	C->G	Y	AFUB_029010	3421531	3424271	NA	Ortholog(s) have 1-phosphatidylinositol 4-kinase activity
Small-scale	SNP	scf_000002_A_fumigatus_A1163	3430627	3430628	A->G	Y	AFUB_029030	3429377	3431355	NA	Ortholog of S. cerevisiae : YMR155W, A. nidulans FGSC A4 : AN6220, A. niger CBS 513.88 : An02g02260, A. oryzae RIB40 : AO090026000316 and Aspergillus wentii : Aspwe1_0118199
Small-scale	SNP	scf_000002_A_fumigatus_A1163	3432985	3432986	C->T	Y	AFUB_029040	3431946	3433945	NA	Ortholog(s) have fungal-type vacuole membrane localization
Small-scale	SNP	scf_000002_A_fumigatus_A1163	3434108	3434109	A->G	Y	AFUB_029050	3434012	3437403	NA	Ortholog(s) have ATP binding, ATPase activity, dinucleotide insertion or deletion binding, heteroduplex DNA loop binding, single-stranded DNA binding activity and role in maintenance of DNA repeat elements, meiotic mismatch repair
Small-scale	SNP	scf_000002_A_fumigatus_A1163	3442627	3442628	C->G	Y	AFUB_029070	3438752	3444198	csmB	putative chitin synthase
Small-scale	SNP	scf_000002_A_fumigatus_A1163	3442649	3442650	A->G	Y	AFUB_029070	3438752	3444198	csmB	putative chitin synthase
Small-scale	SNP	scf_000002_A_fumigatus_A1163	3457831	3457832	T->C	Y	AFUB_029090	3453750	3458193	NA	Ortholog(s) have microtubule plus-end binding activity
Small-scale	SNP	scf_000002_A_fumigatus_A1163	3459862	3459863	T->A	Y	AFUB_029100	3458876	3461130	NA	Ortholog(s) have alpha-amylase activity, role in carbohydrate catabolic process and cell septum, cell wall-bounded periplasmic space, extracellular region, fungal-type cell wall, hyphal septin band, spitzenkorper localization
Small-scale	SNP	scf_000002_A_fumigatus_A1163	3460434	3460435	T->C	Y	AFUB_029100	3458876	3461130	NA	Ortholog(s) have alpha-amylase activity, role in carbohydrate catabolic process and cell septum, cell wall-bounded periplasmic space, extracellular region, fungal-type cell wall, hyphal septin band, spitzenkorper localization
Small-scale	SNP	scf_000002_A_fumigatus_A1163	3477706	3477707	G->A	Y	AFUB_029150	3477634	3479795	NA	Ortholog of A. nidulans FGSC A4 : AN6328, A. niger CBS 513.88 : An02g05750, A. oryzae RIB40 : AO090026000262, Aspergillus wentii : Aspwe1_0163563 and Aspergillus sydowii : Aspsy1_0997059
Small-scale	SNP	scf_000002_A_fumigatus_A1163	3479571	3479572	T->C	Y	AFUB_029150	3477634	3479795	NA	Ortholog of A. nidulans FGSC A4 : AN6328, A. niger CBS 513.88 : An02g05750, A. oryzae RIB40 : AO090026000262, Aspergillus wentii : Aspwe1_0163563 and Aspergillus sydowii : Aspsy1_0997059
Small-scale	SNP	scf_000002_A_fumigatus_A1163	3481794	3481795	C->T	Y	AFUB_029160	3480101	3490215	NA	Ortholog(s) have role in fermentation, protein maturation and mitochondrion localization
Small-scale	SNP	scf_000002_A_fumigatus_A1163	3484384	3484385	G->A	Y	AFUB_029160	3480101	3490215	NA	Ortholog(s) have role in fermentation, protein maturation and mitochondrion localization
Small-scale	SNP	scf_000002_A_fumigatus_A1163	3489226	3489227	A->G	Y	AFUB_029160	3480101	3490215	NA	Ortholog(s) have role in fermentation, protein maturation and mitochondrion localization
Small-scale	SNP	scf_000002_A_fumigatus_A1163	3490127	3490128	C->T	Y	AFUB_029160	3480101	3490215	NA	Ortholog(s) have role in fermentation, protein maturation and mitochondrion localization
Small-scale	SNP	scf_000002_A_fumigatus_A1163	3500505	3500506	G->C	Y	AFUB_029200	3498858	3500848	NA	Ortholog of A. nidulans FGSC A4 : AN6333, A. niger CBS 513.88 : An02g05660, Neosartorya fischeri NRRL 181 : NFIA_088760, Aspergillus wentii : Aspwe1_0062647 and Aspergillus versicolor : Aspve1_0131011
Small-scale	SNP	scf_000002_A_fumigatus_A1163	3505449	3505450	G->A	Y	AFUB_029210	3501569	3505690	NA	Ortholog(s) have mitotic spindle, nucleolus localization
Small-scale	SNP	scf_000002_A_fumigatus_A1163	3505963	3505964	A->G	Y	AFUB_029220	3505921	3507411	NA	Transcript up-regulated in conidia exposed to neutrophils
Small-scale	SNP	scf_000002_A_fumigatus_A1163	3509887	3509888	T->A	Y	AFUB_029240	3508678	3510661	NA	Ortholog(s) have pyruvate dehydrogenase (acetyl-transferring) kinase activity, role in carbon utilization, peptidyl-serine phosphorylation and mitochondrion localization
Small-scale	SNP	scf_000002_A_fumigatus_A1163	3509904	3509905	C->G	Y	AFUB_029240	3508678	3510661	NA	Ortholog(s) have pyruvate dehydrogenase (acetyl-transferring) kinase activity, role in carbon utilization, peptidyl-serine phosphorylation and mitochondrion localization
Small-scale	SNP	scf_000002_A_fumigatus_A1163	3510251	3510252	C->T	Y	AFUB_029240	3508678	3510661	NA	Ortholog(s) have pyruvate dehydrogenase (acetyl-transferring) kinase activity, role in carbon utilization, peptidyl-serine phosphorylation and mitochondrion localization
Small-scale	SNP	scf_000002_A_fumigatus_A1163	3516220	3516221	A->T	Y	AFUB_029270	3516174	3518660	NA	Has domain(s) with predicted catalytic activity, magnesium ion binding, thiamine pyrophosphate binding activity
Small-scale	SNP	scf_000002_A_fumigatus_A1163	3516644	3516645	G->C	Y	AFUB_029270	3516174	3518660	NA	Has domain(s) with predicted catalytic activity, magnesium ion binding, thiamine pyrophosphate binding activity
Small-scale	SNP	scf_000002_A_fumigatus_A1163	3520980	3520981	G->A	Y	AFUB_029280	3519053	3521651	aro8	Putative amino transferase
Small-scale	SNP	scf_000002_A_fumigatus_A1163	3523066	3523067	C->T	Y	AFUB_029290	3522407	3525228	NA	Has domain(s) with predicted ATP binding, protein kinase activity, protein tyrosine kinase activity and role in protein phosphorylation
Small-scale	SNP	scf_000002_A_fumigatus_A1163	3528375	3528376	C->T	Y	AFUB_029310	3527132	3528401	NA	Ortholog of A. nidulans FGSC A4 : AN2411, A. niger CBS 513.88 : An02g05520, A. oryzae RIB40 : AO090026000242, Aspergillus wentii : Aspwe1_0045469 and Aspergillus sydowii : Aspsy1_0341196
Small-scale	SNP	scf_000002_A_fumigatus_A1163	3535972	3535973	A->C	Y	AFUB_029350	3535567	3536959	NA	Ortholog(s) have RNA polymerase I activity, RNA polymerase III activity and role in tRNA transcription from RNA polymerase III promoter, transcription from RNA polymerase I promoter
Small-scale	SNP	scf_000002_A_fumigatus_A1163	3536444	3536445	A->G	Y	AFUB_029350	3535567	3536959	NA	Ortholog(s) have RNA polymerase I activity, RNA polymerase III activity and role in tRNA transcription from RNA polymerase III promoter, transcription from RNA polymerase I promoter
Small-scale	SNP	scf_000002_A_fumigatus_A1163	3536803	3536804	G->A	Y	AFUB_029350	3535567	3536959	NA	Ortholog(s) have RNA polymerase I activity, RNA polymerase III activity and role in tRNA transcription from RNA polymerase III promoter, transcription from RNA polymerase I promoter
Small-scale	SNP	scf_000002_A_fumigatus_A1163	3540552	3540553	A->C	Y	AFUB_029370	3539086	3542402	NA	Ortholog(s) have role in chromatin remodeling, positive regulation of protein phosphorylation, signal transduction involved in mitotic DNA replication checkpoint and ASTRA complex, TORC1 complex, TORC2 complex, cytosol localization
Small-scale	SNP	scf_000002_A_fumigatus_A1163	3547807	3547808	C->T	Y	AFUB_029390	3545288	3548165	NA	Ortholog(s) have role in ascospore-type prospore assembly and prospore membrane localization
Small-scale	SNP	scf_000002_A_fumigatus_A1163	3563146	3563147	T->A	Y	AFUB_029410	3561487	3565560	NA	Ortholog(s) have U2 snRNP localization
Small-scale	SNP	scf_000002_A_fumigatus_A1163	3569603	3569604	C->T	Y	AFUB_029440	3569103	3570657	NA	Has domain(s) with predicted oxidoreductase activity and role in oxidation-reduction process
Small-scale	SNP	scf_000002_A_fumigatus_A1163	3574654	3574655	C->T	Y	AFUB_029460	3573991	3580335	NA	Ortholog of A. niger CBS 513.88 : An02g05320, A. oryzae RIB40 : AO090026000191, Neosartorya fischeri NRRL 181 : NFIA_089010, Aspergillus wentii : Aspwe1_0045486 and Aspergillus versicolor : Aspve1_0481946
Small-scale	SNP	scf_000002_A_fumigatus_A1163	3574902	3574903	T->C	Y	AFUB_029460	3573991	3580335	NA	Ortholog of A. niger CBS 513.88 : An02g05320, A. oryzae RIB40 : AO090026000191, Neosartorya fischeri NRRL 181 : NFIA_089010, Aspergillus wentii : Aspwe1_0045486 and Aspergillus versicolor : Aspve1_0481946
Small-scale	SNP	scf_000002_A_fumigatus_A1163	3576158	3576159	C->T	Y	AFUB_029460	3573991	3580335	NA	Ortholog of A. niger CBS 513.88 : An02g05320, A. oryzae RIB40 : AO090026000191, Neosartorya fischeri NRRL 181 : NFIA_089010, Aspergillus wentii : Aspwe1_0045486 and Aspergillus versicolor : Aspve1_0481946
Small-scale	SNP	scf_000002_A_fumigatus_A1163	3579607	3579608	A->G	Y	AFUB_029460	3573991	3580335	NA	Ortholog of A. niger CBS 513.88 : An02g05320, A. oryzae RIB40 : AO090026000191, Neosartorya fischeri NRRL 181 : NFIA_089010, Aspergillus wentii : Aspwe1_0045486 and Aspergillus versicolor : Aspve1_0481946
Small-scale	SNP	scf_000002_A_fumigatus_A1163	3579661	3579662	C->T	Y	AFUB_029460	3573991	3580335	NA	Ortholog of A. niger CBS 513.88 : An02g05320, A. oryzae RIB40 : AO090026000191, Neosartorya fischeri NRRL 181 : NFIA_089010, Aspergillus wentii : Aspwe1_0045486 and Aspergillus versicolor : Aspve1_0481946
Small-scale	SNP	scf_000002_A_fumigatus_A1163	3589350	3589351	C->T	Y	AFUB_029480	3588200	3591969	NA	Ortholog of A. nidulans FGSC A4 : AN2425, A. niger CBS 513.88 : An02g05260, A. oryzae RIB40 : AO090026000188, Aspergillus wentii : Aspwe1_0054675 and Aspergillus sydowii : Aspsy1_0075212
Small-scale	SNP	scf_000002_A_fumigatus_A1163	3596641	3596642	G->T	Y	AFUB_029510	3596450	3598972	NA	Has domain(s) with predicted zinc ion binding activity
Small-scale	SNP	scf_000002_A_fumigatus_A1163	3596785	3596786	G->A	Y	AFUB_029510	3596450	3598972	NA	Has domain(s) with predicted zinc ion binding activity
Small-scale	SNP	scf_000002_A_fumigatus_A1163	3598290	3598291	C->G	Y	AFUB_029510	3596450	3598972	NA	Has domain(s) with predicted zinc ion binding activity
Small-scale	SNP	scf_000002_A_fumigatus_A1163	3619565	3619566	C->T	Y	AFUB_029580	3618200	3619995	NA	Ortholog of Aspergillus fumigatus A1163 : AFUB_029580
Small-scale	SNP	scf_000002_A_fumigatus_A1163	3623092	3623093	T->A	Y	AFUB_029600	3622995	3624752	NA	Ortholog of A. nidulans FGSC A4 : AN11858, A. oryzae RIB40 : AO090026000164, Neosartorya fischeri NRRL 181 : NFIA_089160, Aspergillus wentii : Aspwe1_0119587 and Aspergillus clavatus NRRL 1 : ACLA_073640
Small-scale	SNP	scf_000002_A_fumigatus_A1163	3625941	3625942	G->A	Y	AFUB_029610	3624996	3627114	NA	Ortholog(s) have ATP-dependent DNA helicase activity, ATP-dependent DNA/RNA helicase activity, ATP-dependent RNA helicase activity, mRNA binding activity
Small-scale	SNP	scf_000002_A_fumigatus_A1163	3640304	3640305	G->A	Y	AFUB_029640	3639147	3641102	NA	Ortholog of A. nidulans FGSC A4 : AN6370, A. oryzae RIB40 : AO090026000159, Aspergillus wentii : Aspwe1_0696714, Aspergillus sydowii : Aspsy1_0031745 and Aspergillus terreus NIH2624 : ATET_01392
Small-scale	SNP	scf_000002_A_fumigatus_A1163	3642238	3642239	G->A	Y	AFUB_029650	3642222	3644506	NA	Putative ABC transporter
Small-scale	SNP	scf_000002_A_fumigatus_A1163	3643705	3643706	C->G	Y	AFUB_029650	3642222	3644506	NA	Putative ABC transporter
Small-scale	SNP	scf_000002_A_fumigatus_A1163	3655334	3655335	G->A	Y	AFUB_029700	3652574	3656603	NA	Ortholog(s) have role in mitotic chromosome condensation, mitotic sister chromatid cohesion, positive regulation of maintenance of mitotic sister chromatid cohesion, centromeric and cytosol, nuclear mitotic cohesin complex localization
Small-scale	SNP	scf_000002_A_fumigatus_A1163	3663424	3663425	G->T	Y	AFUB_029730	3662602	3665353	NA	Ortholog(s) have protein binding, bridging, ubiquitin binding activity
Small-scale	SNP	scf_000002_A_fumigatus_A1163	3680131	3680132	C->T	Y	AFUB_029780	3678201	3680776	atg20	Putative autophagy protein
Small-scale	SNP	scf_000002_A_fumigatus_A1163	3691882	3691883	C->T	Y	AFUB_029820	3691204	3694175	NA	Has domain(s) with predicted ATP binding, protein kinase activity, protein tyrosine kinase activity and role in protein phosphorylation
Small-scale	SNP	scf_000002_A_fumigatus_A1163	3694413	3694414	A->C	Y	AFUB_029830	3694210	3696454	ilv3	Putative mitochondrial dihydroxy acid dehydratase
Small-scale	SNP	scf_000002_A_fumigatus_A1163	3700234	3700235	T->C	Y	AFUB_029850	3698856	3700950	NA	Has domain(s) with predicted role in transmembrane transport and integral component of membrane localization
Small-scale	SNP	scf_000002_A_fumigatus_A1163	3706413	3706414	C->T	Y	AFUB_029870	3704888	3706540	NA	Has domain(s) with predicted DNA binding, protein heterodimerization activity, sequence-specific DNA binding activity, role in nucleosome assembly and intracellular, nucleosome, nucleus localization
Small-scale	SNP	scf_000002_A_fumigatus_A1163	3707844	3707845	A->G	Y	AFUB_029880	3707624	3711359	NA	Ortholog of A. nidulans FGSC A4 : AN6342, A. niger CBS 513.88 : An02g01220, A. oryzae RIB40 : AO090023000107, Aspergillus wentii : Aspwe1_0045565 and Aspergillus sydowii : Aspsy1_0031691
Small-scale	SNP	scf_000002_A_fumigatus_A1163	3708314	3708315	T->C	Y	AFUB_029880	3707624	3711359	NA	Ortholog of A. nidulans FGSC A4 : AN6342, A. niger CBS 513.88 : An02g01220, A. oryzae RIB40 : AO090023000107, Aspergillus wentii : Aspwe1_0045565 and Aspergillus sydowii : Aspsy1_0031691
Small-scale	SNP	scf_000002_A_fumigatus_A1163	3713541	3713542	C->T	Y	AFUB_029890	3712959	3715796	NA	Putative actin-binding protein
Small-scale	SNP	scf_000002_A_fumigatus_A1163	3727955	3727956	C->A	Y	AFUB_029950	3727347	3728215	NA	Ortholog of Aspergillus fumigatus A1163 : AFUB_029950
Small-scale	SNP	scf_000002_A_fumigatus_A1163	3734186	3734187	T->G	Y	AFUB_029980	3733363	3735881	eng2	GPI-anchored endo-beta-1,3-glucanase
Small-scale	SNP	scf_000002_A_fumigatus_A1163	3751354	3751355	A->C	Y	AFUB_030050	3749561	3751382	NA	Has domain(s) with predicted electron carrier activity, heme binding, iron ion binding, monooxygenase activity, oxidoreductase activity, acting on paired donors, with incorporation or reduction of molecular oxygen activity
Small-scale	SNP	scf_000002_A_fumigatus_A1163	3762718	3762719	G->T	Y	AFUB_030110	3762031	3763821	NA	Putative endoglucanase
Small-scale	SNP	scf_000002_A_fumigatus_A1163	3766634	3766635	T->C	Y	AFUB_030130	3766083	3770364	NA	Ortholog of A. nidulans FGSC A4 : AN2391, A. niger CBS 513.88 : An02g00660, An07g03040, A. oryzae RIB40 : AO090023000055, AO090026000077, AO090020000644 and Aspergillus wentii : Aspwe1_0163838
Small-scale	SNP	scf_000002_A_fumigatus_A1163	3768027	3768028	T->C	Y	AFUB_030130	3766083	3770364	NA	Ortholog of A. nidulans FGSC A4 : AN2391, A. niger CBS 513.88 : An02g00660, An07g03040, A. oryzae RIB40 : AO090023000055, AO090026000077, AO090020000644 and Aspergillus wentii : Aspwe1_0163838
Small-scale	SNP	scf_000002_A_fumigatus_A1163	3768950	3768951	C->T	Y	AFUB_030130	3766083	3770364	NA	Ortholog of A. nidulans FGSC A4 : AN2391, A. niger CBS 513.88 : An02g00660, An07g03040, A. oryzae RIB40 : AO090023000055, AO090026000077, AO090020000644 and Aspergillus wentii : Aspwe1_0163838
Small-scale	SNP	scf_000002_A_fumigatus_A1163	3774880	3774881	C->T	Y	AFUB_030140	3773515	3775717	NA	Secreted hydrolase
Small-scale	SNP	scf_000002_A_fumigatus_A1163	3795927	3795928	T->C	Y	AFUB_030220	3795479	3798478	NA	MFS monosaccharide transporter
Small-scale	SNP	scf_000002_A_fumigatus_A1163	3796251	3796252	A->G	Y	AFUB_030220	3795479	3798478	NA	MFS monosaccharide transporter
Small-scale	SNP	scf_000002_A_fumigatus_A1163	3800287	3800288	G->A	Y	AFUB_030230	3798632	3800711	NA	Ortholog(s) have sterol esterase activity, role in cell wall mannoprotein biosynthetic process, sterol metabolic process and integral component of membrane, plasma membrane localization
Small-scale	SNP	scf_000002_A_fumigatus_A1163	3800382	3800383	G->C	Y	AFUB_030230	3798632	3800711	NA	Ortholog(s) have sterol esterase activity, role in cell wall mannoprotein biosynthetic process, sterol metabolic process and integral component of membrane, plasma membrane localization
Small-scale	SNP	scf_000002_A_fumigatus_A1163	3813186	3813187	G->A	Y	AFUB_030290	3812477	3814725	NA	Has domain(s) with predicted ATP binding, protein kinase activity and role in protein phosphorylation
Small-scale	SNP	scf_000002_A_fumigatus_A1163	3821547	3821548	C->T	Y	AFUB_030300	3820944	3822124	NA	NA
Small-scale	SNP	scf_000002_A_fumigatus_A1163	3862116	3862117	C->T	Y	AFUB_030400	3861889	3864187	NA	Putative BCS1-like ATPase
Small-scale	SNP	scf_000002_A_fumigatus_A1163	3864859	3864860	G->A	Y	AFUB_030410	3864330	3866926	NA	Has domain(s) with predicted catalytic activity and role in metabolic process
Small-scale	SNP	scf_000002_A_fumigatus_A1163	3865279	3865280	A->C	Y	AFUB_030410	3864330	3866926	NA	Has domain(s) with predicted catalytic activity and role in metabolic process
Small-scale	SNP	scf_000002_A_fumigatus_A1163	3874277	3874278	T->G	Y	AFUB_030430	3870396	3874329	NA	Ortholog of A. nidulans FGSC A4 : AN7552, A. oryzae RIB40 : AO090026000798, Aspergillus wentii : Aspwe1_0692743, Aspergillus sydowii : Aspsy1_0058559 and Aspergillus terreus NIH2624 : ATET_07821
Small-scale	SNP	scf_000002_A_fumigatus_A1163	3877477	3877478	G->A	Y	AFUB_030440	3875134	3879147	NA	Has domain(s) with predicted protein dimerization activity
Small-scale	SNP	scf_000002_A_fumigatus_A1163	3878945	3878946	C->T	Y	AFUB_030440	3875134	3879147	NA	Has domain(s) with predicted protein dimerization activity
Small-scale	SNP	scf_000002_A_fumigatus_A1163	3884172	3884173	T->A	Y	AFUB_030450	3882927	3887030	NA	Ortholog(s) have peptidyl-proline dioxygenase activity
Small-scale	SNP	scf_000002_A_fumigatus_A1163	3886470	3886471	G->A	Y	AFUB_030450	3882927	3887030	NA	Ortholog(s) have peptidyl-proline dioxygenase activity
Small-scale	SNP	scf_000002_A_fumigatus_A1163	3886708	3886709	T->C	Y	AFUB_030450	3882927	3887030	NA	Ortholog(s) have peptidyl-proline dioxygenase activity
Small-scale	SNP	scf_000002_A_fumigatus_A1163	3890134	3890135	A->G	Y	AFUB_030480	3889716	3891751	NA	Has domain(s) with predicted flavin adenine dinucleotide binding, oxidoreductase activity, acting on CH-OH group of donors activity and role in oxidation-reduction process
Small-scale	SNP	scf_000002_A_fumigatus_A1163	3891388	3891389	G->A	Y	AFUB_030480	3889716	3891751	NA	Has domain(s) with predicted flavin adenine dinucleotide binding, oxidoreductase activity, acting on CH-OH group of donors activity and role in oxidation-reduction process
Small-scale	SNP	scf_000002_A_fumigatus_A1163	3891603	3891604	T->G	Y	AFUB_030480	3889716	3891751	NA	Has domain(s) with predicted flavin adenine dinucleotide binding, oxidoreductase activity, acting on CH-OH group of donors activity and role in oxidation-reduction process
Small-scale	SNP	scf_000002_A_fumigatus_A1163	3897090	3897091	T->C	Y	AFUB_030520	3896086	3897546	NA	Ortholog(s) have cytosol, transcription factor TFIID complex localization
Small-scale	SNP	scf_000002_A_fumigatus_A1163	3901636	3901637	A->C	Y	AFUB_030550	3901210	3901772	NA	Ortholog(s) have role in mitochondrial respiratory chain complex I assembly
Small-scale	SNP	scf_000002_A_fumigatus_A1163	3905053	3905054	C->G	Y	AFUB_030570	3904657	3909106	NA	Ortholog(s) have role in DNA damage checkpoint and nucleus localization
Small-scale	SNP	scf_000002_A_fumigatus_A1163	3914646	3914647	T->C	Y	AFUB_030600	3913422	3916107	NA	Ortholog(s) have nucleus localization
Small-scale	SNP	scf_000002_A_fumigatus_A1163	3915560	3915561	A->G	Y	AFUB_030600	3913422	3916107	NA	Ortholog(s) have nucleus localization
Small-scale	SNP	scf_000002_A_fumigatus_A1163	3916986	3916987	A->G	Y	AFUB_030610	3916308	3917426	NA	Ortholog(s) have RNA polymerase II activating transcription factor binding, glutathione disulfide oxidoreductase activity
Small-scale	SNP	scf_000002_A_fumigatus_A1163	3916987	3916988	C->G	Y	AFUB_030610	3916308	3917426	NA	Ortholog(s) have RNA polymerase II activating transcription factor binding, glutathione disulfide oxidoreductase activity
Small-scale	SNP	scf_000002_A_fumigatus_A1163	3919721	3919722	A->G	Y	AFUB_030630	3919692	3921136	NA	Ortholog(s) have thiamine transmembrane transporter activity, role in thiamine pyrophosphate transport and integral component of mitochondrial inner membrane localization
Small-scale	SNP	scf_000002_A_fumigatus_A1163	3929853	3929854	C->G	Y	AFUB_030660	3929602	3935848	NA	Ortholog(s) have protein kinase activity
Small-scale	SNP	scf_000002_A_fumigatus_A1163	3943957	3943958	C->T	Y	AFUB_030680	3942928	3944229	erg26	Putative C-3 sterol dehydrogenase/C-4 decarboxylase
Small-scale	SNP	scf_000002_A_fumigatus_A1163	3946706	3946707	T->C	Y	AFUB_030690	3944535	3947011	NA	Has domain(s) with predicted acid-amino acid ligase activity
Small-scale	SNP	scf_000002_A_fumigatus_A1163	3950780	3950781	C->A	Y	AFUB_030700	3948070	3952882	NA	Ortholog(s) have GTPase activator activity
Small-scale	SNP	scf_000002_A_fumigatus_A1163	3958988	3958989	T->C	Y	AFUB_030740	3958713	3959317	NA	Ortholog of Aspergillus fumigatus A1163 : AFUB_030740
Small-scale	SNP	scf_000002_A_fumigatus_A1163	3976188	3976189	G->A	Y	AFUB_030790	3971061	3977112	abcA	Ortholog(s) have ATP binding, drug binding, drug transmembrane transporter activity, fluconazole transporter activity, phospholipid-translocating ATPase activity
Small-scale	SNP	scf_000002_A_fumigatus_A1163	3979401	3979402	A->C	Y	AFUB_030800	3977912	3980709	NA	Putative MSF drug transporter
Small-scale	SNP	scf_000002_A_fumigatus_A1163	3982084	3982085	C->G	Y	AFUB_030810	3980907	3983288	NA	Ortholog of A. nidulans FGSC A4 : AN5275, AN10972, A. fumigatus Af293 : Afu5g02940 and A. niger CBS 513.88 : An09g05010, An15g01900, An09g03350
Small-scale	SNP	scf_000002_A_fumigatus_A1163	3982476	3982477	A->G	Y	AFUB_030810	3980907	3983288	NA	Ortholog of A. nidulans FGSC A4 : AN5275, AN10972, A. fumigatus Af293 : Afu5g02940 and A. niger CBS 513.88 : An09g05010, An15g01900, An09g03350
Small-scale	SNP	scf_000002_A_fumigatus_A1163	3983538	3983539	T->C	Y	AFUB_030820	3983400	3985674	NA	Ortholog(s) have alpha-L-arabinofuranosidase activity, role in L-arabinose metabolic process, hemicellulose catabolic process and extracellular region localization
Small-scale	SNP	scf_000002_A_fumigatus_A1163	3989904	3989905	G->T	Y	AFUB_030840	3989705	3992194	NA	Ortholog of A. nidulans FGSC A4 : AN7583, A. niger CBS 513.88 : An09g03380, Aspergillus wentii : Aspwe1_0117969, Aspergillus sydowii : Aspsy1_0152812 and Aspergillus terreus NIH2624 : ATET_07870
Small-scale	SNP	scf_000002_A_fumigatus_A1163	3989919	3989920	G->A	Y	AFUB_030840	3989705	3992194	NA	Ortholog of A. nidulans FGSC A4 : AN7583, A. niger CBS 513.88 : An09g03380, Aspergillus wentii : Aspwe1_0117969, Aspergillus sydowii : Aspsy1_0152812 and Aspergillus terreus NIH2624 : ATET_07870
Small-scale	SNP	scf_000002_A_fumigatus_A1163	3998766	3998767	A->G	Y	AFUB_030850	3997985	3999074	NA	Ortholog of A. nidulans FGSC A4 : AN7587, A. niger CBS 513.88 : An09g03440, A. oryzae RIB40 : AO090012000301, Aspergillus wentii : Aspwe1_0054076 and Aspergillus sydowii : Aspsy1_0058595
Small-scale	SNP	scf_000002_A_fumigatus_A1163	4000345	4000346	A->G	Y	AFUB_030860	3999329	4000827	NA	Ortholog(s) have ribulose-phosphate 3-epimerase activity, role in pentose-phosphate shunt and cytosol, nucleus localization
Small-scale	SNP	scf_000002_A_fumigatus_A1163	4000668	4000669	G->A	Y	AFUB_030860	3999329	4000827	NA	Ortholog(s) have ribulose-phosphate 3-epimerase activity, role in pentose-phosphate shunt and cytosol, nucleus localization
Small-scale	SNP	scf_000002_A_fumigatus_A1163	4004626	4004627	A->G	Y	AFUB_030870	4001044	4004751	NA	Has domain(s) with predicted methyltransferase activity and role in metabolic process
Small-scale	SNP	scf_000002_A_fumigatus_A1163	4004671	4004672	T->C	Y	AFUB_030870	4001044	4004751	NA	Has domain(s) with predicted methyltransferase activity and role in metabolic process
Small-scale	SNP	scf_000002_A_fumigatus_A1163	4019306	4019307	C->T	Y	AFUB_030930	4018679	4020142	NA	Has domain(s) with predicted DNA binding, RNA polymerase II transcription factor activity, sequence-specific DNA binding, zinc ion binding activity and role in regulation of transcription, DNA-templated, transcription, DNA-templated
Small-scale	SNP	scf_000002_A_fumigatus_A1163	4019991	4019992	A->C	Y	AFUB_030930	4018679	4020142	NA	Has domain(s) with predicted DNA binding, RNA polymerase II transcription factor activity, sequence-specific DNA binding, zinc ion binding activity and role in regulation of transcription, DNA-templated, transcription, DNA-templated
Small-scale	SNP	scf_000002_A_fumigatus_A1163	4032210	4032211	T->C	Y	AFUB_030980	4030852	4032519	NA	Has domain(s) with predicted role in transmembrane transport and integral component of membrane localization
Small-scale	SNP	scf_000002_A_fumigatus_A1163	4033199	4033200	A->T	Y	AFUB_030990	4032713	4033488	NA	Ortholog of A. niger CBS 513.88 : An01g07730, An09g02340, An01g14410, A. oryzae RIB40 : AO090012000320, Neosartorya fischeri NRRL 181 : NFIA_090560 and Aspergillus wentii : Aspwe1_0175772
Small-scale	SNP	scf_000002_A_fumigatus_A1163	4039933	4039934	C->T	Y	AFUB_031030	4038906	4041389	NA	Ortholog(s) have role in amino acid transmembrane export from vacuole and integral component of fungal-type vacuolar membrane localization
Small-scale	SNP	scf_000002_A_fumigatus_A1163	4041509	4041510	C->T	Y	AFUB_031040	4041426	4042765	NA	Ortholog of Aspergillus fumigatus A1163 : AFUB_031040
Small-scale	SNP	scf_000002_A_fumigatus_A1163	4042350	4042351	G->T	Y	AFUB_031040	4041426	4042765	NA	Ortholog of Aspergillus fumigatus A1163 : AFUB_031040
Small-scale	SNP	scf_000002_A_fumigatus_A1163	4049799	4049800	C->A	Y	AFUB_031070	4048241	4049835	NA	Has domain(s) with predicted substrate-specific transmembrane transporter activity, transmembrane transporter activity, role in transmembrane transport and integral component of membrane, membrane localization
Small-scale	SNP	scf_000002_A_fumigatus_A1163	4066384	4066385	T->C	Y	AFUB_031170	4066197	4068874	NA	Has domain(s) with predicted FAD binding, oxidoreductase activity and role in metabolic process
Small-scale	SNP	scf_000002_A_fumigatus_A1163	4067493	4067494	A->G	Y	AFUB_031170	4066197	4068874	NA	Has domain(s) with predicted FAD binding, oxidoreductase activity and role in metabolic process
Small-scale	SNP	scf_000002_A_fumigatus_A1163	4068507	4068508	G->C	Y	AFUB_031170	4066197	4068874	NA	Has domain(s) with predicted FAD binding, oxidoreductase activity and role in metabolic process
Small-scale	SNP	scf_000002_A_fumigatus_A1163	4080513	4080514	G->A	Y	AFUB_031220	4080147	4081858	NA	Ortholog(s) have GTP binding, GTPase activity, role in hyphal growth, intracellular protein transport, retrograde transport, endosome to Golgi and Golgi membrane, cytosol, nucleus, spitzenkorper localization
Small-scale	SNP	scf_000002_A_fumigatus_A1163	4082833	4082834	G->A	Y	AFUB_031230	4082237	4084099	NA	Ortholog(s) have inositol phosphoceramide synthase regulator activity, role in inositolphosphoceramide metabolic process and inositol phosphoceramide synthase complex, integral component of Golgi membrane localization
Small-scale	SNP	scf_000002_A_fumigatus_A1163	4085179	4085180	A->G	Y	AFUB_031240	4084593	4089924	NA	Putative sulphite reductase
Small-scale	SNP	scf_000002_A_fumigatus_A1163	4089096	4089097	T->C	Y	AFUB_031240	4084593	4089924	NA	Putative sulphite reductase
Small-scale	SNP	scf_000002_A_fumigatus_A1163	4108127	4108128	G->A	Y	AFUB_031300	4107162	4111200	NA	Ortholog(s) have hercynylcysteine sulfoxide synthase, hercynylselenocysteine synthase, histidine N-methyltransferase activity
Small-scale	SNP	scf_000002_A_fumigatus_A1163	4108128	4108129	G->A	Y	AFUB_031300	4107162	4111200	NA	Ortholog(s) have hercynylcysteine sulfoxide synthase, hercynylselenocysteine synthase, histidine N-methyltransferase activity
Small-scale	SNP	scf_000002_A_fumigatus_A1163	4108536	4108537	C->T	Y	AFUB_031300	4107162	4111200	NA	Ortholog(s) have hercynylcysteine sulfoxide synthase, hercynylselenocysteine synthase, histidine N-methyltransferase activity
Small-scale	SNP	scf_000002_A_fumigatus_A1163	4110876	4110877	G->C	Y	AFUB_031300	4107162	4111200	NA	Ortholog(s) have hercynylcysteine sulfoxide synthase, hercynylselenocysteine synthase, histidine N-methyltransferase activity
Small-scale	SNP	scf_000002_A_fumigatus_A1163	4114929	4114930	T->C	Y	AFUB_031320	4114245	4116523	NA	Ortholog of A. nidulans FGSC A4 : AN2182, A. niger CBS 513.88 : An15g05910, Aspergillus wentii : Aspwe1_0039157, Aspergillus sydowii : Aspsy1_0139789 and Aspergillus terreus NIH2624 : ATET_02443
Small-scale	SNP	scf_000002_A_fumigatus_A1163	4115141	4115142	T->C	Y	AFUB_031320	4114245	4116523	NA	Ortholog of A. nidulans FGSC A4 : AN2182, A. niger CBS 513.88 : An15g05910, Aspergillus wentii : Aspwe1_0039157, Aspergillus sydowii : Aspsy1_0139789 and Aspergillus terreus NIH2624 : ATET_02443
Small-scale	SNP	scf_000002_A_fumigatus_A1163	4117493	4117494	T->A	Y	AFUB_031330	4117062	4117856	NA	Ortholog(s) have RNA polymerase II transcription factor activity, TBP-class protein binding, involved in preinitiation complex assembly, TBP-class protein binding activity
Small-scale	SNP	scf_000002_A_fumigatus_A1163	4127241	4127242	G->A	Y	AFUB_031370	4126632	4127804	NA	Ortholog of A. nidulans FGSC A4 : AN10270, A. niger CBS 513.88 : An15g05970, A. oryzae RIB40 : AO090012000253, Neosartorya fischeri NRRL 181 : NFIA_090950 and Aspergillus wentii : Aspwe1_0182342
Small-scale	SNP	scf_000002_A_fumigatus_A1163	4138763	4138764	T->C	Y	AFUB_031410	4136640	4140466	ubaA	Ortholog(s) have ATP binding, magnesium ion binding, ubiquitin activating enzyme activity, role in protein ubiquitination and cytosol, nucleus localization
Small-scale	SNP	scf_000002_A_fumigatus_A1163	4139588	4139589	G->A	Y	AFUB_031410	4136640	4140466	ubaA	Ortholog(s) have ATP binding, magnesium ion binding, ubiquitin activating enzyme activity, role in protein ubiquitination and cytosol, nucleus localization
Small-scale	SNP	scf_000002_A_fumigatus_A1163	4140742	4140743	A->C	Y	AFUB_031420	4140601	4142113	gto1	Ortholog(s) have glutathione transferase activity
Small-scale	SNP	scf_000002_A_fumigatus_A1163	4145038	4145039	A->G	Y	AFUB_031430	4142696	4145139	NA	Ortholog(s) have mitochondrion localization
Small-scale	SNP	scf_000002_A_fumigatus_A1163	4145390	4145391	G->A	Y	AFUB_031440	4145258	4146621	NA	Ortholog(s) have cyclin-dependent protein serine/threonine kinase regulator activity
Small-scale	SNP	scf_000002_A_fumigatus_A1163	4145441	4145442	T->G	Y	AFUB_031440	4145258	4146621	NA	Ortholog(s) have cyclin-dependent protein serine/threonine kinase regulator activity
Small-scale	SNP	scf_000002_A_fumigatus_A1163	4149969	4149970	T->C	Y	AFUB_031450	4149774	4152184	NA	Ortholog of A. nidulans AN2171
Small-scale	SNP	scf_000002_A_fumigatus_A1163	4153461	4153462	G->C	Y	AFUB_031460	4152887	4153482	NA	Ortholog of A. nidulans FGSC A4 : AN12198, A. niger CBS 513.88 : An15g06100, Aspergillus wentii : Aspwe1_0026874 and Aspergillus sydowii : Aspsy1_0026968
Small-scale	SNP	scf_000002_A_fumigatus_A1163	4162718	4162719	G->A	Y	AFUB_031520	4162678	4164291	NA	Ortholog of A. nidulans FGSC A4 : AN2165/llmA, A. niger CBS 513.88 : An15g06160, A. oryzae RIB40 : AO090012000226, Aspergillus wentii : Aspwe1_0050672 and Aspergillus sydowii : Aspsy1_0054382
Small-scale	SNP	scf_000002_A_fumigatus_A1163	4166223	4166224	T->A	Y	AFUB_031530	4165878	4169486	NA	Ortholog(s) have cytosol, nuclear envelope localization
Small-scale	SNP	scf_000002_A_fumigatus_A1163	4175739	4175740	G->A	Y	AFUB_031550	4174830	4177979	NA	Has domain(s) with predicted zinc ion binding activity
Small-scale	SNP	scf_000002_A_fumigatus_A1163	4177232	4177233	A->C	Y	AFUB_031550	4174830	4177979	NA	Has domain(s) with predicted zinc ion binding activity
Small-scale	SNP	scf_000002_A_fumigatus_A1163	4180679	4180680	T->C	Y	AFUB_031570	4180524	4182042	NA	Ortholog of A. nidulans FGSC A4 : AN2160, A. niger CBS 513.88 : An15g06220, A. oryzae RIB40 : AO090012000216, Aspergillus wentii : Aspwe1_0170981 and Aspergillus sydowii : Aspsy1_0084996
Small-scale	SNP	scf_000002_A_fumigatus_A1163	4182668	4182669	G->A	Y	AFUB_031580	4182275	4184746	NA	Ortholog(s) have alpha-1,6-mannosyltransferase activity, role in protein N-linked glycosylation and alpha-1,6-mannosyltransferase complex, endoplasmic reticulum localization
Small-scale	SNP	scf_000002_A_fumigatus_A1163	4182670	4182671	G->T	Y	AFUB_031580	4182275	4184746	NA	Ortholog(s) have alpha-1,6-mannosyltransferase activity, role in protein N-linked glycosylation and alpha-1,6-mannosyltransferase complex, endoplasmic reticulum localization
Small-scale	SNP	scf_000002_A_fumigatus_A1163	4184938	4184939	G->A	Y	AFUB_031590	4184891	4186653	NA	Has domain(s) with predicted oxidoreductase activity and role in metabolic process
Small-scale	SNP	scf_000002_A_fumigatus_A1163	4186252	4186253	T->C	Y	AFUB_031590	4184891	4186653	NA	Has domain(s) with predicted oxidoreductase activity and role in metabolic process
Small-scale	SNP	scf_000002_A_fumigatus_A1163	4190407	4190408	C->T	Y	AFUB_031620	4189774	4191111	NA	Cofactor for methionyl-and glutamyl-tRNA synthetases
Small-scale	SNP	scf_000002_A_fumigatus_A1163	4199178	4199179	C->T	Y	AFUB_031650	4197063	4200925	NA	Phosphatidylethanolamine N-methyltransferase
Small-scale	SNP	scf_000002_A_fumigatus_A1163	4204161	4204162	T->C	Y	AFUB_031670	4203812	4204398	NA	Ortholog of A. nidulans FGSC A4 : AN2152, AN0341, A. fumigatus Af293 : Afu1g02260, A. niger CBS 513.88 : An01g06000 and Aspergillus wentii : Aspwe1_0025648, Aspwe1_0026895
Small-scale	SNP	scf_000002_A_fumigatus_A1163	4216948	4216949	A->G	Y	AFUB_031710	4214564	4217441	NA	Ortholog(s) have protein binding, bridging, protein complex binding activity and role in premeiotic DNA replication, regulation of protein ubiquitination involved in ubiquitin-dependent protein catabolic process
Small-scale	SNP	scf_000002_A_fumigatus_A1163	4222724	4222725	G->A	Y	AFUB_031720	4217709	4223304	NA	Ortholog(s) have nucleolus localization
Small-scale	SNP	scf_000002_A_fumigatus_A1163	4225862	4225863	G->T	Y	AFUB_031740	4225701	4227564	NA	Ortholog of A. nidulans FGSC A4 : AN2145, A. fumigatus Af293 : Afu4g14200, A. niger CBS 513.88 : An13g01980, An15g06410, An02g04730 and A. oryzae RIB40 : AO090026000400, AO090012001029
Small-scale	SNP	scf_000002_A_fumigatus_A1163	4226243	4226244	C->T	Y	AFUB_031740	4225701	4227564	NA	Ortholog of A. nidulans FGSC A4 : AN2145, A. fumigatus Af293 : Afu4g14200, A. niger CBS 513.88 : An13g01980, An15g06410, An02g04730 and A. oryzae RIB40 : AO090026000400, AO090012001029
Small-scale	SNP	scf_000002_A_fumigatus_A1163	4228194	4228195	C->G	Y	AFUB_031750	4228077	4229144	NA	Ortholog(s) have cytosol, nucleus localization
Small-scale	SNP	scf_000002_A_fumigatus_A1163	4228425	4228426	A->G	Y	AFUB_031750	4228077	4229144	NA	Ortholog(s) have cytosol, nucleus localization
Small-scale	SNP	scf_000002_A_fumigatus_A1163	4229818	4229819	G->C	Y	AFUB_031760	4229794	4234388	NA	Ortholog(s) have role in mitotic sister chromatid cohesion and mating-type region heterochromatin, nuclear mitotic cohesin complex, nuclear pericentric heterochromatin, nuclear subtelomeric heterochromatin localization
Small-scale	SNP	scf_000002_A_fumigatus_A1163	4240318	4240319	C->T	Y	AFUB_031790	4240136	4240795	NA	Ortholog of Aspergillus flavus NRRL 3357 : AFL2T_03117 and Aspergillus fumigatus A1163 : AFUB_031790
Small-scale	SNP	scf_000002_A_fumigatus_A1163	4246212	4246213	A->G	Y	AFUB_031820	4244793	4249006	NA	Ortholog(s) have cytosol localization
Small-scale	SNP	scf_000002_A_fumigatus_A1163	4251322	4251323	C->T	Y	AFUB_031830	4250020	4252498	NA	Has domain(s) with predicted nucleus localization
Small-scale	SNP	scf_000002_A_fumigatus_A1163	4256668	4256669	A->T	Y	AFUB_031840	4255429	4259126	NA	Has domain(s) with predicted RNA polymerase II transcription factor activity, sequence-specific DNA binding, zinc ion binding activity, role in regulation of transcription, DNA-templated and nucleus localization
Small-scale	SNP	scf_000002_A_fumigatus_A1163	4256890	4256891	C->T	Y	AFUB_031840	4255429	4259126	NA	Has domain(s) with predicted RNA polymerase II transcription factor activity, sequence-specific DNA binding, zinc ion binding activity, role in regulation of transcription, DNA-templated and nucleus localization
Small-scale	SNP	scf_000002_A_fumigatus_A1163	4262581	4262582	T->C	Y	AFUB_031860	4262525	4263942	NA	Ortholog of A. oryzae RIB40 : AO090012000180, Aspergillus wentii : Aspwe1_0026915, Aspergillus terreus NIH2624 : ATET_02325 and Aspergillus carbonarius ITEM 5010 : Acar5010_211034
Small-scale	SNP	scf_000002_A_fumigatus_A1163	4262628	4262629	T->C	Y	AFUB_031860	4262525	4263942	NA	Ortholog of A. oryzae RIB40 : AO090012000180, Aspergillus wentii : Aspwe1_0026915, Aspergillus terreus NIH2624 : ATET_02325 and Aspergillus carbonarius ITEM 5010 : Acar5010_211034
Small-scale	SNP	scf_000002_A_fumigatus_A1163	4267101	4267102	A->C	Y	AFUB_031890	4266017	4267327	NA	Ortholog(s) have fluoride transmembrane transporter activity, role in fluoride transmembrane transport and endoplasmic reticulum, plasma membrane localization
Small-scale	SNP	scf_000002_A_fumigatus_A1163	4267102	4267103	A->G	Y	AFUB_031890	4266017	4267327	NA	Ortholog(s) have fluoride transmembrane transporter activity, role in fluoride transmembrane transport and endoplasmic reticulum, plasma membrane localization
Small-scale	SNP	scf_000002_A_fumigatus_A1163	4269126	4269127	C->A	Y	AFUB_031910	4268458	4271031	NA	Has domain(s) with predicted DNA binding, nucleic acid binding, zinc ion binding activity, role in transcription, DNA-templated and nucleus localization
Small-scale	SNP	scf_000002_A_fumigatus_A1163	4269690	4269691	A->G	Y	AFUB_031910	4268458	4271031	NA	Has domain(s) with predicted DNA binding, nucleic acid binding, zinc ion binding activity, role in transcription, DNA-templated and nucleus localization
Small-scale	SNP	scf_000002_A_fumigatus_A1163	4284168	4284169	C->A	Y	AFUB_031920	4282927	4286818	NA	Ortholog(s) have Ras guanyl-nucleotide exchange factor activity
Small-scale	SNP	scf_000002_A_fumigatus_A1163	4286429	4286430	T->C	Y	AFUB_031920	4282927	4286818	NA	Ortholog(s) have Ras guanyl-nucleotide exchange factor activity
Small-scale	SNP	scf_000002_A_fumigatus_A1163	4293415	4293416	C->T	Y	AFUB_031950	4293313	4295355	NA	Ortholog(s) have role in mitochondrial translation and mitochondrion localization
Small-scale	SNP	scf_000002_A_fumigatus_A1163	4297432	4297433	A->G	Y	AFUB_031960	4295631	4297662	NA	Ortholog(s) have endoplasmic reticulum localization
Small-scale	SNP	scf_000002_A_fumigatus_A1163	4301339	4301340	G->A	Y	AFUB_031980	4301074	4303916	NA	Putative fungal-specific transcription factor
Small-scale	SNP	scf_000002_A_fumigatus_A1163	4302435	4302436	C->T	Y	AFUB_031980	4301074	4303916	NA	Putative fungal-specific transcription factor
Small-scale	SNP	scf_000002_A_fumigatus_A1163	4303257	4303258	A->G	Y	AFUB_031980	4301074	4303916	NA	Putative fungal-specific transcription factor
Small-scale	SNP	scf_000002_A_fumigatus_A1163	4304580	4304581	T->G	Y	AFUB_031990	4304356	4306301	NA	Putative MFS multidrug transporter
Small-scale	SNP	scf_000002_A_fumigatus_A1163	4305495	4305496	C->T	Y	AFUB_031990	4304356	4306301	NA	Putative MFS multidrug transporter
Small-scale	SNP	scf_000002_A_fumigatus_A1163	4315361	4315362	A->G	Y	AFUB_032030	4314904	4316766	NA	Ortholog(s) have 2,5-diamino-6-ribitylamino-4(3H)-pyrimidinone 5'-phosphate deaminase activity, pseudouridine synthase activity, role in riboflavin biosynthetic process, tRNA pseudouridine synthesis and cytosol localization
Small-scale	SNP	scf_000002_A_fumigatus_A1163	4318097	4318098	G->T	Y	AFUB_032040	4316835	4318113	NA	60S ribosomal protein L32
Small-scale	SNP	scf_000002_A_fumigatus_A1163	4326884	4326885	C->T	Y	AFUB_032080	4325771	4327030	NA	Ortholog of A. nidulans FGSC A4 : AN7347, Aspergillus wentii : Aspwe1_0039276, Aspergillus versicolor : Aspve1_0038665, Aspergillus clavatus NRRL 1 : ACLA_075330 and Aspergillus zonatus : Aspzo1_0156160
Small-scale	SNP	scf_000002_A_fumigatus_A1163	4328114	4328115	A->G	Y	AFUB_032090	4327679	4337011	NA	Ortholog of A. nidulans FGSC A4 : AN7348, A. niger CBS 513.88 : An15g06820, A. oryzae RIB40 : AO090102000221, Aspergillus wentii : Aspwe1_0108539 and Aspergillus sydowii : Aspsy1_0027034
Small-scale	SNP	scf_000002_A_fumigatus_A1163	4330722	4330723	T->C	Y	AFUB_032090	4327679	4337011	NA	Ortholog of A. nidulans FGSC A4 : AN7348, A. niger CBS 513.88 : An15g06820, A. oryzae RIB40 : AO090102000221, Aspergillus wentii : Aspwe1_0108539 and Aspergillus sydowii : Aspsy1_0027034
Small-scale	SNP	scf_000002_A_fumigatus_A1163	4330805	4330806	G->C	Y	AFUB_032090	4327679	4337011	NA	Ortholog of A. nidulans FGSC A4 : AN7348, A. niger CBS 513.88 : An15g06820, A. oryzae RIB40 : AO090102000221, Aspergillus wentii : Aspwe1_0108539 and Aspergillus sydowii : Aspsy1_0027034
Small-scale	SNP	scf_000002_A_fumigatus_A1163	4343157	4343158	G->A	Y	AFUB_032140	4342553	4346728	NA	Ortholog(s) have chromatin insulator sequence binding, transcription factor activity, core RNA polymerase III binding activity and role in transcription initiation from RNA polymerase III promoter
Small-scale	SNP	scf_000002_A_fumigatus_A1163	4346566	4346567	C->T	Y	AFUB_032140	4342553	4346728	NA	Ortholog(s) have chromatin insulator sequence binding, transcription factor activity, core RNA polymerase III binding activity and role in transcription initiation from RNA polymerase III promoter
Small-scale	SNP	scf_000002_A_fumigatus_A1163	4351969	4351970	G->A	Y	AFUB_032170	4350620	4353169	NA	Ortholog(s) have role in filamentous growth of a population of unicellular organisms, negative regulation of filamentous growth of a population of unicellular organisms
Small-scale	SNP	scf_000002_A_fumigatus_A1163	4352870	4352871	A->G	Y	AFUB_032170	4350620	4353169	NA	Ortholog(s) have role in filamentous growth of a population of unicellular organisms, negative regulation of filamentous growth of a population of unicellular organisms
Small-scale	SNP	scf_000002_A_fumigatus_A1163	4357460	4357461	A->G	Y	AFUB_032190	4355899	4359058	NA	Ortholog of A. nidulans FGSC A4 : AN7335, A. niger CBS 513.88 : An15g06990, A. oryzae RIB40 : AO090102000205, Aspergillus wentii : Aspwe1_0460265 and Aspergillus sydowii : Aspsy1_0169307
Small-scale	SNP	scf_000002_A_fumigatus_A1163	4360374	4360375	G->T	Y	AFUB_032200	4359067	4363636	pld2	Putative phospholipase D
Small-scale	SNP	scf_000002_A_fumigatus_A1163	4360375	4360376	T->G	Y	AFUB_032200	4359067	4363636	pld2	Putative phospholipase D
Small-scale	SNP	scf_000002_A_fumigatus_A1163	4363244	4363245	G->A	Y	AFUB_032200	4359067	4363636	pld2	Putative phospholipase D
Small-scale	SNP	scf_000002_A_fumigatus_A1163	4363372	4363373	C->T	Y	AFUB_032200	4359067	4363636	pld2	Putative phospholipase D
Small-scale	SNP	scf_000002_A_fumigatus_A1163	4373162	4373163	G->A	Y	AFUB_032250	4373110	4374377	NA	Has domain(s) with predicted oxidoreductase activity and role in metabolic process
Small-scale	SNP	scf_000002_A_fumigatus_A1163	4387862	4387863	T->C	Y	AFUB_032300	4387723	4390723	NA	Ortholog(s) have eukaryotic translation initiation factor 2alpha kinase activity
Small-scale	SNP	scf_000002_A_fumigatus_A1163	4388047	4388048	C->A	Y	AFUB_032300	4387723	4390723	NA	Ortholog(s) have eukaryotic translation initiation factor 2alpha kinase activity
Small-scale	SNP	scf_000002_A_fumigatus_A1163	4392779	4392780	T->C	Y	AFUB_032310	4390968	4392820	NA	Has domain(s) with predicted acyl-CoA dehydrogenase activity, flavin adenine dinucleotide binding, oxidoreductase activity, acting on the CH-CH group of donors activity and role in oxidation-reduction process
Small-scale	SNP	scf_000002_A_fumigatus_A1163	4406750	4406751	T->C	Y	AFUB_032360	4405275	4407149	NA	Ortholog(s) have cytoplasm localization
Small-scale	SNP	scf_000002_A_fumigatus_A1163	4407326	4407327	T->C	Y	AFUB_032370	4407252	4408644	NA	Ortholog(s) have single-stranded DNA binding, single-stranded DNA-dependent ATPase activity, ubiquitin protein ligase activity
Small-scale	SNP	scf_000002_A_fumigatus_A1163	4409517	4409518	C->T	Y	AFUB_032380	4408890	4410710	NA	Has domain(s) with predicted role in DNA replication and nucleus localization
Small-scale	SNP	scf_000002_A_fumigatus_A1163	4411521	4411522	C->T	Y	AFUB_032390	4411224	4412974	NA	Ortholog(s) have endoplasmic reticulum, extracellular region localization
Small-scale	SNP	scf_000002_A_fumigatus_A1163	4412096	4412097	G->A	Y	AFUB_032390	4411224	4412974	NA	Ortholog(s) have endoplasmic reticulum, extracellular region localization
Small-scale	SNP	scf_000002_A_fumigatus_A1163	4412601	4412602	C->T	Y	AFUB_032390	4411224	4412974	NA	Ortholog(s) have endoplasmic reticulum, extracellular region localization
Small-scale	SNP	scf_000002_A_fumigatus_A1163	4413817	4413818	T->C	Y	AFUB_032400	4413187	4414706	pex12	Ortholog(s) have ubiquitin-protein transferase activity, role in protein import into peroxisome matrix, protein monoubiquitination and integral component of peroxisomal membrane, peroxisomal importomer complex localization
Small-scale	SNP	scf_000002_A_fumigatus_A1163	4415746	4415747	A->C	Y	AFUB_032410	4414862	4417110	NA	Ortholog of A. nidulans FGSC A4 : AN10923, A. niger CBS 513.88 : An04g08750, Neosartorya fischeri NRRL 181 : NFIA_092040, Aspergillus clavatus NRRL 1 : ACLA_075650 and Aspergillus zonatus : Aspzo1_0127291
Small-scale	SNP	scf_000002_A_fumigatus_A1163	4415981	4415982	C->T	Y	AFUB_032410	4414862	4417110	NA	Ortholog of A. nidulans FGSC A4 : AN10923, A. niger CBS 513.88 : An04g08750, Neosartorya fischeri NRRL 181 : NFIA_092040, Aspergillus clavatus NRRL 1 : ACLA_075650 and Aspergillus zonatus : Aspzo1_0127291
Small-scale	SNP	scf_000002_A_fumigatus_A1163	4417762	4417763	G->A	Y	AFUB_032420	4417223	4419218	NA	Putative nonsense-mediated mRNA decay protein
Small-scale	SNP	scf_000002_A_fumigatus_A1163	4418947	4418948	G->A	Y	AFUB_032420	4417223	4419218	NA	Putative nonsense-mediated mRNA decay protein
Small-scale	SNP	scf_000002_A_fumigatus_A1163	4420222	4420223	G->C	Y	AFUB_032430	4419281	4420540	NA	Ortholog(s) have nucleolus localization
Small-scale	SNP	scf_000002_A_fumigatus_A1163	4420299	4420300	G->C	Y	AFUB_032430	4419281	4420540	NA	Ortholog(s) have nucleolus localization
Small-scale	SNP	scf_000002_A_fumigatus_A1163	4424618	4424619	T->C	Y	AFUB_032450	4423187	4426403	NA	Ortholog(s) have role in chromatin silencing at telomere, negative regulation of transcription from RNA polymerase II promoter by pheromones and CHRAC localization
Small-scale	SNP	scf_000002_A_fumigatus_A1163	4433694	4433695	A->G	Y	AFUB_032470	4431329	4433754	NA	Ortholog(s) have role in ER to Golgi vesicle-mediated transport and ER to Golgi transport vesicle, fungal-type vacuole membrane, integral component of Golgi membrane, integral component of endoplasmic reticulum membrane localization
Small-scale	SNP	scf_000002_A_fumigatus_A1163	4433728	4433729	A->T	Y	AFUB_032470	4431329	4433754	NA	Ortholog(s) have role in ER to Golgi vesicle-mediated transport and ER to Golgi transport vesicle, fungal-type vacuole membrane, integral component of Golgi membrane, integral component of endoplasmic reticulum membrane localization
Small-scale	SNP	scf_000002_A_fumigatus_A1163	4434997	4434998	T->C	Y	AFUB_032480	4434406	4437340	NA	Has domain(s) with predicted zinc ion binding activity
Small-scale	SNP	scf_000002_A_fumigatus_A1163	4436755	4436756	A->G	Y	AFUB_032480	4434406	4437340	NA	Has domain(s) with predicted zinc ion binding activity
Small-scale	SNP	scf_000002_A_fumigatus_A1163	4444829	4444830	G->C	Y	AFUB_032510	4444569	4448414	NA	Ortholog(s) have role in positive regulation of cell-substrate adhesion and regulation of glucose import by regulation of transcription from RNA polymerase II promoter, more
Small-scale	SNP	scf_000002_A_fumigatus_A1163	4454502	4454503	T->C	Y	AFUB_032530	4452823	4458234	NA	Ortholog(s) have role in DNA repair, attachment of spindle microtubules to kinetochore involved in homologous chromosome segregation, mitotic sister chromatid cohesion and protein localization to chromatin, more
Small-scale	SNP	scf_000002_A_fumigatus_A1163	4462650	4462651	G->A	Y	AFUB_032550	4461866	4464253	NA	Ortholog(s) have cytosol, nucleus localization
Small-scale	SNP	scf_000002_A_fumigatus_A1163	4465324	4465325	C->T	Y	AFUB_032560	4464824	4465918	NA	60S ribosomal protein L37a
Small-scale	SNP	scf_000002_A_fumigatus_A1163	4476231	4476232	T->G	Y	AFUB_032610	4474042	4476246	NA	Ortholog(s) have succinate:fumarate antiporter activity, role in acetate catabolic process, carbon utilization, fatty acid catabolic process, fumarate transport, succinate transport and mitochondrion, plasma membrane localization
Small-scale	SNP	scf_000002_A_fumigatus_A1163	4482094	4482095	T->C	Y	AFUB_032640	4481218	4483111	NA	Ortholog(s) have 3'-5'-exoribonuclease activity and role in RNA phosphodiester bond hydrolysis, exonucleolytic, heterochromatin assembly involved in chromatin silencing by small RNA, ncRNA 3'-end processing
Small-scale	SNP	scf_000002_A_fumigatus_A1163	4483688	4483689	A->G	Y	AFUB_032650	4483603	4484743	NA	Ortholog(s) have structural constituent of ribosome activity and mitochondrial large ribosomal subunit localization
Small-scale	SNP	scf_000002_A_fumigatus_A1163	4498476	4498477	G->A	Y	AFUB_032690	4492879	4499639	NA	Ortholog of A. nidulans FGSC A4 : AN5649, AN1674, AN0384, AN1268, AN7262, A. fumigatus Af293 : Afu1g01700, Afu4g08730, Afu4g13630, Afu1g10012 and A. niger CBS 513.88 : An01g09380, An01g06520, An04g09080, An04g03600
Small-scale	SNP	scf_000002_A_fumigatus_A1163	4501674	4501675	G->A	Y	AFUB_032700	4500794	4503804	NA	Ortholog of A. nidulans FGSC A4 : AN7261, A. niger CBS 513.88 : An04g09090, A. oryzae RIB40 : AO090102000116, Aspergillus sydowii : Aspsy1_0194260 and Aspergillus terreus NIH2624 : ATET_10041
Small-scale	SNP	scf_000002_A_fumigatus_A1163	4502767	4502768	G->A	Y	AFUB_032700	4500794	4503804	NA	Ortholog of A. nidulans FGSC A4 : AN7261, A. niger CBS 513.88 : An04g09090, A. oryzae RIB40 : AO090102000116, Aspergillus sydowii : Aspsy1_0194260 and Aspergillus terreus NIH2624 : ATET_10041
Small-scale	SNP	scf_000002_A_fumigatus_A1163	4502862	4502863	C->T	Y	AFUB_032700	4500794	4503804	NA	Ortholog of A. nidulans FGSC A4 : AN7261, A. niger CBS 513.88 : An04g09090, A. oryzae RIB40 : AO090102000116, Aspergillus sydowii : Aspsy1_0194260 and Aspergillus terreus NIH2624 : ATET_10041
Small-scale	SNP	scf_000002_A_fumigatus_A1163	4519029	4519030	C->T	Y	AFUB_032770	4516072	4519119	cdc48	Putative cell division control protein
Small-scale	SNP	scf_000002_A_fumigatus_A1163	4525212	4525213	C->T	Y	AFUB_032790	4522577	4525432	NA	Ortholog(s) have role in cellular response to nitrogen starvation and pheromone-dependent signal transduction involved in conjugation with cellular fusion, more
Small-scale	SNP	scf_000002_A_fumigatus_A1163	4525213	4525214	T->C	Y	AFUB_032790	4522577	4525432	NA	Ortholog(s) have role in cellular response to nitrogen starvation and pheromone-dependent signal transduction involved in conjugation with cellular fusion, more
Small-scale	SNP	scf_000002_A_fumigatus_A1163	4527612	4527613	C->T	Y	AFUB_032800	4526548	4529426	NA	protein of unknown function
Small-scale	SNP	scf_000002_A_fumigatus_A1163	4528037	4528038	C->A	Y	AFUB_032800	4526548	4529426	NA	protein of unknown function
Small-scale	SNP	scf_000002_A_fumigatus_A1163	4528706	4528707	A->G	Y	AFUB_032800	4526548	4529426	NA	protein of unknown function
Small-scale	SNP	scf_000002_A_fumigatus_A1163	4529330	4529331	T->C	Y	AFUB_032800	4526548	4529426	NA	protein of unknown function
Small-scale	SNP	scf_000002_A_fumigatus_A1163	4534608	4534609	A->G	Y	AFUB_032820	4534334	4538860	NA	Ortholog(s) have potassium:proton antiporter activity, sodium:proton antiporter activity
Small-scale	SNP	scf_000002_A_fumigatus_A1163	4542477	4542478	C->A	Y	AFUB_032830	4539587	4542858	NA	Ortholog(s) have Golgi apparatus, fungal-type vacuole membrane localization
Small-scale	SNP	scf_000002_A_fumigatus_A1163	4549217	4549218	A->G	Y	AFUB_032850	4546839	4550018	NA	Ortholog of A. nidulans FGSC A4 : AN7248, A. niger CBS 513.88 : An04g09270, A. oryzae RIB40 : AO090102000099, Aspergillus wentii : Aspwe1_0153703 and Aspergillus sydowii : Aspsy1_0140330
Small-scale	SNP	scf_000002_A_fumigatus_A1163	4549891	4549892	C->A	Y	AFUB_032850	4546839	4550018	NA	Ortholog of A. nidulans FGSC A4 : AN7248, A. niger CBS 513.88 : An04g09270, A. oryzae RIB40 : AO090102000099, Aspergillus wentii : Aspwe1_0153703 and Aspergillus sydowii : Aspsy1_0140330
Small-scale	SNP	scf_000002_A_fumigatus_A1163	4551028	4551029	C->T	Y	AFUB_032860	4550371	4553501	NA	Ortholog of Aspergillus fumigatus A1163 : AFUB_032860
Small-scale	SNP	scf_000002_A_fumigatus_A1163	4551119	4551120	G->A	Y	AFUB_032860	4550371	4553501	NA	Ortholog of Aspergillus fumigatus A1163 : AFUB_032860
Small-scale	SNP	scf_000002_A_fumigatus_A1163	4551208	4551209	A->G	Y	AFUB_032860	4550371	4553501	NA	Ortholog of Aspergillus fumigatus A1163 : AFUB_032860
Small-scale	SNP	scf_000002_A_fumigatus_A1163	4551354	4551355	T->G	Y	AFUB_032860	4550371	4553501	NA	Ortholog of Aspergillus fumigatus A1163 : AFUB_032860
Small-scale	SNP	scf_000002_A_fumigatus_A1163	4551421	4551422	G->C	Y	AFUB_032860	4550371	4553501	NA	Ortholog of Aspergillus fumigatus A1163 : AFUB_032860
Small-scale	SNP	scf_000002_A_fumigatus_A1163	4552293	4552294	A->T	Y	AFUB_032860	4550371	4553501	NA	Ortholog of Aspergillus fumigatus A1163 : AFUB_032860
Small-scale	SNP	scf_000002_A_fumigatus_A1163	4553110	4553111	C->G	Y	AFUB_032860	4550371	4553501	NA	Ortholog of Aspergillus fumigatus A1163 : AFUB_032860
Small-scale	SNP	scf_000002_A_fumigatus_A1163	4557567	4557568	A->T	Y	AFUB_032870	4555100	4560681	amdX	Ortholog(s) have sequence-specific DNA binding activity, role in regulation of transcription, DNA-templated and cytoplasm, nucleus localization
Small-scale	SNP	scf_000002_A_fumigatus_A1163	4564157	4564158	C->A	Y	AFUB_032880	4560986	4566961	NA	Ortholog of Neosartorya fischeri NRRL 181 : NFIA_092610 and Aspergillus fumigatus A1163 : AFUB_032880
Small-scale	SNP	scf_000002_A_fumigatus_A1163	4565634	4565635	A->G	Y	AFUB_032880	4560986	4566961	NA	Ortholog of Neosartorya fischeri NRRL 181 : NFIA_092610 and Aspergillus fumigatus A1163 : AFUB_032880
Small-scale	SNP	scf_000002_A_fumigatus_A1163	4570158	4570159	T->G	Y	AFUB_032900	4569925	4570722	NA	Has domain(s) with predicted hydrolase activity
Small-scale	SNP	scf_000002_A_fumigatus_A1163	4570515	4570516	T->G	Y	AFUB_032900	4569925	4570722	NA	Has domain(s) with predicted hydrolase activity
Small-scale	SNP	scf_000002_A_fumigatus_A1163	4570759	4570760	G->A	Y	AFUB_032910	4570747	4571745	NA	Has domain(s) with predicted hydrolase activity
Small-scale	SNP	scf_000002_A_fumigatus_A1163	4580808	4580809	C->T	Y	AFUB_032960	4580617	4581184	NA	Ortholog of Aspergillus fumigatus A1163 : AFUB_032960
Small-scale	SNP	scf_000002_A_fumigatus_A1163	4581005	4581006	A->T	Y	AFUB_032960	4580617	4581184	NA	Ortholog of Aspergillus fumigatus A1163 : AFUB_032960
Small-scale	SNP	scf_000002_A_fumigatus_A1163	4581043	4581044	G->A	Y	AFUB_032960	4580617	4581184	NA	Ortholog of Aspergillus fumigatus A1163 : AFUB_032960
Small-scale	SNP	scf_000002_A_fumigatus_A1163	4581054	4581055	A->T	Y	AFUB_032960	4580617	4581184	NA	Ortholog of Aspergillus fumigatus A1163 : AFUB_032960
Small-scale	SNP	scf_000002_A_fumigatus_A1163	4595311	4595312	C->G	Y	AFUB_033010	4595299	4595884	NA	NA
Small-scale	SNP	scf_000002_A_fumigatus_A1163	4595613	4595614	C->A	Y	AFUB_033010	4595299	4595884	NA	NA
Small-scale	SNP	scf_000002_A_fumigatus_A1163	4595663	4595664	T->G	Y	AFUB_033010	4595299	4595884	NA	NA
Small-scale	SNP	scf_000002_A_fumigatus_A1163	4595680	4595681	T->C	Y	AFUB_033010	4595299	4595884	NA	NA
Small-scale	SNP	scf_000002_A_fumigatus_A1163	4596277	4596278	G->C	Y	AFUB_033020	4596253	4596447	NA	NA
Small-scale	SNP	scf_000002_A_fumigatus_A1163	4599098	4599099	A->G	Y	AFUB_033040	4599033	4599802	NA	Ortholog of Neosartorya fischeri NRRL 181 : NFIA_092780 and Aspergillus fumigatus A1163 : AFUB_033040
Small-scale	SNP	scf_000002_A_fumigatus_A1163	4600960	4600961	A->T	Y	AFUB_033050	4600945	4601451	NA	Ortholog of Aspergillus fumigatus A1163 : AFUB_033050
Small-scale	SNP	scf_000002_A_fumigatus_A1163	4600966	4600967	T->C	Y	AFUB_033050	4600945	4601451	NA	Ortholog of Aspergillus fumigatus A1163 : AFUB_033050
Small-scale	SNP	scf_000002_A_fumigatus_A1163	4601254	4601255	A->T	Y	AFUB_033050	4600945	4601451	NA	Ortholog of Aspergillus fumigatus A1163 : AFUB_033050
Small-scale	SNP	scf_000002_A_fumigatus_A1163	4601349	4601350	C->A	Y	AFUB_033050	4600945	4601451	NA	Ortholog of Aspergillus fumigatus A1163 : AFUB_033050
Small-scale	SNP	scf_000002_A_fumigatus_A1163	4602239	4602240	T->G	Y	AFUB_033060	4601792	4604435	NA	Ortholog of Neosartorya fischeri NRRL 181 : NFIA_092800, Aspergillus fumigatus A1163 : AFUB_033060 and Aspergillus terreus NIH2624 : ATET_10166
Small-scale	SNP	scf_000002_A_fumigatus_A1163	4602281	4602282	T->C	Y	AFUB_033060	4601792	4604435	NA	Ortholog of Neosartorya fischeri NRRL 181 : NFIA_092800, Aspergillus fumigatus A1163 : AFUB_033060 and Aspergillus terreus NIH2624 : ATET_10166
Small-scale	SNP	scf_000002_A_fumigatus_A1163	4602965	4602966	T->G	Y	AFUB_033060	4601792	4604435	NA	Ortholog of Neosartorya fischeri NRRL 181 : NFIA_092800, Aspergillus fumigatus A1163 : AFUB_033060 and Aspergillus terreus NIH2624 : ATET_10166
Small-scale	SNP	scf_000002_A_fumigatus_A1163	4602994	4602995	G->A	Y	AFUB_033060	4601792	4604435	NA	Ortholog of Neosartorya fischeri NRRL 181 : NFIA_092800, Aspergillus fumigatus A1163 : AFUB_033060 and Aspergillus terreus NIH2624 : ATET_10166
Small-scale	SNP	scf_000002_A_fumigatus_A1163	4611376	4611377	C->T	Y	AFUB_033100	4610443	4611709	NA	Ortholog(s) have nitronate monooxygenase activity and role in denitrification pathway, detoxification of nitrogen compound
Small-scale	SNP	scf_000002_A_fumigatus_A1163	4611392	4611393	T->G	Y	AFUB_033100	4610443	4611709	NA	Ortholog(s) have nitronate monooxygenase activity and role in denitrification pathway, detoxification of nitrogen compound
Small-scale	SNP	scf_000002_A_fumigatus_A1163	4611630	4611631	G->A	Y	AFUB_033100	4610443	4611709	NA	Ortholog(s) have nitronate monooxygenase activity and role in denitrification pathway, detoxification of nitrogen compound
Small-scale	SNP	scf_000002_A_fumigatus_A1163	4612059	4612060	G->T	Y	AFUB_033110	4612006	4613205	NA	Ortholog(s) have role in F-9775A biosynthetic process, F-9775B biosynthetic process
Small-scale	SNP	scf_000002_A_fumigatus_A1163	4612576	4612577	G->T	Y	AFUB_033110	4612006	4613205	NA	Ortholog(s) have role in F-9775A biosynthetic process, F-9775B biosynthetic process
Small-scale	SNP	scf_000002_A_fumigatus_A1163	4622025	4622026	C->T	Y	AFUB_033160	4621602	4623352	NA	Ortholog of A. nidulans FGSC A4 : AN2821, A. fumigatus Af293 : Afu2g00180, A. niger CBS 513.88 : An03g05360, An04g09420 and A. oryzae RIB40 : AO090102000063, AO090009000716
Small-scale	SNP	scf_000002_A_fumigatus_A1163	4622387	4622388	T->C	Y	AFUB_033160	4621602	4623352	NA	Ortholog of A. nidulans FGSC A4 : AN2821, A. fumigatus Af293 : Afu2g00180, A. niger CBS 513.88 : An03g05360, An04g09420 and A. oryzae RIB40 : AO090102000063, AO090009000716
Small-scale	SNP	scf_000002_A_fumigatus_A1163	4624982	4624983	A->C	Y	AFUB_033180	4624419	4626440	NA	Ortholog of A. nidulans FGSC A4 : AN1877, AN7228, A. niger CBS 513.88 : An04g09550, A. oryzae RIB40 : AO090102000061 and Neosartorya fischeri NRRL 181 : NFIA_092910
Small-scale	SNP	scf_000002_A_fumigatus_A1163	4625021	4625022	A->T	Y	AFUB_033180	4624419	4626440	NA	Ortholog of A. nidulans FGSC A4 : AN1877, AN7228, A. niger CBS 513.88 : An04g09550, A. oryzae RIB40 : AO090102000061 and Neosartorya fischeri NRRL 181 : NFIA_092910
Small-scale	SNP	scf_000002_A_fumigatus_A1163	4625508	4625509	C->G	Y	AFUB_033180	4624419	4626440	NA	Ortholog of A. nidulans FGSC A4 : AN1877, AN7228, A. niger CBS 513.88 : An04g09550, A. oryzae RIB40 : AO090102000061 and Neosartorya fischeri NRRL 181 : NFIA_092910
Small-scale	SNP	scf_000002_A_fumigatus_A1163	4625863	4625864	A->G	Y	AFUB_033180	4624419	4626440	NA	Ortholog of A. nidulans FGSC A4 : AN1877, AN7228, A. niger CBS 513.88 : An04g09550, A. oryzae RIB40 : AO090102000061 and Neosartorya fischeri NRRL 181 : NFIA_092910
Small-scale	SNP	scf_000002_A_fumigatus_A1163	4630723	4630724	A->G	Y	AFUB_033200	4628581	4630941	NA	NA
Small-scale	SNP	scf_000002_A_fumigatus_A1163	4630916	4630917	C->T	Y	AFUB_033200	4628581	4630941	NA	NA
Small-scale	SNP	scf_000002_A_fumigatus_A1163	4632255	4632256	C->T	Y	AFUB_033210	4631960	4632622	NA	Ortholog of Neosartorya fischeri NRRL 181 : NFIA_092940, Aspergillus fumigatus A1163 : AFUB_033210, Aspergillus zonatus : Aspzo1_0135217 and Aspergillus terreus NIH2624 : ATET_09746
Small-scale	SNP	scf_000002_A_fumigatus_A1163	4632320	4632321	C->T	Y	AFUB_033210	4631960	4632622	NA	Ortholog of Neosartorya fischeri NRRL 181 : NFIA_092940, Aspergillus fumigatus A1163 : AFUB_033210, Aspergillus zonatus : Aspzo1_0135217 and Aspergillus terreus NIH2624 : ATET_09746
Small-scale	SNP	scf_000002_A_fumigatus_A1163	4637549	4637550	C->T	Y	AFUB_033230	4636766	4638859	abr1	Multicopper oxidase involved in conidial pigment biosynthesis
Small-scale	SNP	scf_000002_A_fumigatus_A1163	4639947	4639948	G->A	Y	AFUB_033240	4639278	4640697	ayg1	Conidial pigment biosynthesis protein with a role in polyketide shortening
Small-scale	SNP	scf_000002_A_fumigatus_A1163	4640689	4640690	T->G	Y	AFUB_033240	4639278	4640697	ayg1	Conidial pigment biosynthesis protein with a role in polyketide shortening
Small-scale	SNP	scf_000002_A_fumigatus_A1163	4641414	4641415	G->C	Y	AFUB_033250	4641261	4642355	arp2	1,3,6,8-tetrahydroxynaphthalene reductase involved in conidial pigment biosynthesis
Small-scale	SNP	scf_000002_A_fumigatus_A1163	4641633	4641634	G->A	Y	AFUB_033250	4641261	4642355	arp2	1,3,6,8-tetrahydroxynaphthalene reductase involved in conidial pigment biosynthesis
Small-scale	SNP	scf_000002_A_fumigatus_A1163	4659648	4659649	A->G	Y	AFUB_033310	4657409	4660361	NA	Putative cellobiose dehydrogenase CDH cytochrome superfamily, secreted
Small-scale	SNP	scf_000002_A_fumigatus_A1163	4663236	4663237	T->C	Y	AFUB_033330	4662808	4663970	NA	Ortholog of Aspergillus fumigatus A1163 : AFUB_033330
Small-scale	SNP	scf_000002_A_fumigatus_A1163	4665581	4665582	A->G	Y	AFUB_033340	4664044	4666132	NA	Ortholog of A. oryzae RIB40 : AO090038000415, Aspergillus flavus NRRL 3357 : AFL2T_07755, Neosartorya fischeri NRRL 181 : NFIA_093050 and Aspergillus fumigatus A1163 : AFUB_033340
Small-scale	SNP	scf_000002_A_fumigatus_A1163	4665764	4665765	G->A	Y	AFUB_033340	4664044	4666132	NA	Ortholog of A. oryzae RIB40 : AO090038000415, Aspergillus flavus NRRL 3357 : AFL2T_07755, Neosartorya fischeri NRRL 181 : NFIA_093050 and Aspergillus fumigatus A1163 : AFUB_033340
Small-scale	SNP	scf_000002_A_fumigatus_A1163	4665767	4665768	T->A	Y	AFUB_033340	4664044	4666132	NA	Ortholog of A. oryzae RIB40 : AO090038000415, Aspergillus flavus NRRL 3357 : AFL2T_07755, Neosartorya fischeri NRRL 181 : NFIA_093050 and Aspergillus fumigatus A1163 : AFUB_033340
Small-scale	SNP	scf_000002_A_fumigatus_A1163	4665836	4665837	C->G	Y	AFUB_033340	4664044	4666132	NA	Ortholog of A. oryzae RIB40 : AO090038000415, Aspergillus flavus NRRL 3357 : AFL2T_07755, Neosartorya fischeri NRRL 181 : NFIA_093050 and Aspergillus fumigatus A1163 : AFUB_033340
Small-scale	SNP	scf_000002_A_fumigatus_A1163	4666115	4666116	T->G	Y	AFUB_033340	4664044	4666132	NA	Ortholog of A. oryzae RIB40 : AO090038000415, Aspergillus flavus NRRL 3357 : AFL2T_07755, Neosartorya fischeri NRRL 181 : NFIA_093050 and Aspergillus fumigatus A1163 : AFUB_033340
Small-scale	SNP	scf_000002_A_fumigatus_A1163	4667247	4667248	A->C	Y	AFUB_033350	4666701	4667795	NA	Has domain(s) with predicted role in transmembrane transport and integral component of membrane localization
Small-scale	SNP	scf_000002_A_fumigatus_A1163	4671001	4671002	T->C	Y	AFUB_033380	4670972	4671192	NA	Ortholog of Aspergillus fumigatus A1163 : AFUB_033380
Small-scale	SNP	scf_000002_A_fumigatus_A1163	4675000	4675001	C->A	Y	AFUB_033400	4674622	4675095	NA	protein of unknown function
Small-scale	SNP	scf_000002_A_fumigatus_A1163	4676988	4676989	A->T	Y	AFUB_033410	4676626	4677860	NA	Ortholog of A. niger CBS 513.88 : An09g01050, A. oryzae RIB40 : AO090012000372, Neosartorya fischeri NRRL 181 : NFIA_093110 and Aspergillus wentii : Aspwe1_0731661
Small-scale	SNP	scf_000002_A_fumigatus_A1163	4679681	4679682	C->G	Y	AFUB_033430	4679156	4680700	NA	Has domain(s) with predicted role in transmembrane transport and integral component of membrane localization
Small-scale	SNP	scf_000002_A_fumigatus_A1163	4684002	4684003	A->G	Y	AFUB_033440	4683591	4684746	NA	Ortholog of A. nidulans FGSC A4 : AN10604, A. niger CBS 513.88 : An03g02870, Neosartorya fischeri NRRL 181 : NFIA_093160, Aspergillus wentii : Aspwe1_0141692 and Aspergillus versicolor : Aspve1_0070749
Small-scale	SNP	scf_000002_A_fumigatus_A1163	4689401	4689402	C->T	Y	AFUB_033460	4688508	4690427	NA	Ortholog of A. niger CBS 513.88 : An03g00640, Neosartorya fischeri NRRL 181 : NFIA_093190, Aspergillus niger ATCC 1015 : 194162-mRNA and Aspergillus zonatus : Aspzo1_0112721, Aspzo1_0127952, Aspzo1_0154500
Small-scale	SNP	scf_000002_A_fumigatus_A1163	4691770	4691771	T->C	Y	AFUB_033470	4690609	4692340	NA	Has domain(s) with predicted RNA polymerase II transcription factor activity, sequence-specific DNA binding, zinc ion binding activity, role in regulation of transcription, DNA-templated and nucleus localization
Small-scale	SNP	scf_000002_A_fumigatus_A1163	4692034	4692035	C->G	Y	AFUB_033470	4690609	4692340	NA	Has domain(s) with predicted RNA polymerase II transcription factor activity, sequence-specific DNA binding, zinc ion binding activity, role in regulation of transcription, DNA-templated and nucleus localization
Small-scale	SNP	scf_000002_A_fumigatus_A1163	4692037	4692038	T->C	Y	AFUB_033470	4690609	4692340	NA	Has domain(s) with predicted RNA polymerase II transcription factor activity, sequence-specific DNA binding, zinc ion binding activity, role in regulation of transcription, DNA-templated and nucleus localization
Small-scale	SNP	scf_000002_A_fumigatus_A1163	4693536	4693537	A->G	Y	AFUB_033480	4692992	4694221	NA	Has domain(s) with predicted role in response to stress and integral component of membrane localization
Small-scale	SNP	scf_000002_A_fumigatus_A1163	4693822	4693823	T->G	Y	AFUB_033480	4692992	4694221	NA	Has domain(s) with predicted role in response to stress and integral component of membrane localization
Small-scale	SNP	scf_000002_A_fumigatus_A1163	4693856	4693857	T->C	Y	AFUB_033480	4692992	4694221	NA	Has domain(s) with predicted role in response to stress and integral component of membrane localization
Small-scale	SNP	scf_000002_A_fumigatus_A1163	4697724	4697725	C->T	Y	AFUB_033500	4696341	4697994	NA	Has domain(s) with predicted O-methyltransferase activity
Small-scale	SNP	scf_000002_A_fumigatus_A1163	4698426	4698427	A->G	Y	AFUB_033510	4698346	4699783	NA	Ortholog of A. nidulans FGSC A4 : AN6413, AN6419, AN6946, AN5312, AN5664, AN8328, AN3241, AN10369, AN1930, AN2386, AN1738, AN11159, AN8984, AN8951, AN1540, AN8971, AN9387, AN9266, AN9306, AN1317, AN10886, AN7232, AN7774, AN12202
Small-scale	SNP	scf_000002_A_fumigatus_A1163	4698433	4698434	T->C	Y	AFUB_033510	4698346	4699783	NA	Ortholog of A. nidulans FGSC A4 : AN6413, AN6419, AN6946, AN5312, AN5664, AN8328, AN3241, AN10369, AN1930, AN2386, AN1738, AN11159, AN8984, AN8951, AN1540, AN8971, AN9387, AN9266, AN9306, AN1317, AN10886, AN7232, AN7774, AN12202
Small-scale	SNP	scf_000002_A_fumigatus_A1163	4703313	4703314	T->G	Y	AFUB_033530	4703109	4704178	NA	Has domain(s) with predicted 3-beta-hydroxy-delta5-steroid dehydrogenase activity and role in oxidation-reduction process, steroid biosynthetic process
Small-scale	SNP	scf_000002_A_fumigatus_A1163	4703761	4703762	T->G	Y	AFUB_033530	4703109	4704178	NA	Has domain(s) with predicted 3-beta-hydroxy-delta5-steroid dehydrogenase activity and role in oxidation-reduction process, steroid biosynthetic process
Small-scale	SNP	scf_000002_A_fumigatus_A1163	4703842	4703843	T->G	Y	AFUB_033530	4703109	4704178	NA	Has domain(s) with predicted 3-beta-hydroxy-delta5-steroid dehydrogenase activity and role in oxidation-reduction process, steroid biosynthetic process
Small-scale	SNP	scf_000002_A_fumigatus_A1163	4703861	4703862	G->C	Y	AFUB_033530	4703109	4704178	NA	Has domain(s) with predicted 3-beta-hydroxy-delta5-steroid dehydrogenase activity and role in oxidation-reduction process, steroid biosynthetic process
Small-scale	SNP	scf_000002_A_fumigatus_A1163	4705811	4705812	A->G	Y	AFUB_033540	4705072	4707339	NA	Ortholog(s) have role in cellular response to drug, growth of symbiont in host and positive regulation of cell adhesion involved in single-species biofilm formation, more
Small-scale	SNP	scf_000002_A_fumigatus_A1163	4707472	4707473	T->C	Y	AFUB_033550	4707342	4708201	NA	Has domain(s) with predicted oxidoreductase activity and role in metabolic process
Small-scale	SNP	scf_000002_A_fumigatus_A1163	4709429	4709430	A->G	Y	AFUB_033560	4708509	4710186	NA	Has domain(s) with predicted RNA polymerase II transcription factor activity, sequence-specific DNA binding, zinc ion binding activity, role in regulation of transcription, DNA-templated and nucleus localization
Small-scale	SNP	scf_000002_A_fumigatus_A1163	4712844	4712845	G->C	Y	AFUB_033580	4712094	4714192	NA	Has domain(s) with predicted DNA binding, zinc ion binding activity, role in transcription, DNA-templated and nucleus localization
Small-scale	SNP	scf_000002_A_fumigatus_A1163	4713141	4713142	G->A	Y	AFUB_033580	4712094	4714192	NA	Has domain(s) with predicted DNA binding, zinc ion binding activity, role in transcription, DNA-templated and nucleus localization
Small-scale	SNP	scf_000002_A_fumigatus_A1163	4713306	4713307	C->G	Y	AFUB_033580	4712094	4714192	NA	Has domain(s) with predicted DNA binding, zinc ion binding activity, role in transcription, DNA-templated and nucleus localization
Small-scale	SNP	scf_000002_A_fumigatus_A1163	4713340	4713341	A->G	Y	AFUB_033580	4712094	4714192	NA	Has domain(s) with predicted DNA binding, zinc ion binding activity, role in transcription, DNA-templated and nucleus localization
Small-scale	SNP	scf_000002_A_fumigatus_A1163	4713445	4713446	C->T	Y	AFUB_033580	4712094	4714192	NA	Has domain(s) with predicted DNA binding, zinc ion binding activity, role in transcription, DNA-templated and nucleus localization
[truncated: 11,723 more rows]

## Sheet: Indels
#	File Explanation
#	col1: mutation class
#	col2: mutation type
#	col3: A1163 scaffold
[truncated: 324 more rows]

## Sheet: CNVs
#	File Explanation
[truncated: 292 more rows]
